# Supplementary material for: Runx3 Restoration Regresses K-Ras-Activated Mouse Lung Cancers and Inhibits Recurrence
Source: Cells. 2023 Oct 11;12(20):2438. doi: 10.3390/cells12202438 (PMC10605764; doi:10.3390/cells12202438)
Supplement: Supplementary file 1 [file cells-12-02438-s001.zip › Supplementary Data 2 (mRNA_sequencing).xlsx]

## Sheet: Raw_Data
	raw Data (FPKM)		Normalized Data (log2)		Fold_Change (log2)	Annotation
Gene symbol	KPR-	KPRrestored	KPR-	KPRrestored	(KPRrestored)- (KPR-)	Entrez ID	chromosome	start	end	strand	transcript_id	bioType	Aliases	Description
0610005C13Rik	0	0	-7.64386	-7.64386	0	71661	chr7	45567795	45575176	-	NR_038166	lncRNA	AI182092	RIKEN cDNA 0610005C13 gene
0610007P14Rik	40.6227	47.5242	5.34439	5.57074	0.22635	58520	chr12	85815455	85824545	-	NM_021446	protein_coding	1190004E09Rik| AU019315| C77855| ORF11	RIKEN cDNA 0610007P14 gene
0610009B22Rik	16.7083	24.1175	4.06292	4.59231	0.529383	66050	chr11	51685385	51688634	-	NM_025319	protein_coding	RP23-79E13.7	RIKEN cDNA 0610009B22 gene
0610009L18Rik	0.443273	0.985373	-1.15755	-0.0139561	1.14359	66838	chr11	120348678	120351190	+	NR_038126	lncRNA	.	RIKEN cDNA 0610009L18 gene
0610009O20Rik	14.9682	13.3153	3.90431	3.73555	-0.168756	66839	chr18	38250249	38262629	+	NM_024179	protein_coding	2700004E22Rik| Dele| Kiaa0141	RIKEN cDNA 0610009O20 gene
0610010B08Rik	0.933376	0.854748	-0.091762	-0.218014	-0.126252	100039060	chr2	175192005	175334677	-	NM_001177543	protein_coding	100039060| Gm2026	RIKEN cDNA 0610010B08 gene
0610010F05Rik	11.2935	9.4585	3.49806	3.24237	-0.255685	71675	chr11	23573776	23633631	-	NM_027860	protein_coding	Kiaa1841| mKIAA1841	RIKEN cDNA 0610010F05 gene
0610010K14Rik	35.5638	35.1963	5.15254	5.13756	-0.0149836	104457	chr11	70235204	70237914	-	NM_145758	protein_coding	1110020A23Rik| AL033328| AU045833| Bap18	RIKEN cDNA 0610010K14 gene
0610011F06Rik	24.7398	29.264	4.62905	4.8713	0.242248	68347	chr17	25875500	25877163	+	NM_026686	protein_coding	.	RIKEN cDNA 0610011F06 gene
0610012G03Rik	14.4702	15.1625	3.85551	3.92291	0.0674	106264	chr16	31947051	31948521	-	NR_027897	lncRNA	AI839730	RIKEN cDNA 0610012G03 gene
0610030E20Rik	6.7579	6.76713	2.75764	2.75961	0.00196765	68364	chr6	72347317	72353160	+	NM_026696	protein_coding	1500031N04Rik| 2810411C16Rik| AI461894	RIKEN cDNA 0610030E20 gene
0610031O16Rik	0	0	-7.64386	-7.64386	0	68369	chr3	138210717	138239663	-	NR_045760	lncRNA	.	RIKEN cDNA 0610031O16 gene
0610037L13Rik	7.14492	7.49211	2.83793	2.90633	0.0684075	74098	chr4	107889899	107897802	+	NM_028754	protein_coding	1110008H16Rik	RIKEN cDNA 0610037L13 gene
0610038B21Rik	1.73735	1.86232	0.801034	0.900969	0.0999347	70345	chr8	77517056	77518578	+	NR_028125	lncRNA	.	RIKEN cDNA 0610038B21 gene
0610039H22Rik	0	0	-7.64386	-7.64386	0	68397	chr11	88619251	88623426	+	NR_131025	lncRNA	.	RIKEN cDNA 0610039H22 gene
0610039K10Rik	0.860083	0.842188	-0.20909	-0.239246	-0.0301564	68386	chr2	163644850	163645800	+	NR_028113	lncRNA	.	RIKEN cDNA 0610039K10 gene
0610040B10Rik	0.581959	1.35982	-0.768668	0.448711	1.21738	67672	chr5	143329308	143332704	+	NR_027874	lncRNA	.	RIKEN cDNA 0610040B10 gene
0610040F04Rik	0	0	-7.64386	-7.64386	0	75394	chr6	108577036	108660934	-	NR_104577	lncRNA	.	RIKEN cDNA 0610040F04 gene
0610040J01Rik	15.8949	20.5274	3.99095	4.35983	0.368885	76261	chr5	63812495	63899619	+	NM_029554	protein_coding	AI662686	RIKEN cDNA 0610040J01 gene
0610043K17Rik	0	0	-7.64386	-7.64386	0	68400	chr4	101353783	101399185	+	NR_040640	lncRNA	.	RIKEN cDNA 0610043K17 gene
1010001N08Rik	1.14928	2.79866	0.206993	1.48731	1.28032	68434	chr18	11042037	11052567	-	NR_105023	lncRNA	.	RIKEN cDNA 1010001N08 gene
1110001J03Rik	39.7973	41.203	5.31478	5.36485	0.0500726	66117	chr6	38534861	38539449	+	NM_025363	protein_coding	Fmc1	RIKEN cDNA 1110001J03 gene
1110002L01Rik	3.78593	3.33146	1.92255	1.73832	-0.184234	100043040	chr12	3403883	3426747	-	NR_030694	lncRNA	.	RIKEN cDNA 1110002L01 gene
1110004E09Rik	26.5409	29.6617	4.73042	4.89077	0.160355	68001	chr16	90925811	90934849	-	NM_026502	protein_coding	.	RIKEN cDNA 1110004E09 gene
1110004F10Rik	76.0794	78.895	6.24953	6.30195	0.0524246	56372	chr7	116093380	116105210	+	NM_019772	protein_coding	sid2057| sid2057p| Smacp| Smap	RIKEN cDNA 1110004F10 gene
1110006O24Rik	1.30317	2.32127	0.38755	1.21802	0.830469	66123	chr5	115631049	115631816	-	NR_027810	lncRNA	.	RIKEN cDNA 1110006O24 gene
1110007C09Rik	47.3035	61.4025	5.56403	5.94034	0.376315	.	chr13	49202951	49216026	-	NM_026738	.	.	.
1110008F13Rik	49.4	47.3545	5.62659	5.56558	-0.0610032	67388	chr2	156863122	156873562	+	NM_026124	protein_coding	AI316789	RIKEN cDNA 1110008F13 gene
1110008L16Rik	6.25599	6.89982	2.64639	2.7876	0.141213	66132	chr12	55302637	55382491	+	NM_025373	protein_coding	Kiaa0391| mKIAA0391| Mrpp3	RIKEN cDNA 1110008L16 gene
1110008P14Rik	23.445	33.6356	4.55152	5.07213	0.520616	73737	chr2	32379101	32381915	-	NM_198001	protein_coding	C79326	RIKEN cDNA 1110008P14 gene
1110012L19Rik	15.0584	22.2447	3.91298	4.47571	0.562738	68618	chrX	70385913	70389416	+	NM_026787	protein_coding	.	RIKEN cDNA 1110012L19 gene
1110015O18Rik	0	0	-7.64386	-7.64386	0	100503859	chr3	4798708	4814911	+	NR_045272	lncRNA	.	RIKEN cDNA 1110015O18 gene
1110017D15Rik	0	0.249674	-7.64386	-1.97328	5.67058	73721	chr4	41505009	41517333	-	NM_001253788	protein_coding	Cbe1| Smrp1	RIKEN cDNA 1110017D15 gene
1110019D14Rik	0.0354194	0	-4.62881	-7.64386	-3.01505	76311	chr6	13871569	13896421	+	NR_045995	lncRNA	.	RIKEN cDNA 1110019D14 gene
1110020A21Rik	0.347879	0.832665	-1.50275	-0.255555	1.2472	68531	chr17	84917182	84957423	-	NR_027929	lncRNA	2600015P10Rik	RIKEN cDNA 1110020A21 gene
1110025L11Rik	0	0	-7.64386	-7.64386	0	68637	chr16	89063410	89064002	-	NM_001276278	protein_coding	.	RIKEN cDNA 1110025L11 gene
1110028F11Rik	0	0	-7.64386	-7.64386	0	68690	chr11	87699524	87705327	+	NR_045139	lncRNA	.	RIKEN cDNA 1110028F11 gene
1110028F18Rik	0	0	-7.64386	-7.64386	0	68692	chr8	106587143	106594820	+	NR_045470	lncRNA	.	RIKEN cDNA 1110028F18 gene
1110032A03Rik	1.33564	1.24369	0.422922	0.320415	-0.102507	68721	chr9	50762828	50768152	-	NM_023483	protein_coding	4930500N06Rik| c11orf1	RIKEN cDNA 1110032A03 gene
1110032F04Rik	0.0964537	0.0374925	-3.30111	-4.55665	-1.25554	68725	chr3	68869586	68872163	+	NM_001167996	protein_coding	AI115547	RIKEN cDNA 1110032F04 gene
1110034G24Rik	1.04909	1.16363	0.0759981	0.224818	0.14882	73747	chr2	132690283	132751055	+	NM_028637	protein_coding	.	RIKEN cDNA 1110034G24 gene
1110036E04Rik	0	0	-7.64386	-7.64386	0	68697	chr9	64049829	64054100	+	NR_040713	lncRNA	.	RIKEN cDNA 1110036E04 gene
1110037F02Rik	11.1058	9.5029	3.47389	3.24913	-0.224764	66185	chr4	11485958	11551143	+	NM_001081183	protein_coding	4930422M05Rik| Kiaa1429| mKIAA1429	RIKEN cDNA 1110037F02 gene
1110038B12Rik	175.658	194.94	7.45667	7.60692	0.150257	68763	chr17	34950236	34952468	-	NR_027943	lncRNA	0610009C20Rik| 0910001G04Rik	RIKEN cDNA 1110038B12 gene
1110038F14Rik	24.5638	30.1267	4.61876	4.91321	0.294455	117171	chr15	76948544	76950731	+	NM_054099	protein_coding	.	RIKEN cDNA 1110038F14 gene
1110046J04Rik	1.44298	1.73282	0.534042	0.797279	0.263237	68808	chr13	33936032	33960181	+	NR_040707	lncRNA	.	RIKEN cDNA 1110046J04 gene
1110051M20Rik	4.61981	4.57001	2.20939	2.19377	-0.0156192	228356	chr2	91277828	91444642	-	NM_175123	protein_coding	AI586322	RIKEN cDNA 1110051M20 gene
1110058D11Rik	0.198639	0	-2.29591	-7.64386	-5.34794	68771	chr17	64049862	64050672	-	NR_130982	lncRNA	.	RIKEN cDNA 1110058D11 gene
1110059E24Rik	27.3376	29.6834	4.77308	4.89183	0.118749	66206	chr19	21597313	21652791	-	NM_025423	protein_coding	.	RIKEN cDNA 1110059E24 gene
1110059G10Rik	1.46478	2.09812	0.5556	1.07253	0.516931	66202	chr9	122945089	122951000	-	NM_025419	protein_coding	.	RIKEN cDNA 1110059G10 gene
1110065P20Rik	17.5358	19.421	4.13264	4.27992	0.147274	68920	chr4	124849485	124850730	-	NM_001142727	protein_coding	C530005M16Rik	RIKEN cDNA 1110065P20 gene
1190002F15Rik	10.9519	12.0331	3.45377	3.58954	0.135768	.	chr6	134929092	134951718	+	NR_037955	.	.	.
1190002N15Rik	6.23276	3.15505	2.64103	1.65995	-0.981081	68861	chr9	94517864	94538081	-	NM_001033145	protein_coding	GoPro49| HASF	RIKEN cDNA 1190002N15 gene
1190003K10Rik	0	0	-7.64386	-7.64386	0	68880	chr13	64481246	64497792	-	NM_001195435	protein_coding	.	RIKEN cDNA 1190003K10 gene
1190005I06Rik	0.552383	0.785117	-0.843259	-0.339862	0.503397	68918	chr8	120608602	120634382	-	NM_197988	protein_coding	.	RIKEN cDNA 1190005I06 gene
1190007I07Rik	8.54032	10.004	3.09513	3.32323	0.228091	544717	chr10	82619851	82623228	-	NM_001135567	protein_coding	.	RIKEN cDNA 1190007I07 gene
1200014J11Rik	7.49779	7.16859	2.90743	2.8427	-0.0647319	.	chr11	73047867	73083579	+	NM_025818	.	.	.
1300002E11Rik	4.02956	4.36803	2.01241	2.12863	0.116222	100043489	chr16	21794347	21809039	+	NR_037957	lncRNA	1500026P21Rik	RIKEN cDNA 1300002E11 gene
1300017J02Rik	0	0.0645086	-7.64386	-3.84666	3.79719	71775	chr9	103250530	103288297	-	NM_027918	protein_coding	Ica| mICA	RIKEN cDNA 1300017J02 gene
1500004A13Rik	1.4704	1.10297	0.561106	0.147919	-0.413187	319830	chr3	88822010	88832487	-	NR_015498	lncRNA	5430404N14Rik| BB132176	RIKEN cDNA 1500004A13 gene
1500009C09Rik	0	0	-7.64386	-7.64386	0	76505	chr15	82252397	82260751	+	NR_037697	lncRNA	.	RIKEN cDNA 1500009C09 gene
1500009L16Rik	0.0926412	0	-3.35637	-7.64386	-4.28749	69784	chr10	83722865	83762762	+	NM_001145198	protein_coding	2700050C19Rik| OCC-1	RIKEN cDNA 1500009L16 gene
1500011B03Rik	7.68001	8.47545	2.94205	3.08414	0.142094	66236	chr5	114808196	114813976	-	NR_027817	lncRNA	AI415201| AV141149| AW556386	RIKEN cDNA 1500011B03 gene
1500011K16Rik	16.2662	12.7009	4.02425	3.66743	-0.356822	67885	chr2	127791377	127792488	-	NR_015476	lncRNA	.	RIKEN cDNA 1500011K16 gene
1500012F01Rik	64.7904	94.9547	6.01782	6.56924	0.551424	.	chr2	167062934	167065862	+	NM_001081005	.	.	.
1500012K07Rik	0	0	-7.64386	-7.64386	0	68954	chr7	75308696	75331419	+	NR_045812	lncRNA	.	RIKEN cDNA 1500012K07 gene
1500015A07Rik	0.96598	1.85338	-0.0424865	0.894046	0.936532	68982	chr18	61726390	61728253	+	NR_029432	lncRNA	.	RIKEN cDNA 1500015A07 gene
1500015L24Rik	0	0	-7.64386	-7.64386	0	68994	chr19	20405288	20422785	+	NR_045817	lncRNA	.	RIKEN cDNA 1500015L24 gene
1500015O10Rik	0.134223	0	-2.84453	-7.64386	-4.79933	78896	chr1	43730602	43742564	+	NM_024283	protein_coding	Ecrg4	RIKEN cDNA 1500015O10 gene
1500017E21Rik	0.0931545	0.561189	-3.3488	-0.820644	2.52816	668215	chr19	36619418	36689479	-	NR_033510	lncRNA	668215	RIKEN cDNA 1500017E21 gene
1500026H17Rik	0.0646968	0.0471267	-3.84276	-4.26183	-0.41907	69002	chr10	89686363	89700866	+	NR_130956	lncRNA	.	RIKEN cDNA 1500026H17 gene
1600002D24Rik	0	0	-7.64386	-7.64386	0	69776	chr16	95831123	95929077	-	NR_040485	lncRNA	.	RIKEN cDNA 1600002D24 gene
1600002H07Rik	9.82739	9.53448	3.29754	3.25391	-0.0436315	72016	chr17	24215056	24220769	-	NM_028056	protein_coding	.	RIKEN cDNA 1600002H07 gene
1600002K03Rik	22.3229	17.3535	4.48078	4.11757	-0.363205	69770	chr10	80172944	80175119	+	NM_027207	protein_coding	.	RIKEN cDNA 1600002K03 gene
1600010M07Rik	0	0	-7.64386	-7.64386	0	69781	chr7	109998377	110006646	-	NR_037959	lncRNA	.	RIKEN cDNA 1600010M07 gene
1600012H06Rik	15.6269	12.1457	3.96642	3.60297	-0.363454	67912	chr17	14943184	14945939	+	NM_001083880	protein_coding	.	RIKEN cDNA 1600012H06 gene
1600014C10Rik	4.20805	4.57957	2.07487	2.19679	0.121921	72244	chr7	38183217	38197565	+	NM_001085385	protein_coding	AI428873	RIKEN cDNA 1600014C10 gene
1600014C23Rik	0.439326	0.727863	-1.17031	-0.448385	0.721925	72240	chr17	45732864	45733844	-	NM_028164	protein_coding	.	RIKEN cDNA 1600014C23 gene
1600014K23Rik	0	0	-7.64386	-7.64386	0	.	chrX	85249677	85270291	+	NM_028046	.	.	.
1600015I10Rik	0	0	-7.64386	-7.64386	0	69761	chr6	48929896	48933687	+	NM_001081273	protein_coding	AI429442| Doxl1	RIKEN cDNA 1600015I10 gene
1600019K03Rik	0	0	-7.64386	-7.64386	0	69768	chr16	35503170	35509419	-	NR_040481	lncRNA	.	RIKEN cDNA 1600019K03 gene
1600020E01Rik	10.2114	9.25011	3.35282	3.21025	-0.142565	72012	chr6	86527330	86564449	+	NR_037960	lncRNA	.	RIKEN cDNA 1600020E01 gene
1600023N17Rik	0.285334	0.390847	-1.78421	-1.33699	0.447229	69788	chr5	45668701	45669708	-	NR_073433	lncRNA	AV119442	RIKEN cDNA 1600023N17 gene
1600025M17Rik	0	0	-7.64386	-7.64386	0	72030	chrX	56317608	56320664	+	NR_038168	lncRNA	Gm394	RIKEN cDNA 1600025M17 gene
1600027J07Rik	0	0	-7.64386	-7.64386	0	69794	chr8	103343878	103347534	-	NR_036588	lncRNA	.	RIKEN cDNA 1600027J07 gene
1600029I14Rik	0	0	-7.64386	-7.64386	0	69797	chr9	99470421	99474751	+	NR_028123	lncRNA	.	RIKEN cDNA 1600029I14 gene
1600029O15Rik	0.0285465	0	-4.89769	-7.64386	-2.74616	665268	chr9	58202897	58208808	+	NR_033522	misc_RNA	.	RIKEN cDNA 1600029O15 gene
1700001C02Rik	0	0	-7.64386	-7.64386	0	75434	chr5	30466077	30484087	+	NM_029285	protein_coding	1700047H18Rik	RIKEN cDNA 1700001C02 gene
1700001C19Rik	0.0969475	0.0393613	-3.2941	-4.49455	-1.20045	75462	chr17	47412734	47437375	-	NM_029296	protein_coding	.	RIKEN cDNA 1700001C19 gene
1700001D01Rik	0	0	-7.64386	-7.64386	0	69279	chr8	61281522	61288872	-	NR_045475	lncRNA	.	RIKEN cDNA 1700001D01 gene
1700001F09Rik	0	0	-7.64386	-7.64386	0	71826	chr14	43342384	43347811	-	NM_027940	protein_coding	Gm10377	RIKEN cDNA 1700001F09 gene
1700001G01Rik	0	0	-7.64386	-7.64386	0	75433	chr18	17035508	17137559	+	NR_130158	lncRNA	.	RIKEN cDNA 1700001G01 gene
1700001G11Rik	0.325214	0.319598	-1.59853	-1.62327	-0.0247472	69303	chr14	66295329	66297129	-	NR_038077	lncRNA	.	RIKEN cDNA 1700001G11 gene
1700001G17Rik	0.737148	0.459798	-0.430221	-1.10532	-0.675103	67503	chr1	33669824	33670712	+	NR_033199	lncRNA	.	RIKEN cDNA 1700001G17 gene
1700001J03Rik	0	0	-7.64386	-7.64386	0	69282	chr5	146182450	146185304	-	NM_001008547	protein_coding	.	RIKEN cDNA 1700001J03 gene
1700001J11Rik	0.121374	0	-2.98423	-7.64386	-4.65963	72224	chr9	40050558	40053025	+	NR_033613	misc_RNA	.	RIKEN cDNA 1700001J11 gene
1700001K19Rik	0	0.179737	-7.64386	-2.43646	5.2074	66323	chr12	110667689	110682619	-	NM_025488	protein_coding	.	RIKEN cDNA 1700001K19 gene
1700001K23Rik	0	0	-7.64386	-7.64386	0	69319	chr19	53248736	53255205	-	NR_036590	lncRNA	.	RIKEN cDNA 1700001K23 gene
1700001L05Rik	0.410427	0.551114	-1.26733	-0.846547	0.420786	69291	chr15	83353847	83367297	-	NR_027980	lncRNA	.	RIKEN cDNA 1700001L05 gene
1700001L19Rik	0	0.0556089	-7.64386	-4.04433	3.59953	69315	chr13	68597439	68614231	+	NM_027035	protein_coding	.	RIKEN cDNA 1700001L19 gene
1700001O22Rik	1.67353	1.97583	0.747198	0.986105	0.238907	73598	chr2	30795563	30803664	-	NR_028486	protein_coding	1700113K14Rik| 4930549G18Rik	RIKEN cDNA 1700001O22 gene
1700001P01Rik	0.109495	0	-3.12664	-7.64386	-4.51721	72215	chr11	97771481	97775918	-	NM_028156	protein_coding	.	RIKEN cDNA 1700001P01 gene
1700003C15Rik	0	0	-7.64386	-7.64386	0	69345	chr5	11749833	11769308	-	NR_045478	lncRNA	.	RIKEN cDNA 1700003C15 gene
1700003D09Rik	0	0	-7.64386	-7.64386	0	69338	chr11	98350718	98358283	-	NR_045477	lncRNA	.	RIKEN cDNA 1700003D09 gene
1700003E16Rik	0.521118	0.627606	-0.926542	-0.660621	0.265921	71837	chr6	83156404	83162975	+	NM_027948	protein_coding	AU041756	RIKEN cDNA 1700003E16 gene
1700003E24Rik	0	0	-7.64386	-7.64386	0	100042663	chrX	93156221	93183944	+	NR_103799	misc_RNA	ENSMUSG00000067646| Gm14779| OTTMUSG00000017966| RP23-438H3.1	RIKEN cDNA 1700003E24 gene
1700003F12Rik	0.347438	0.854457	-1.50456	-0.218503	1.28606	75480	chr2	154548904	154550048	+	NM_029305	protein_coding	.	RIKEN cDNA 1700003F12 gene
1700003G13Rik	0	0	-7.64386	-7.64386	0	72229	chr9	45318266	45322079	-	NR_040720	lncRNA	.	RIKEN cDNA 1700003G13 gene
1700003G18Rik	0	0.109217	-7.64386	-3.13015	4.51371	69350	chr7	116081762	116093149	-	NR_029433	lncRNA	2610312K03Rik	RIKEN cDNA 1700003G18 gene
1700003H04Rik	0	0	-7.64386	-7.64386	0	384775	chr3	124565891	124581091	-	NR_015460	lncRNA	4930538K10Rik| 4933400D22Rik	RIKEN cDNA 1700003H04 gene
1700003I22Rik	0	0	-7.64386	-7.64386	0	69356	chr1	56018978	56020203	+	NR_126076	lncRNA	.	RIKEN cDNA 1700003I22 gene
1700003L19Rik	0	0	-7.64386	-7.64386	0	75493	chr16	12811390	12848653	+	NR_040507	lncRNA	.	RIKEN cDNA 1700003L19 gene
1700003M02Rik	0.090915	0	-3.3821	-7.64386	-4.26176	.	chr4	34711332	34730206	-	NM_027041	.	.	.
1700003M07Rik	0	0.0751997	-7.64386	-3.64026	4.0036	72225	chr4	129960374	129965138	+	NR_040647	lncRNA	.	RIKEN cDNA 1700003M07 gene
1700003P14Rik	0	0	-7.64386	-7.64386	0	75890	chr13	118556168	118588629	+	NR_045982	lncRNA	1700030O10Rik| 4930584L06Rik	RIKEN cDNA 1700003P14 gene
1700006A11Rik	0	0	-7.64386	-7.64386	0	71824	chr3	124401155	124426028	-	NM_027939	protein_coding	.	RIKEN cDNA 1700006A11 gene
1700006E09Rik	0	0	-7.64386	-7.64386	0	75437	chr11	101987056	101992264	+	NM_029287	protein_coding	.	RIKEN cDNA 1700006E09 gene
1700006F04Rik	0	0	-7.64386	-7.64386	0	75432	chr14	119749227	119751564	+	NR_045621	lncRNA	.	RIKEN cDNA 1700006F04 gene
1700006H21Rik	0	0	-7.64386	-7.64386	0	72257	chr13	107687397	107692168	+	NR_045900	lncRNA	.	RIKEN cDNA 1700006H21 gene
1700007B14Rik	0	0	-7.64386	-7.64386	0	71831	chr8	75448694	75984507	+	NM_027944	protein_coding	.	RIKEN cDNA 1700007B14 gene
1700007F19Rik	0	0	-7.64386	-7.64386	0	67850	chr3	58141707	58163807	-	NR_040538	lncRNA	.	RIKEN cDNA 1700007F19 gene
1700007G11Rik	0	0	-7.64386	-7.64386	0	75784	chr5	98329304	98802019	+	NM_001024614	protein_coding	4930428O21Rik	RIKEN cDNA 1700007G11 gene
1700007J10Rik	0.55627	0.0494206	-0.833233	-4.1997	-3.36647	69320	chr11	59725917	59740154	-	NR_045476	lncRNA	4930573L17Rik	RIKEN cDNA 1700007J10 gene
1700007K09Rik	0.0973931	0.191981	-3.28781	-2.34387	0.943938	69318	chr7	131325931	131329499	-	NM_027037	protein_coding	.	RIKEN cDNA 1700007K09 gene
1700007K13Rik	0.0765429	0	-3.6163	-7.64386	-4.02756	69327	chr2	28462001	28466324	-	NM_027040	protein_coding	Rbest47	RIKEN cDNA 1700007K13 gene
1700007L15Rik	1.77683	1.8304	0.83336	0.876095	0.0427348	100502742	chr16	33379854	33380736	-	NR_045709	lncRNA	linc-Iqcg| linc1609	RIKEN cDNA 1700007L15 gene
1700007P06Rik	0	0	-7.64386	-7.64386	0	69308	chr1	187125138	187127852	+	NR_040554	lncRNA	.	RIKEN cDNA 1700007P06 gene
1700008C04Rik	0	0	-7.64386	-7.64386	0	75494	chr12	51005156	51062543	+	NR_126468	lncRNA	.	RIKEN cDNA 1700008C04 gene
1700008J07Rik	1.02781	1.11891	0.0465749	0.168527	0.121952	629159	chr7	127510438	127512869	-	NR_024331	lncRNA	AW048743	RIKEN cDNA 1700008J07 gene
1700008K24Rik	0	0	-7.64386	-7.64386	0	69311	chr17	49112264	49113533	-	NR_038141	lncRNA	.	RIKEN cDNA 1700008K24 gene
1700008O03Rik	0	0	-7.64386	-7.64386	0	69349	chr7	44360045	44375030	-	NM_027049	protein_coding	.	RIKEN cDNA 1700008O03 gene
1700008P02Rik	0	0	-7.64386	-7.64386	0	69347	chr3	6615413	6620443	-	NM_027048	protein_coding	.	RIKEN cDNA 1700008P02 gene
1700009C05Rik	0	0	-7.64386	-7.64386	0	74220	chr6	81900465	81910800	-	NR_046040	lncRNA	.	RIKEN cDNA 1700009C05 gene
1700009J07Rik	0	0	-7.64386	-7.64386	0	75188	chr10	77893420	77896111	+	NR_015547	lncRNA	4930535B06Rik	RIKEN cDNA 1700009J07 gene
1700009N14Rik	0	0	-7.64386	-7.64386	0	75471	chr4	39450293	39451778	+	NM_001081095	protein_coding	AI429145| RP23-143B14.1	RIKEN cDNA 1700009N14 gene
1700010B08Rik	0	0	-7.64386	-7.64386	0	75485	chr2	173719415	173722086	+	NM_029308	protein_coding	.	RIKEN cDNA 1700010B08 gene
1700010D01Rik	0	0	-7.64386	-7.64386	0	76386	chrX	95732590	95733265	-	NM_029590	protein_coding	.	RIKEN cDNA 1700010D01 gene
1700010I02Rik	0	0	-7.64386	-7.64386	0	75476	chr3	7925303	7954887	-	NR_040587	lncRNA	.	RIKEN cDNA 1700010I02 gene
1700010I14Rik	0.218946	0.266345	-2.15878	-1.8818	0.276977	66931	chr17	8988333	9008319	+	NM_025851	protein_coding	.	RIKEN cDNA 1700010I14 gene
1700010J16Rik	0	0	-7.64386	-7.64386	0	69355	chr10	112726926	112785599	+	NR_040579	lncRNA	.	RIKEN cDNA 1700010J16 gene
1700010K23Rik	0	0	-7.64386	-7.64386	0	75501	chr16	66657118	66664626	+	NR_040512	lncRNA	.	RIKEN cDNA 1700010K23 gene
1700011A15Rik	0.394001	0.2574	-1.32554	-1.93016	-0.604625	.	chr15	101447745	101453909	+	NM_025487	.	.	.
1700011B04Rik	0	0	-7.64386	-7.64386	0	100503727	chr13	35181623	35188014	+	NR_045616	lncRNA	.	RIKEN cDNA 1700011B04 gene
1700011C11Rik	0	0	-7.64386	-7.64386	0	75451	chr7	71961175	72027317	+	NR_126462	lncRNA	.	RIKEN cDNA 1700011C11 gene
1700011E24Rik	0	0	-7.64386	-7.64386	0	75467	chr17	87389571	87427741	-	NM_029298	protein_coding	GSE	RIKEN cDNA 1700011E24 gene
1700011H14Rik	0.0952447	0	-3.3184	-7.64386	-4.32545	67082	chr14	49226359	49245428	-	NM_025956	protein_coding	.	RIKEN cDNA 1700011H14 gene
1700011I03Rik	0	0	-7.64386	-7.64386	0	75444	chr18	57533826	57731065	+	NM_029290	protein_coding	4930583I06Rik	RIKEN cDNA 1700011I03 gene
1700011L22Rik	0	0	-7.64386	-7.64386	0	67687	chr8	79210430	79248583	-	NM_026315	protein_coding	.	RIKEN cDNA 1700011L22 gene
1700011M02Rik	0	0	-7.64386	-7.64386	0	75443	chrX	102908905	102909651	+	NR_073044	lncRNA	.	RIKEN cDNA 1700011M02 gene
1700012A03Rik	0	0	-7.64386	-7.64386	0	76382	chr6	32050288	32058915	+	NM_029587	protein_coding	AI429084	RIKEN cDNA 1700012A03 gene
1700012B07Rik	0	0.0611518	-7.64386	-3.91808	3.72578	69324	chr11	109788291	109828046	-	NM_001162428	protein_coding	1700069D21Rik	RIKEN cDNA 1700012B07 gene
1700012B09Rik	0	0.28247	-7.64386	-1.79852	5.84534	69325	chr9	14758194	14771030	-	NM_029306	protein_coding	1700007P19Rik	RIKEN cDNA 1700012B09 gene
1700012C14Rik	0.156329	0	-2.63192	-7.64386	-5.01193	69337	chr6	30460985	30463313	+	NR_131049	lncRNA	.	RIKEN cDNA 1700012C14 gene
1700012D01Rik	0.655269	0.737591	-0.598874	-0.42936	0.169514	72243	chr10	127667123	127668851	+	NR_045171	lncRNA	.	RIKEN cDNA 1700012D01 gene
1700012D14Rik	0	0.106852	-7.64386	-3.16034	4.48352	75479	chr7	111117673	111122675	-	NR_015573	lncRNA	.	RIKEN cDNA 1700012D14 gene
1700012D16Rik	0	0	-7.64386	-7.64386	0	75489	chr3	153296502	153298649	-	NR_126464	lncRNA	.	RIKEN cDNA 1700012D16 gene
1700012H19Rik	0	0	-7.64386	-7.64386	0	76393	chr11	112822965	112825128	-	NR_130164	lncRNA	.	RIKEN cDNA 1700012H19 gene
1700012I11Rik	0	0	-7.64386	-7.64386	0	69334	chr15	67226769	67377094	+	NR_045140	lncRNA	.	RIKEN cDNA 1700012I11 gene
1700012L04Rik	0.143264	0	-2.75376	-7.64386	-4.8901	76383	chrX	9283764	9284288	+	NM_029588	protein_coding	H2al1| RP23-423L11.3	RIKEN cDNA 1700012L04 gene
1700012P22Rik	0	0	-7.64386	-7.64386	0	69364	chr4	144418191	144438772	-	NM_027056	protein_coding	.	RIKEN cDNA 1700012P22 gene
1700013D24Rik	0.139372	0	-2.79214	-7.64386	-4.85172	76921	chr6	124347594	124357086	-	NM_001177502	protein_coding	.	RIKEN cDNA 1700013D24 gene
1700013F07Rik	0	0.234566	-7.64386	-2.0615	5.58235	75504	chr3	108537584	108544697	+	NM_029314	protein_coding	.	RIKEN cDNA 1700013F07 gene
1700013G24Rik	0	0	-7.64386	-7.64386	0	69380	chr4	137453296	137455461	+	NM_027063	protein_coding	AI507018	RIKEN cDNA 1700013G24 gene
1700013H16Rik	0	0	-7.64386	-7.64386	0	75514	chrX	53742901	53757831	-	NM_001200013	protein_coding	Slx2| Xlr6	RIKEN cDNA 1700013H16 gene
1700015E13Rik	0.180573	0	-2.42994	-7.64386	-5.21391	76925	chr1	170308861	170312125	+	NM_001039593	protein_coding	.	RIKEN cDNA 1700015E13 gene
1700015F17Rik	0	0	-7.64386	-7.64386	0	381716	chr5	5437827	5479143	-	NM_001200025	protein_coding	Gm1686	RIKEN cDNA 1700015F17 gene
1700015G11Rik	0	0	-7.64386	-7.64386	0	100503036	chr7	52011680	52015716	-	NM_001195601	protein_coding	Ccdc179	RIKEN cDNA 1700015G11 gene
1700016C15Rik	31.4437	30.5859	4.97493	4.93503	-0.0398978	69428	chr1	177729814	177753305	+	NM_027077	protein_coding	.	RIKEN cDNA 1700016C15 gene
1700016D06Rik	0	0	-7.64386	-7.64386	0	76413	chr8	11654924	11678750	-	NM_024271	protein_coding	.	RIKEN cDNA 1700016D06 gene
1700016G22Rik	0.47297	0.233949	-1.06501	-2.06523	-1.00022	71867	chr13	5855509	5858092	-	NR_045891	lncRNA	.	RIKEN cDNA 1700016G22 gene
1700016H13Rik	0.157565	0.0612371	-2.62091	-3.91622	-1.29531	74218	chr5	103648587	103655732	-	NM_028824	protein_coding	.	RIKEN cDNA 1700016H13 gene
1700016K19Rik	0	0.0627105	-7.64386	-3.88448	3.75938	74230	chr11	75999912	76003569	+	NM_198637	protein_coding	Liat1	RIKEN cDNA 1700016K19 gene
1700016L04Rik	0	0	-7.64386	-7.64386	0	69412	chr10	14705609	14759019	+	NR_045824	lncRNA	.	RIKEN cDNA 1700016L04 gene
1700016L21Rik	0	0	-7.64386	-7.64386	0	72208	chr1	80445932	80475660	+	NR_040460	lncRNA	Jr3	RIKEN cDNA 1700016L21 gene
1700016P04Rik	0	0	-7.64386	-7.64386	0	69413	chr6	13413337	13415996	+	NR_038149	lncRNA	.	RIKEN cDNA 1700016P04 gene
1700017B05Rik	13.4227	21.6678	3.74714	4.43781	0.690673	74211	chr9	57252322	57259140	-	NM_028820	protein_coding	AA682102| D9Ertd278e	RIKEN cDNA 1700017B05 gene
1700017D01Rik	0	0	-7.64386	-7.64386	0	69369	chr19	11096816	11130878	-	NM_027058	protein_coding	.	RIKEN cDNA 1700017D01 gene
1700017G19Rik	0	0	-7.64386	-7.64386	0	100040882	chr3	40504865	40522912	-	NR_040445	lncRNA	.	RIKEN cDNA 1700017G19 gene
1700017J07Rik	0	0	-7.64386	-7.64386	0	75508	chr2	168978269	168978906	+	NR_040326	lncRNA	.	RIKEN cDNA 1700017J07 gene
1700017L05Rik	0	0	-7.64386	-7.64386	0	69370	chr5	77465488	77468857	+	NR_131050	lncRNA	.	RIKEN cDNA 1700017L05 gene
1700017N19Rik	0	0	-7.64386	-7.64386	0	66605	chr10	100592386	100618391	+	NM_001081246	protein_coding	.	RIKEN cDNA 1700017N19 gene
1700018A04Rik	0	0	-7.64386	-7.64386	0	71307	chr13	31565492	31582513	-	NR_029439	lncRNA	4930551G20Rik| 4933439J11Rik	RIKEN cDNA 1700018A04 gene
1700018B08Rik	0	0	-7.64386	-7.64386	0	76405	chr8	121530784	121541954	-	NM_029597	protein_coding	1700084O22Rik	RIKEN cDNA 1700018B08 gene
1700018B24Rik	0	0	-7.64386	-7.64386	0	66332	chr3	48605731	48609100	-	NR_003617	misc_RNA	.	RIKEN cDNA 1700018B24 gene
1700018C11Rik	0	0	-7.64386	-7.64386	0	75524	chr4	63607091	63622429	-	NM_029324	protein_coding	bM230C2.3	RIKEN cDNA 1700018C11 gene
1700018F24Rik	0	0	-7.64386	-7.64386	0	69396	chr5	145042990	145045678	+	NM_027069	protein_coding	AV045857	RIKEN cDNA 1700018F24 gene
1700018G05Rik	0	0	-7.64386	-7.64386	0	69388	chrX	102928372	102929107	+	NR_045422	lncRNA	.	RIKEN cDNA 1700018G05 gene
1700018L02Rik	3.29713	1.84518	1.7234	0.887666	-0.835731	67329	chr19	29047483	29048729	+	NR_028360	lncRNA	.	RIKEN cDNA 1700018L02 gene
1700019A02Rik	0	0.107369	-7.64386	-3.15368	4.49017	69397	chr1	53158577	53187617	-	NM_027070	protein_coding	.	RIKEN cDNA 1700019A02 gene
1700019B03Rik	0	0.0316813	-7.64386	-4.76881	2.87504	76406	chr8	3470862	3487178	+	NM_029598	protein_coding	.	RIKEN cDNA 1700019B03 gene
1700019B21Rik	0	0	-7.64386	-7.64386	0	75545	chrX	62510539	62527011	-	NR_045443	lncRNA	.	RIKEN cDNA 1700019B21 gene
1700019C18Rik	0	0	-7.64386	-7.64386	0	75543	chr13	35210660	35212048	-	NR_126478	lncRNA	.	RIKEN cDNA 1700019C18 gene
1700019D03Rik	0.0728849	0	-3.68251	-7.64386	-3.96134	67080	chr1	52925127	52952840	-	NM_144953	protein_coding	2410136C24Rik| AA410151| smAKAP	RIKEN cDNA 1700019D03 gene
1700019E08Rik	0	0	-7.64386	-7.64386	0	69405	chr2	45696605	45698447	+	NR_040497	lncRNA	.	RIKEN cDNA 1700019E08 gene
1700019G17Rik	1.93084	1.55911	0.95296	0.645342	-0.307618	.	chr6	85899050	85904938	-	NM_029331	.	.	.
1700019G24Rik	0	0	-7.64386	-7.64386	0	72249	chr6	5963897	5977393	-	NR_040255	lncRNA	.	RIKEN cDNA 1700019G24 gene
1700019L03Rik	0.809925	0.728074	-0.295261	-0.447969	-0.152708	.	chr2	32777413	32784405	-	NM_025619	.	.	.
1700019M22Rik	0	0	-7.64386	-7.64386	0	69423	chr12	96046621	96047222	-	NR_103800	misc_RNA	.	RIKEN cDNA 1700019M22 gene
1700019N19Rik	0	0	-7.64386	-7.64386	0	67507	chr19	58785803	58794414	-	NM_026208	protein_coding	.	RIKEN cDNA 1700019N19 gene
1700019O17Rik	0	0	-7.64386	-7.64386	0	71863	chr1	86426329	86428049	+	NM_027966	protein_coding	.	RIKEN cDNA 1700019O17 gene
1700020A23Rik	0.143262	0	-2.75378	-7.64386	-4.89008	75656	chr2	130405259	130406074	+	NM_029375	protein_coding	.	RIKEN cDNA 1700020A23 gene
1700020D05Rik	1.12589	0.88115	0.177459	-0.174377	-0.351836	75555	chr19	5502769	5503787	-	NM_023781	protein_coding	mage-g2	RIKEN cDNA 1700020D05 gene
1700020D14Rik	0	0	-7.64386	-7.64386	0	69438	chrY	206150	323296	+	NR_126545_1	lncRNA	.	RIKEN cDNA 1700020D14 gene
1700020G17Rik	0	0	-7.64386	-7.64386	0	75630	chr10	110801174	110896507	-	NR_045979	lncRNA	4930480D05Rik	RIKEN cDNA 1700020G17 gene
1700020I14Rik	14.9849	16.8928	3.90592	4.07876	0.172845	66602	chr2	119594296	119600744	+	NR_015473	lncRNA	1190006L01Rik| 4933437I03Rik| AI451541| AI585852| AW538376| AW558897| Cyrano	RIKEN cDNA 1700020I14 gene
1700020L24Rik	2.20955	4.0193	1.14701	2.00874	0.861724	66330	chr11	83437694	83441232	+	NM_025492	protein_coding	.	RIKEN cDNA 1700020L24 gene
1700020M21Rik	0	0	-7.64386	-7.64386	0	76402	chr9	120913774	120915250	-	NR_040742	lncRNA	.	RIKEN cDNA 1700020M21 gene
1700020N01Rik	0	0	-7.64386	-7.64386	0	67692	chr10	21593145	21622375	+	NR_027968	lncRNA	.	RIKEN cDNA 1700020N01 gene
1700020N15Rik	0	0	-7.64386	-7.64386	0	75509	chrX	69945281	69945980	+	NM_029316	protein_coding	RP23-322C16.1	RIKEN cDNA 1700020N15 gene
1700020N18Rik	0	0	-7.64386	-7.64386	0	67086	chr1	91404879	91406029	-	NR_026924	lncRNA	.	RIKEN cDNA 1700020N18 gene
1700021F05Rik	20.2393	18.6683	4.33944	4.22291	-0.116539	67851	chr10	43525121	43540994	-	NM_026411	protein_coding	.	RIKEN cDNA 1700021F05 gene
1700021F07Rik	0	0	-7.64386	-7.64386	0	72221	chr2	173522592	173528502	+	NM_028158	protein_coding	.	RIKEN cDNA 1700021F07 gene
1700021K19Rik	9.0193	9.88381	3.17382	3.3058	0.131982	.	chr16	32821702	32868366	-	NM_172615	.	.	.
1700021N21Rik	0	0	-7.64386	-7.64386	0	69409	chr4	134448765	134450171	-	NR_045800	lncRNA	.	RIKEN cDNA 1700021N21 gene
1700022A21Rik	0	0	-7.64386	-7.64386	0	72252	chr5	24645453	24648860	+	NR_003953	misc_RNA	.	RIKEN cDNA 1700022A21 gene
1700022A22Rik	0	0	-7.64386	-7.64386	0	71120	chr15	46324585	46373899	+	NR_045509	lncRNA	4933413D07Rik	RIKEN cDNA 1700022A22 gene
1700022E09Rik	0	0	-7.64386	-7.64386	0	75636	chr16	59466872	59469238	-	NR_040568	lncRNA	.	RIKEN cDNA 1700022E09 gene
1700022H01Rik	0	0.0943569	-7.64386	-3.33124	4.31262	75539	chr10	61674527	61680290	-	NR_126477	lncRNA	.	RIKEN cDNA 1700022H01 gene
1700022H16Rik	0	0	-7.64386	-7.64386	0	69420	chr12	9565236	9570585	-	NR_045488	lncRNA	.	RIKEN cDNA 1700022H16 gene
1700022I11Rik	0.0389966	0	-4.50646	-7.64386	-3.13739	67317	chr4	42969946	42974325	+	NM_026088	protein_coding	.	RIKEN cDNA 1700022I11 gene
1700023C21Rik	0	0	-7.64386	-7.64386	0	73257	chr11	109845878	109848476	+	NR_045909	lncRNA	.	RIKEN cDNA 1700023C21 gene
1700023F02Rik	0	0	-7.64386	-7.64386	0	69433	chr10	66120609	66124064	-	NR_038039	lncRNA	AV205046	RIKEN cDNA 1700023F02 gene
1700023F06Rik	0.184349	0.0450033	-2.40088	-4.32183	-1.92095	69441	chr11	103198944	103208548	-	NM_001254724	protein_coding	.	RIKEN cDNA 1700023F06 gene
1700024B18Rik	0	0	-7.64386	-7.64386	0	69393	chr14	123987635	124015684	+	NR_045479	lncRNA	.	RIKEN cDNA 1700024B18 gene
1700024F13Rik	0.395459	0	-1.32027	-7.64386	-6.32358	73270	chr13	3498050	3501393	+	NR_045363	lncRNA	.	RIKEN cDNA 1700024F13 gene
1700024G13Rik	0	0	-7.64386	-7.64386	0	67085	chr14	32376502	32388373	-	NM_001034037	protein_coding	C10orf53	RIKEN cDNA 1700024G13 gene
1700024I08Rik	0	0	-7.64386	-7.64386	0	75522	chr13	63675756	63734298	-	NR_126476	lncRNA	.	RIKEN cDNA 1700024I08 gene
1700024N05Rik	0	0	-7.64386	-7.64386	0	75520	chr6	43162454	43174858	-	NR_126471	lncRNA	.	RIKEN cDNA 1700024N05 gene
1700024P04Rik	0	0	-7.64386	-7.64386	0	69382	chr13	98984090	98984565	-	NM_027064	protein_coding	H2bl1| Subh2bv	RIKEN cDNA 1700024P04 gene
1700024P16Rik	0.0319582	0.0155153	-4.75796	-5.60716	-0.849194	242594	chr4	104913456	105016863	+	NM_001162980	protein_coding	C1orf168| Gm620	RIKEN cDNA 1700024P16 gene
1700025B11Rik	0	0	-7.64386	-7.64386	0	76409	chr15	77558240	77561892	-	NR_040310	lncRNA	.	RIKEN cDNA 1700025B11 gene
1700025C18Rik	0	0	-7.64386	-7.64386	0	72211	chr2	165078693	165090750	-	NR_033448	lncRNA	.	RIKEN cDNA 1700025C18 gene
1700025F22Rik	0	0	-7.64386	-7.64386	0	69416	chr19	11139683	11165320	-	NM_027074	protein_coding	.	RIKEN cDNA 1700025F22 gene
1700025F24Rik	0	0	-7.64386	-7.64386	0	67081	chr10	119413444	119426864	+	NR_040578	lncRNA	.	RIKEN cDNA 1700025F24 gene
1700025G04Rik	3.86234	2.37805	1.95134	1.25281	-0.698532	69399	chr1	151884524	152090320	-	NM_197990	protein_coding	2610510E02Rik| 2900042O04Rik| ENSMUSG00000073540	RIKEN cDNA 1700025G04 gene
1700025J12Rik	0	0	-7.64386	-7.64386	0	69407	chr7	121589903	121591591	+	NR_131051	lncRNA	.	RIKEN cDNA 1700025J12 gene
1700025K24Rik	0	0	-7.64386	-7.64386	0	69418	chr17	54352583	54370074	-	NR_045825	lncRNA	.	RIKEN cDNA 1700025K24 gene
1700025M24Rik	0	0.122773	-7.64386	-2.96835	4.67551	72276	chr5	73268580	73284184	-	NR_040689	lncRNA	.	RIKEN cDNA 1700025M24 gene
1700025N23Rik	0	0	-7.64386	-7.64386	0	69986	chr6	39063879	39067586	-	NR_040523	lncRNA	.	RIKEN cDNA 1700025N23 gene
1700026D08Rik	0	0	-7.64386	-7.64386	0	.	chr7	83775617	83794839	-	NM_029335	.	.	.
1700026D11Rik	0	0	-7.64386	-7.64386	0	70371	chr2	132490728	132524057	+	NR_028286	lncRNA	.	RIKEN cDNA 1700026D11 gene
1700026F02Rik	0	0	-7.64386	-7.64386	0	69419	chr8	71006728	71026755	-	NR_045487	lncRNA	.	RIKEN cDNA 1700026F02 gene
1700026J14Rik	0	0.0764528	-7.64386	-3.61789	4.02596	69432	chr6	48536582	48537474	-	NR_130985	lncRNA	.	RIKEN cDNA 1700026J14 gene
1700026L06Rik	0.492199	1.45561	-1.0081	0.546571	1.55468	.	chr2	28692080	28699651	-	NM_027283	.	.	.
1700027A15Rik	0	0	-7.64386	-7.64386	0	69449	chr1	73016036	73025508	+	NR_038001	lncRNA	.	RIKEN cDNA 1700027A15 gene
1700027F06Rik	0	0	-7.64386	-7.64386	0	72268	chr6	124363282	124364486	-	NR_131162	lncRNA	.	RIKEN cDNA 1700027F06 gene
1700027F09Rik	0	0	-7.64386	-7.64386	0	69999	chr5	64454813	64467942	-	NR_040681	lncRNA	.	RIKEN cDNA 1700027F09 gene
1700027H10Rik	0	0	-7.64386	-7.64386	0	72274	chr3	45416584	45439309	-	NR_040594	lncRNA	.	RIKEN cDNA 1700027H10 gene
1700027I24Rik	0	0	-7.64386	-7.64386	0	75567	chr9	36668856	36693189	-	NR_040741	lncRNA	.	RIKEN cDNA 1700027I24 gene
1700027J07Rik	0	0	-7.64386	-7.64386	0	69443	chr10	43746158	43765836	+	NR_040581	lncRNA	.	RIKEN cDNA 1700027J07 gene
1700028B04Rik	0	0	-7.64386	-7.64386	0	70001	chr7	28496941	28497492	+	NR_033605	misc_RNA	.	RIKEN cDNA 1700028B04 gene
1700028D13Rik	0	0	-7.64386	-7.64386	0	75569	chr5	112206763	112210002	+	NR_045377	lncRNA	.	RIKEN cDNA 1700028D13 gene
1700028E10Rik	0.0737256	0.0598934	-3.66702	-3.94578	-0.278761	625175	chr5	151368675	151414083	+	NR_045700	lncRNA	625175| A630054D14| Gm6561	RIKEN cDNA 1700028E10 gene
1700028I16Rik	0.107686	0.0526505	-3.14962	-4.11652	-0.966903	70003	chr10	82812123	82824242	+	NR_038042	lncRNA	.	RIKEN cDNA 1700028I16 gene
1700028J19Rik	0.279907	0.31891	-1.81144	-1.62634	0.185102	70004	chr7	44229930	44236122	-	NR_029436	lncRNA	.	RIKEN cDNA 1700028J19 gene
1700028K03Rik	0.554148	0.690897	-0.838698	-0.523054	0.315644	76421	chr5	107534711	107551542	+	NM_182745	protein_coding	.	RIKEN cDNA 1700028K03 gene
1700028M03Rik	0	0	-7.64386	-7.64386	0	69460	chr3	83555367	83574118	-	NR_036591	lncRNA	.	RIKEN cDNA 1700028M03 gene
1700028P14Rik	0	0	-7.64386	-7.64386	0	67483	chr19	23558760	23652812	-	NM_026188	protein_coding	AV209940	RIKEN cDNA 1700028P14 gene
1700028P15Rik	0	0	-7.64386	-7.64386	0	75655	chr2	171956879	171962799	-	NR_040509	lncRNA	.	RIKEN cDNA 1700028P15 gene
1700029B22Rik	0	0	-7.64386	-7.64386	0	69495	chr7	131146439	131150578	+	NR_040531	lncRNA	.	RIKEN cDNA 1700029B22 gene
1700029F12Rik	0	0	-7.64386	-7.64386	0	66479	chr13	97021864	97035254	-	NR_104276	protein_coding	.	RIKEN cDNA 1700029F12 gene
1700029H14Rik	0	0	-7.64386	-7.64386	0	66501	chr8	13550722	13562461	-	NM_025601	protein_coding	.	RIKEN cDNA 1700029H14 gene
1700029I15Rik	0.559845	0	-0.824073	-7.64386	-6.81978	75641	chr2	92382918	92383603	+	NM_183112	protein_coding	1700021K07Rik	RIKEN cDNA 1700029I15 gene
1700029J03Rik	0	0	-7.64386	-7.64386	0	72264	chr16	93396815	93458872	-	NR_040494	lncRNA	.	RIKEN cDNA 1700029J03 gene
1700029J07Rik	0.379204	0.298244	-1.38006	-1.72145	-0.341393	69479	chr8	45953606	45975252	-	NM_001033148	protein_coding	.	RIKEN cDNA 1700029J07 gene
1700029M20Rik	0	0	-7.64386	-7.64386	0	73937	chr4	135626655	135630198	+	NR_027909	lncRNA	4930406E24Rik	RIKEN cDNA 1700029M20 gene
1700029N11Rik	0	0	-7.64386	-7.64386	0	69491	chr13	44439727	44457567	+	NR_045489	lncRNA	.	RIKEN cDNA 1700029N11 gene
1700029P11Rik	0	0	-7.64386	-7.64386	0	66346	chr15	81980540	81981563	+	NM_025503	protein_coding	.	RIKEN cDNA 1700029P11 gene
1700030A11Rik	0	0	-7.64386	-7.64386	0	74179	chr17	28905265	28906771	+	NR_045457	lncRNA	.	RIKEN cDNA 1700030A11 gene
1700030C10Rik	0	0.0293517	-7.64386	-4.86347	2.78038	69513	chr12	20804392	20815779	-	NR_015521	lncRNA	.	RIKEN cDNA 1700030C10 gene
1700030F04Rik	0	0	-7.64386	-7.64386	0	72263	chr6	117679207	117751769	-	NR_045731	lncRNA	.	RIKEN cDNA 1700030F04 gene
1700030F18Rik	0	0	-7.64386	-7.64386	0	72277	chr15	99918348	99931658	-	NM_028180	protein_coding	FAM186A	RIKEN cDNA 1700030F18 gene
1700030J22Rik	0.380618	0.723312	-1.37476	-0.457371	0.917384	69528	chr8	116969599	116978943	-	NM_027103	protein_coding	.	RIKEN cDNA 1700030J22 gene
1700030K09Rik	3.93506	6.36815	1.97822	2.67201	0.693789	72254	chr8	72443880	72460541	+	NM_028170	protein_coding	.	RIKEN cDNA 1700030K09 gene
1700030L20Rik	0.587523	0.172506	-0.755057	-2.49406	-1.739	70055	chr3	136435270	136449349	-	NR_040592	lncRNA	.	RIKEN cDNA 1700030L20 gene
1700030M09Rik	0	0	-7.64386	-7.64386	0	72259	chr8	121544388	121547652	+	NR_045903	lncRNA	.	RIKEN cDNA 1700030M09 gene
1700030N03Rik	0	0	-7.64386	-7.64386	0	70011	chr19	3153799	3197703	-	NR_045304	lncRNA	1700087C08Rik	RIKEN cDNA 1700030N03 gene
1700030O20Rik	0	0	-7.64386	-7.64386	0	72286	chr10	116723067	116729177	-	NR_045345	lncRNA	.	RIKEN cDNA 1700030O20 gene
1700031A10Rik	0	0	-7.64386	-7.64386	0	73286	chr17	36923792	36933432	+	NR_045439	lncRNA	.	RIKEN cDNA 1700031A10 gene
1700031F05Rik	0	0	-7.64386	-7.64386	0	73300	chrX	102859187	102866353	-	NM_028496	protein_coding	RP23-76A20.6	RIKEN cDNA 1700031F05 gene
1700031M16Rik	0	0	-7.64386	-7.64386	0	73302	chr15	98398445	98416135	+	NR_015496	lncRNA	4930413L20Rik	RIKEN cDNA 1700031M16 gene
1700031P21Rik	0	0	-7.64386	-7.64386	0	73278	chr12	52599984	52602322	-	NR_045910	lncRNA	.	RIKEN cDNA 1700031P21 gene
1700034E13Rik	0	0	-7.64386	-7.64386	0	78414	chr18	52646220	52663731	+	NM_030097	protein_coding	.	RIKEN cDNA 1700034E13 gene
1700034G24Rik	0	0	-7.64386	-7.64386	0	67325	chr5	112582936	112589996	-	NR_045397	lncRNA	.	RIKEN cDNA 1700034G24 gene
1700034H15Rik	0.044038	0.0427314	-4.34996	-4.38892	-0.0389615	98736	chr1	191894072	191907527	-	NR_030669	lncRNA	4930557M11Rik| BB016121	RIKEN cDNA 1700034H15 gene
1700034I23Rik	0	0	-7.64386	-7.64386	0	73297	chr3	40900199	40902543	-	NR_045380	misc_RNA	.	RIKEN cDNA 1700034I23 gene
1700034J05Rik	0	0.0487476	-7.64386	-4.21766	3.4262	73344	chr6	146951301	146954421	-	NM_001164236	protein_coding	.	RIKEN cDNA 1700034J05 gene
1700034K08Rik	0	0	-7.64386	-7.64386	0	78349	chr9	92979916	93005733	-	NR_040756	lncRNA	.	RIKEN cDNA 1700034K08 gene
1700034O15Rik	0	0	-7.64386	-7.64386	0	76606	chr6	41684431	41685717	+	NM_029671	protein_coding	.	RIKEN cDNA 1700034O15 gene
1700034P13Rik	2.70024	4.05144	1.43576	2.02021	0.584458	73331	chr1	9747648	9771256	+	NR_040462	lncRNA	.	RIKEN cDNA 1700034P13 gene
1700036G14Rik	0	0	-7.64386	-7.64386	0	73283	chr3	85317519	85332027	+	NR_040542	lncRNA	.	RIKEN cDNA 1700036G14 gene
1700037C18Rik	1.54095	1.55634	0.628494	0.642785	0.0142911	73261	chr16	3905798	3908689	-	NM_028484	protein_coding	2810022L20Rik	RIKEN cDNA 1700037C18 gene
1700037H04Rik	45.9411	52.0966	5.52187	5.70326	0.181385	67326	chr2	131146325	131160020	-	NM_026091	protein_coding	.	RIKEN cDNA 1700037H04 gene
1700039E15Rik	0	0	-7.64386	-7.64386	0	76713	chr7	45282873	45288993	+	NM_001033176	protein_coding	Gm19188	RIKEN cDNA 1700039E15 gene
1700039E22Rik	0.324637	0.319023	-1.60105	-1.62583	-0.024782	73322	chr19	44828493	44835938	-	NR_045315	lncRNA	.	RIKEN cDNA 1700039E22 gene
1700040L02Rik	0	0	-7.64386	-7.64386	0	73287	chr10	68430956	68541875	-	NM_028491	protein_coding	.	RIKEN cDNA 1700040L02 gene
1700041A01Rik	0	0	-7.64386	-7.64386	0	73312	chr5	88291361	88301023	-	NR_126428	lncRNA	.	RIKEN cDNA 1700041A01 gene
1700041C23Rik	0	0	-7.64386	-7.64386	0	67319	chr9	57175275	57186110	+	NR_033784	lncRNA	.	RIKEN cDNA 1700041C23 gene
1700041M19Rik	0	0	-7.64386	-7.64386	0	76601	chr16	77004228	77010881	-	NR_040573	lncRNA	.	RIKEN cDNA 1700041M19 gene
1700042G07Rik	0	0	-7.64386	-7.64386	0	67323	chr4	116173372	116174297	+	NM_001099295	protein_coding	RP23-276M23.1	RIKEN cDNA 1700042G07 gene
1700042G15Rik	0	0	-7.64386	-7.64386	0	73349	chr4	57359792	57364292	-	NR_038179	lncRNA	.	RIKEN cDNA 1700042G15 gene
1700042O10Rik	0	0	-7.64386	-7.64386	0	73321	chr11	11868123	11885321	+	NR_045178	lncRNA	.	RIKEN cDNA 1700042O10 gene
1700044C05Rik	0	0	-7.64386	-7.64386	0	73306	chr14	118365878	118398165	+	NR_045624	lncRNA	.	RIKEN cDNA 1700044C05 gene
1700044K03Rik	0	0	-7.64386	-7.64386	0	67321	chr18	49523289	49524441	+	NR_033785	lncRNA	.	RIKEN cDNA 1700044K03 gene
1700045H11Rik	0	0	-7.64386	-7.64386	0	73348	chr4	150828225	150854949	-	NR_040649	lncRNA	.	RIKEN cDNA 1700045H11 gene
1700046C09Rik	0	0	-7.64386	-7.64386	0	73307	chr11	14560336	14599225	-	NR_045918	lncRNA	.	RIKEN cDNA 1700046C09 gene
1700047A11Rik	0	0	-7.64386	-7.64386	0	76604	chr8	26082609	26096520	+	NR_110583	lncRNA	4930554C15Rik	RIKEN cDNA 1700047A11 gene
1700047E10Rik	0.379115	0.250388	-1.38039	-1.96924	-0.588848	74328	chr14	44191607	44213237	-	NR_073363	lncRNA	.	RIKEN cDNA 1700047E10 gene
1700047G03Rik	0	0	-7.64386	-7.64386	0	73339	chr15	11967062	11970083	+	NR_040447	lncRNA	.	RIKEN cDNA 1700047G03 gene
1700047I17Rik2	0	0	-7.64386	-7.64386	0	100101807	chr12	55124528	55217146	+	NM_001100116	protein_coding	.	RIKEN cDNA 1700047I17 gene 2
1700047L14Rik	0	0	-7.64386	-7.64386	0	73295	chr5	108763842	108768917	+	NR_040691	lncRNA	.	RIKEN cDNA 1700047L14 gene
1700047M11Rik	0	0	-7.64386	-7.64386	0	67330	chr1	182300834	182303289	+	NR_015458	lncRNA	.	RIKEN cDNA 1700047M11 gene
1700048M11Rik	0	0.164145	-7.64386	-2.56367	5.08019	100503166	chr16	92308716	92312466	-	NR_045300	lncRNA	Gm15980| OTTMUSG00000028549	RIKEN cDNA 1700048M11 gene
1700048O20Rik	0.501631	0.515349	-0.980993	-0.942449	0.0385442	69430	chr9	121937275	121947016	+	NR_033553	lncRNA	1700022O21Rik	RIKEN cDNA 1700048O20 gene
1700049E15Rik	0	0	-7.64386	-7.64386	0	100039727	chr6	147690241	147702374	+	NR_033636	lncRNA	Gm15761| OTTMUSG00000026044	RIKEN cDNA 1700049E15 gene
1700049E22Rik	0	0	-7.64386	-7.64386	0	73395	chr6	100527400	100533426	+	NR_040525	lncRNA	.	RIKEN cDNA 1700049E22 gene
1700049G17Rik	1.84794	2.644	0.889816	1.40545	0.515632	73430	chr7	27907392	27929430	-	NM_028538	protein_coding	AV321011| BB026409	RIKEN cDNA 1700049G17 gene
1700049L16Rik	0	0	-7.64386	-7.64386	0	108950	chr10	71979885	71980690	-	NR_003644	misc_RNA	.	RIKEN cDNA 1700049L16 gene
1700051A21Rik	0	0	-7.64386	-7.64386	0	73366	chr11	72266844	72268556	+	NR_045922	lncRNA	.	RIKEN cDNA 1700051A21 gene
1700052I22Rik	0	0	-7.64386	-7.64386	0	67340	chr12	80923432	80924447	-	NR_033786	lncRNA	.	RIKEN cDNA 1700052I22 gene
1700052K11Rik	3.3795	4.37324	1.75894	2.13035	0.371408	73431	chr11	105179021	105181433	-	NR_027956	lncRNA	AI840954	RIKEN cDNA 1700052K11 gene
1700054A03Rik	0	0	-7.64386	-7.64386	0	78457	chr19	53076252	53084392	+	NR_045320	lncRNA	.	RIKEN cDNA 1700054A03 gene
1700054K19Rik	0	0	-7.64386	-7.64386	0	67336	chr6	112210708	112212518	+	NR_027865	lncRNA	.	RIKEN cDNA 1700054K19 gene
1700054M17Rik	0	0	-7.64386	-7.64386	0	73358	chr2	118304914	118308166	+	NR_045919	lncRNA	.	RIKEN cDNA 1700054M17 gene
1700055C04Rik	0	0	-7.64386	-7.64386	0	73397	chr9	64038465	64041465	-	NR_040726	lncRNA	.	RIKEN cDNA 1700055C04 gene
1700056E22Rik	2.28541	3.06162	1.19561	1.61665	0.421044	73363	chr1	184033032	184033998	-	NM_028516	protein_coding	.	RIKEN cDNA 1700056E22 gene
1700057G04Rik	0	0	-7.64386	-7.64386	0	78459	chr9	92309377	92357876	+	NM_001033184	protein_coding	RP23-21J17.1	RIKEN cDNA 1700057G04 gene
1700057H15Rik	0	0	-7.64386	-7.64386	0	78460	chr4	124449626	124485959	-	NR_040774	lncRNA	.	RIKEN cDNA 1700057H15 gene
1700057H21Rik	0	0	-7.64386	-7.64386	0	73375	chr2	51421050	51437900	-	NR_130155	lncRNA	.	RIKEN cDNA 1700057H21 gene
1700060C16Rik	0	0	-7.64386	-7.64386	0	73425	chr6	143593353	143651288	-	NR_045732	lncRNA	.	RIKEN cDNA 1700060C16 gene
1700060C20Rik	0	0	-7.64386	-7.64386	0	73399	chr2	158192008	158195734	+	NR_036606	lncRNA	.	RIKEN cDNA 1700060C20 gene
1700061F12Rik	0	0	-7.64386	-7.64386	0	73438	chr2	9189515	9197484	+	NR_038180	lncRNA	.	RIKEN cDNA 1700061F12 gene
1700061G19Rik	0.142421	0.0988769	-2.76199	-3.26705	-0.505067	78625	chr17	56875633	56888838	+	NM_030141	protein_coding	1700026H02| AI507598	RIKEN cDNA 1700061G19 gene
1700061I17Rik	0	0	-7.64386	-7.64386	0	433646	chr3	117060522	117077765	-	NR_038029	lncRNA	.	RIKEN cDNA 1700061I17 gene
1700061J23Rik	0	0	-7.64386	-7.64386	0	76993	chr11	23152140	23166375	+	NR_131065	lncRNA	.	RIKEN cDNA 1700061J23 gene
1700063A18Rik	0	0	-7.64386	-7.64386	0	73454	chr1	95990659	96021758	-	NR_040467	lncRNA	.	RIKEN cDNA 1700063A18 gene
1700063D05Rik	0	0	-7.64386	-7.64386	0	78500	chr9	41206155	41217627	+	NR_040392	lncRNA	.	RIKEN cDNA 1700063D05 gene
1700063O14Rik	0	0	-7.64386	-7.64386	0	73452	chr5	91766242	91767300	-	NR_045383	lncRNA	.	RIKEN cDNA 1700063O14 gene
1700064J06Rik	0	0	-7.64386	-7.64386	0	73400	chr10	119092905	119103107	+	NR_045348	lncRNA	.	RIKEN cDNA 1700064J06 gene
1700064M15Rik	0	0	-7.64386	-7.64386	0	73457	chr12	99626053	99627974	-	NR_045288	lncRNA	.	RIKEN cDNA 1700064M15 gene
1700065D16Rik	0.23993	0	-2.02956	-7.64386	-5.6143	73410	chr9	95855418	95857882	-	NM_001271569	protein_coding	.	RIKEN cDNA 1700065D16 gene
1700065I16Rik	0	0	-7.64386	-7.64386	0	78462	chr15	63817188	63819540	+	NR_040315	misc_RNA	1700084L08Rik	RIKEN cDNA 1700065I16 gene
1700065J11Rik	0	0	-7.64386	-7.64386	0	73409	chr6	35330846	35336829	+	NR_040526	lncRNA	.	RIKEN cDNA 1700065J11 gene
1700065J18Rik	0	0	-7.64386	-7.64386	0	73455	chr1	192841705	192842739	+	NR_040468	lncRNA	.	RIKEN cDNA 1700065J18 gene
1700065L07Rik	0	0	-7.64386	-7.64386	0	73408	chr6	73436965	73471021	-	NR_108032	lncRNA	.	RIKEN cDNA 1700065L07 gene
1700065O20Rik	0	0	-7.64386	-7.64386	0	76609	chr18	49803332	49817956	-	NR_045386	lncRNA	.	RIKEN cDNA 1700065O20 gene
1700066B17Rik	0	0	-7.64386	-7.64386	0	73426	chr1	39842428	39847330	-	NR_040465	lncRNA	.	RIKEN cDNA 1700066B17 gene
1700066B19Rik	0.039824	0.0967608	-4.47958	-3.29675	1.18284	73449	chr18	35726989	35730869	+	NM_001033168	protein_coding	.	RIKEN cDNA 1700066B19 gene
1700066J03Rik	0	0	-7.64386	-7.64386	0	67339	chr13	58146949	58148975	+	NR_126543	lncRNA	.	RIKEN cDNA 1700066J03 gene
1700066M21Rik	6.71406	5.06138	2.74826	2.34096	-0.407304	73467	chr1	57377620	57385422	+	NM_028546	protein_coding	AI428479	RIKEN cDNA 1700066M21 gene
1700066N21Rik	0	0	-7.64386	-7.64386	0	73471	chr5	87908588	87979351	-	NR_045924	lncRNA	.	RIKEN cDNA 1700066N21 gene
1700066O22Rik	0	0	-7.64386	-7.64386	0	74916	chr18	57504422	57533752	-	NR_015541	lncRNA	4930500F21Rik| 4930515O13Rik| 4930542C11Rik	RIKEN cDNA 1700066O22 gene
1700067G17Rik	0	0	-7.64386	-7.64386	0	73475	chr1	89016113	89022210	+	NR_040471	lncRNA	.	RIKEN cDNA 1700067G17 gene
1700067K01Rik	0.260628	0.20382	-1.91252	-2.25967	-0.347147	73453	chr8	84001706	84004770	+	NM_183097	protein_coding	.	RIKEN cDNA 1700067K01 gene
1700067P10Rik	0	0	-7.64386	-7.64386	0	68224	chr17	48089632	48090920	+	NM_026625	protein_coding	.	RIKEN cDNA 1700067P10 gene
1700069L16Rik	0	0	-7.64386	-7.64386	0	381707	chr5	113692424	113724772	-	NR_033216	lncRNA	1700096P12Rik	RIKEN cDNA 1700069L16 gene
1700069P05Rik	0	0	-7.64386	-7.64386	0	73531	chr6	118246695	118248454	-	NR_040527	lncRNA	.	RIKEN cDNA 1700069P05 gene
1700071K01Rik	0	0	-7.64386	-7.64386	0	237880	chr11	81572502	81573539	-	NM_001033765	protein_coding	.	RIKEN cDNA 1700071K01 gene
1700071M16Rik	0.409245	0.614715	-1.27144	-0.690323	0.581121	73504	chr17	43588340	43591509	-	NR_045445	lncRNA	.	RIKEN cDNA 1700071M16 gene
1700072B07Rik	0	0	-7.64386	-7.64386	0	73529	chr9	58370504	58374183	+	NR_040727	lncRNA	.	RIKEN cDNA 1700072B07 gene
1700072I22Rik	0	0	-7.64386	-7.64386	0	78629	chr11	103638936	103649013	+	NR_131143	lncRNA	.	RIKEN cDNA 1700072I22 gene
1700072O05Rik	0	0	-7.64386	-7.64386	0	73505	chr6	120554796	120574204	+	NR_045733	lncRNA	.	RIKEN cDNA 1700072O05 gene
1700073E17Rik	0	0	-7.64386	-7.64386	0	381827	chr6	145387625	145392223	+	NR_003625	misc_RNA	.	RIKEN cDNA 1700073E17 gene
1700074H08Rik	0	0	-7.64386	-7.64386	0	73480	chr13	119680042	119681582	+	NR_045296	lncRNA	CH25-211A23.1	RIKEN cDNA 1700074H08 gene
1700074P13Rik	0	0	-7.64386	-7.64386	0	73481	chr6	40920460	40940557	-	NM_028550	protein_coding	AV047902| Tryx5	RIKEN cDNA 1700074P13 gene
1700080E11Rik	0	0	-7.64386	-7.64386	0	73532	chr9	105143344	105145082	-	NM_028562	protein_coding	AI429110| Tseg8	RIKEN cDNA 1700080E11 gene
1700080N15Rik	0	0	-7.64386	-7.64386	0	73489	chr2	4132065	4141141	-	NR_040500	lncRNA	4933408D14Rik	RIKEN cDNA 1700080N15 gene
1700080O16Rik	0	0	-7.64386	-7.64386	0	74279	chrX	51968695	51972772	-	NM_028851	protein_coding	.	RIKEN cDNA 1700080O16 gene
1700081H04Rik	0	0	-7.64386	-7.64386	0	73477	chr5	119108236	119114543	+	NR_040693	lncRNA	.	RIKEN cDNA 1700081H04 gene
1700084C01Rik	0.0370845	0	-4.57057	-7.64386	-3.07329	.	chr1	169928939	169934653	+	NM_001033185	.	.	.
1700084D21Rik	0	0	-7.64386	-7.64386	0	76720	chr13	113136076	113144012	+	NR_131045	lncRNA	.	RIKEN cDNA 1700084D21 gene
1700084E18Rik	1.98895	0.797254	0.995629	-0.317869	-1.3135	67350	chr2	30237198	30237631	-	NR_028299	lncRNA	.	RIKEN cDNA 1700084E18 gene
1700084F23Rik	0	0	-7.64386	-7.64386	0	74280	chr13	70004050	70028348	-	NR_045965	lncRNA	1700003E18Rik| 4930589D02Rik	RIKEN cDNA 1700084F23 gene
1700084J12Rik	0	0.171553	-7.64386	-2.50183	5.14203	73486	chr15	33405209	33405939	-	NR_033608	misc_RNA	.	RIKEN cDNA 1700084J12 gene
1700084M14Rik	0	0	-7.64386	-7.64386	0	73487	chrX	91575211	91575911	-	NR_126536	misc_RNA	.	RIKEN cDNA 1700084M14 gene
1700085C21Rik	0	0	-7.64386	-7.64386	0	74283	chr12	82932520	82939155	-	NR_046045	lncRNA	.	RIKEN cDNA 1700085C21 gene
1700086L19Rik	0	0	-7.64386	-7.64386	0	74284	chr12	74284276	74295950	+	NR_030735	lncRNA	1700006L05Rik| AU016007	RIKEN cDNA 1700086L19 gene
1700086O06Rik	1.33948	2.16785	0.427048	1.11959	0.69254	73516	chr18	38238405	38250565	-	NR_027903	lncRNA	.	RIKEN cDNA 1700086O06 gene
1700088E04Rik	6.11936	9.38592	2.61456	3.23127	0.616707	27660	chr15	79134655	79141251	-	NM_138581	protein_coding	ESTJ0827E04	RIKEN cDNA 1700088E04 gene
1700091H14Rik	0.387164	0.113266	-1.35047	-3.07989	-1.72942	73553	chr14	42089750	42095277	-	NR_073362	lncRNA	100041930| Gm3578	RIKEN cDNA 1700091H14 gene
1700092C02Rik	0	0	-7.64386	-7.64386	0	67357	chr8	77624172	77628956	+	NR_045467	lncRNA	.	RIKEN cDNA 1700092C02 gene
1700092C10Rik	0	0	-7.64386	-7.64386	0	73554	chr14	69164799	69171843	-	NR_045931	lncRNA	.	RIKEN cDNA 1700092C10 gene
1700092E19Rik	0	0	-7.64386	-7.64386	0	73576	chr13	26283159	26312406	-	NR_045933	lncRNA	.	RIKEN cDNA 1700092E19 gene
1700092K14Rik	0	0	-7.64386	-7.64386	0	73536	chr11	114198258	114199199	+	NR_045930	lncRNA	.	RIKEN cDNA 1700092K14 gene
1700092M07Rik	0.769377	2.32992	-0.368892	1.22337	1.59227	74307	chr19	8740718	8741225	+	NM_001177347	protein_coding	.	RIKEN cDNA 1700092M07 gene
1700093K21Rik	0.0574954	0	-4.00011	-7.64386	-3.64375	67358	chr11	23516203	23519942	-	NM_001110133	protein_coding	.	RIKEN cDNA 1700093K21 gene
1700094D03Rik	1.63021	1.44487	0.709476	0.535924	-0.173552	73545	chr3	90062796	90068347	+	NM_028567	protein_coding	.	RIKEN cDNA 1700094D03 gene
1700094J05Rik	0.520746	0.509581	-0.927562	-0.95853	-0.0309678	67523	chr10	76389015	76401507	+	NR_040580	lncRNA	.	RIKEN cDNA 1700094J05 gene
1700094M24Rik	0	0	-7.64386	-7.64386	0	74304	chr6	52492451	52500085	+	NR_046049	lncRNA	.	RIKEN cDNA 1700094M24 gene
1700095A21Rik	0	0	-7.64386	-7.64386	0	67524	chr4	146519039	146546873	-	NR_045468	lncRNA	.	RIKEN cDNA 1700095A21 gene
1700095B10Rik	0	0	-7.64386	-7.64386	0	67360	chr5	112793292	112801701	+	NR_040675	lncRNA	.	RIKEN cDNA 1700095B10 gene
1700095J12Rik	0	0	-7.64386	-7.64386	0	73563	chr4	138137580	138138518	-	NR_126429	lncRNA	.	RIKEN cDNA 1700095J12 gene
1700096J18Rik	0	0	-7.64386	-7.64386	0	67927	chr11	109346867	109353651	+	NR_027883	lncRNA	.	RIKEN cDNA 1700096J18 gene
1700096K18Rik	0.478608	0.861358	-1.04809	-0.206965	0.841125	73571	chr5	25530018	25531466	+	NR_027388	lncRNA	.	RIKEN cDNA 1700096K18 gene
1700096P03Rik	0	0	-7.64386	-7.64386	0	73557	chr8	87636098	87642210	-	NR_131165	lncRNA	.	RIKEN cDNA 1700096P03 gene
1700097N02Rik	0	0	-7.64386	-7.64386	0	67522	chr17	30622441	30626905	-	NR_045287	lncRNA	.	RIKEN cDNA 1700097N02 gene
1700099I09Rik	0.0971864	0.19156	-3.29072	-2.34696	0.943767	76624	chr13	102760255	102761896	+	NR_130318	lncRNA	.	RIKEN cDNA 1700099I09 gene
1700100I10Rik	0.0724143	0	-3.69126	-7.64386	-3.9526	74982	chr14	114940225	114945948	-	NR_126551	lncRNA	1700085D13Rik| 4930481K08Rik	RIKEN cDNA 1700100I10 gene
1700100L14Rik	0	0	-7.64386	-7.64386	0	73584	chr13	70573241	70576104	+	NR_045934	lncRNA	.	RIKEN cDNA 1700100L14 gene
1700101E01Rik	0	0	-7.64386	-7.64386	0	.	chr2	28955481	29055066	-	NM_001166705	.	.	.
1700101I11Rik	0	0.0749019	-7.64386	-3.64563	3.99823	100504641	chr6	129532184	129533284	-	NR_045270	lncRNA	.	RIKEN cDNA 1700101I11 gene
1700101O22Rik	0	0	-7.64386	-7.64386	0	73575	chr12	7372039	7380330	-	NR_045045	lncRNA	.	RIKEN cDNA 1700101O22 gene
1700102H20Rik	0	0.693147	-7.64386	-0.518397	7.12546	68230	chr17	3557824	3559863	+	NR_045302	lncRNA	.	RIKEN cDNA 1700102H20 gene
1700102P08Rik	0.307843	0.300886	-1.67649	-1.70893	-0.0324447	112418	chr9	108392834	108397767	+	NM_053216	protein_coding	AI593206	RIKEN cDNA 1700102P08 gene
1700104L18Rik	0	0	-7.64386	-7.64386	0	73592	chr12	54233615	54242320	+	NR_108033	lncRNA	.	RIKEN cDNA 1700104L18 gene
1700105P06Rik	0	0.129934	-7.64386	-2.88967	4.75418	654802	chr19	7383003	7383557	+	NR_045703	lncRNA	.	RIKEN cDNA 1700105P06 gene
1700106J16Rik	0	0	-7.64386	-7.64386	0	.	chr11	88294043	88295261	+	NM_028859	.	.	.
1700108F19Rik	0.20742	0.271185	-2.23501	-1.85629	0.378715	73272	chr14	76677568	76687108	+	NR_015485	lncRNA	1700020I02Rik| BB065030	RIKEN cDNA 1700108F19 gene
1700108J01Rik	0	0	-7.64386	-7.64386	0	68245	chr14	122229905	122233638	-	NR_015532	lncRNA	.	RIKEN cDNA 1700108J01 gene
1700109G14Rik	0	0	-7.64386	-7.64386	0	67355	chr14	61292983	61305334	-	NR_033788	lncRNA	1700126G13Rik	RIKEN cDNA 1700109G14 gene
1700109G15Rik	0	0	-7.64386	-7.64386	0	78471	chr11	84716976	84720432	-	NR_046197	lncRNA	.	RIKEN cDNA 1700109G15 gene
1700109H08Rik	0	0	-7.64386	-7.64386	0	77036	chr5	3571716	3584341	+	NM_029843	protein_coding	.	RIKEN cDNA 1700109H08 gene
1700109I08Rik	0	0	-7.64386	-7.64386	0	73591	chr14	39655663	39685293	+	NR_045936	lncRNA	.	RIKEN cDNA 1700109I08 gene
1700109K24Rik	1.24274	0.708483	0.319317	-0.487049	-0.806366	74303	chr15	77084398	77096314	+	NR_108037	lncRNA	4933425G21Rik	RIKEN cDNA 1700109K24 gene
1700110C19Rik	0.0887116	0	-3.41563	-7.64386	-4.22823	76634	chr17	10324602	10329312	+	NR_045461	lncRNA	.	RIKEN cDNA 1700110C19 gene
1700110I01Rik	0	0	-7.64386	-7.64386	0	73549	chr14	3262402	3783730	+	NR_038059	lncRNA	100040740| 1700016F01Rik| Gm2938	RIKEN cDNA 1700110I01 gene
1700110I07Rik	0	0	-7.64386	-7.64386	0	77001	chr7	41060617	41089843	-	NR_131068	lncRNA	.	RIKEN cDNA 1700110I07 gene
1700110K17Rik	0.0911859	0.179544	-3.37803	-2.43796	0.940068	73558	chr9	40333472	40343337	+	NR_040728	lncRNA	.	RIKEN cDNA 1700110K17 gene
1700111N16Rik	0	0	-7.64386	-7.64386	0	74305	chrX	69929260	70143588	-	NR_033213	lncRNA	.	RIKEN cDNA 1700111N16 gene
1700112E06Rik	0.129843	0	-2.89065	-7.64386	-4.75321	76633	chr14	22019712	23056088	+	NM_028275	protein_coding	2700009F18Rik	RIKEN cDNA 1700112E06 gene
1700112H15Rik	0	0	-7.64386	-7.64386	0	73590	chr1	184527841	184557691	-	NR_040472	lncRNA	.	RIKEN cDNA 1700112H15 gene
1700112J05Rik	0.385293	0	-1.35737	-7.64386	-6.28649	68246	chr5	77006442	77018863	-	NR_077218	lncRNA	1700110A09Rik	RIKEN cDNA 1700112J05 gene
1700112J16Rik	0	0	-7.64386	-7.64386	0	76628	chr7	67204082	67222536	-	NR_131044	lncRNA	.	RIKEN cDNA 1700112J16 gene
1700113A16Rik	4.83009	3.805	2.27354	1.92979	-0.343752	76642	chr3	88171560	88177785	-	NR_045997	lncRNA	2210408E11Rik| AA408983	RIKEN cDNA 1700113A16 gene
1700113B09Rik	0	0	-7.64386	-7.64386	0	78638	chr10	71201745	71204488	+	NR_131003	lncRNA	.	RIKEN cDNA 1700113B09 gene
1700113H08Rik	0	0	-7.64386	-7.64386	0	76640	chr10	87058046	87230599	+	NM_029685	protein_coding	.	RIKEN cDNA 1700113H08 gene
1700116B05Rik	0	0	-7.64386	-7.64386	0	78639	chr16	50783409	50784091	+	NR_131005	lncRNA	.	RIKEN cDNA 1700116B05 gene
1700119H24Rik	0	0	-7.64386	-7.64386	0	76649	chr16	34935855	34939329	-	NR_040536	lncRNA	.	RIKEN cDNA 1700119H24 gene
1700120C14Rik	1.23026	0.248074	0.304815	-1.98237	-2.28718	73600	chr15	99251788	99262041	+	NR_045627	lncRNA	.	RIKEN cDNA 1700120C14 gene
1700120E14Rik	0.0265119	0	-4.98796	-7.64386	-2.6559	73606	chr18	74495678	74525876	-	NR_045368	lncRNA	.	RIKEN cDNA 1700120E14 gene
1700120G07Rik	0	0	-7.64386	-7.64386	0	74314	chr7	135191765	135196002	-	NR_046050	lncRNA	.	RIKEN cDNA 1700120G07 gene
1700120K04Rik	0.407045	0.403898	-1.27913	-1.29019	-0.0110609	68232	chr7	127603903	127604445	-	NR_027915	lncRNA	.	RIKEN cDNA 1700120K04 gene
1700121L16Rik	0	0	-7.64386	-7.64386	0	76643	chrX	104816776	104842455	+	NR_045453	lncRNA	.	RIKEN cDNA 1700121L16 gene
1700121N20Rik	0	0	-7.64386	-7.64386	0	76639	chr12	106442652	106447666	-	NR_036593	lncRNA	.	RIKEN cDNA 1700121N20 gene
1700122C19Rik	0	0	-7.64386	-7.64386	0	78640	chr19	37465254	37471827	+	NR_131009	lncRNA	.	RIKEN cDNA 1700122C19 gene
1700122O11Rik	0	0	-7.64386	-7.64386	0	76651	chr17	48036745	48038293	-	NM_029689	protein_coding	.	RIKEN cDNA 1700122O11 gene
1700123I01Rik	0	0	-7.64386	-7.64386	0	.	chr19	6184410	6224219	+	NM_001165919	.	.	.
1700123J17Rik	0	0	-7.64386	-7.64386	0	76728	chr7	126224247	126248238	-	NR_131047	lncRNA	.	RIKEN cDNA 1700123J17 gene
1700123K08Rik	0	0	-7.64386	-7.64386	0	76658	chr5	138561840	138564694	-	NM_029693	protein_coding	.	RIKEN cDNA 1700123K08 gene
1700123L14Rik	0	0	-7.64386	-7.64386	0	78482	chr6	96164503	96166205	-	NR_003643	misc_RNA	.	RIKEN cDNA 1700123L14 gene
1700123M08Rik	0.319302	0.572354	-1.62459	-0.792472	0.832118	100503636	chr4	11966574	11994295	+	NR_040577	lncRNA	1600025K15Rik	RIKEN cDNA 1700123M08 gene
1700123O12Rik	0	0	-7.64386	-7.64386	0	73624	chr4	10508031	10797802	-	NR_045185	lncRNA	.	RIKEN cDNA 1700123O12 gene
1700123O20Rik	14.356	16.9341	3.84408	4.08229	0.238201	58248	chr14	54686171	54690742	+	NM_021437	protein_coding	MNCb-2990	RIKEN cDNA 1700123O20 gene
1700123O21Rik	0	0	-7.64386	-7.64386	0	68238	chr16	5975587	5998496	+	NR_045799	lncRNA	.	RIKEN cDNA 1700123O21 gene
1700124L16Rik	0.622996	1.2649	-0.671173	0.344715	1.01589	67934	chr6	83761759	83762508	-	NR_105027	lncRNA	.	RIKEN cDNA 1700124L16 gene
1700125G02Rik	0	0	-7.64386	-7.64386	0	73628	chr4	124890888	124894782	-	NR_040651	lncRNA	.	RIKEN cDNA 1700125G02 gene
1700125G22Rik	0	0	-7.64386	-7.64386	0	76657	chr3	27154026	27157019	+	NR_040548	lncRNA	.	RIKEN cDNA 1700125G22 gene
1700125H03Rik	0	0	-7.64386	-7.64386	0	73609	chr8	68368459	68375710	+	NR_038181	lncRNA	4930510D22Rik	RIKEN cDNA 1700125H03 gene
1700125H20Rik	0.17855	0.466064	-2.44575	-1.08601	1.35975	73634	chr11	85171096	85181154	+	NM_028589	protein_coding	.	RIKEN cDNA 1700125H20 gene
1700126H18Rik	0	0	-7.64386	-7.64386	0	73639	chr5	66166607	66191335	-	NR_040695	lncRNA	.	RIKEN cDNA 1700126H18 gene
1700128A07Rik	0	0	-7.64386	-7.64386	0	73631	chr14	106417187	106486520	-	NR_045938	lncRNA	.	RIKEN cDNA 1700128A07 gene
1700128F08Rik	0	0	-7.64386	-7.64386	0	76669	chr9	8221889	8241987	+	NR_033618	misc_RNA	.	RIKEN cDNA 1700128F08 gene
1700129C05Rik	0	0	-7.64386	-7.64386	0	67932	chr14	59133040	59142893	-	NM_026461	protein_coding	.	RIKEN cDNA 1700129C05 gene
1810006J02Rik	0	0	-7.64386	-7.64386	0	69030	chr1	98131467	98144655	+	NR_040439	lncRNA	.	RIKEN cDNA 1810006J02 gene
1810007C17Rik	0.0911859	0	-3.37803	-7.64386	-4.26583	69054	chr12	49476993	49480862	-	NR_045472	lncRNA	.	RIKEN cDNA 1810007C17 gene
1810007D17Rik	0	0	-7.64386	-7.64386	0	69055	chr19	58606329	58629753	+	NR_038136	lncRNA	.	RIKEN cDNA 1810007D17 gene
1810008I18Rik	0.755055	2.88214	-0.395824	1.52964	1.92547	100503969	chr7	65804052	65806223	+	NR_045301	lncRNA	.	RIKEN cDNA 1810008I18 gene
1810009A15Rik	183.486	169.774	7.51957	7.40751	-0.112051	66276	chr19	8888883	8888964	+	NM_025463	protein_coding	.	RIKEN cDNA 1810009A15 gene
1810009J06Rik	0	0	-7.64386	-7.64386	0	73626	chr6	40964772	40968427	+	NM_023707	protein_coding	.	RIKEN cDNA 1810009J06 gene
1810010D01Rik	0.439483	0	-1.1698	-7.64386	-6.47406	100040049	chr7	145205818	145208119	-	NR_033626	lncRNA	100040049| Gm2572	RIKEN cDNA 1810010D01 gene
1810010H24Rik	0.1025	0.651183	-3.21759	-0.60783	2.60976	69066	chr11	107028223	107030442	+	NM_001163473	protein_coding	OTTMUSG00000003581	RIKEN cDNA 1810010H24 gene
1810011H11Rik	0	0	-7.64386	-7.64386	0	69069	chr14	32785963	32817968	+	NM_001163616	protein_coding	4733401I05Rik	RIKEN cDNA 1810011H11 gene
1810011O10Rik	9.96622	30.1193	3.31777	4.91286	1.59509	69068	chr8	24437616	24438946	-	NM_026931	protein_coding	1110065B09Rik| AW121743| AW321058	RIKEN cDNA 1810011O10 gene
1810012K16Rik	0	0	-7.64386	-7.64386	0	69108	chr8	22398721	22399591	+	NR_045473	lncRNA	.	RIKEN cDNA 1810012K16 gene
1810013A23Rik	0	0.430151	-7.64386	-1.20041	6.44344	69050	chr17	28271708	28273163	+	NR_045427	lncRNA	.	RIKEN cDNA 1810013A23 gene
1810013L24Rik	9.99575	12.9839	3.32204	3.69921	0.377171	69053	chr16	8830100	8858924	+	NM_001081400	protein_coding	1110017P05Rik| 3010002C02Rik| AA792997| AW124177| Gm19906| R74903	RIKEN cDNA 1810013L24 gene
1810014B01Rik	1.90941	2.11207	0.9369	1.08207	0.145169	66263	chr10	86685527	86689954	+	NR_015572	misc_RNA	.	RIKEN cDNA 1810014B01 gene
1810018F18Rik	0	0	-7.64386	-7.64386	0	69166	chr19	58698917	58701323	+	NR_038140	lncRNA	1810031L05Rik| 1810047O18Rik	RIKEN cDNA 1810018F18 gene
1810019D21Rik	2.67924	1.98147	1.42451	0.990207	-0.434307	69771	chr8	106135400	106138722	+	NR_040346	lncRNA	.	RIKEN cDNA 1810019D21 gene
1810020O05Rik	0.544196	1.33049	-0.864607	0.417369	1.28198	613264	chr6	87675593	87690847	-	NR_045482	lncRNA	.	Riken cDNA 1810020O05 gene
1810021B22Rik	0.40869	0.50394	-1.27338	-0.974433	0.298945	69120	chr15	89071198	89075854	-	NR_040417	lncRNA	.	RIKEN cDNA 1810021B22 gene
1810022K09Rik	165.202	208.973	7.36813	7.70721	0.339076	69126	chr3	14606289	14611256	-	NM_001099674	protein_coding	AI746582| AL023036	RIKEN cDNA 1810022K09 gene
1810024B03Rik	0.0431735	0.0421358	-4.37562	-4.40703	-0.0314165	329509	chr2	127186355	127208280	-	NM_198630	protein_coding	.	RIKEN cDNA 1810024B03 gene
1810026B05Rik	1.51824	2.01764	0.607143	1.01624	0.409096	69170	chr7	73539798	73558395	-	NR_037569	lncRNA	.	RIKEN cDNA 1810026B05 gene
1810026J23Rik	8.9846	9.75937	3.16826	3.28753	0.11927	69773	chr9	21592722	21595970	+	NM_178619	protein_coding	.	RIKEN cDNA 1810026J23 gene
1810030O07Rik	18.8562	18.6812	4.23735	4.2239	-0.0134483	69155	chrX	12654884	12673546	-	NM_175141	protein_coding	.	RIKEN cDNA 1810030O07 gene
1810032O08Rik	10.5278	8.77939	3.39682	3.13494	-0.261875	66293	chr11	116671660	116675798	+	NR_027821	lncRNA	.	RIKEN cDNA 1810032O08 gene
1810034E14Rik	0.344061	0.223276	-1.51845	-2.13115	-0.6127	66503	chr13	64248700	64268145	+	NR_045798	lncRNA	.	RIKEN cDNA 1810034E14 gene
1810037I17Rik	46.7787	47.8833	5.54793	5.5816	0.0336673	67704	chr3	122924397	122926194	+	NM_024461	protein_coding	5730414I01Rik	RIKEN cDNA 1810037I17 gene
1810041H14Rik	0.437832	0	-1.17517	-7.64386	-6.46869	78312	chr14	121876861	121879408	-	NR_130999	lncRNA	.	RIKEN cDNA 1810041H14 gene
1810041L15Rik	0.128187	0.170935	-2.90847	-2.50689	0.401589	72301	chr15	84379203	84447097	-	NM_001163145	protein_coding	Kiaa1644	RIKEN cDNA 1810041L15 gene
1810043G02Rik	9.21355	8.01492	3.20454	3.00359	-0.200952	67884	chr10	77978650	77985438	+	NM_026431	protein_coding	AV026620| D10Jhu13e	RIKEN cDNA 1810043G02 gene
1810043H04Rik	24.4034	31.8823	4.60931	4.99491	0.385604	208501	chr11	120098934	120100424	+	NM_001110242	protein_coding	.	RIKEN cDNA 1810043H04 gene
1810044D09Rik	1.30327	2.11088	0.38766	1.08126	0.693597	69798	chr6	91440987	91441755	+	NR_038153	lncRNA	.	RIKEN cDNA 1810044D09 gene
1810046K07Rik	0	0	-7.64386	-7.64386	0	69809	chr9	51289686	51328917	-	NM_027217	protein_coding	.	RIKEN cDNA 1810046K07 gene
1810053B23Rik	0	0.343216	-7.64386	-1.52195	6.12191	69857	chr16	93343716	93359543	-	NR_040488	lncRNA	1810008L18Rik| 1810056K14Rik	RIKEN cDNA 1810053B23 gene
1810055G02Rik	37.4051	37.0128	5.22536	5.21015	-0.0152087	72056	chr19	3708333	3717881	+	NM_028077	protein_coding	AI256204	RIKEN cDNA 1810055G02 gene
1810058I24Rik	13.7516	16.3814	3.78205	4.03443	0.252375	67705	chr6	35252699	35262059	+	NR_015608	lncRNA	AI414869| AI848234	RIKEN cDNA 1810058I24 gene
1810062G17Rik	0.129843	0.826941	-2.89065	-0.265447	2.6252	72282	chr3	36475937	36482299	+	NM_028183	protein_coding	.	RIKEN cDNA 1810062G17 gene
1810062O18Rik	0	0	-7.64386	-7.64386	0	75602	chr14	20546293	20570680	+	NR_033571	lncRNA	.	RIKEN cDNA 1810062O18 gene
1810063I02Rik	0	0	-7.64386	-7.64386	0	69854	chr11	59921499	59921889	+	NR_130986	lncRNA	.	RIKEN cDNA 1810063I02 gene
1810064F22Rik	0.0218313	0.0424496	-5.21994	-4.39746	0.822479	69862	chr9	22206786	22213860	-	NR_027981	lncRNA	.	RIKEN cDNA 1810064F22 gene
1810065E05Rik	0	0	-7.64386	-7.64386	0	69864	chr11	58421111	58426023	+	NM_027239	protein_coding	AV047390| RP23-465K20.5	RIKEN cDNA 1810065E05 gene
2010001A14Rik	2.29691	2.49942	1.20283	1.32448	0.121645	76516	chr11	57795499	57801467	-	NR_131042	lncRNA	.	RIKEN cDNA 2010001A14 gene
2010001E11Rik	0.0660294	0.0641971	-3.81544	-3.85314	-0.0377047	.	chr10	39920382	39926923	-	NM_001163503	.	.	.
2010003K11Rik	0.0952447	0	-3.3184	-7.64386	-4.32545	69861	chr19	4496788	4498583	-	NM_027237	protein_coding	.	RIKEN cDNA 2010003K11 gene
2010005H15Rik	0	0	-7.64386	-7.64386	0	76770	chr16	36221562	36257427	+	NM_029733	protein_coding	.	RIKEN cDNA 2010005H15 gene
2010009K17Rik	0.126034	0	-2.93199	-7.64386	-4.71187	72340	chr2	158070364	158091797	-	NR_040609	lncRNA	.	RIKEN cDNA 2010009K17 gene
2010010A06Rik	0	0	-7.64386	-7.64386	0	100503117	chr18	75288660	75297317	-	NR_045394	lncRNA	5033420E22Rik	RIKEN cDNA 2010010A06 gene
2010012O05Rik	2.48537	1.87482	1.31636	0.910595	-0.405766	.	chr19	46689906	46703382	+	NM_025563	.	.	.
2010016I18Rik	0.304631	0.362766	-1.69138	-1.44314	0.248238	69206	chr3	106481986	106485913	-	NR_033207	lncRNA	.	RIKEN cDNA 2010016I18 gene
2010106C02Rik	0	0	-7.64386	-7.64386	0	72104	chr17	86285167	86287178	-	NR_045435	lncRNA	.	RIKEN cDNA 2010106C02 gene
2010106E10Rik	0	0	-7.64386	-7.64386	0	67715	chrX	112495274	112558343	+	NM_026333	protein_coding	RP23-336F13.4	RIKEN cDNA 2010106E10 gene
2010107E04Rik	167.561	163.07	7.38859	7.34939	-0.0391938	70257	chr12	111961376	111966977	-	NM_027360	protein_coding	9430003J03Rik| AU043134| AV124504| Mp68	RIKEN cDNA 2010107E04 gene
2010107G12Rik	0.421956	0.501541	-1.22784	-0.981249	0.246592	243753	chr6	34945295	34977999	-	NM_001025573	protein_coding	Gm468	RIKEN cDNA 2010107G12 gene
2010107G23Rik	0.240055	0.818053	-2.02882	-0.280943	1.74788	69894	chr10	62107656	62111013	-	NM_027251	protein_coding	AA545165	RIKEN cDNA 2010107G23 gene
2010109A12Rik	0	0.132635	-7.64386	-2.86108	4.78278	75610	chr5	93206518	93213474	+	NM_029363	protein_coding	.	RIKEN cDNA 2010109A12 gene
2010109I03Rik	0	0.132456	-7.64386	-2.86296	4.7809	67038	chr15	74878336	74881704	-	NM_025929	protein_coding	.	RIKEN cDNA 2010109I03 gene
2010111I01Rik	7.45459	4.08595	2.8991	2.03244	-0.86666	72061	chr13	62964893	63326096	+	NM_001289924	protein_coding	2300006M17Rik| Aopep| AP-O| ApO| AW742919| mir-23b| mir-24-1| mir-27b	RIKEN cDNA 2010111I01 gene
2010204K13Rik	25.2127	25.3413	4.65636	4.6637	0.00733846	68355	chrX	7411817	7422988	-	NR_027924	lncRNA	0610010M13Rik| Cip7	RIKEN cDNA 2010204K13 gene
2010300C02Rik	1.13425	0.705238	0.188084	-0.493626	-0.68171	72097	chr1	37611676	37719811	-	NM_028096	protein_coding	.	RIKEN cDNA 2010300C02 gene
2010308F09Rik	0.171294	0	-2.50394	-7.64386	-5.13991	72122	chrX	13234641	13247733	-	NR_045430	lncRNA	.	RIKEN cDNA 2010308F09 gene
2010310C07Rik	0	0	-7.64386	-7.64386	0	72131	chr6	42370671	42380558	+	NR_045169	lncRNA	.	RIKEN cDNA 2010310C07 gene
2010315B03Rik	1.6518	2.15524	0.728399	1.11119	0.382792	630836	chr9	124291804	124312694	-	NM_001243117	protein_coding	BC029716	RIKEN cDNA 2010315B03 gene
2010320M18Rik	7.72819	7.93378	2.95106	2.98892	0.0378537	72093	chr8	70776862	70777606	+	NR_029440	lncRNA	.	RIKEN cDNA 2010320M18 gene
2200002D01Rik	264.302	229.148	8.04607	7.84017	-0.205903	72275	chr7	29247521	29248467	-	NM_028179	protein_coding	2010005J02Rik| H2RSP| IMUP| IMUP-1| IMUP-2	RIKEN cDNA 2200002D01 gene
2200002J24Rik	0	0.335905	-7.64386	-1.55256	6.0913	69147	chr7	30698926	30700534	+	NM_026961	protein_coding	.	RIKEN cDNA 2200002J24 gene
2210010C04Rik	0	0	-7.64386	-7.64386	0	67373	chr6	41030268	41035509	-	NM_023333	protein_coding	AV072249	RIKEN cDNA 2210010C04 gene
2210011C24Rik	2.28522	1.91935	1.19549	0.944371	-0.251115	70134	chr8	84010228	84011720	-	NM_001291292	protein_coding	.	RIKEN cDNA 2210011C24 gene
2210013O21Rik	10.4217	10.2906	3.38221	3.36396	-0.0182547	70123	chrX	153723554	153741296	+	NM_027327	protein_coding	AI181827| Thp5	RIKEN cDNA 2210013O21 gene
2210015D19Rik	2.38041	2.86201	1.25424	1.51955	0.26531	.	chr11	5762150	5784710	+	NR_015577	.	.	.
2210016F16Rik	12.6462	15.6327	3.6612	3.96696	0.305754	70153	chr13	58380046	58385225	-	NM_027335	protein_coding	.	RIKEN cDNA 2210016F16 gene
2210016L21Rik	26.5789	33.1443	4.73248	5.05091	0.318426	72357	chr5	114942202	114948540	+	NM_028211	protein_coding	.	RIKEN cDNA 2210016L21 gene
2210018M11Rik	10.3816	10.845	3.37665	3.43962	0.0629716	.	chr7	98590606	98656569	-	NM_172280	.	.	.
2210019I11Rik	0.0370245	0.0360946	-4.57263	-4.60491	-0.0322818	70147	chr5	147228598	147271521	-	NR_038157	lncRNA	.	RIKEN cDNA 2210019I11 gene
2210039B01Rik	1.64827	0.644832	0.725322	-0.621861	-1.34718	73644	chr12	73548483	73551986	+	NR_044985	lncRNA	.	RIKEN cDNA 2210039B01 gene
2210404E10Rik	0	0.120131	-7.64386	-2.99849	4.64537	72305	chr19	10684793	10685556	+	NR_131163	lncRNA	.	RIKEN cDNA 2210404E10 gene
2210404O09Rik	3.22467	3.68762	1.69139	1.88464	0.193258	70081	chr17	21879570	21909926	-	NM_001256493	protein_coding	.	RIKEN cDNA 2210404O09 gene
2210406O10Rik	0.677199	0.496882	-0.551735	-0.99458	-0.442844	76710	chr5	36447611	36464854	-	NR_126488	lncRNA	.	RIKEN cDNA 2210406O10 gene
2210407C18Rik	0	0	-7.64386	-7.64386	0	78354	chr11	58608206	58613492	-	NM_144544	protein_coding	Ep1| RP23-128D9.4	RIKEN cDNA 2210407C18 gene
2210408F21Rik	0.58057	0.579594	-0.772086	-0.774493	-0.00240662	73652	chr6	31220351	31337394	+	NR_040262	lncRNA	.	RIKEN cDNA 2210408F21 gene
2210408I21Rik	0.887642	0.958382	-0.163846	-0.0538201	0.110026	72371	chr13	77135536	77613679	+	NM_001145676	protein_coding	.	RIKEN cDNA 2210408I21 gene
2210409D07Rik	0	0.180462	-7.64386	-2.4308	5.21305	70157	chr18	57632079	57638585	-	NR_045360	lncRNA	.	RIKEN cDNA 2210409D07 gene
2210409E12Rik	0	0	-7.64386	-7.64386	0	72381	chr11	88972638	88973014	+	NR_003492	misc_RNA	AU021711| C76890| OTTMUSG00000001303	RIKEN cDNA 2210409E12 gene
2210414B05Rik	0	0	-7.64386	-7.64386	0	70143	chr4	3656506	3663108	+	NR_040643	lncRNA	.	RIKEN cDNA 2210414B05 gene
2210416O15Rik	0.744994	0.553152	-0.415049	-0.84127	-0.426221	70393	chr11	88098058	88100107	+	NR_045499	lncRNA	.	RIKEN cDNA 2210416O15 gene
2210417A02Rik	0.930591	1.31852	-0.0960501	0.40438	0.50043	70138	chr5	148741840	148743139	+	NR_028285	lncRNA	AV081004	RIKEN cDNA 2210417A02 gene
2210420H20Rik	0	0	-7.64386	-7.64386	0	76961	chr18	82754505	82759039	-	NR_045389	lncRNA	.	RIKEN cDNA 2210420H20 gene
2300002M23Rik	0	0	-7.64386	-7.64386	0	69542	chr17	35567485	35568945	+	NM_175148	protein_coding	emprin| Stg	RIKEN cDNA 2300002M23 gene
2300003K06Rik	0	0	-7.64386	-7.64386	0	100502865	chr11	99837148	99838066	-	NM_001195383	protein_coding	.	RIKEN cDNA 2300003K06 gene
2300005B03Rik	0	0	-7.64386	-7.64386	0	.	chr15	74742839	74746687	-	NM_001081961	.	.	.
2300009A05Rik	5.9537	7.7356	2.575	2.95245	0.377448	69478	chr9	63394447	63399244	-	NM_027090	protein_coding	.	RIKEN cDNA 2300009A05 gene
2310001H17Rik	0.709693	1.57134	-0.484604	0.656579	1.14118	76432	chr6	129232623	129238482	-	NR_040266	lncRNA	AI646108	RIKEN cDNA 2310001H17 gene
2310001K24Rik	0.179869	0	-2.43542	-7.64386	-5.20843	69517	chr2	163472545	163473003	+	NR_028122	lncRNA	.	RIKEN cDNA 2310001K24 gene
2310002D06Rik	0	0	-7.64386	-7.64386	0	69522	chr12	80507206	80517954	+	NR_045490	lncRNA	.	RIKEN cDNA 2310002D06 gene
2310002F09Rik	0.155904	0.189386	-2.63573	-2.363	0.272724	100504720	chr7	43745466	43755936	-	NR_077063	lncRNA	.	RIKEN cDNA 2310002F09 gene
2310002L09Rik	0	0	-7.64386	-7.64386	0	71886	chr4	73939371	73950846	-	NM_027104	protein_coding	2310003M01Rik| AV083437	RIKEN cDNA 2310002L09 gene
2310003N18Rik	0	0.180462	-7.64386	-2.4308	5.21305	71873	chr9	50232523	50233182	-	NR_131161	lncRNA	.	RIKEN cDNA 2310003N18 gene
2310005A03Rik	0	0	-7.64386	-7.64386	0	100504268	chr2	155097791	155100079	-	NR_040634	lncRNA	.	RIKEN cDNA 2310005A03 gene
2310005E17Rik	0	0.0456054	-7.64386	-4.30456	3.33929	70090	chr13	98424110	98435065	-	NR_045498	lncRNA	.	RIKEN cDNA 2310005E17 gene
2310007B03Rik	9.42943	3.85827	3.23794	1.94982	-1.28811	71874	chr1	93151355	93160948	-	NM_001159940	protein_coding	.	RIKEN cDNA 2310007B03 gene
2310008N11Rik	0	0	-7.64386	-7.64386	0	72316	chr8	26814597	26824423	-	NR_045904	lncRNA	.	RIKEN cDNA 2310008N11 gene
2310009A05Rik	7.33943	7.62939	2.87665	2.93251	0.0558624	66364	chr9	73039718	73042775	+	NR_040377	protein_coding	5031420N21Rik	RIKEN cDNA 2310009A05 gene
2310009B15Rik	16.0433	16.8842	4.00435	4.07803	0.0736805	69549	chr1	138851979	138856854	-	NM_001081226	protein_coding	.	RIKEN cDNA 2310009B15 gene
2310010G23Rik	0.605093	0.484212	-0.712899	-1.03147	-0.318569	.	chrX	36814768	36817200	-	NR_131979	.	.	.
2310010J17Rik	1.03126	1.82203	0.051386	0.8695	0.818114	78329	chr7	90124836	90129936	-	NR_046006	lncRNA	.	RIKEN cDNA 2310010J17 gene
2310011J03Rik	24.566	26.0104	4.61888	4.70129	0.0824093	66374	chr10	80318255	80320548	-	NM_025521	protein_coding	AI452186| AW545358	RIKEN cDNA 2310011J03 gene
2310015A10Rik	0.858095	0.79419	-0.212409	-0.32339	-0.110981	69548	chr12	80120546	80132844	-	NR_033514	lncRNA	5330419I17Rik	RIKEN cDNA 2310015A10 gene
2310015D24Rik	0	0	-7.64386	-7.64386	0	70100	chr16	13514131	13520419	-	NR_037997	lncRNA	.	RIKEN cDNA 2310015D24 gene
2310016D03Rik	0	0	-7.64386	-7.64386	0	69566	chr12	30410559	30467358	-	NR_045491	lncRNA	.	RIKEN cDNA 2310016D03 gene
2310020H05Rik	0	0	-7.64386	-7.64386	0	69603	chr13	99076528	99087921	-	NR_045495	lncRNA	.	RIKEN cDNA 2310020H05 gene
2310022A10Rik	9.06735	10.3534	3.18148	3.37273	0.191253	66367	chr7	27553290	27582098	+	NM_175107	protein_coding	.	RIKEN cDNA 2310022A10 gene
2310022B05Rik	15.8473	18.3389	3.98662	4.19723	0.210608	69551	chr8	124635756	124663369	-	NM_175149	protein_coding	.	RIKEN cDNA 2310022B05 gene
2310030A07Rik	0	0	-7.64386	-7.64386	0	75584	chr1	150320681	150346771	-	NR_040603	lncRNA	.	RIKEN cDNA 2310030A07 gene
2310030G06Rik	5.08	7.93408	2.34625	2.98897	0.642724	66952	chr9	50739691	50746521	-	NM_025865	protein_coding	2610024D04Rik| AV017521	RIKEN cDNA 2310030G06 gene
2310033P09Rik	20.6049	19.7682	4.36527	4.30547	-0.0597911	67862	chr11	59208361	59210734	+	NM_024210	protein_coding	Mmtag2	RIKEN cDNA 2310033P09 gene
2310034C09Rik	0	0	-7.64386	-7.64386	0	117172	chr16	88758847	88759789	+	NM_054100	protein_coding	.	RIKEN cDNA 2310034C09 gene
2310034G01Rik	0.471889	0.772526	-1.06827	-0.363037	0.705237	75579	chr19	46348201	46348988	-	NR_040418	lncRNA	.	RIKEN cDNA 2310034G01 gene
2310034O05Rik	0	0	-7.64386	-7.64386	0	69571	chr5	100210692	100218049	+	NR_040679	lncRNA	.	RIKEN cDNA 2310034O05 gene
2310035C23Rik	6.9261	6.81059	2.79308	2.76884	-0.0242458	227446	chr1	105663861	105755131	+	NM_173187	protein_coding	6430401N10| Kiaa1468| mKIAA1468	RIKEN cDNA 2310035C23 gene
2310036O22Rik	140.913	157.928	7.13871	7.30317	0.164457	68544	chr8	85026833	85030286	+	NM_026760	protein_coding	1110002H14Rik| AI854688	RIKEN cDNA 2310036O22 gene
2310039H08Rik	13.7241	13.6443	3.77917	3.77076	-0.00841009	67101	chr17	46772635	46773407	+	NM_025966	protein_coding	.	RIKEN cDNA 2310039H08 gene
2310039L15Rik	0.734871	0.103611	-0.434654	-3.20276	-2.7681	69629	chr10	95336276	95363216	+	NR_045337	lncRNA	.	RIKEN cDNA 2310039L15 gene
2310040G24Rik	0.903188	1.56004	-0.138937	0.6462	0.785137	381792	chr6	86483376	86488227	-	NR_040293	lncRNA	.	RIKEN cDNA 2310040G24 gene
2310043L19Rik	0	0	-7.64386	-7.64386	0	75589	chr1	177641542	177642943	-	NR_037994	lncRNA	.	RIKEN cDNA 2310043L19 gene
2310043O21Rik	0	0	-7.64386	-7.64386	0	69679	chr15	38549344	38594934	-	NR_045757	lncRNA	.	RIKEN cDNA 2310043O21 gene
2310045N01Rik	12.307	15.1604	3.62199	3.92271	0.300718	.	chr8	70139499	70148634	+	NM_001145552	.	.	.
2310045n01rik-mef2b	0	0	-7.64386	-7.64386	0	105980076	chr8	70139499	70139772	+	NM_001310055	protein_coding	.	2310045N01Rik-mef2b readthrough
2310047M10Rik	6.42247	10.9685	2.68425	3.45595	0.771701	.	chr11	69059775	69061576	+	NM_028005	.	.	.
2310050C09Rik	0	0	-7.64386	-7.64386	0	66533	chr3	92868359	92870205	-	NM_025621	protein_coding	.	RIKEN cDNA 2310050C09 gene
2310057J18Rik	0	0	-7.64386	-7.64386	0	67719	chr10	28972288	28986306	-	NM_026336	protein_coding	2210414P04Rik| Leg1	RIKEN cDNA 2310057J18 gene
2310057M21Rik	7.04153	7.42322	2.81691	2.89302	0.0761036	68277	chr7	131342718	131362698	-	NM_026655	protein_coding	3110040E10Rik| AI429544	RIKEN cDNA 2310057M21 gene
2310057N15Rik	0	0	-7.64386	-7.64386	0	69696	chr16	88773181	88774206	-	NM_027170	protein_coding	Krtap13-1	RIKEN cDNA 2310057N15 gene
2310061I04Rik	25.6262	26.5705	4.67983	4.73202	0.0521958	69662	chr17	35892677	35897378	-	NM_001033630	protein_coding	.	RIKEN cDNA 2310061I04 gene
2310061N02Rik	0	0	-7.64386	-7.64386	0	69661	chr16	88707171	88707962	-	NM_027155	protein_coding	.	RIKEN cDNA 2310061N02 gene
2310065F04Rik	0	0	-7.64386	-7.64386	0	74184	chr11	67112461	67120080	-	NR_038055	lncRNA	linc-Myh	RIKEN cDNA 2310065F04 gene
2310067B10Rik	20.5086	19.0053	4.35851	4.24871	-0.109799	.	chr11	115765433	115799033	+	NM_028014	.	.	.
2310068J16Rik	0.600294	0.537784	-0.724292	-0.88155	-0.157258	70281	chr15	99972167	99973287	-	NR_028124	lncRNA	.	RIKEN cDNA 2310068J16 gene
2310069B03Rik	0.45056	0.520768	-1.13429	-0.927502	0.206785	69652	chr6	82877866	82881853	-	NR_040520	lncRNA	.	RIKEN cDNA 2310069B03 gene
2310069G16Rik	0	0	-7.64386	-7.64386	0	69659	chr15	44787763	44805829	+	NR_040309	lncRNA	.	RIKEN cDNA 2310069G16 gene
2310075C17Rik	0	0	-7.64386	-7.64386	0	70194	chr9	112227456	112228242	+	NR_131053	lncRNA	.	RIKEN cDNA 2310075C17 gene
2310079G19Rik	0	0	-7.64386	-7.64386	0	69699	chr16	88626788	88627666	-	NM_027173	protein_coding	.	RIKEN cDNA 2310079G19 gene
2310081J21Rik	0	0	-7.64386	-7.64386	0	69211	chr13	50261815	50680224	+	NR_045474	lncRNA	.	RIKEN cDNA 2310081J21 gene
2400006E01Rik	0.0535909	0	-4.09318	-7.64386	-3.55068	78648	chr3	41500931	41528474	-	NR_130791	lncRNA	lncRNA-JADE	RIKEN cDNA 2400006E01 gene
2410002F23Rik	38.8542	30.1811	5.28018	4.91581	-0.364372	668661	chr7	44246722	44252319	+	NM_025880	protein_coding	.	RIKEN cDNA 2410002F23 gene
2410003L11Rik	0	0	-7.64386	-7.64386	0	69729	chr11	97598511	97622893	+	NR_045496	lncRNA	.	RIKEN cDNA 2410003L11 gene
2410004B18Rik	14.9386	19.3999	3.90146	4.27835	0.376893	66421	chr3	145938032	145944275	+	NM_025555	protein_coding	4930572C24Rik	RIKEN cDNA 2410004B18 gene
2410004I01Rik	0	0	-7.64386	-7.64386	0	69739	chr11	102958300	102964154	-	NR_037963	lncRNA	.	RIKEN cDNA 2410004I01 gene
2410004P03Rik	0	0.0559601	-7.64386	-4.03599	3.60787	73667	chr12	17004958	17011727	-	NM_001201332	protein_coding	.	RIKEN cDNA 2410004P03 gene
2410006H16Rik	150.473	307.106	7.23341	8.26262	1.02921	69221	chr11	62602877	62604806	+	NR_030738	lncRNA	.	RIKEN cDNA 2410006H16 gene
2410012E07Rik	0	0.0775597	-7.64386	-3.59842	4.04544	73648	chr14	70852933	70873954	+	NR_045939	lncRNA	.	RIKEN cDNA 2410012E07 gene
2410015M20Rik	49.1095	59.3454	5.61808	5.89119	0.273109	224904	chr17	56607452	56609771	-	NM_153152	protein_coding	Mic13| QIL1| sr104	RIKEN cDNA 2410015M20 gene
2410016O06Rik	10.1994	12.4096	3.35112	3.63397	0.282846	71952	chr12	83950608	83952953	+	NM_023633	protein_coding	MAPJD| NO66	RIKEN cDNA 2410016O06 gene
2410017I17Rik	0	0	-7.64386	-7.64386	0	675325	chr17	36145018	36162374	+	NR_033517	lncRNA	.	RIKEN cDNA 2410017I17 gene
2410018L13Rik	0.800179	1.22608	-0.312619	0.299925	0.612543	69732	chr12	22953997	23010243	-	NR_015504	lncRNA	2810480C08Rik	RIKEN cDNA 2410018L13 gene
2410021H03Rik	0	0	-7.64386	-7.64386	0	69750	chr17	69275362	69277206	-	NR_045428	lncRNA	.	RIKEN cDNA 2410021H03 gene
2410089E03Rik	9.45569	7.12064	3.24195	2.83302	-0.408926	73692	chr15	8169106	8271158	+	NM_001162906	protein_coding	4732468D17Rik| b2b012Clo| Hug| Jbts17	RIKEN cDNA 2410089E03 gene
2410124H12Rik	0	0	-7.64386	-7.64386	0	76785	chr16	92478742	92497365	+	NM_029740	protein_coding	.	RIKEN cDNA 2410124H12 gene
2410127L17Rik	39.3605	33.8517	5.29886	5.08137	-0.21749	.	chr19	18670780	18704792	+	NM_026120	.	.	.
2410131K14Rik	7.24246	8.37237	2.85748	3.0665	0.209022	76792	chr5	118245227	118263114	+	NM_001081236	protein_coding	.	RIKEN cDNA 2410131K14 gene
2410137M14Rik	0	0	-7.64386	-7.64386	0	76797	chr17	36977701	36981237	-	NM_029747	protein_coding	RP23-98F21.3	RIKEN cDNA 2410137M14 gene
2410141K09Rik	0	0	-7.64386	-7.64386	0	76803	chr13	66418114	66441118	-	NM_183119	protein_coding	4930482J15Rik| Ayu21-35| Gt(pU21)35Imeg	RIKEN cDNA 2410141K09 gene
2500002B13Rik	4.56071	2.91197	2.19084	1.54447	-0.646369	78353	chr8	57487963	57510262	+	NR_126555	lncRNA	.	RIKEN cDNA 2500002B13 gene
2500004C02Rik	2.19062	1.47381	1.13463	0.564437	-0.570192	72326	chr2	153341157	153345810	-	NR_040318	lncRNA	RP23-192G18.7	RIKEN cDNA 2500004C02 gene
2510002D24Rik	8.29645	6.83637	3.05336	2.77429	-0.279078	72307	chr16	18836580	18840113	+	NM_001033164	protein_coding	2410043I01Rik| AA163535| AA409624| DXMgi27	RIKEN cDNA 2510002D24 gene
2510003B16Rik	0.534853	0.132635	-0.889361	-2.86108	-1.97172	76786	chr4	116123840	116138841	+	NR_131048	lncRNA	.	RIKEN cDNA 2510003B16 gene
2510009E07Rik	0.00922852	0.0447593	-6.13507	-4.32889	1.80618	72190	chr16	21649045	21694665	-	NM_001001881	protein_coding	AI194952	RIKEN cDNA 2510009E07 gene
2510039O18Rik	30.9519	30.8114	4.95219	4.94563	-0.00656267	77034	chr4	147940895	147947314	+	NM_029841	protein_coding	Kiaa2013	RIKEN cDNA 2510039O18 gene
2610001J05Rik	20.8027	18.9387	4.37905	4.24365	-0.135399	66520	chr6	13869074	13871483	-	NR_024619	lncRNA	C79299	RIKEN cDNA 2610001J05 gene
2610002M06Rik	4.02739	3.42551	2.01164	1.77842	-0.233212	67028	chrX	107782752	107816334	-	NM_025921	protein_coding	8430408J07Rik| AI876413| Chmp1b2	RIKEN cDNA 2610002M06 gene
2610005L07Rik	13.5114	11.3731	3.75664	3.50819	-0.248451	381598	chr8	20385782	20424814	-	NR_028428	misc_RNA	2810038F24Rik| 6720476A01Rik	RIKEN cDNA 2610005L07 gene
2610008E11Rik	2.58178	3.26688	1.37116	1.71012	0.338962	72128	chr10	79064374	79097600	-	NM_001004362	protein_coding	.	RIKEN cDNA 2610008E11 gene
2610015P09Rik	2.96875	2.94648	1.57228	1.56144	-0.0108448	.	chr16	43889902	43964314	+	NM_027801	.	.	.
2610016A17Rik	0	0	-7.64386	-7.64386	0	100503074	chr19	25671134	25672239	-	NR_045347	lncRNA	2610317C19Rik	RIKEN cDNA 2610016A17 gene
2610020C07Rik	0.844777	0.775908	-0.234844	-0.356776	-0.121932	69918	chr16	11203383	11225796	+	NR_038156	lncRNA	.	RIKEN cDNA 2610020C07 gene
2610020H08Rik	3.49839	2.50284	1.80875	1.32645	-0.482306	434234	chr7	119794130	119848938	+	NM_028129	protein_coding	.	RIKEN cDNA 2610020H08 gene
2610027K06Rik	0.237425	0.125913	-2.04439	-2.93332	-0.88893	69909	chr11	85791660	85832388	-	NR_077059	lncRNA	.	RIKEN cDNA 2610027K06 gene
2610028E06Rik	0	0	-7.64386	-7.64386	0	72395	chr4	125887851	125922310	-	NR_015560	lncRNA	BB043107	RIKEN cDNA 2610028E06 gene
2610028H24Rik	0	0	-7.64386	-7.64386	0	76964	chr10	76449081	76461218	+	NM_029816	protein_coding	ORF67	RIKEN cDNA 2610028H24 gene
2610035D17Rik	3.76223	3.52607	1.9135	1.82011	-0.0933987	72386	chr11	113043906	113201838	-	NR_015556	lncRNA	.	RIKEN cDNA 2610035D17 gene
2610035F20Rik	0	0	-7.64386	-7.64386	0	69248	chr14	122470377	122475199	-	NR_045046	lncRNA	.	RIKEN cDNA 2610035F20 gene
2610037D02Rik	0	0	-7.64386	-7.64386	0	70040	chr15	96190474	96197974	-	NR_040423	lncRNA	AU024679	RIKEN cDNA 2610037D02 gene
2610042L04Rik	0.0272542	0	-4.95437	-7.64386	-2.68949	554327	chr14	4334763	4354687	+	NM_001309398	protein_coding	takusan| Tksn	RIKEN cDNA 2610042L04 gene
2610044O15Rik8	3.4976	3.9724	1.80843	1.99183	0.183399	72139	chr8	129216354	129234046	-	NM_153780	protein_coding	2610044O15Rik	RIKEN cDNA 2610044O15 gene
2610100L16Rik	0	0	-7.64386	-7.64386	0	.	chr3	17789921	17800071	+	NR_033490	.	.	.
2610203C22Rik	0	0	-7.64386	-7.64386	0	72481	chr1	9560833	9631092	-	NR_015470	lncRNA	2310007M24Rik	RIKEN cDNA 2610203C22 gene
2610206C17Rik	0.18171	0.206419	-2.42113	-2.24182	0.179306	72495	chr7	84689640	84776549	+	NR_038175	lncRNA	.	RIKEN cDNA 2610206C17 gene
2610301B20Rik	4.42751	5.86565	2.14812	2.55352	0.405396	67157	chr4	10874498	10899423	+	NM_026005	protein_coding	AI428449	RIKEN cDNA 2610301B20 gene
2610305D13Rik	0.25259	0.415406	-1.95685	-1.25014	0.706707	112422	chr4	147611936	147642508	-	NM_145078	protein_coding	Ssm1b	RIKEN cDNA 2610305D13 gene
2610306M01Rik	2.10042	3.1357	1.07411	1.65109	0.576978	67170	chr6	86848407	86849440	-	NR_028298	lncRNA	.	RIKEN cDNA 2610306M01 gene
2610307P16Rik	0.624157	0.666622	-0.668508	-0.574279	0.0942294	72518	chr13	28460034	28885422	-	NR_045053	lncRNA	AI666457	RIKEN cDNA 2610307P16 gene
2610316D01Rik	0.0639237	0	-3.85886	-7.64386	-3.785	72511	chr3	45280439	45378260	-	NR_045172	lncRNA	.	RIKEN cDNA 2610316D01 gene
2610318N02Rik	3.62657	2.86524	1.86059	1.52117	-0.339422	70458	chr16	17113398	17125106	-	NM_183287	protein_coding	AL033325	RIKEN cDNA 2610318N02 gene
2610507B11Rik	73.9389	47.2158	6.20836	5.56135	-0.647009	72503	chr11	78261754	78290625	+	NM_001002004	protein_coding	AU022687| D11Bhm178e| D11Bhm179e| E1| Kiaa0100| mKIAA0100	RIKEN cDNA 2610507B11 gene
2610507I01Rik	0.40688	0.345826	-1.2797	-1.51117	-0.231468	72203	chr11	59197793	59202431	-	NR_037964	lncRNA	5033414D05Rik	RIKEN cDNA 2610507I01 gene
2610524H06Rik	17.8368	13.707	4.15719	3.77737	-0.379822	330173	chr5	114821937	114823468	-	NM_181075	protein_coding	.	RIKEN cDNA 2610524H06 gene
2610528A11Rik	0.582583	0.981809	-0.767135	-0.0191572	0.747978	70045	chr14	37102140	37110101	-	NM_001206684	protein_coding	AW494830	RIKEN cDNA 2610528A11 gene
2610528J11Rik	1.16199	1.26495	0.222792	0.344772	0.121979	66451	chr4	118527275	118530217	+	NM_025572	protein_coding	TEMP	RIKEN cDNA 2610528J11 gene
2700029M09Rik	32.368	29.1864	5.01672	4.86747	-0.149248	.	chr8	60890451	60907572	+	NM_028299	.	.	.
2700038G22Rik	10.4188	6.74346	3.38181	2.75456	-0.627251	67194	chr5	23850597	23855033	+	NR_045040	lncRNA	.	RIKEN cDNA 2700038G22 gene
2700046A07Rik	0	0	-7.64386	-7.64386	0	78449	chr18	62751674	62756347	-	NR_037693	lncRNA	A330042I05Rik	RIKEN cDNA 2700046A07 gene
2700046G09Rik	0.797229	0.621189	-0.317914	-0.67533	-0.357416	67188	chr19	32389216	32391184	+	NR_033198	lncRNA	.	RIKEN cDNA 2700046G09 gene
2700049A03Rik	4.73445	2.93881	2.24472	1.55768	-0.687035	76967	chr12	71136848	71243303	+	NM_029818	protein_coding	mKIAA0586| Ta3| Talpid3	RIKEN cDNA 2700049A03 gene
2700054A10Rik	0.914651	0.726901	-0.120842	-0.45028	-0.329438	72578	chr17	13487021	13554094	-	NR_045436	lncRNA	.	RIKEN cDNA 2700054A10 gene
2700060E02Rik	48.85	49.7953	5.61043	5.63808	0.0276482	68045	chr14	19811402	19823823	-	NM_026528	protein_coding	.	RIKEN cDNA 2700060E02 gene
2700062C07Rik	6.42735	8.61718	2.68535	3.10805	0.422707	68046	chr18	24470871	24477767	+	NM_026529	protein_coding	AI195775| C87515	RIKEN cDNA 2700062C07 gene
2700069I18Rik	0	0	-7.64386	-7.64386	0	72608	chr3	5177824	5220823	-	NR_045905	lncRNA	.	RIKEN cDNA 2700069I18 gene
2700070H01Rik	0.0297145	0	-4.84832	-7.64386	-2.79554	72609	chr14	63055073	63058149	+	NR_046019	lncRNA	.	RIKEN cDNA 2700070H01 gene
2700081O15Rik	14.4738	12.0177	3.85587	3.58769	-0.268181	108899	chr19	7417625	7425904	+	NM_175381	protein_coding	AI255177| AI848741| AW742297	RIKEN cDNA 2700081O15 gene
2700089I24Rik	0	0	-7.64386	-7.64386	0	72647	chr19	59493136	59559391	+	NR_045308	lncRNA	.	RIKEN cDNA 2700089I24 gene
2700094K13Rik	118.429	86.9621	6.88794	6.4424	-0.445542	72657	chr2	84669221	84670708	-	NM_001037279	protein_coding	Selh	RIKEN cDNA 2700094K13 gene
2700097O09Rik	9.81898	8.91535	3.29631	3.1571	-0.139207	72658	chr12	55045661	55080110	-	NR_030764	protein_coding	AW552125	RIKEN cDNA 2700097O09 gene
2700099C18Rik	9.07571	10.1939	3.18281	3.35034	0.167537	77022	chr17	94750100	94775129	+	NR_024720	misc_RNA	9430041D22Rik	RIKEN cDNA 2700099C18 gene
2810001G20Rik	2.70009	1.48436	1.43568	0.574693	-0.860984	66456	chr11	64079484	64083259	+	NR_033780	lncRNA	AW045514	RIKEN cDNA 2810001G20 gene
2810002D19Rik	3.04841	3.74024	1.61042	1.90506	0.294637	66457	chr2	94406707	94411680	+	NR_027831	lncRNA	.	RIKEN cDNA 2810002D19 gene
2810004N23Rik	32.999	31.6499	5.04457	4.98436	-0.060212	66523	chr8	124839355	124863029	-	NM_025615	protein_coding	3110004G14Rik| Ayu21-55| Gt(pU21)55Imeg| GtAyu21-55	RIKEN cDNA 2810004N23 gene
2810006K23Rik	7.32994	5.78408	2.87479	2.53333	-0.341451	72650	chr5	124328089	124341852	+	NM_028310	protein_coding	.	RIKEN cDNA 2810006K23 gene
2810013P06Rik	3.64165	3.66473	1.86657	1.87567	0.00910218	100503178	chr8	123042575	123044602	+	NR_045268	lncRNA	.	RIKEN cDNA 2810013P06 gene
2810021J22Rik	1.04477	1.23141	0.0700733	0.306157	0.236084	69944	chr11	58867240	58884338	+	NM_172403	protein_coding	AI449137| RP23-419P16.9	RIKEN cDNA 2810021J22 gene
2810025M15Rik	20.7053	21.0333	4.37228	4.39495	0.0226697	69953	chr1	157412352	157420236	+	NR_027984	lncRNA	AI429618	RIKEN cDNA 2810025M15 gene
2810029C07Rik	0.680633	0.687712	-0.544492	-0.529672	0.0148191	100504687	chr12	111572317	111574402	-	NR_045295	lncRNA	AU017849	RIKEN cDNA 2810029C07 gene
2810032G03Rik	0	0	-7.64386	-7.64386	0	72669	chr12	5376502	5416132	+	NR_015579	lncRNA	AI461720	RIKEN cDNA 2810032G03 gene
2810047C21Rik1	2.41852	2.29357	1.2771	1.20074	-0.0763674	72716	chr7	8086047	8093037	-	NR_015598	lncRNA	100042870| 2810047C21Rik| AA683836| Gm4082	RIKEN cDNA 2810047C21 gene 1
2810049E08Rik	0	0	-7.64386	-7.64386	0	72677	chr13	83891208	83928710	+	NR_036594	lncRNA	.	RIKEN cDNA 2810049E08 gene
2810403A07Rik	34.3545	31.7921	5.10264	4.99082	-0.111814	74200	chr3	88685794	88712933	+	NM_028814	protein_coding	A430106P18Rik| AI256352| AI451678| Blom7| Kiaa0907	RIKEN cDNA 2810403A07 gene
2810403D21Rik	0.229125	0.224189	-2.09465	-2.12539	-0.0307412	69964	chrX	108834478	108886896	+	NR_015493	lncRNA	1810022M18Rik| 4632410B05Rik| AU017716	RIKEN cDNA 2810403D21 gene
2810404M03Rik	0	0	-7.64386	-7.64386	0	69966	chr8	41827267	42046202	+	NR_045497	lncRNA	.	RIKEN cDNA 2810404M03 gene
2810405F15Rik	0	0.132802	-7.64386	-2.85933	4.78452	69974	chr2	116074548	116076096	-	NR_033447	lncRNA	.	RIKEN cDNA 2810405F15 gene
2810408A11Rik	2.99253	3.94643	1.58377	1.98237	0.398601	70419	chr11	69897358	69900986	-	NM_027419	protein_coding	1700019L01Rik| 4930470J18Rik	RIKEN cDNA 2810408A11 gene
2810408I11Rik	8.57722	5.95443	3.10135	2.57517	-0.526177	69941	chr1	64679869	64690659	-	NR_038009	lncRNA	.	RIKEN cDNA 2810408I11 gene
2810410L24Rik	0.762168	0.831208	-0.382386	-0.258066	0.124319	100042332	chr11	120186650	120189856	-	NR_030682	lncRNA	.	RIKEN cDNA 2810410L24 gene
2810417H13Rik	49.8493	27.0021	5.63965	4.75527	-0.884379	68026	chr9	65890323	65903551	+	NM_026515	protein_coding	AA409629| mKIAA0101| Ns5apt9| Ns5atp9| p15(PAF)| Paf| PAF15	RIKEN cDNA 2810417H13 gene
2810428I15Rik	55.0095	61.9656	5.78174	5.95351	0.171772	66462	chr8	70504296	70506739	-	NM_025577	protein_coding	.	RIKEN cDNA 2810428I15 gene
2810429I04Rik	0.724374	0.238973	-0.455269	-2.03521	-1.57994	76937	chr13	3478303	3492398	+	NR_015522	lncRNA	AI256682	RIKEN cDNA 2810429I04 gene
2810433D01Rik	0	0	-7.64386	-7.64386	0	77132	chr11	102619507	102624416	-	NR_033474	lncRNA	.	RIKEN cDNA 2810433D01 gene
2810442N19Rik	0	0	-7.64386	-7.64386	0	72753	chr1	162004969	162016485	+	NR_040562	lncRNA	.	RIKEN cDNA 2810442N19 gene
2810454H06Rik	0.331954	0.237616	-1.56938	-2.04325	-0.473877	72813	chr6	134897961	134900785	+	NR_029441	lncRNA	.	RIKEN cDNA 2810454H06 gene
2810459M11Rik	0.0292982	0.0284475	-4.86572	-4.90196	-0.0362345	72792	chr1	86045863	86055456	+	NM_001144992	protein_coding	.	RIKEN cDNA 2810459M11 gene
2810468N07Rik	0	0.0781066	-7.64386	-3.58889	4.05496	72834	chr17	25570811	25575043	+	NR_045176	lncRNA	.	RIKEN cDNA 2810468N07 gene
2810471M01Rik	0.0328981	0.0320479	-4.72173	-4.75446	-0.0327338	72818	chr11	28681564	28693276	+	NR_045906	lncRNA	.	RIKEN cDNA 2810471M01 gene
2810474O19Rik	20.6491	24.1271	4.36836	4.59288	0.224525	67246	chr6	149309414	149335663	+	NM_001289661	protein_coding	6720435I21Rik| AA536804| AU020969| GET| Kiaa1551	RIKEN cDNA 2810474O19 gene
2900005J15Rik	0	0	-7.64386	-7.64386	0	67261	chr5	25100975	25103007	+	NR_027851	lncRNA	.	RIKEN cDNA 2900005J15 gene
2900008C10Rik	0.317249	0.23207	-1.63375	-2.07661	-0.442863	.	chrX	12134454	12160346	-	NR_045434	.	.	.
2900009J06Rik	0.352952	0.528809	-1.48216	-0.905604	0.576557	100502745	chr1	127753617	127774054	-	NR_045298	lncRNA	.	RIKEN cDNA 2900009J06 gene
2900011O08Rik	0	0.0206992	-7.64386	-5.28213	2.36172	67254	chr16	13986637	14101494	+	NM_144518	protein_coding	MINP	RIKEN cDNA 2900011O08 gene
2900026A02Rik	20.2289	14.6391	4.3387	3.87225	-0.466455	243219	chr5	113086323	113163313	-	NM_172884	protein_coding	8430408O14Rik| A530094D01| AW539426| Gm449| Kiaa1671| mKIAA1671	RIKEN cDNA 2900026A02 gene
2900041M22Rik	0.0804273	0.0784523	-3.54916	-3.5829	-0.0337454	78403	chr11	117611247	117613417	+	NR_015489	lncRNA	.	RIKEN cDNA 2900041M22 gene
2900052N01Rik	0	0	-7.64386	-7.64386	0	73040	chr9	46913603	46927366	+	NR_015605	lncRNA	AU067665	RIKEN cDNA 2900052N01 gene
2900055J20Rik	0	0	-7.64386	-7.64386	0	73001	chr18	40256962	40257687	+	NR_045177	lncRNA	.	RIKEN cDNA 2900055J20 gene
2900057B20Rik	0	0	-7.64386	-7.64386	0	73009	chr18	76091557	76098471	-	NR_045365	lncRNA	.	RIKEN cDNA 2900057B20 gene
2900060B14Rik	1.05333	0.231514	0.0817895	-2.08	-2.16179	68204	chr1	118458669	118459265	-	NR_027901	lncRNA	.	RIKEN cDNA 2900060B14 gene
2900076A07Rik	0.847613	1.66273	-0.230037	0.737886	0.967923	100504421	chr7	81523550	81531498	+	NR_045299	lncRNA	WI1-1616M8.2	RIKEN cDNA 2900076A07 gene
2900079G21Rik	0	0	-7.64386	-7.64386	0	620760	chr9	112234277	112348925	+	NR_033431	lncRNA	620760| C130083B14| Gm6179	RIKEN cDNA 2900079G21 gene
2900092C05Rik	0	0	-7.64386	-7.64386	0	73090	chr7	12512551	12556321	+	NM_028434	protein_coding	.	RIKEN cDNA 2900092C05 gene
2900092D14Rik	0.0347303	0.0506075	-4.65362	-4.16858	0.48504	73100	chr1	42700336	42703176	+	NR_027891	lncRNA	.	RIKEN cDNA 2900092D14 gene
2900097C17Rik	55.8658	52.7729	5.80402	5.72186	-0.0821605	347740	chr2	156388063	156392979	-	NR_024329	lncRNA	1810005K14Rik| 4930563C06Rik	RIKEN cDNA 2900097C17 gene
3000002C10Rik	1.10994	0.95819	0.156966	-0.0541077	-0.211074	378954	chr9	109830154	109831431	-	NR_033215	misc_RNA	.	RIKEN cDNA 3000002C10 gene
3010001F23Rik	0	0	-7.64386	-7.64386	0	75693	chrX	152368572	152416702	+	NR_045451	lncRNA	.	RIKEN cDNA 3010001F23 gene
3010026O09Rik	3.28296	4.4521	1.71719	2.15611	0.438913	68067	chr11	50174851	50200115	+	NM_026543	protein_coding	2900016G09Rik| AI851514| AW475975	RIKEN cDNA 3010026O09 gene
3100003L05Rik	0	0	-7.64386	-7.64386	0	73076	chr7	124625670	124708935	-	NR_045907	lncRNA	.	RIKEN cDNA 3100003L05 gene
3110001I22Rik	2.76849	2.60158	1.4717	1.38216	-0.0895444	66598	chr16	13672020	13678385	+	NM_025653	protein_coding	.	RIKEN cDNA 3110001I22 gene
3110002H16Rik	11.8978	14.9733	3.57323	3.9048	0.331573	76482	chr18	12168730	12189969	+	NM_029623	protein_coding	2400010D15Rik| Mic-1| Mic1	RIKEN cDNA 3110002H16 gene
3110009E18Rik	1.73062	1.83112	0.795451	0.87666	0.0812092	73103	chr1	120121187	120188189	+	NM_028439	protein_coding	.	RIKEN cDNA 3110009E18 gene
3110009F21Rik	0.6468	1.00803	-0.617499	0.0186769	0.636176	67280	chr12	110151654	110158073	-	NR_045466	lncRNA	.	RIKEN cDNA 3110009F21 gene
3110015C05Rik	0	0	-7.64386	-7.64386	0	73129	chr13	111211469	111229431	-	NR_045908	lncRNA	.	RIKEN cDNA 3110015C05 gene
3110021A11Rik	0.666583	0.43614	-0.574362	-1.18069	-0.606329	67289	chr6	119848193	119849016	+	NR_030776	lncRNA	.	RIKEN cDNA 3110021A11 gene
3110021N24Rik	1.36767	1.33127	0.456985	0.418212	-0.0387733	.	chr4	108719649	108781904	+	NM_001254730	.	.	.
3110035E14Rik	0	0	-7.64386	-7.64386	0	76982	chr1	9601267	9627142	+	NM_178399	protein_coding	AI415019| AV164974| R75066	RIKEN cDNA 3110035E14 gene
3110039I08Rik	27.0959	23.1954	4.76027	4.53608	-0.224191	73144	chr9	41376526	41615183	+	NR_040725	lncRNA	2610203C20Rik| AI848448| D230004N17Rik| D3Mgi9| Mir100hg	RIKEN cDNA 3110039I08 gene
3110039M20Rik	8.12296	13.0247	3.02289	3.70373	0.680839	67293	chr12	49389652	49407346	+	NR_026733	lncRNA	.	RIKEN cDNA 3110039M20 gene
3110040N11Rik	10.2651	8.55064	3.36038	3.09688	-0.263503	67290	chr7	81782187	81789453	-	NM_026077	protein_coding	AI851475	RIKEN cDNA 3110040N11 gene
3110043O21Rik	5.52077	13.2616	2.46618	3.72973	1.26355	73205	chr4	35191282	35225880	-	NM_001081343	protein_coding	AI840585	RIKEN cDNA 3110043O21 gene
3110045C21Rik	1.37937	1.63649	0.46923	0.715006	0.245776	67303	chr1	169969409	169972396	+	NR_040438	lncRNA	AI838577	RIKEN cDNA 3110045C21 gene
3110052M02Rik	0.516825	0.885609	-0.938362	-0.167136	0.771226	73229	chr17	21650611	21664966	+	NM_001166497	protein_coding	mszf57| mszf71	RIKEN cDNA 3110052M02 gene
3110056K07Rik	3.07695	2.65671	1.62384	1.41235	-0.21149	73204	chr12	70991615	71015823	-	NR_045055	lncRNA	4921536K06Rik	RIKEN cDNA 3110056K07 gene
3110057O12Rik	1.70141	1.20616	0.770964	0.276389	-0.494575	.	chr3	40894277	40936307	+	NM_026622	.	.	.
3110062M04Rik	4.46485	5.87958	2.16023	2.55694	0.396713	78412	chr6	34871771	34878065	-	NM_199145	protein_coding	AL023049| Mri	RIKEN cDNA 3110062M04 gene
3110070M22Rik	0.794197	0.436508	-0.323377	-1.17949	-0.856112	67304	chr13	119487257	119488384	-	NR_027974	lncRNA	.	RIKEN cDNA 3110070M22 gene
3110079O15Rik	0	0	-7.64386	-7.64386	0	73234	chr1	87470264	87475459	+	NM_028473	protein_coding	Snorc	RIKEN cDNA 3110079O15 gene
3110082I17Rik	27.2385	26.1963	4.76784	4.71157	-0.0562737	73212	chr5	139359739	139460534	-	NM_028469	protein_coding	AW411904	RIKEN cDNA 3110082I17 gene
3110082J24Rik	0	0	-7.64386	-7.64386	0	433868	chr5	30103584	30106086	-	NM_001256263	protein_coding	ENSMUSG00000073106	RIKEN cDNA 3110082J24 gene
3110099E03Rik	0	0	-7.64386	-7.64386	0	100043232	chr2	115493513	115512201	-	NR_030712	lncRNA	.	RIKEN cDNA 3110099E03 gene
3200001D21Rik	0.066093	0.0642591	-3.81415	-3.85185	-0.0377039	71818	chr12	88365314	88377323	-	NR_045888	lncRNA	.	RIKEN cDNA 3200001D21 gene
3300002I08Rik	0.517791	0.10218	-0.935694	-3.22189	-2.2862	69277	chr2	150310937	150362765	-	NM_027017	protein_coding	2900016H11Rik| RP23-91K11.3	RIKEN cDNA 3300002I08 gene
3300002P13Rik	0.0516548	0	-4.14166	-7.64386	-3.5022	70230	chr7	3421665	3423445	-	NR_126426	lncRNA	.	RIKEN cDNA 3300002P13 gene
3300005D01Rik	4.93166	3.60157	2.30354	1.85063	-0.452908	78512	chr17	5798657	5803240	+	NR_045081	lncRNA	.	RIKEN cDNA 3300005D01 gene
3425401B19Rik	0	0	-7.64386	-7.64386	0	100504518	chr14	32659119	32685272	-	NM_001195097	protein_coding	.	RIKEN cDNA 3425401B19 gene
3632451O06Rik	0	0	-7.64386	-7.64386	0	67419	chr14	49682019	49783367	-	NM_026142	protein_coding	AU067705	RIKEN cDNA 3632451O06 gene
3632454L22Rik	0.0409445	0.0264122	-4.44396	-4.99253	-0.548567	320606	chrX	135022422	135060336	-	NR_040281	lncRNA	.	RIKEN cDNA 3632454L22 gene
3830403N18Rik	30.5303	37.9524	4.93241	5.24631	0.313903	70691	chrX	56136572	56153496	+	NM_027510	protein_coding	Xlrl	RIKEN cDNA 3830403N18 gene
3830406C13Rik	3.06239	2.75092	1.61701	1.46253	-0.154478	218734	chr14	12284203	12303231	+	NM_146051	protein_coding	.	RIKEN cDNA 3830406C13 gene
3830408C21Rik	0.162268	0.236863	-2.57977	-2.04774	0.532029	100040322	chr13	107022570	107033518	+	NR_015471	lncRNA	.	RIKEN cDNA 3830408C21 gene
3830417A13Rik	0.0317123	0	-4.76759	-7.64386	-2.87626	70696	chrX	64173548	64178778	+	NM_027512	protein_coding	.	RIKEN cDNA 3830417A13 gene
3830432H09Rik	0.0207237	0.020144	-5.28076	-5.31364	-0.032884	320069	chr1	119529480	119536165	-	NR_126486	lncRNA	.	RIKEN cDNA 3830432H09 gene
3930402G23Rik	0.0693027	0.0504922	-3.75044	-4.17157	-0.42113	665306	chr8	10924427	10928457	-	NR_030715	lncRNA	.	RIKEN cDNA 3930402G23 gene
4430402I18Rik	0	0	-7.64386	-7.64386	0	381218	chr19	28923064	28964154	-	NM_198651	protein_coding	AW122618| Spata6l	RIKEN cDNA 4430402I18 gene
4631405J19Rik	0	0	-7.64386	-7.64386	0	433456	chr2	93029348	93033445	+	NR_110333	lncRNA	.	RIKEN cDNA 4631405J19 gene
4632404H12Rik	0.716776	0.696216	-0.470377	-0.512069	-0.0416923	74034	chr3	89767511	89773400	-	NR_130957	lncRNA	.	RIKEN cDNA 4632404H12 gene
4632415L05Rik	3.74663	3.68137	1.90752	1.8822	-0.0253167	70808	chr3	19894871	19898984	+	NR_027985	misc_RNA	AI662792	RIKEN cDNA 4632415L05 gene
4632427E13Rik	0.692054	1.1696	-0.520658	0.23217	0.752827	666737	chr7	92740706	92741459	-	NR_015510	lncRNA	AU015482	RIKEN cDNA 4632427E13 gene
4632428C04Rik	0.102966	0.200166	-3.21135	-2.28514	0.926215	100043102	chr16	30008667	30021430	+	NR_033631	lncRNA	100043102| Gm4231	RIKEN cDNA 4632428C04 gene
4632428N05Rik	0.0887493	0.0574194	-3.41505	-4.00186	-0.586813	.	chr10	60346851	60372684	+	NM_001159572	.	.	.
4732416N19Rik	0	0	-7.64386	-7.64386	0	320737	chr6	148212288	148235663	+	NR_015615	lncRNA	.	RIKEN cDNA 4732416N19 gene
4732456N10Rik	0	0	-7.64386	-7.64386	0	.	chr15	101552356	101562950	-	NM_177717	.	.	.
4732471J01Rik	1.3569	0.943286	0.445621	-0.0766059	-0.522227	654804	chr7	25376819	25566417	+	NR_073028	lncRNA	.	RIKEN cDNA 4732471J01 gene
4732490B19Rik	0	0.0198551	-7.64386	-5.33031	2.31354	319871	chr11	113203315	113209669	-	NR_040276	lncRNA	.	RIKEN cDNA 4732490B19 gene
4732491K20Rik	0.123333	0.13474	-2.96204	-2.83918	0.122853	224523	chr17	12318853	12327250	+	NR_045290	lncRNA	.	RIKEN cDNA 4732491K20 gene
4831407H17Rik	0	0	-7.64386	-7.64386	0	77710	chr14	30458036	30463282	+	NR_131095	lncRNA	.	RIKEN cDNA 4831407H17 gene
4831440E17Rik	0.204676	0.178718	-2.25377	-2.44444	-0.190669	320965	chr5	25499797	25504473	+	NR_030700	lncRNA	.	RIKEN cDNA 4831440E17 gene
4833411C07Rik	0	0	-7.64386	-7.64386	0	71624	chr8	10899922	10902334	+	NR_102285	lncRNA	.	RIKEN cDNA 4833411C07 gene
4833412C05Rik	0	0	-7.64386	-7.64386	0	73904	chr7	67784538	67803496	-	NR_045954	lncRNA	Bigheart	RIKEN cDNA 4833412C05 gene
4833415N18Rik	0.057642	0	-3.99673	-7.64386	-3.64713	73761	chr16	11779702	11781501	+	NR_126430	lncRNA	.	RIKEN cDNA 4833415N18 gene
4833417C18Rik	0.411171	0.240684	-1.26475	-2.02512	-0.760373	73906	chr11	95858817	95861046	+	NR_045187	lncRNA	.	RIKEN cDNA 4833417C18 gene
4833418N02Rik	0.138253	0.10104	-2.80336	-3.23732	-0.433957	74597	chr17	87274886	87282814	-	NR_015506	lncRNA	.	RIKEN cDNA 4833418N02 gene
4833419F23Rik	0	0.0664739	-7.64386	-3.80644	3.83742	73915	chr18	4353547	4368945	+	NR_040328	lncRNA	.	RIKEN cDNA 4833419F23 gene
4833420G17Rik	13.9264	18.6829	3.80027	4.22403	0.423764	67392	chr13	119462759	119486117	+	NM_001113550	protein_coding	2210017J06Rik| 5730533D17Rik| AW107518| C85193	RIKEN cDNA 4833420G17 gene
4833422C13Rik	0.378111	0.156672	-1.38417	-2.62886	-1.24469	373852	chr13	91701665	91741872	-	NR_015501	lncRNA	.	RIKEN cDNA 4833422C13 gene
4833422M21Rik	0	0	-7.64386	-7.64386	0	75768	chr15	96231870	96254684	-	NR_130160	lncRNA	4933406G12Rik	RIKEN cDNA 4833422M21 gene
4833423E24Rik	0	0	-7.64386	-7.64386	0	228151	chr2	85484092	85518935	-	NM_001081664	protein_coding	Fads2p1| Gm113	RIKEN cDNA 4833423E24 gene
4833427F10Rik	0.324554	0.351496	-1.60141	-1.48804	0.113371	74601	chr17	35772450	35780687	+	NR_045459	lncRNA	.	RIKEN cDNA 4833427F10 gene
4833427G06Rik	0.0804459	0	-3.54884	-7.64386	-4.09501	235345	chr9	51081313	51102078	-	NM_177702	protein_coding	.	RIKEN cDNA 4833427G06 gene
4833428L15Rik	0	0	-7.64386	-7.64386	0	74602	chr9	45416626	45431232	-	NR_040732	lncRNA	.	RIKEN cDNA 4833428L15 gene
4833439L19Rik	20.613	25.591	4.36583	4.67785	0.312014	97820	chr13	54551218	54565382	-	NM_001252645	protein_coding	4930558H15Rik| C81457| Kiaa1191| P33monox	RIKEN cDNA 4833439L19 gene
4921501E09Rik	0	0	-7.64386	-7.64386	0	74042	chr17	33064143	33068058	-	NM_001009544	protein_coding	PHF8	RIKEN cDNA 4921501E09 gene
4921504A21Rik	0.0491458	0.0478043	-4.20701	-4.2432	-0.036194	70832	chr5	19202368	19226555	-	NR_102341	lncRNA	.	RIKEN cDNA 4921504A21 gene
4921504E06Rik	0	0	-7.64386	-7.64386	0	70909	chr2	19462837	19553910	-	NM_027600	protein_coding	4921522E24Rik	RIKEN cDNA 4921504E06 gene
4921506M07Rik	0.611119	0.875961	-0.698719	-0.18285	0.515869	.	chr12	57564115	57622109	+	NM_001037743	.	.	.
4921507L20Rik	0.170244	0.0663515	-2.51256	-3.80891	-1.29635	.	chr2	93980034	93983575	+	NR_045827	.	.	.
4921507P07Rik	0.408556	0.77346	-1.27385	-0.361305	0.91254	70821	chr6	50573304	50596590	-	NM_027564	protein_coding	TISP74	RIKEN cDNA 4921507P07 gene
4921508D12Rik	0	0	-7.64386	-7.64386	0	70845	chr2	132424741	132452499	+	NR_045802	lncRNA	.	RIKEN cDNA 4921508D12 gene
4921509C19Rik	0	0	-7.64386	-7.64386	0	381393	chr2	151470542	151476151	-	NM_198655	protein_coding	Gm1005	RIKEN cDNA 4921509C19 gene
4921509O07Rik	0	0	-7.64386	-7.64386	0	70917	chr13	113446288	113502844	-	NR_045501	lncRNA	.	RIKEN cDNA 4921509O07 gene
4921511C10Rik	0.0364058	0.0354875	-4.59402	-4.62638	-0.0323563	70924	chr3	79212919	79253913	+	NR_045502	lncRNA	.	RIKEN cDNA 4921511C10 gene
4921511C20Rik	0	0	-7.64386	-7.64386	0	245598	chrX	127394293	127395898	+	NR_003646	misc_RNA	Gm383	RIKEN cDNA 4921511C20 gene
4921511H03Rik	0	0	-7.64386	-7.64386	0	70920	chr5	7304164	7311491	+	NM_027603	protein_coding	.	RIKEN cDNA 4921511H03 gene
4921511I17Rik	0	0	-7.64386	-7.64386	0	70858	chr12	12351522	12392475	-	NR_045829	lncRNA	.	RIKEN cDNA 4921511I17 gene
4921511M17Rik	0	0	-7.64386	-7.64386	0	667256	chrX	154001590	154120685	-	NM_001201358	protein_coding	.	RIKEN cDNA 4921511M17 gene
4921513I03Rik	0.13361	0.195253	-2.8509	-2.3201	0.530793	70874	chr10	120765732	120778886	+	NR_038003	lncRNA	.	RIKEN cDNA 4921513I03 gene
4921515E04Rik	0	0	-7.64386	-7.64386	0	70886	chr15	18078137	18369627	-	NR_045711	lncRNA	.	RIKEN cDNA 4921515E04 gene
4921517D22Rik	0	0	-7.64386	-7.64386	0	70900	chr13	59687402	59694101	-	NM_183290	protein_coding	.	RIKEN cDNA 4921517D22 gene
4921518K17Rik	0.0143707	0	-5.68998	-7.64386	-1.95388	78758	chr12	57585975	57618602	-	NR_131110	lncRNA	.	RIKEN cDNA 4921518K17 gene
4921524J17Rik	4.97476	9.5136	2.31608	3.25075	0.934673	66714	chr8	85408759	85432841	-	NR_033144	protein_coding	.	RIKEN cDNA 4921524J17 gene
4921524L21Rik	0	0	-7.64386	-7.64386	0	70901	chr18	6603633	6638966	+	NM_027598	protein_coding	.	RIKEN cDNA 4921524L21 gene
4921525O09Rik	0	0	-7.64386	-7.64386	0	74050	chr13	52096741	52124160	+	NR_045061	lncRNA	.	RIKEN cDNA 4921525O09 gene
4921529L05Rik	0	0	-7.64386	-7.64386	0	320178	chr6	53978691	54017383	+	NR_110484	lncRNA	.	RIKEN cDNA 4921529L05 gene
4921530L21Rik	0	0	-7.64386	-7.64386	0	66732	chr14	95881266	95882775	+	NM_025733	protein_coding	.	RIKEN cDNA 4921530L21 gene
4921531C22Rik	1.34666	1.12699	0.434732	0.178861	-0.255871	66730	chr2	179976853	179979013	+	NR_033782	lncRNA	.	RIKEN cDNA 4921531C22 gene
4921531P14Rik	0	0	-7.64386	-7.64386	0	70960	chr18	83292792	83325884	-	NR_045361	lncRNA	1700108N05Rik	RIKEN cDNA 4921531P14 gene
4921533I20Rik	0	0	-7.64386	-7.64386	0	664619	chr18	17234483	17235482	-	NR_033607	misc_RNA	.	Riken cDNA 4921533I20 gene
4921534H16Rik	0	0	-7.64386	-7.64386	0	66737	chr9	98003420	98012175	+	NR_110443	lncRNA	.	RIKEN cDNA 4921534H16 gene
4921536K21Rik	1.10031	1.54848	0.144451	0.635504	0.491053	67430	chr11	3886088	3895126	-	NM_026150	protein_coding	AV043724	RIKEN cDNA 4921536K21 gene
4921539E11Rik	0	0	-7.64386	-7.64386	0	70941	chr4	103230445	103290863	-	NM_001163494	protein_coding	.	RIKEN cDNA 4921539E11 gene
4922502D21Rik	0	0	-7.64386	-7.64386	0	381816	chr6	129322165	129331781	-	NM_199034	protein_coding	Clec2m| Gm1074| SPATA78	RIKEN cDNA 4922502D21 gene
4922502H24Rik	0	0	-7.64386	-7.64386	0	78136	chr13	101391871	101397580	-	NR_046187	lncRNA	.	RIKEN cDNA 4922502H24 gene
4922502N22Rik	0	0	-7.64386	-7.64386	0	70962	chr6	139315597	139322576	-	NR_045149	lncRNA	.	RIKEN cDNA 4922502N22 gene
4930401C15Rik	0	0	-7.64386	-7.64386	0	73803	chr10	25779314	25837437	-	NR_045349	lncRNA	.	RIKEN cDNA 4930401C15 gene
4930401O10Rik	0	0	-7.64386	-7.64386	0	73816	chr11	71928471	71940122	-	NR_045942	lncRNA	.	RIKEN cDNA 4930401O10 gene
4930401O12Rik	0	0	-7.64386	-7.64386	0	73924	chr13	31213410	31241086	-	NR_045957	lncRNA	.	RIKEN cDNA 4930401O12 gene
4930402F06Rik	0	0	-7.64386	-7.64386	0	74854	chr2	35375562	35397174	-	NM_001272040	protein_coding	RP23-458A10.2	RIKEN cDNA 4930402F06 gene
4930402F11Rik	0	0	-7.64386	-7.64386	0	73796	chr7	69496094	69499689	+	NR_045940	lncRNA	.	RIKEN cDNA 4930402F11 gene
4930402H24Rik	8.06139	8.21317	3.01192	3.03882	0.026894	228602	chr2	130707853	130840110	-	NM_029432	protein_coding	2810487F15Rik| AI413763| C78926	RIKEN cDNA 4930402H24 gene
4930402K13Rik	0	0	-7.64386	-7.64386	0	75775	chrX	9104562	9106342	+	NM_001270700	protein_coding	.	RIKEN cDNA 4930402K13 gene
4930404A05Rik	0	0	-7.64386	-7.64386	0	73820	chr16	52799508	52815744	-	NR_040495	lncRNA	.	RIKEN cDNA 4930404A05 gene
4930404H11Rik	0	0	-7.64386	-7.64386	0	73815	chr12	71540607	71556133	+	NR_045941	lncRNA	.	RIKEN cDNA 4930404H11 gene
4930404I05Rik	0.652137	0.348174	-0.605734	-1.50155	-0.895815	67394	chr16	91011249	91016503	+	NR_028368	lncRNA	.	RIKEN cDNA 4930404I05 gene
4930404N11Rik	2.62108	1.93618	1.39291	0.956934	-0.435977	432479	chr10	81364024	81365820	-	NM_001014836	protein_coding	2210409H10Rik| 5730551K18Rik| AI854616	RIKEN cDNA 4930404N11 gene
4930405A10Rik	0	0.0581814	-7.64386	-3.98436	3.6595	74896	chr14	22507174	22542798	-	NR_046307	lncRNA	4930456G20Rik	RIKEN cDNA 4930405A10 gene
4930405A21Rik	0.116015	0.170296	-3.04674	-2.51214	0.534607	74846	chr2	156714539	156720909	-	NR_040505	lncRNA	.	RIKEN cDNA 4930405A21 gene
4930405D11Rik	0	0	-7.64386	-7.64386	0	73922	chr11	90804691	90895152	+	NR_045956	lncRNA	.	RIKEN cDNA 4930405D11 gene
4930405J17Rik	0	0	-7.64386	-7.64386	0	73811	chr10	20199247	20201854	-	NR_045350	lncRNA	.	RIKEN cDNA 4930405J17 gene
4930405L22Rik	0	0	-7.64386	-7.64386	0	78106	chr5	45926822	45932409	-	NR_110478	lncRNA	.	RIKEN cDNA 4930405L22 gene
4930405O22Rik	0	0	-7.64386	-7.64386	0	414079	chr17	63305446	63312973	-	NR_130176	lncRNA	.	RIKEN cDNA 4930405O22 gene
4930406D18Rik	0	0	-7.64386	-7.64386	0	73806	chr3	100426405	100437754	+	NR_040543	lncRNA	.	RIKEN cDNA 4930406D18 gene
4930407G08Rik	0	0	-7.64386	-7.64386	0	77223	chr4	107953932	107960721	+	NR_131071	lncRNA	.	RIKEN cDNA 4930407G08 gene
4930407I10Rik	0	0	-7.64386	-7.64386	0	328573	chr15	82059151	82066538	+	NM_001166475	protein_coding	Gm747	RIKEN cDNA 4930407I10 gene
4930407I19Rik	0	0	-7.64386	-7.64386	0	77198	chr10	66145296	66179514	+	NR_131070	lncRNA	.	RIKEN cDNA 4930407I19 gene
4930412B13Rik	0	0	-7.64386	-7.64386	0	73938	chr2	117821928	117909136	+	NR_040631	lncRNA	.	RIKEN cDNA 4930412B13 gene
4930412C18Rik	0	0	-7.64386	-7.64386	0	320152	chr4	9770585	9823411	+	NR_030693	lncRNA	5730591J02Rik	RIKEN cDNA 4930412C18 gene
4930412O13Rik	0.0954985	0.139021	-3.31475	-2.79565	0.519105	381347	chr2	9881246	9886767	+	NR_024257	lncRNA	ENSMUSG00000075535| Gm10853	RIKEN cDNA 4930412O13 gene
4930413E15Rik	0	0	-7.64386	-7.64386	0	74627	chr5	118952339	118961261	+	NR_040694	lncRNA	.	RIKEN cDNA 4930413E15 gene
4930413F20Rik	0.411381	0.35183	-1.26402	-1.48669	-0.222667	71637	chr15	34675073	34679204	+	NR_045883	lncRNA	.	RIKEN cDNA 4930413F20 gene
4930413G21Rik	8.53266	7.98441	3.09384	2.99809	-0.0957517	73951	chr7	122969058	122970459	-	NR_045614	lncRNA	.	RIKEN cDNA 4930413G21 gene
4930413M19Rik	0	0	-7.64386	-7.64386	0	73889	chr14	50503769	50520943	+	NR_045759	lncRNA	.	RIKEN cDNA 4930413M19 gene
4930414N06Rik	0.113281	0.559841	-3.07971	-0.824083	2.25563	73894	chr19	44972117	44984550	-	NR_040294	lncRNA	.	RIKEN cDNA 4930414N06 gene
4930415F15Rik	0	0	-7.64386	-7.64386	0	73862	chr11	11489266	11515190	+	NM_028669	protein_coding	.	RIKEN cDNA 4930415F15 gene
4930415L06Rik	0	0	-7.64386	-7.64386	0	245511	chrX	89930097	89932852	-	NM_001033880	protein_coding	Ppp4r3cp| Smek3p	RIKEN cDNA 4930415L06 gene
4930415O20Rik	0	0.125901	-7.64386	-2.93345	4.7104	73863	chr15	98571004	98589588	+	NM_001201322	protein_coding	.	RIKEN cDNA 4930415O20 gene
4930417O13Rik	0	0	-7.64386	-7.64386	0	73870	chr6	125265525	125273777	+	NR_015527	lncRNA	.	RIKEN cDNA 4930417O13 gene
4930417O22Rik	0	0	-7.64386	-7.64386	0	73887	chr11	101952421	101960574	+	NR_045806	lncRNA	.	RIKEN cDNA 4930417O22 gene
4930419G24Rik	0	0	-7.64386	-7.64386	0	73874	chr3	33024777	33088607	+	NR_040595	lncRNA	.	RIKEN cDNA 4930419G24 gene
4930423M02Rik	0	0	-7.64386	-7.64386	0	73872	chr4	5632328	5642284	+	NR_038183	lncRNA	.	RIKEN cDNA 4930423M02 gene
4930425K10Rik	0	0	-7.64386	-7.64386	0	73865	chr5	67933612	67943081	-	NR_038182	lncRNA	.	RIKEN cDNA 4930425K10 gene
4930425L21Rik	0	0	-7.64386	-7.64386	0	75024	chr6	135658913	135683391	+	NR_126088	lncRNA	4930473P14Rik	RIKEN cDNA 4930425L21 gene
4930425O10Rik	0	0	-7.64386	-7.64386	0	74635	chr3	138711535	138726984	-	NR_040545	lncRNA	.	RIKEN cDNA 4930425O10 gene
4930426D05Rik	0	0	-7.64386	-7.64386	0	74644	chr18	21651565	21656107	+	NM_001271580	protein_coding	.	RIKEN cDNA 4930426D05 gene
4930426L09Rik	0.0357515	0	-4.617	-7.64386	-3.02685	74629	chr2	18998319	18999804	+	NR_024323	lncRNA	.	RIKEN cDNA 4930426L09 gene
4930427A07Rik	14.2834	11.343	3.83677	3.50437	-0.332406	104732	chr12	113156421	113165458	+	NM_134041	protein_coding	AA536649| mFLJ00116	RIKEN cDNA 4930427A07 gene
4930428D20Rik	0	0	-7.64386	-7.64386	0	78110	chr16	69796141	69800381	-	NR_130991	lncRNA	.	RIKEN cDNA 4930428D20 gene
4930428E07Rik	0	0	-7.64386	-7.64386	0	73867	chr12	38552809	38614521	-	NR_045943	lncRNA	.	RIKEN cDNA 4930428E07 gene
4930428G15Rik	0	0	-7.64386	-7.64386	0	73856	chr9	115336161	115341924	+	NR_040730	lncRNA	.	RIKEN cDNA 4930428G15 gene
4930428O21Rik	0	0	-7.64386	-7.64386	0	654809	chr5	107698212	107703480	-	NR_045871	lncRNA	.	RIKEN cDNA 4930428O21 gene
4930429B21Rik	0.262382	0.331884	-1.90303	-1.56968	0.33335	67576	chr3	32365489	32367438	+	NR_027966	lncRNA	.	RIKEN cDNA 4930429B21 gene
4930429D17Rik	0	0	-7.64386	-7.64386	0	74624	chr5	103230375	103299029	-	NR_040699	lncRNA	.	RIKEN cDNA 4930429D17 gene
4930429F11Rik	0	0	-7.64386	-7.64386	0	74622	chr17	79475624	79477885	-	NR_033463	lncRNA	.	RIKEN cDNA 4930429F11 gene
4930429F24Rik	0.0348263	0.0339381	-4.65013	-4.68267	-0.032539	74633	chr9	79793641	79803235	+	NR_040734	lncRNA	.	RIKEN cDNA 4930429F24 gene
4930430A15Rik	0	0	-7.64386	-7.64386	0	67575	chr2	111193254	111229600	-	NM_026248	protein_coding	RP23-9A5.2	RIKEN cDNA 4930430A15 gene
4930430F08Rik	7.2576	9.96876	2.86049	3.31814	0.457651	68281	chr10	100572274	100589259	-	NM_175128	protein_coding	4930571E09Rik| A730088G13Rik| AW551239| C430008C19Rik	RIKEN cDNA 4930430F08 gene
4930430F21Rik	0	0	-7.64386	-7.64386	0	73784	chr15	31039126	31043331	+	NR_045186	lncRNA	.	RIKEN cDNA 4930430F21 gene
4930430J02Rik	0	0	-7.64386	-7.64386	0	73772	chr9	57391070	57400364	+	NR_040729	lncRNA	.	RIKEN cDNA 4930430J02 gene
4930431F12Rik	0.0890242	0.0432788	-3.41082	-4.37247	-0.961642	75783	chr5	44966201	44978805	+	NR_073013	lncRNA	.	RIKEN cDNA 4930431F12 gene
4930431P03Rik	0.0220416	0	-5.20868	-7.64386	-2.43518	73895	chr14	44954900	44961307	-	NR_045059	lncRNA	.	RIKEN cDNA 4930431P03 gene
4930432J09Rik	0	0	-7.64386	-7.64386	0	73877	chr14	103977628	104027142	-	NR_045953	lncRNA	.	RIKEN cDNA 4930432J09 gene
4930432K21Rik	0.716033	1.03932	-0.471863	0.0625638	0.534427	74666	chr8	84148038	84172597	+	NM_029045	protein_coding	.	RIKEN cDNA 4930432K21 gene
4930432M17Rik	0	0	-7.64386	-7.64386	0	619318	chr3	121670763	121682982	+	NM_001033814	protein_coding	.	RIKEN cDNA 4930432M17 gene
4930433B08Rik	0	0	-7.64386	-7.64386	0	73959	chr3	18468285	18480477	-	NR_040544	lncRNA	.	RIKEN cDNA 4930433B08 gene
4930433I11Rik	0	0	-7.64386	-7.64386	0	243944	chr7	40987609	40994833	+	NM_207248	protein_coding	Gm481	RIKEN cDNA 4930433I11 gene
4930433N12Rik	0	0	-7.64386	-7.64386	0	114673	chr9	3190269	3199813	-	NR_027988	lncRNA	.	RIKEN cDNA 4930433N12 gene
4930434J06Rik	0	0	-7.64386	-7.64386	0	74667	chr14	71856709	71920438	+	NR_046274	lncRNA	.	RIKEN cDNA 4930434J06 gene
4930435E12Rik	0	0	-7.64386	-7.64386	0	74663	chr16	38812205	38828749	-	NM_029042	protein_coding	TSCPA	RIKEN cDNA 4930435E12 gene
4930438E09Rik	0	0	-7.64386	-7.64386	0	73977	chr14	67332042	67397742	-	NR_045961	lncRNA	.	RIKEN cDNA 4930438E09 gene
4930440C22Rik	0	0	-7.64386	-7.64386	0	74689	chr1	94797442	94802472	+	NR_040473	lncRNA	.	RIKEN cDNA 4930440C22 gene
4930440I19Rik	0	0	-7.64386	-7.64386	0	78158	chr2	78051177	78194430	+	NR_108098	lncRNA	.	RIKEN cDNA 4930440I19 gene
4930441H08Rik	0	0	-7.64386	-7.64386	0	78156	chr7	71909695	71939191	+	NR_130995	lncRNA	.	RIKEN cDNA 4930441H08 gene
4930441J16Rik	0	0	-7.64386	-7.64386	0	73962	chr2	74298940	74307717	-	NR_040501	lncRNA	Astx1a| Astx1b| Astx1c	RIKEN cDNA 4930441J16 gene
4930442J19Rik	0	0	-7.64386	-7.64386	0	74660	chr2	151302039	151316003	+	NR_040747	lncRNA	1700029E19Rik| Gm14152| OTTMUSG00000015807	RIKEN cDNA 4930442J19 gene
4930442L01Rik	0	0	-7.64386	-7.64386	0	67583	chr3	96829826	96832070	-	NR_015596	lncRNA	.	RIKEN cDNA 4930442L01 gene
4930443O20Rik	0.0369946	0.0721304	-4.57365	-3.69656	0.877096	74687	chr2	85073614	85086461	-	NR_040504	lncRNA	.	RIKEN cDNA 4930443O20 gene
4930444F02Rik	0	0	-7.64386	-7.64386	0	73968	chr10	18797299	18831930	-	NR_102728	lncRNA	1700010L24Rik| mpiR	RIKEN cDNA 4930444F02 gene
4930444G20Rik	0.0292398	0	-4.86818	-7.64386	-2.77567	114671	chr10	22066309	22068079	-	NM_053264	protein_coding	.	RIKEN cDNA 4930444G20 gene
4930444M15Rik	0.157579	0	-2.62079	-7.64386	-5.02307	75789	chr14	76514558	76520855	-	NR_045660	lncRNA	.	RIKEN cDNA 4930444M15 gene
4930444P10Rik	0.251428	0.108761	-1.96337	-3.13592	-1.17255	75799	chr1	16065979	16093325	-	NM_001243238	protein_coding	.	RIKEN cDNA 4930444P10 gene
4930445N18Rik	0	0	-7.64386	-7.64386	0	73985	chr18	82855897	82859162	+	NR_125720	lncRNA	3010027C24Rik	RIKEN cDNA 4930445N18 gene
4930447A16Rik	0	0	-7.64386	-7.64386	0	74892	chr15	37425554	37440644	+	NM_029113	protein_coding	.	RIKEN cDNA 4930447A16 gene
4930447C04Rik	0	0	-7.64386	-7.64386	0	75801	chr12	72881109	72917765	-	NM_029444	protein_coding	4921504I02Rik| A930035O15Rik| Six6as| Six6OS| Six6os1	RIKEN cDNA 4930447C04 gene
4930447F24Rik	1.4905	1.70397	0.580628	0.773127	0.192499	76873	chr9	108133718	108138567	+	NR_126078	lncRNA	.	RIKEN cDNA 4930447F24 gene
4930447J18Rik	0	0	-7.64386	-7.64386	0	73961	chr14	47898864	47944189	+	NR_045959	lncRNA	4930425M13Rik	RIKEN cDNA 4930447J18 gene
4930447K03Rik	0.0553411	0	-4.05072	-7.64386	-3.59314	432745	chr13	34084155	34113272	-	NR_046184	lncRNA	.	RIKEN cDNA 4930447K03 gene
4930447M23Rik	0	0.0208649	-7.64386	-5.27286	2.371	108871	chr2	19344317	19352251	+	NR_126563	lncRNA	.	RIKEN cDNA 4930447M23 gene
4930447N08Rik	0	0	-7.64386	-7.64386	0	71647	chr3	122795091	122801980	-	NR_045168	lncRNA	.	RIKEN cDNA 4930447N08 gene
4930448C13Rik	0	0	-7.64386	-7.64386	0	73972	chr12	14996389	15050389	-	NR_045960	lncRNA	.	RIKEN cDNA 4930448C13 gene
4930448F12Rik	0	0	-7.64386	-7.64386	0	73992	chr13	18084947	18100202	-	NR_046032	lncRNA	.	RIKEN cDNA 4930448F12 gene
4930448H16Rik	0	0	-7.64386	-7.64386	0	74872	chr5	143226992	143234748	+	NR_040700	lncRNA	.	RIKEN cDNA 4930448H16 gene
4930448I06Rik	0	0	-7.64386	-7.64386	0	74897	chr1	41167560	41181252	-	NR_040475	lncRNA	.	RIKEN cDNA 4930448I06 gene
4930448I18Rik	0	0	-7.64386	-7.64386	0	73965	chr5	50151333	50156092	+	NR_040696	lncRNA	.	RIKEN cDNA 4930448I18 gene
4930448K20Rik	0	0	-7.64386	-7.64386	0	74662	chr4	9915965	9917397	-	NR_004448	misc_RNA	1700009K09Rik	RIKEN cDNA 4930448K20 gene
4930449E01Rik	0	0	-7.64386	-7.64386	0	74864	chr14	105498788	105505628	+	NR_045921	lncRNA	.	RIKEN cDNA 4930449E01 gene
4930449E18Rik	0	0	-7.64386	-7.64386	0	78120	chr19	57273960	57277052	+	NR_045319	lncRNA	.	RIKEN cDNA 4930449E18 gene
4930449I24Rik	0	0	-7.64386	-7.64386	0	67410	chr5	146502399	146505183	+	NM_026136	protein_coding	.	RIKEN cDNA 4930449I24 gene
4930451G09Rik	0.185513	0.336025	-2.39204	-1.55205	0.839988	74684	chr16	4964288	4978054	+	NM_001271586	misc_RNA	.	RIKEN cDNA 4930451G09 gene
4930451I11Rik	0	0	-7.64386	-7.64386	0	78118	chr7	126830474	126831496	-	NM_183131	protein_coding	.	RIKEN cDNA 4930451I11 gene
4930452A19Rik	0	0	-7.64386	-7.64386	0	71092	chr17	9750752	9775866	-	NR_045433	lncRNA	4933424P20Rik	RIKEN cDNA 4930452A19 gene
4930452B06Rik	0.323627	0.209612	-1.60548	-2.2202	-0.61472	74430	chr14	8431172	8666290	-	NM_028934	protein_coding	4933406L09Rik| AI854000	RIKEN cDNA 4930452B06 gene
4930452G13Rik	0	0	-7.64386	-7.64386	0	73989	chr14	79702920	79712930	+	NR_045060	lncRNA	.	RIKEN cDNA 4930452G13 gene
4930452N14Rik	0	0.222257	-7.64386	-2.1376	5.50625	78112	chr1	154241521	154256906	-	NR_040629	lncRNA	.	RIKEN cDNA 4930452N14 gene
4930453H23Rik	0	0	-7.64386	-7.64386	0	100503481	chrX	21206580	21221665	-	NM_001252013	protein_coding	.	RIKEN cDNA 4930453H23 gene
4930453L07Rik	0	0	-7.64386	-7.64386	0	74688	chr8	9144669	9149050	+	NR_073360	lncRNA	.	RIKEN cDNA 4930453L07 gene
4930453N24Rik	12.2442	14.5636	3.61462	3.86479	0.250175	67609	chr16	64766105	64770939	-	NM_026273	protein_coding	AI649104| din	RIKEN cDNA 4930453N24 gene
4930455B14Rik	0	0	-7.64386	-7.64386	0	74859	chr14	8666390	8673378	+	NR_045968	lncRNA	1700027C12Rik	RIKEN cDNA 4930455B14 gene
4930455C13Rik	2.71214	2.7639	1.44209	1.46931	0.027224	73990	chr10	21319088	21342055	-	NR_045352	lncRNA	.	RIKEN cDNA 4930455C13 gene
4930455D15Rik	0	0	-7.64386	-7.64386	0	75795	chr18	32663642	32837287	-	NR_045381	lncRNA	.	RIKEN cDNA 4930455D15 gene
4930455F16Rik	0	0	-7.64386	-7.64386	0	76397	chr16	4219912	4229116	-	NR_040572	lncRNA	1700013J11Rik	RIKEN cDNA 4930455F16 gene
4930455G09Rik	0.757423	1.70964	-0.391336	0.777906	1.16924	78917	chr4	142017898	142028995	+	NR_131014	lncRNA	.	RIKEN cDNA 4930455G09 gene
4930455H04Rik	0	0	-7.64386	-7.64386	0	74654	chr3	116968267	116984406	+	NR_040596	lncRNA	.	RIKEN cDNA 4930455H04 gene
4930455J16Rik	0	0	-7.64386	-7.64386	0	67585	chr13	58741074	58762311	-	NR_045469	lncRNA	.	RIKEN cDNA 4930455J16 gene
4930456L15Rik	0	0	-7.64386	-7.64386	0	71650	chr4	103290959	103311832	+	NR_045887	lncRNA	.	RIKEN cDNA 4930456L15 gene
4930459C07Rik	0	0	-7.64386	-7.64386	0	74881	chr10	96226207	96248708	+	NR_110448	lncRNA	.	RIKEN cDNA 4930459C07 gene
4930459L07Rik	0	0	-7.64386	-7.64386	0	78163	chr5	58443240	58452998	-	NR_046190	lncRNA	.	RIKEN cDNA 4930459L07 gene
4930461G14Rik	9.01116	14.5723	3.17251	3.86565	0.693139	74879	chr9	58455173	58469623	+	NR_040736	lncRNA	.	RIKEN cDNA 4930461G14 gene
4930463O16Rik	0	0	-7.64386	-7.64386	0	75804	chr10	84488293	84497676	+	NR_108059	lncRNA	.	RIKEN cDNA 4930463O16 gene
4930465K10Rik	0.0866742	0.0845935	-3.44734	-3.48046	-0.0331217	67640	chr18	77714184	77715445	+	NR_027978	lncRNA	.	RIKEN cDNA 4930465K10 gene
4930465M20Rik	0	0	-7.64386	-7.64386	0	74968	chr12	107723743	107735488	-	NR_045973	lncRNA	4930431H15Rik	RIKEN cDNA 4930465M20 gene
4930467D21Rik	0	0.0159349	-7.64386	-5.57795	2.06591	75814	chr5	97392417	97588126	+	NR_045981	lncRNA	4930448L09Rik| BB013444	RIKEN cDNA 4930467D21 gene
4930467E23Rik	0	0	-7.64386	-7.64386	0	626415	chr8	19729576	19753602	+	NM_001039553	protein_coding	ENSMUSG00000074453| OTTMUSG00000018948| TSAP	RIKEN cDNA 4930467E23 gene
4930467K11Rik	0	0	-7.64386	-7.64386	0	74928	chr10	57478383	57486353	-	NR_045353	lncRNA	.	RIKEN cDNA 4930467K11 gene
4930469G21Rik	0	0	-7.64386	-7.64386	0	100502590	chr1	161156843	161159314	-	NM_001195189	protein_coding	.	RIKEN cDNA 4930469G21 gene
4930470H14Rik	4.16276	4.57789	2.05927	2.19626	0.136985	75815	chr17	4044658	4082995	-	NR_045764	lncRNA	.	RIKEN cDNA 4930470H14 gene
4930470O06Rik	0	0	-7.64386	-7.64386	0	75017	chr8	59825649	59844721	+	NR_126087	lncRNA	.	RIKEN cDNA 4930470O06 gene
4930470P17Rik	0	0	-7.64386	-7.64386	0	67637	chr2	170579418	170602017	-	NR_027825	lncRNA	RP23-43J11.2	RIKEN cDNA 4930470P17 gene
4930471C04Rik	0	0	-7.64386	-7.64386	0	78176	chr14	64099295	64104235	-	NR_046192	lncRNA	.	RIKEN cDNA 4930471C04 gene
4930471G03Rik	0	0.097467	-7.64386	-3.28677	4.35709	74966	chr18	36106203	36109954	+	NR_015571	lncRNA	1700007N01Rik	RIKEN cDNA 4930471G03 gene
4930471M09Rik	0	0	-7.64386	-7.64386	0	75787	chr6	91430460	91440854	-	NR_045980	lncRNA	4930427C17Rik	RIKEN cDNA 4930471M09 gene
4930473A02Rik	0.0380586	0.111292	-4.53755	-3.10418	1.43338	321014	chr2	130543791	130563749	-	NR_040348	lncRNA	.	RIKEN cDNA 4930473A02 gene
4930473O22Rik	0	0	-7.64386	-7.64386	0	75025	chr10	97590984	97596931	-	NR_045356	lncRNA	.	RIKEN cDNA 4930473O22 gene
4930474G06Rik	0	0	-7.64386	-7.64386	0	320624	chr18	28560164	28998176	+	NR_045398	lncRNA	.	RIKEN cDNA 4930474G06 gene
4930474H20Rik	0	0	-7.64386	-7.64386	0	74967	chr14	90126891	90269760	+	NR_045712	lncRNA	.	RIKEN cDNA 4930474H20 gene
4930474M22Rik	0	0	-7.64386	-7.64386	0	74917	chr17	14389107	14398942	-	NR_027986	lncRNA	.	RIKEN cDNA 4930474M22 gene
4930474N05Rik	0	0	-7.64386	-7.64386	0	218921	chr14	36094965	36096855	+	NM_175008	protein_coding	.	RIKEN cDNA 4930474N05 gene
4930474N09Rik	0	0	-7.64386	-7.64386	0	67639	chr12	99161277	99162808	-	NR_038130	lncRNA	.	RIKEN cDNA 4930474N09 gene
4930477N07Rik	0	0	-7.64386	-7.64386	0	74905	chr10	119320234	119331862	+	NR_126085	lncRNA	.	RIKEN cDNA 4930477N07 gene
4930478L05Rik	0	0.0266025	-7.64386	-4.98382	2.66004	75818	chr16	78560316	78564869	+	NR_040569	lncRNA	.	RIKEN cDNA 4930478L05 gene
4930478P22Rik	0	0	-7.64386	-7.64386	0	74429	chr5	35361553	35367677	+	NR_046060	lncRNA	4933405A14Rik	RIKEN cDNA 4930478P22 gene
4930479D17Rik	0	0	-7.64386	-7.64386	0	74925	chr6	146657218	146665403	+	NR_046277	lncRNA	.	RIKEN cDNA 4930479D17 gene
4930480E11Rik	0	0	-7.64386	-7.64386	0	74910	chrX	78369643	78371128	+	NM_001177966	protein_coding	.	RIKEN cDNA 4930480E11 gene
4930480G23Rik	0	0	-7.64386	-7.64386	0	74988	chr4	19979445	20005739	-	NR_040768	lncRNA	.	RIKEN cDNA 4930480G23 gene
4930480K15Rik	0	0	-7.64386	-7.64386	0	78800	chr17	90861169	90867102	+	NR_045463	lncRNA	.	RIKEN cDNA 4930480K15 gene
4930480K23Rik	0.146655	0.113918	-2.72114	-3.07196	-0.350826	75016	chr14	69732784	69767113	+	NR_130166	lncRNA	.	RIKEN cDNA 4930480K23 gene
4930480M12Rik	0	0	-7.64386	-7.64386	0	74930	chr12	26211267	26240707	+	NR_046278	lncRNA	.	RIKEN cDNA 4930480M12 gene
4930481A15Rik	0.29967	0.0835565	-1.71468	-3.49726	-1.78258	74931	chr19	5406815	5422847	+	NR_027938	lncRNA	.	RIKEN cDNA 4930481A15 gene
4930482G09Rik	0	0	-7.64386	-7.64386	0	75001	chr3	153147943	153152108	-	NR_108044	lncRNA	.	RIKEN cDNA 4930482G09 gene
4930483J18Rik	0.309231	0	-1.6701	-7.64386	-5.97375	67638	chr15	81190853	81192757	+	NR_015603	lncRNA	.	RIKEN cDNA 4930483J18 gene
4930483K19Rik	0.443882	0.779955	-1.15559	-0.349318	0.806274	74953	chr10	76545871	76562226	-	NR_045354	lncRNA	.	RIKEN cDNA 4930483K19 gene
4930483O08Rik	0	0.054329	-7.64386	-4.07512	3.56874	74970	chr7	133128251	133142457	+	NR_046279	lncRNA	.	RIKEN cDNA 4930483O08 gene
4930484H19Rik	0	0	-7.64386	-7.64386	0	75813	chr10	126788851	126793710	-	NR_131015	lncRNA	.	RIKEN cDNA 4930484H19 gene
4930486F22Rik	0	0	-7.64386	-7.64386	0	78170	chr10	86095854	86113585	+	NR_038024	lncRNA	.	RIKEN cDNA 4930486F22 gene
4930486I03Rik	0.0789195	0.077523	-3.57485	-3.59906	-0.0242098	75028	chr1	20356454	20392300	+	NR_045734	lncRNA	.	RIKEN cDNA 4930486I03 gene
4930486L24Rik	5.60762	3.28901	2.48867	1.71984	-0.768829	214639	chr13	60842612	60864416	-	NM_178098	protein_coding	AW545031	RIKEN cDNA 4930486L24 gene
4930487D11Rik	0	0	-7.64386	-7.64386	0	78172	chr5	38344389	38349197	+	NR_046191	lncRNA	.	RIKEN cDNA 4930487D11 gene
4930487H11Rik	0.332148	0.260426	-1.56855	-1.91362	-0.345072	74992	chr1	62790918	62794732	-	NR_040601	lncRNA	.	RIKEN cDNA 4930487H11 gene
4930488B22Rik	0	0	-7.64386	-7.64386	0	74971	chr1	184712497	184718989	+	NR_040627	lncRNA	.	RIKEN cDNA 4930488B22 gene
4930488L21Rik	0	0	-7.64386	-7.64386	0	75809	chr8	93811694	93813555	-	NR_026888	lncRNA	4930452J22Rik	RIKEN cDNA 4930488L21 gene
4930500F04Rik	0	0	-7.64386	-7.64386	0	70969	chr5	149847747	149864280	+	NR_045758	lncRNA	4931407C17Rik	RIKEN cDNA 4930500F04 gene
4930500L23Rik	0	0	-7.64386	-7.64386	0	74973	chr5	139523751	139541339	+	NR_040701	lncRNA	.	RIKEN cDNA 4930500L23 gene
4930502A04Rik	0	0	-7.64386	-7.64386	0	74951	chr9	68470902	68520200	-	NR_040737	lncRNA	.	RIKEN cDNA 4930502A04 gene
4930502E09Rik	0.0833778	0.0819688	-3.50017	-3.52336	-0.0231861	74995	chr11	84829178	84830868	+	NR_046281	lncRNA	.	RIKEN cDNA 4930502E09 gene
4930502E18Rik	0	0	-7.64386	-7.64386	0	75013	chrX	53724831	53738222	+	NM_029142	protein_coding	Ct55	RIKEN cDNA 4930502E18 gene
4930503B20Rik	0	0.0554162	-7.64386	-4.04892	3.59494	75015	chr3	146646259	146651317	-	NM_029144	protein_coding	1700013A07Rik| 1700095G21Rik| 4930483N21Rik| Gm1652| Samd13	RIKEN cDNA 4930503B20 gene
4930503E14Rik	0.845128	0.329872	-0.234248	-1.57832	-1.34407	74954	chr14	44163167	44171371	-	NM_029131	protein_coding	.	RIKEN cDNA 4930503E14 gene
4930503E24Rik	0	0	-7.64386	-7.64386	0	75030	chr10	124469074	124524488	+	NR_028310	misc_RNA	.	RIKEN cDNA 4930503E24 gene
4930503F20Rik	0	0	-7.64386	-7.64386	0	218902	chr14	33808072	33811283	-	NR_131113	lncRNA	4930453C15	RIKEN cDNA 4930503F20 gene
4930503H13Rik	0	0	-7.64386	-7.64386	0	74941	chrX	156539483	156540117	+	NR_033598	misc_RNA	.	RIKEN cDNA 4930503H13 gene
4930503L19Rik	9.9198	8.87627	3.31104	3.15077	-0.160272	269033	chr18	70453140	70472480	-	NM_172967	protein_coding	9930107F24| BB148262| Lars| Las2	RIKEN cDNA 4930503L19 gene
4930503O07Rik	0	0	-7.64386	-7.64386	0	74942	chr1	194212187	194222759	-	NR_040477	lncRNA	.	RIKEN cDNA 4930503O07 gene
4930504C09Rik	0	0	-7.64386	-7.64386	0	75076	chr15	69270533	69274718	+	NR_130983	lncRNA	.	RIKEN cDNA 4930504C09 gene
4930504O13Rik	0	0	-7.64386	-7.64386	0	403200	chr11	58446143	58452966	-	NM_207527	protein_coding	Gm524	RIKEN cDNA 4930504O13 gene
4930505A04Rik	0	0	-7.64386	-7.64386	0	75087	chr11	30426006	30471829	-	NM_001100394	protein_coding	.	RIKEN cDNA 4930505A04 gene
4930505G20Rik	0	0	-7.64386	-7.64386	0	75088	chr14	115396551	115409552	-	NR_045761	lncRNA	.	RIKEN cDNA 4930505G20 gene
4930505K13Rik	0	0	-7.64386	-7.64386	0	75073	chr7	120156115	120166001	+	NR_130979	lncRNA	.	RIKEN cDNA 4930505K13 gene
4930505K14Rik	0	0	-7.64386	-7.64386	0	78015	chr5	148777963	148783080	+	NR_131106	lncRNA	.	RIKEN cDNA 4930505K14 gene
4930506A18Rik	0.0576781	0	-3.99589	-7.64386	-3.64796	75044	chr8	106282229	106335754	+	NR_126090	lncRNA	.	RIKEN cDNA 4930506A18 gene
4930506C21Rik	0.357099	0.0582579	-1.46554	-3.98261	-2.51707	75060	chr17	8293366	8311118	-	NR_073374	lncRNA	.	RIKEN cDNA 4930506C21 gene
4930507D05Rik	1.51915	1.09675	0.608005	0.139797	-0.468208	74706	chr10	62449160	62451353	+	NR_027926	lncRNA	.	RIKEN cDNA 4930507D05 gene
4930507D10Rik	0	0	-7.64386	-7.64386	0	75043	chr11	80850381	80858300	-	NR_110449	lncRNA	.	RIKEN cDNA 4930507D10 gene
4930509E16Rik	0	0.0907439	-7.64386	-3.38468	4.25918	75115	chr9	72518250	72531858	-	NR_045735	lncRNA	.	RIKEN cDNA 4930509E16 gene
4930509J09Rik	0	0	-7.64386	-7.64386	0	74693	chr3	73351206	73481651	-	NR_040547	lncRNA	.	RIKEN cDNA 4930509J09 gene
4930509K18Rik	0	0	-7.64386	-7.64386	0	75819	chr4	40313232	40317719	+	NR_040663	lncRNA	.	RIKEN cDNA 4930509K18 gene
4930511A02Rik	0	0	-7.64386	-7.64386	0	74712	chr12	11438233	11444812	+	NR_045966	lncRNA	.	RIKEN cDNA 4930511A02 gene
4930511A08Rik	0.241138	0.972403	-2.02246	-0.0329746	1.98949	78178	chr6	94132923	94237442	-	NR_130996	lncRNA	.	RIKEN cDNA 4930511A08 gene
4930511E03Rik	0	0	-7.64386	-7.64386	0	78773	chr6	94943834	94951545	+	NR_040761	lncRNA	.	RIKEN cDNA 4930511E03 gene
4930511M06Rik	0.831996	0.776155	-0.256707	-0.356319	-0.0996119	75084	chr18	57545361	57552395	-	NR_027945	lncRNA	.	RIKEN cDNA 4930511M06 gene
4930512B01Rik	0	0	-7.64386	-7.64386	0	74724	chr12	69790344	69841880	+	NR_033573	lncRNA	4930472D12Rik	RIKEN cDNA 4930512B01 gene
4930512J16Rik	0	0	-7.64386	-7.64386	0	75131	chr6	89269511	89285725	-	NR_131021	lncRNA	.	RIKEN cDNA 4930512J16 gene
4930512M02Rik	0.087524	0.0861097	-3.43403	-3.45625	-0.022223	102631730	chr11	11589223	11627838	-	NM_001305143	protein_coding	.	RIKEN cDNA 4930512M02 gene
4930513D17Rik	0	0.0448666	-7.64386	-4.32578	3.31807	75095	chr5	39461749	39603574	-	NR_045416	lncRNA	.	RIKEN cDNA 4930513D17 gene
4930513N10Rik	0.440481	0.342336	-1.16656	-1.5256	-0.359032	319960	chr8	95806830	95821728	+	NR_015574	lncRNA	.	RIKEN cDNA 4930513N10 gene
4930513O06Rik	0	0	-7.64386	-7.64386	0	75125	chrX	139086243	139093403	+	NM_029174	protein_coding	.	RIKEN cDNA 4930513O06 gene
4930515B02Rik	0	0	-7.64386	-7.64386	0	75128	chr4	140872693	140878057	+	NR_040654	lncRNA	.	RIKEN cDNA 4930515B02 gene
4930515G01Rik	0.613107	0.769421	-0.694071	-0.36881	0.325261	67642	chr5	114773733	114774983	-	NR_027872	lncRNA	.	RIKEN cDNA 4930515G01 gene
4930515G16Rik	0	0	-7.64386	-7.64386	0	75070	chr6	67565234	67565699	-	NR_003100	misc_RNA	.	RIKEN cDNA 4930515G16 gene
4930515L03Rik	0	0	-7.64386	-7.64386	0	75069	chr2	16918678	17013726	-	NR_040632	lncRNA	.	RIKEN cDNA 4930515L03 gene
4930515L19Rik	0	0	-7.64386	-7.64386	0	75133	chrX	46267559	46328911	-	NR_045440	lncRNA	.	RIKEN cDNA 4930515L19 gene
4930517E11Rik	0	0	-7.64386	-7.64386	0	74702	chr2	124123636	124129956	-	NR_040611	lncRNA	.	RIKEN cDNA 4930517E11 gene
4930517M08Rik	0	0	-7.64386	-7.64386	0	75117	chr17	4634980	4637477	+	NR_130984	lncRNA	.	RIKEN cDNA 4930517M08 gene
4930518J21Rik	0	0	-7.64386	-7.64386	0	75123	chr8	56465622	56484968	-	NR_131020	lncRNA	.	RIKEN cDNA 4930518J21 gene
4930518P08Rik	0	0	-7.64386	-7.64386	0	71654	chr13	50753393	50765248	-	NR_045364	lncRNA	.	RIKEN cDNA 4930518P08 gene
4930519D14Rik	0	0	-7.64386	-7.64386	0	75090	chr13	30615043	30624258	+	NR_045975	lncRNA	.	RIKEN cDNA 4930519D14 gene
4930519F09Rik	0.239231	0.233103	-2.03368	-2.07034	-0.0366605	114676	chr10	28921963	28923507	-	NR_033601	misc_RNA	.	RIKEN cDNA 4930519F09 gene
4930519F16Rik	0	0	-7.64386	-7.64386	0	75106	chrX	103232281	103256606	-	NM_029170	protein_coding	Ppnx	RIKEN cDNA 4930519F16 gene
4930519F24Rik	0	0	-7.64386	-7.64386	0	108970	chr9	100022300	100034670	+	NR_040763	lncRNA	.	RIKEN cDNA 4930519F24 gene
4930519G04Rik	0.249369	0.218319	-1.97501	-2.16282	-0.187817	67593	chr5	114853714	114883879	+	NM_026263	protein_coding	1700014B12Rik	RIKEN cDNA 4930519G04 gene
4930519H02Rik	0	0	-7.64386	-7.64386	0	75058	chr5	15863928	15883766	-	NR_045974	lncRNA	.	RIKEN cDNA 4930519H02 gene
4930519K11Rik	0	0	-7.64386	-7.64386	0	78019	chr14	24004991	24005837	+	NR_131107	lncRNA	.	RIKEN cDNA 4930519K11 gene
4930520O04Rik	0.618447	0.453367	-0.681661	-1.12542	-0.443764	75116	chr9	114368324	114377238	+	NR_040383	lncRNA	.	RIKEN cDNA 4930520O04 gene
4930520P13Rik	0	0	-7.64386	-7.64386	0	75086	chr13	70232822	70248122	+	NR_036596	lncRNA	.	RIKEN cDNA 4930520P13 gene
4930521E06Rik	0	0	-7.64386	-7.64386	0	75066	chr1	44739675	44744949	-	NR_040602	lncRNA	.	RIKEN cDNA 4930521E06 gene
4930522H14Rik	0	0	-7.64386	-7.64386	0	67646	chr4	109505332	109531297	-	NM_001199090	protein_coding	1700007J23Rik	RIKEN cDNA 4930522H14 gene
4930522O17Rik	0	0	-7.64386	-7.64386	0	78180	chr4	53246196	53251120	+	NR_040665	lncRNA	.	RIKEN cDNA 4930522O17 gene
4930523C07Rik	3.95741	3.96672	1.98638	1.98976	0.00338575	67647	chr1	160044380	160078586	+	NR_028111	protein_coding	.	RIKEN cDNA 4930523C07 gene
4930523O13Rik	0	0	-7.64386	-7.64386	0	74726	chr15	46435866	46496179	-	NR_040451	lncRNA	4921524H24Rik	RIKEN cDNA 4930523O13 gene
4930524B15Rik	0	0	-7.64386	-7.64386	0	67592	chr11	31965633	31979651	+	NM_026262	protein_coding	.	RIKEN cDNA 4930524B15 gene
4930524B17Rik	0	0	-7.64386	-7.64386	0	74725	chr6	19247899	19278843	-	NR_126084	lncRNA	.	RIKEN cDNA 4930524B17 gene
4930524C18Rik	0	0	-7.64386	-7.64386	0	75822	chr14	114831965	114861327	+	NR_045661	lncRNA	.	RIKEN cDNA 4930524C18 gene
4930524N10Rik	0	0	-7.64386	-7.64386	0	75071	chrX	154339225	154343392	-	NM_001256259	protein_coding	.	RIKEN cDNA 4930524N10 gene
4930524O05Rik	0	0	-7.64386	-7.64386	0	75096	chr19	10645694	10648053	-	NR_045316	lncRNA	.	RIKEN cDNA 4930524O05 gene
4930524O08Rik	0	0	-7.64386	-7.64386	0	74700	chr9	89826519	89864028	+	NR_040735	lncRNA	.	RIKEN cDNA 4930524O08 gene
4930525C09Rik	0	0	-7.64386	-7.64386	0	78127	chr10	97714772	97753702	+	NR_130992	lncRNA	.	RIKEN cDNA 4930525C09 gene
4930525D18Rik	0	0	-7.64386	-7.64386	0	75100	chr9	114341111	114364627	-	NR_040738	lncRNA	.	RIKEN cDNA 4930525D18 gene
4930525G20Rik	0.115174	0.127847	-3.0568	-2.91216	0.144641	320163	chr13	67796594	67830985	-	NR_045194	lncRNA	.	RIKEN cDNA 4930525G20 gene
4930526H09Rik	0	0	-7.64386	-7.64386	0	102636142	chr13	110882411	110903846	-	NR_131194	lncRNA	.	RIKEN cDNA 4930526H09 gene
4930526I15Rik	4.9774	4.88367	2.31684	2.28944	-0.0273988	75135	chr9	124423251	124424856	+	NR_027950	lncRNA	1600027J15Rik	RIKEN cDNA 4930526I15 gene
4930526L06Rik	0	0	-7.64386	-7.64386	0	75138	chr19	11196817	11299884	+	NR_045317	lncRNA	.	RIKEN cDNA 4930526L06 gene
4930527F14Rik	0	0	-7.64386	-7.64386	0	67651	chr14	45543710	45562876	+	NR_045809	lncRNA	.	RIKEN cDNA 4930527F14 gene
4930527G23Rik	0	0	-7.64386	-7.64386	0	78199	chr18	29442200	29466107	+	NR_045395	lncRNA	.	RIKEN cDNA 4930527G23 gene
4930528A17Rik	0.047765	0.0464552	-4.24427	-4.28054	-0.0362644	67735	chr4	21846327	21848448	-	NR_028384	lncRNA	.	RIKEN cDNA 4930528A17 gene
4930528D03Rik	0.177209	0.0432463	-2.45633	-4.37344	-1.9171	75223	chr13	59733650	59737470	+	NR_045977	lncRNA	.	RIKEN cDNA 4930528D03 gene
4930528G23Rik	0	0	-7.64386	-7.64386	0	75831	chr6	148659978	148678000	-	NR_131024	lncRNA	.	RIKEN cDNA 4930528G23 gene
4930528H21Rik	0	0	-7.64386	-7.64386	0	78034	chr6	4031841	4047584	-	NR_131108	lncRNA	.	RIKEN cDNA 4930528H21 gene
4930528P14Rik	0	0	-7.64386	-7.64386	0	78193	chr2	115329266	115344280	-	NR_040516	lncRNA	.	RIKEN cDNA 4930528P14 gene
4930529C04Rik	0.0275225	0.0267191	-4.94242	-4.9785	-0.0360863	619677	chr3	91071662	91075192	+	NR_033593	misc_RNA	.	RIKEN cDNA 4930529C04 gene
4930529K09Rik	0	0	-7.64386	-7.64386	0	75155	chr14	86245970	86262042	+	NR_040457	lncRNA	4930507G21Rik	RIKEN cDNA 4930529K09 gene
4930529L06Rik	0	0	-7.64386	-7.64386	0	78023	chr16	84679789	84685147	+	NR_040537	lncRNA	.	RIKEN cDNA 4930529L06 gene
4930532I03Rik	0	0	-7.64386	-7.64386	0	75833	chr10	106555195	106602480	-	NR_131027	lncRNA	.	RIKEN cDNA 4930532I03 gene
4930532M18Rik	0	0	-7.64386	-7.64386	0	75233	chr1	154255689	154270416	+	NR_108050	lncRNA	.	RIKEN cDNA 4930532M18 gene
4930533B01Rik	0.0556143	0	-4.0442	-7.64386	-3.59966	75166	chr2	113691053	113708550	-	NR_040614	lncRNA	.	RIKEN cDNA 4930533B01 gene
4930533N22Rik	0.277134	0.371328	-1.82555	-1.40994	0.41561	75205	chr7	75030211	75075166	+	NR_131122	lncRNA	.	RIKEN cDNA 4930533N22 gene
4930533P14Rik	0	0	-7.64386	-7.64386	0	75159	chr1	96612057	96662573	-	NR_040478	lncRNA	.	RIKEN cDNA 4930533P14 gene
4930538K18Rik	0.0352557	0.0687183	-4.63466	-3.76183	0.87283	75180	chr4	119205055	119218217	-	NM_029198	protein_coding	RP23-344D2.8	RIKEN cDNA 4930538K18 gene
4930539C22Rik	0	0	-7.64386	-7.64386	0	75208	chr3	134404143	134423635	-	NR_040600	lncRNA	.	RIKEN cDNA 4930539C22 gene
4930539E08Rik	0	0.0202339	-7.64386	-5.30849	2.33536	207819	chr17	28896395	28915324	-	NM_172450	protein_coding	9130014G02	RIKEN cDNA 4930539E08 gene
4930539J05Rik	4.3625	7.13537	2.12681	2.836	0.709191	319587	chr3	135436221	135438665	-	NR_030689	lncRNA	8030475D13Rik	RIKEN cDNA 4930539J05 gene
4930539M17Rik	0	0	-7.64386	-7.64386	0	75149	chr3	9061964	9071076	+	NR_040597	lncRNA	.	RIKEN cDNA 4930539M17 gene
4930539N22Rik	0	0	-7.64386	-7.64386	0	75203	chr3	13597139	13652865	-	NR_040598	lncRNA	.	RIKEN cDNA 4930539N22 gene
4930540M03Rik	0	0	-7.64386	-7.64386	0	78025	chr9	15619857	15641220	+	NR_040746	lncRNA	.	RIKEN cDNA 4930540M03 gene
4930542C21Rik	0	0	-7.64386	-7.64386	0	75175	chr16	38017323	38054526	+	NR_040565	lncRNA	.	RIKEN cDNA 4930542C21 gene
4930542D17Rik	0	0	-7.64386	-7.64386	0	75211	chr16	50590503	50654166	+	NR_040566	lncRNA	.	RIKEN cDNA 4930542D17 gene
4930543E12Rik	0.0374795	0	-4.55709	-7.64386	-3.08677	75239	chr7	113100236	113142015	-	NR_045978	lncRNA	4930545H14Rik	RIKEN cDNA 4930543E12 gene
4930543N07Rik	0	0	-7.64386	-7.64386	0	75187	chr7	138554242	138566994	+	NR_131022	lncRNA	.	RIKEN cDNA 4930543N07 gene
4930544D05Rik	0	0	-7.64386	-7.64386	0	668433	chr11	70615894	70616890	+	NM_001145537	protein_coding	.	RIKEN cDNA 4930544D05 gene
4930544G11Rik	0	0	-7.64386	-7.64386	0	67653	chr6	65952571	65954014	+	NM_001161773	protein_coding	.	RIKEN cDNA 4930544G11 gene
4930544M13Rik	0	0.0369988	-7.64386	-4.57351	3.07035	75161	chr13	114607228	114697822	+	NR_045976	lncRNA	.	RIKEN cDNA 4930544M13 gene
4930545E07Rik	0	0	-7.64386	-7.64386	0	75162	chr18	17568746	17580990	-	NR_045374	lncRNA	.	RIKEN cDNA 4930545E07 gene
4930545H06Rik	0	0	-7.64386	-7.64386	0	75148	chr10	68319065	68321142	-	NR_045357	lncRNA	.	RIKEN cDNA 4930545H06 gene
4930545L23Rik	0.0199294	0	-5.32601	-7.64386	-2.31785	78805	chr2	135169573	135215616	-	NR_040517	lncRNA	.	RIKEN cDNA 4930545L23 gene
4930546C10Rik	0	0	-7.64386	-7.64386	0	78931	chr18	68889487	68951528	-	NR_038051	lncRNA	.	RIKEN cDNA 4930546C10 gene
4930546K05Rik	0.0274565	0	-4.94535	-7.64386	-2.69851	78194	chr9	42182238	42209231	-	NR_040754	lncRNA	.	RIKEN cDNA 4930546K05 gene
4930547E08Rik	0	0	-7.64386	-7.64386	0	78031	chr2	103804452	103810622	-	NR_040514	lncRNA	.	RIKEN cDNA 4930547E08 gene
4930547E14Rik	0	0	-7.64386	-7.64386	0	75145	chr16	59636945	59672993	+	NR_040564	lncRNA	.	RIKEN cDNA 4930547E14 gene
4930548G14Rik	0	0	-7.64386	-7.64386	0	75281	chr15	46623305	46639858	+	NR_045811	lncRNA	.	RIKEN cDNA 4930548G14 gene
4930548H24Rik	0	0.146164	-7.64386	-2.72581	4.91804	67656	chr5	31485859	31488262	+	NM_026296	protein_coding	AI427865	RIKEN cDNA 4930548H24 gene
4930548J01Rik	0	0	-7.64386	-7.64386	0	78043	chr17	4119446	4122102	-	NR_045462	lncRNA	1700113K09Rik	RIKEN cDNA 4930548J01 gene
4930548K13Rik	0	0	-7.64386	-7.64386	0	75360	chr4	26635820	26705449	-	NR_040656	lncRNA	.	RIKEN cDNA 4930548K13 gene
4930549C01Rik	0	0	-7.64386	-7.64386	0	67663	chr4	136610437	136613213	+	NM_026300	protein_coding	.	RIKEN cDNA 4930549C01 gene
4930549C15Rik	0	0	-7.64386	-7.64386	0	75243	chr12	26346710	26371748	+	NR_130981	lncRNA	.	RIKEN cDNA 4930549C15 gene
4930549G23Rik	0.856353	0.363334	-0.215323	-1.44091	-1.22559	75286	chr18	67776033	67799943	-	NR_045376	lncRNA	.	RIKEN cDNA 4930549G23 gene
4930550C14Rik	0	0.303316	-7.64386	-1.69752	5.94634	75311	chr9	53405286	53432803	+	NM_029247	protein_coding	AU017961	RIKEN cDNA 4930550C14 gene
4930550C17Rik	0	0	-7.64386	-7.64386	0	75245	chr13	56222224	56243940	-	NR_131023	lncRNA	.	RIKEN cDNA 4930550C17 gene
4930550L24Rik	0	0	-7.64386	-7.64386	0	75352	chrX	58911461	58920304	+	NM_023774	protein_coding	mage-k1	RIKEN cDNA 4930550L24 gene
4930552N02Rik	0	0	-7.64386	-7.64386	0	75367	chr4	52814604	52828269	+	NR_040661	lncRNA	.	RIKEN cDNA 4930552N02 gene
4930552P12Rik	0	0.01942	-7.64386	-5.35579	2.28806	77594	chr19	55640589	55702204	-	NR_045318	lncRNA	.	RIKEN cDNA 4930552P12 gene
4930553C11Rik	0	0	-7.64386	-7.64386	0	75315	chr11	39307703	39390225	-	NR_126439	lncRNA	.	RIKEN cDNA 4930553C11 gene
4930553E22Rik	0	0	-7.64386	-7.64386	0	75247	chr16	84371143	84375505	+	NR_040567	lncRNA	.	RIKEN cDNA 4930553E22 gene
4930554C24Rik	0	0	-7.64386	-7.64386	0	75253	chr9	84774398	84784351	+	NR_040739	lncRNA	.	RIKEN cDNA 4930554C24 gene
4930554G24Rik	0	0	-7.64386	-7.64386	0	75280	chr11	14072103	14179041	-	NR_131011	lncRNA	.	RIKEN cDNA 4930554G24 gene
4930554H23Rik	0	0	-7.64386	-7.64386	0	77631	chr7	63344692	63444529	-	NR_131089	lncRNA	.	RIKEN cDNA 4930554H23 gene
4930554I06Rik	0	0.118217	-7.64386	-3.02073	4.62313	75354	chr19	21104710	21105538	+	NR_126458	lncRNA	.	RIKEN cDNA 4930554I06 gene
4930555B11Rik	0	0	-7.64386	-7.64386	0	75279	chr2	57181831	57188257	+	NR_040633	lncRNA	.	RIKEN cDNA 4930555B11 gene
4930555B12Rik	0	0	-7.64386	-7.64386	0	78086	chrX	114926989	114928597	+	NR_130989	lncRNA	.	RIKEN cDNA 4930555B12 gene
4930555G01Rik	0	0	-7.64386	-7.64386	0	108978	chr14	5050629	5059243	+	NM_175393	protein_coding	.	RIKEN cDNA 4930555G01 gene
4930555G21Rik	0	0	-7.64386	-7.64386	0	75252	chr13	53648585	53650081	+	NR_131010	lncRNA	.	RIKEN cDNA 4930555G21 gene
4930555K05Rik	0	0	-7.64386	-7.64386	0	75361	chr13	73206091	73229100	-	NR_126459	lncRNA	.	RIKEN cDNA 4930555K05 gene
4930556C24Rik	0	0	-7.64386	-7.64386	0	75310	chr16	85819211	85826772	+	NR_040506	lncRNA	.	RIKEN cDNA 4930556C24 gene
4930556G01Rik	0	0	-7.64386	-7.64386	0	75332	chr4	30664596	30855744	+	NR_040655	lncRNA	.	RIKEN cDNA 4930556G01 gene
4930556J02Rik	0	0	-7.64386	-7.64386	0	75349	chr14	61492688	61500382	+	NR_045714	lncRNA	.	RIKEN cDNA 4930556J02 gene
4930556M19Rik	2.2291	3.94353	1.15969	1.98132	0.821622	75259	chr15	10714836	10790123	+	NR_045063	lncRNA	1700009D01Rik| C130022M03Rik	RIKEN cDNA 4930556M19 gene
4930556N09Rik	0	0	-7.64386	-7.64386	0	75301	chr10	97035768	97061059	+	NR_045358	lncRNA	.	RIKEN cDNA 4930556N09 gene
4930556N13Rik	0	0.0540639	-7.64386	-4.08158	3.56228	75285	chr11	88851604	88881395	+	NR_126433	lncRNA	.	RIKEN cDNA 4930556N13 gene
4930557A04Rik	0.132942	0	-2.85787	-7.64386	-4.78599	385317	chrX	9849703	9850252	+	NM_029229	protein_coding	.	RIKEN cDNA 4930557A04 gene
4930557F10Rik	0	0.108127	-7.64386	-3.14398	4.49987	75322	chr13	23276204	23313407	-	NR_126444	lncRNA	.	RIKEN cDNA 4930557F10 gene
4930557J02Rik	0	0	-7.64386	-7.64386	0	75357	chr5	34118740	34135339	+	NR_040703	lncRNA	.	RIKEN cDNA 4930557J02 gene
4930557K07Rik	0	0.573272	-7.64386	-0.79018	6.85368	78202	chr6	125010176	125049853	-	NR_130997	lncRNA	.	RIKEN cDNA 4930557K07 gene
4930558C23Rik	0	0	-7.64386	-7.64386	0	67654	chr3	95386458	95402841	-	NR_015490	lncRNA	.	RIKEN cDNA 4930558C23 gene
4930558F17Rik	0	0	-7.64386	-7.64386	0	75330	chr5	11109800	11680823	-	NR_126451	lncRNA	.	RIKEN cDNA 4930558F17 gene
4930558G05Rik	0	0	-7.64386	-7.64386	0	75274	chrX	129051524	129067146	+	NR_045441	lncRNA	.	RIKEN cDNA 4930558G05 gene
4930558J18Rik	0.8428	0.482248	-0.238204	-1.03727	-0.799068	75323	chr1	57359222	57377544	-	NR_037999	lncRNA	.	RIKEN cDNA 4930558J18 gene
4930558K02Rik	0	0	-7.64386	-7.64386	0	75368	chr1	161942089	161979636	-	NM_001204904	protein_coding	.	RIKEN cDNA 4930558K02 gene
4930559C10Rik	0	0	-7.64386	-7.64386	0	75295	chr12	93416457	93444823	-	NR_126436	lncRNA	.	RIKEN cDNA 4930559C10 gene
4930562C15Rik	0.0252586	0	-5.04651	-7.64386	-2.59735	78809	chr16	4835416	4867691	+	NM_030192	protein_coding	.	RIKEN cDNA 4930562C15 gene
4930562F07Rik	1.40968	1.54877	0.500476	0.635773	0.135297	75255	chr1	160074735	160077985	-	NR_038030	lncRNA	.	RIKEN cDNA 4930562F07 gene
4930563D23Rik	0	0	-7.64386	-7.64386	0	75328	chr16	92318763	92321441	-	NM_029252	protein_coding	.	RIKEN cDNA 4930563D23 gene
4930563E18Rik	0	0	-7.64386	-7.64386	0	75370	chr18	10706860	10711832	+	NR_045379	lncRNA	.	RIKEN cDNA 4930563E18 gene
4930563E22Rik	0.23563	0.27169	-2.05511	-1.85366	0.201454	75304	chr11	72215138	72218450	+	NM_001163728	protein_coding	.	RIKEN cDNA 4930563E22 gene
4930563F08Rik	0	0	-7.64386	-7.64386	0	75369	chr5	131880269	131883768	+	NR_040704	lncRNA	.	RIKEN cDNA 4930563F08 gene
4930563H07Rik	0	0	-7.64386	-7.64386	0	75347	chr6	48986616	48999616	-	NR_126454	lncRNA	.	RIKEN cDNA 4930563H07 gene
4930563M20Rik	0	0	-7.64386	-7.64386	0	78213	chr8	116781712	116801412	-	NR_046193	lncRNA	.	RIKEN cDNA 4930563M20 gene
4930563M21Rik	0	0	-7.64386	-7.64386	0	75258	chr9	55962589	55980932	-	NM_183111	protein_coding	Rfpl3s	RIKEN cDNA 4930563M21 gene
4930564B18Rik	0	0	-7.64386	-7.64386	0	.	chr14	75642259	75667137	+	NM_029230	.	.	.
4930564C03Rik	0	0	-7.64386	-7.64386	0	75341	chr17	44879704	44880885	-	NM_029257	protein_coding	.	RIKEN cDNA 4930564C03 gene
4930564D02Rik	0	0	-7.64386	-7.64386	0	75269	chr3	105066844	105078806	+	NM_029228	protein_coding	.	RIKEN cDNA 4930564D02 gene
4930565D16Rik	0	0	-7.64386	-7.64386	0	75309	chr3	84349376	84379921	-	NR_040752	lncRNA	.	RIKEN cDNA 4930565D16 gene
4930565N06Rik	0.393395	0.462891	-1.32773	-1.09576	0.231973	68306	chr16	36880519	36897189	-	NR_040476	lncRNA	4930428L02Rik	RIKEN cDNA 4930565N06 gene
4930567H12Rik	0	0	-7.64386	-7.64386	0	75930	chr8	125584638	125616670	+	NR_015535	lncRNA	4930579P07Rik	RIKEN cDNA 4930567H12 gene
4930567H17Rik	0	0	-7.64386	-7.64386	0	619303	chrX	70393901	70394740	-	NM_001033807	protein_coding	.	RIKEN cDNA 4930567H17 gene
4930567J20Rik	0	0	-7.64386	-7.64386	0	78221	chr16	71249904	71267176	+	NR_040576	lncRNA	.	RIKEN cDNA 4930567J20 gene
4930567K12Rik	0	0	-7.64386	-7.64386	0	75845	chr7	92092206	92119511	-	NR_131016	lncRNA	.	RIKEN cDNA 4930567K12 gene
4930567K20Rik	0	0	-7.64386	-7.64386	0	78056	chr10	10751046	10758131	+	NR_046010	lncRNA	1700038H22Rik	RIKEN cDNA 4930567K20 gene
4930568D16Rik	0	0	-7.64386	-7.64386	0	75859	chr2	35354218	35367729	-	NM_029463	protein_coding	Ggta1l1	RIKEN cDNA 4930568D16 gene
4930568E12Rik	0	0	-7.64386	-7.64386	0	78219	chr9	13091267	13105855	-	NR_040755	lncRNA	.	RIKEN cDNA 4930568E12 gene
4930568G15Rik	0	0	-7.64386	-7.64386	0	75857	chr1	165066617	165091930	-	NR_040480	lncRNA	.	RIKEN cDNA 4930568G15 gene
4930570G19Rik	0	0.0152284	-7.64386	-5.62747	2.01638	329782	chr3	156546753	156561687	-	NR_040399	lncRNA	C630015G22	RIKEN cDNA 4930570G19 gene
4930571K23Rik	0	0	-7.64386	-7.64386	0	75861	chr7	125368861	125371013	+	NM_001145759	protein_coding	AI428146	RIKEN cDNA 4930571K23 gene
4930571O06Rik	0	0	-7.64386	-7.64386	0	78048	chr8	113517282	113550808	+	NR_110476	lncRNA	.	RIKEN cDNA 4930571O06 gene
4930572K03Rik	0	0	-7.64386	-7.64386	0	75916	chr5	127170565	127184356	+	NR_045371	lncRNA	.	RIKEN cDNA 4930572K03 gene
4930572O03Rik	0	0.0465151	-7.64386	-4.27886	3.365	381715	chr5	15652288	15657059	-	NR_073011	misc_RNA	.	RIKEN cDNA 4930572O03 gene
4930572O13Rik	0	0	-7.64386	-7.64386	0	75862	chr14	25139795	25143241	-	NR_045718	lncRNA	.	RIKEN cDNA 4930572O13 gene
4930573O16Rik	0	0	-7.64386	-7.64386	0	78049	chr2	52291002	52315240	+	NR_040620	lncRNA	.	RIKEN cDNA 4930573O16 gene
4930577N17Rik	0.889178	0.587658	-0.161366	-0.754728	-0.593362	67746	chr3	51276761	51278407	+	NR_073429	lncRNA	.	RIKEN cDNA 4930577N17 gene
4930578C19Rik	0	0	-7.64386	-7.64386	0	75905	chrX	18418427	18461274	-	NM_175228	protein_coding	.	RIKEN cDNA 4930578C19 gene
4930578E11Rik	0.0236602	0	-5.12481	-7.64386	-2.51905	78058	chr18	29396716	29496416	-	NR_045391	lncRNA	.	RIKEN cDNA 4930578E11 gene
4930578I06Rik	0	0	-7.64386	-7.64386	0	67750	chr14	63971122	63987780	-	NM_026359	protein_coding	AI429111	RIKEN cDNA 4930578I06 gene
4930578M01Rik	0.065292	0	-3.8305	-7.64386	-3.81336	75951	chr15	98985965	98989281	+	NR_045991	lncRNA	3010001K12Rik	RIKEN cDNA 4930578M01 gene
4930578N18Rik	0	0	-7.64386	-7.64386	0	78215	chr16	76122613	76156086	+	NR_040575	lncRNA	.	RIKEN cDNA 4930578N18 gene
4930579F01Rik	0	0	-7.64386	-7.64386	0	67741	chr3	138164135	138186713	-	NM_001163385	protein_coding	.	RIKEN cDNA 4930579F01 gene
4930579G18Rik	0.875133	0.355444	-0.184207	-1.47215	-1.28795	75913	chr14	54650511	54655100	+	NR_038053	lncRNA	.	RIKEN cDNA 4930579G18 gene
4930579G24Rik	8.33169	6.84358	3.05947	2.7758	-0.28367	75939	chr3	79629079	79632819	+	NM_029482	protein_coding	.	RIKEN cDNA 4930579G24 gene
4930579H20Rik	0	0	-7.64386	-7.64386	0	75855	chr10	27389866	27397225	+	NR_131034	lncRNA	.	RIKEN cDNA 4930579H20 gene
4930579J19Rik	0	0	-7.64386	-7.64386	0	75854	chr13	38460241	38461793	-	NR_131033	lncRNA	.	RIKEN cDNA 4930579J19 gene
4930579K19Rik	0.193511	0.330815	-2.33271	-1.57426	0.758448	75881	chr9	98562460	98563611	-	NR_029444	lncRNA	.	RIKEN cDNA 4930579K19 gene
4930579P08Rik	0	0	-7.64386	-7.64386	0	75878	chr10	116729253	116739760	+	NR_131036	lncRNA	.	RIKEN cDNA 4930579P08 gene
4930581F22Rik	0.854317	0.688653	-0.218738	-0.527714	-0.308976	78934	chr9	35116728	35130922	+	NR_029475	lncRNA	.	RIKEN cDNA 4930581F22 gene
4930583K01Rik	0	0	-7.64386	-7.64386	0	67745	chr7	118243907	118245551	+	NR_027879	lncRNA	.	RIKEN cDNA 4930583K01 gene
4930583P06Rik	0	0	-7.64386	-7.64386	0	75946	chr2	124217679	124222358	-	NR_040612	lncRNA	.	RIKEN cDNA 4930583P06 gene
4930584F24Rik	0	0	-7.64386	-7.64386	0	75942	chr5	26460070	26493314	-	NR_029445	lncRNA	1700001J09Rik| 4930522C06Rik	RIKEN cDNA 4930584F24 gene
4930586N03Rik	0	0	-7.64386	-7.64386	0	75887	chr13	23313525	23385799	+	NR_131052	lncRNA	.	RIKEN cDNA 4930586N03 gene
4930587E11Rik	0	0	-7.64386	-7.64386	0	75893	chr6	102266100	102336676	+	NR_131018	lncRNA	4930523E13Rik	RIKEN cDNA 4930587E11 gene
4930590J08Rik	0	0	-7.64386	-7.64386	0	381798	chr6	91904233	91950725	+	NM_198668	protein_coding	Gm1071	RIKEN cDNA 4930590J08 gene
4930590L20Rik	0	0	-7.64386	-7.64386	0	75910	chr1	140570176	140656402	-	NR_040604	lncRNA	.	RIKEN cDNA 4930590L20 gene
4930591A17Rik	0	0	-7.64386	-7.64386	0	68175	chr2	179414936	179416880	+	NM_026596	protein_coding	.	RIKEN cDNA 4930591A17 gene
4930591E09Rik	0	0	-7.64386	-7.64386	0	75877	chr10	38175774	38181903	+	NR_131035	lncRNA	.	RIKEN cDNA 4930591E09 gene
4930592A05Rik	0.171629	0	-2.50121	-7.64386	-5.14265	75880	chr15	33593881	33653436	-	NR_045070	lncRNA	.	RIKEN cDNA 4930592A05 gene
4930592I03Rik	0.234407	0.172059	-2.06246	-2.4977	-0.435235	75853	chr18	82918405	82920560	-	NR_033307	lncRNA	.	RIKEN cDNA 4930592I03 gene
4930593A02Rik	0	0	-7.64386	-7.64386	0	71301	chr3	58692589	58788524	+	NR_045167	lncRNA	4933440I01Rik	RIKEN cDNA 4930593A02 gene
4930593C16Rik	0	0	-7.64386	-7.64386	0	78060	chr9	120924455	120930802	-	NR_040753	lncRNA	.	RIKEN cDNA 4930593C16 gene
4930594C11Rik	0.0359022	0.0523206	-4.61168	-4.1248	0.486875	77633	chr1	37485851	37488605	-	NR_024017	misc_RNA	.	RIKEN cDNA 4930594C11 gene
4930594O21Rik	0	0	-7.64386	-7.64386	0	75947	chr3	37609891	37615276	+	NR_130162	lncRNA	.	RIKEN cDNA 4930594O21 gene
4930595D18Rik	0	0	-7.64386	-7.64386	0	78062	chr12	111159850	111184491	-	NR_130987	lncRNA	.	RIKEN cDNA 4930595D18 gene
4930595M18Rik	0	0	-7.64386	-7.64386	0	245492	chrX	81419575	81458122	-	NM_173435	protein_coding	RP23-217L21.2	RIKEN cDNA 4930595M18 gene
4930596D02Rik	0	0	-7.64386	-7.64386	0	239036	chr14	35809486	35811978	-	NM_001033766	protein_coding	.	RIKEN cDNA 4930596D02 gene
4930596I21Rik	0	0	-7.64386	-7.64386	0	78229	chr1	138977657	138979246	+	NR_108103	lncRNA	.	RIKEN cDNA 4930596I21 gene
4930597A21Rik	0	0	-7.64386	-7.64386	0	75389	chr11	44586317	44591229	+	NR_126460	lncRNA	.	RIKEN cDNA 4930597A21 gene
4930597G03Rik	0	0	-7.64386	-7.64386	0	75377	chr14	51317335	51345489	-	NR_045736	lncRNA	.	RIKEN cDNA 4930597G03 gene
4930598F16Rik	0	0	-7.64386	-7.64386	0	75381	chr1	95701184	95716518	-	NR_040479	lncRNA	.	RIKEN cDNA 4930598F16 gene
4930599N23Rik	0	0	-7.64386	-7.64386	0	75379	chr6	39118473	39148312	+	NR_045813	lncRNA	.	RIKEN cDNA 4930599N23 gene
4931402G19Rik	0.0222994	0	-5.19499	-7.64386	-2.44887	70933	chr2	120455698	120469367	-	NR_040608	lncRNA	.	RIKEN cDNA 4931402G19 gene
4931403E22Rik	0	0	-7.64386	-7.64386	0	70942	chr19	26768801	26823907	-	NR_045306	lncRNA	.	RIKEN cDNA 4931403E22 gene
4931403G20Rik	0.0305248	0.0297161	-4.81503	-4.84825	-0.0332216	70934	chr12	69843686	69853671	+	NR_038173	lncRNA	.	RIKEN cDNA 4931403G20 gene
4931406B18Rik	0.0121562	0	-5.86513	-7.64386	-1.77873	74054	chr7	43492044	43505938	-	NM_028737	protein_coding	4930538L19Rik	RIKEN cDNA 4931406B18 gene
4931406C07Rik	7.90496	6.59372	2.98367	2.72219	-0.261484	70984	chr9	15283337	15306167	-	NM_001199484	protein_coding	.	RIKEN cDNA 4931406C07 gene
4931406H21Rik	0.275638	0.170248	-1.83322	-2.51253	-0.679312	77592	chr14	25586804	25590661	+	NR_033492	lncRNA	.	RIKEN cDNA 4931406H21 gene
4931406P16Rik	9.21302	9.39454	3.20446	3.23259	0.0281333	233103	chr7	34236714	34285609	-	NM_172741	protein_coding	AA553327| mKIAA0355	RIKEN cDNA 4931406P16 gene
4931408C20Rik	0	0	-7.64386	-7.64386	0	210940	chr1	26681801	26687460	-	NM_001033764	protein_coding	.	RIKEN cDNA 4931408C20 gene
4931408D14Rik	0.577373	0.202492	-0.779985	-2.26887	-1.48889	77059	chr19	37258426	37264095	-	NR_040299	lncRNA	.	RIKEN cDNA 4931408D14 gene
4931409K22Rik	0	0	-7.64386	-7.64386	0	231045	chr5	24543434	24555469	-	NR_033188	protein_coding	Iqca1l| Iqca1p1	RIKEN cDNA 4931409K22 gene
4931414P19Rik	3.80833	2.91578	1.93105	1.54635	-0.384698	74359	chr14	54583663	54605908	-	NM_028890	protein_coding	.	RIKEN cDNA 4931414P19 gene
4931417E11Rik	0	0	-7.64386	-7.64386	0	66740	chr6	73468573	73469667	-	NM_025737	protein_coding	.	RIKEN cDNA 4931417E11 gene
4931419H13Rik	0	0	-7.64386	-7.64386	0	70970	chr3	55055242	55084002	+	NR_040593	lncRNA	.	RIKEN cDNA 4931419H13 gene
4931420L22Rik	0	0	-7.64386	-7.64386	0	70972	chr16	71131076	71139029	+	NR_040561	lncRNA	.	RIKEN cDNA 4931420L22 gene
4931423N10Rik	0	0	-7.64386	-7.64386	0	70981	chr2	23207476	23267129	+	NM_027635	protein_coding	RP23-54E16.2	RIKEN cDNA 4931423N10 gene
4931428F04Rik	4.05364	4.35514	2.021	2.12437	0.103378	74356	chr8	105280409	105289528	-	NM_028888	protein_coding	AI426165| Kiaa0895l	RIKEN cDNA 4931428F04 gene
4931428L18Rik	0	0	-7.64386	-7.64386	0	70988	chr1	31141078	31222656	-	NR_033445	lncRNA	4930563O14Rik	RIKEN cDNA 4931428L18 gene
4931429I11Rik	0	0	-7.64386	-7.64386	0	.	chr9	40894849	40964112	-	NM_001081121	.	.	.
4931429L15Rik	0	0.0243109	-7.64386	-5.09242	2.55144	74361	chr9	46303361	46319986	-	NM_183104	protein_coding	.	RIKEN cDNA 4931429L15 gene
4931429P17Rik	0	0	-7.64386	-7.64386	0	70971	chr13	47960330	48018608	-	NR_038004	lncRNA	.	RIKEN cDNA 4931429P17 gene
4931430N09Rik	0	0	-7.64386	-7.64386	0	74363	chr6	118880158	118885543	+	NR_046053	lncRNA	.	RIKEN cDNA 4931430N09 gene
4931431B13Rik	0	0	-7.64386	-7.64386	0	70973	chr7	128192050	128203328	-	NR_045183	lncRNA	1700108I23Rik| AA536668	RIKEN cDNA 4931431B13 gene
4931431C16Rik	0	0.0703144	-7.64386	-3.73093	3.91293	74364	chr5	35581227	35588763	-	NR_045807	lncRNA	.	RIKEN cDNA 4931431C16 gene
4931431F19Rik	0	0	-7.64386	-7.64386	0	70980	chr7	104127913	104129823	-	NM_027634	protein_coding	.	RIKEN cDNA 4931431F19 gene
4931440F15Rik	0.0149143	0	-5.65005	-7.64386	-1.9938	216622	chr11	29822395	29825668	-	NM_176829	protein_coding	Fem1ab	RIKEN cDNA 4931440F15 gene
4931440J10Rik	0	0	-7.64386	-7.64386	0	71000	chr14	62760501	62830126	+	NR_045503	lncRNA	.	RIKEN cDNA 4931440J10 gene
4931440P22Rik	0.249146	0.350249	-1.97627	-1.4931	0.483173	71004	chr3	65527485	65529414	-	NR_027955	lncRNA	.	RIKEN cDNA 4931440P22 gene
4932411E22Rik	0	0	-7.64386	-7.64386	0	.	chr11	89390223	89418948	-	NM_172534	.	.	.
4932411N23Rik	0	0	-7.64386	-7.64386	0	237029	chrX	126812462	126834004	-	NM_177705	protein_coding	.	RIKEN cDNA 4932411N23 gene
4932412D23Rik	0	0	-7.64386	-7.64386	0	75722	chr16	42725702	42875762	-	NR_040521	lncRNA	ENSMUSG00000075070| Gm10809	RIKEN cDNA 4932412D23 gene
4932413F04Rik	0	0	-7.64386	-7.64386	0	319215	chr9	103557090	103565891	+	NR_040764	lncRNA	.	RIKEN cDNA 4932413F04 gene
4932414J04Rik	0	0	-7.64386	-7.64386	0	237694	chr11	21494730	21511180	-	NR_028259	lncRNA	.	RIKEN cDNA 4932414J04 gene
4932414N04Rik	0	0	-7.64386	-7.64386	0	75721	chr2	68657884	68748465	+	NM_183113	protein_coding	RP23-459M13.1	RIKEN cDNA 4932414N04 gene
4932415M13Rik	0	0	-7.64386	-7.64386	0	211496	chr17	53716509	53733843	+	NR_073205	lncRNA	.	RIKEN cDNA 4932415M13 gene
4932416H05Rik	0.555108	0.585317	-0.836223	-0.760438	0.0757849	654409	chr2	129798369	129801459	-	NR_029452	lncRNA	.	RIKEN cDNA 4932416H05 gene
4932416K20Rik	0	0	-7.64386	-7.64386	0	442809	chr8	104795237	104798792	+	NM_001002775	lncRNA	.	.
4932418E24Rik	0	0	-7.64386	-7.64386	0	.	chr2	26271647	26294557	-	NM_177841	.	.	.
4932429P05Rik	0	0	-7.64386	-7.64386	0	245509	chrX	89752268	89755491	+	NM_001085511	protein_coding	RP23-256C8.1	RIKEN cDNA 4932429P05 gene
4932435O22Rik	0	0	-7.64386	-7.64386	0	319819	chr11	114413405	114448860	-	NR_027643	lncRNA	.	RIKEN cDNA 4932435O22 gene
4932438A13Rik	5.04609	4.08618	2.33659	2.03252	-0.304078	229227	chr3	36863106	37053033	+	NM_172679	protein_coding	4732443H21| B830039D19Rik| D630029K19Rik| FSA| Kiaa1109| Tweek	RIKEN cDNA 4932438A13 gene
4932438H23Rik	0	0	-7.64386	-7.64386	0	74387	chr16	91053935	91069145	-	NM_001163695	protein_coding	4931406G06Rik| AI550392	RIKEN cDNA 4932438H23 gene
4932441J04Rik	0	0.0866146	-7.64386	-3.44828	4.19558	319216	chr5	57570084	57717919	-	NR_015588	lncRNA	.	RIKEN cDNA 4932441J04 gene
4932443I19Rik	0	0	-7.64386	-7.64386	0	403185	chr8	13705889	13743066	+	NM_001101519	protein_coding	A230061C02Rik| Gm1106	RIKEN cDNA 4932443I19 gene
4932702P03Rik	0	0	-7.64386	-7.64386	0	73326	chr13	24905600	24911780	+	NR_045182	lncRNA	1700047I16Rik	RIKEN cDNA 4932702P03 gene
4933400A11Rik	0	0.0436295	-7.64386	-4.36202	3.28183	66747	chrX	169776378	169779635	-	NR_003635	misc_RNA	.	RIKEN cDNA 4933400A11 gene
4933400B14Rik	0	0	-7.64386	-7.64386	0	71052	chr17	89320227	89327333	+	NR_045432	lncRNA	.	RIKEN cDNA 4933400B14 gene
4933400C23Rik	0	0	-7.64386	-7.64386	0	331003	chr9	92718716	92795711	+	NR_040770	lncRNA	4933400C23	RIKEN cDNA 4933400C23 gene
4933400F21Rik	0.215007	0.0521796	-2.18438	-4.12836	-1.94398	74403	chr1	89676507	89683892	-	NR_015540	lncRNA	1700091C04Rik| 4930565K10Rik	RIKEN cDNA 4933400F21 gene
4933400L20Rik	0	0	-7.64386	-7.64386	0	71058	chr8	103603799	103680382	+	NR_045730	lncRNA	.	RIKEN cDNA 4933400L20 gene
4933401B06Rik	0	0	-7.64386	-7.64386	0	71011	chrX	107542582	107543800	+	NR_033580	misc_RNA	.	RIKEN cDNA 4933401B06 gene
4933401D09Rik	0	0	-7.64386	-7.64386	0	71008	chr17	15631788	15641102	+	NR_045431	lncRNA	.	RIKEN cDNA 4933401D09 gene
4933401H06Rik	0	0	-7.64386	-7.64386	0	71038	chr3	135833694	135840269	-	NR_040540	lncRNA	.	RIKEN cDNA 4933401H06 gene
4933402C06Rik	0	0	-7.64386	-7.64386	0	71029	chr7	40674737	40691260	+	NR_045504	lncRNA	.	RIKEN cDNA 4933402C06 gene
4933402D24Rik	0.265705	0.143712	-1.88521	-2.74941	-0.8642	74426	chr1	63754909	63769267	-	NM_001256158	protein_coding	.	RIKEN cDNA 4933402D24 gene
4933402E13Rik	0	0	-7.64386	-7.64386	0	74437	chrX	62283499	62292078	+	NM_001199997	protein_coding	RP23-146M22.1	RIKEN cDNA 4933402E13 gene
4933402J07Rik	0	0	-7.64386	-7.64386	0	330820	chr8	87563907	87589197	+	NM_177901	protein_coding	.	RIKEN cDNA 4933402J07 gene
4933402J10Rik	0	0	-7.64386	-7.64386	0	71057	chr5	59963119	59986002	-	NR_040682	lncRNA	.	RIKEN cDNA 4933402J10 gene
4933402J15Rik	0	0	-7.64386	-7.64386	0	74425	chr14	74355527	74369741	+	NR_046059	lncRNA	.	RIKEN cDNA 4933402J15 gene
4933402N03Rik	0	0	-7.64386	-7.64386	0	233918	chr7	131138347	131146283	-	NM_173409	protein_coding	4930412O05	RIKEN cDNA 4933402N03 gene
4933402N22Rik	0	0	-7.64386	-7.64386	0	545732	chr5	11918043	11922804	+	NM_001177510	protein_coding	.	RIKEN cDNA 4933402N22 gene
4933402P03Rik	0	0	-7.64386	-7.64386	0	108803	chr11	69816566	69818440	-	NM_175368	protein_coding	.	RIKEN cDNA 4933402P03 gene
4933403O08Rik	0	0	-7.64386	-7.64386	0	71030	chrX	112239049	112243852	+	NM_001177389	protein_coding	RP23-466J17.1	RIKEN cDNA 4933403O08 gene
4933404G15Rik	0	0	-7.64386	-7.64386	0	74066	chr16	16707687	16718121	-	NR_045920	lncRNA	4933401J20Rik	RIKEN cDNA 4933404G15 gene
4933404K08Rik	0	0	-7.64386	-7.64386	0	74061	chr13	23278350	23282267	+	NR_046038	lncRNA	.	RIKEN cDNA 4933404K08 gene
4933404K13Rik	0	0	-7.64386	-7.64386	0	71018	chr10	43825907	43833301	+	NR_131055	lncRNA	.	RIKEN cDNA 4933404K13 gene
4933404O12Rik	2.74729	1.63991	1.46063	0.718009	-0.742624	66752	chr5	136919146	136937109	+	NR_015555	lncRNA	AW494809	RIKEN cDNA 4933404O12 gene
4933405D12Rik	0	0	-7.64386	-7.64386	0	74057	chr3	122882592	122924116	-	NR_046036	lncRNA	.	RIKEN cDNA 4933405D12 gene
4933405E24Rik	0.104609	0	-3.18956	-7.64386	-4.45429	71056	chr11	54177772	54213288	-	NR_045506	lncRNA	.	RIKEN cDNA 4933405E24 gene
4933405L10Rik	0.249268	0.0487142	-1.97558	-4.21855	-2.24297	71046	chr8	105708303	105710168	+	NM_027655	protein_coding	.	RIKEN cDNA 4933405L10 gene
4933405O20Rik	0	0	-7.64386	-7.64386	0	243996	chr7	50599190	50600528	+	NM_172901	protein_coding	.	RIKEN cDNA 4933405O20 gene
4933406C10Rik	0.0962039	0.0312346	-3.30466	-4.78649	-1.48183	74076	chr12	32919384	32953789	-	NR_044986	lncRNA	.	RIKEN cDNA 4933406C10 gene
4933406D12Rik	0.0862051	0	-3.45474	-7.64386	-4.18911	74065	chr2	146542931	146546108	+	NR_040502	lncRNA	.	RIKEN cDNA 4933406D12 gene
4933406F09Rik	0	0.041081	-7.64386	-4.43968	3.20417	68308	chr14	7412473	7422685	+	NR_015568	lncRNA	1700007H14Rik| 4930429F21Rik| 4930570O04Rik| Gm3768	RIKEN cDNA 4933406F09 gene
4933406G16Rik	0	0	-7.64386	-7.64386	0	74059	chr11	19065275	19075740	+	NR_046037	lncRNA	.	RIKEN cDNA 4933406G16 gene
4933406I18Rik	0	0	-7.64386	-7.64386	0	71045	chr7	114315479	114415161	-	NR_029437	lncRNA	4933403D24Rik	RIKEN cDNA 4933406I18 gene
4933406J08Rik	0	0	-7.64386	-7.64386	0	.	chr2	122186272	122206393	+	NM_028914	.	.	.
4933406J10Rik	0	0.0575019	-7.64386	-3.99996	3.6439	77800	chr7	82743346	82755644	-	NR_046004	lncRNA	A930009F24Rik	RIKEN cDNA 4933406J10 gene
4933406K04Rik	0	0	-7.64386	-7.64386	0	71033	chr12	106685607	106716324	-	NR_015512	lncRNA	4930426M03Rik| 4930485I22Rik| 4933427G14Rik	RIKEN cDNA 4933406K04 gene
4933406M09Rik	0	0	-7.64386	-7.64386	0	240755	chr1	134385940	134390983	+	NM_173771	protein_coding	.	RIKEN cDNA 4933406M09 gene
4933407E24Rik	0	0	-7.64386	-7.64386	0	108809	chr4	124569179	124575538	+	NR_045819	lncRNA	.	RIKEN cDNA 4933407E24 gene
4933407G14Rik	0	0	-7.64386	-7.64386	0	71125	chr10	75449510	75463104	+	NR_045841	lncRNA	.	RIKEN cDNA 4933407G14 gene
4933407I05Rik	0	0	-7.64386	-7.64386	0	74072	chr9	51914429	51927003	+	NR_040731	lncRNA	.	RIKEN cDNA 4933407I05 gene
4933407K13Rik	2.45381	1.65372	1.29796	0.73007	-0.56789	74396	chrX	75725458	75764699	-	NR_029443	lncRNA	A130080L05Rik	RIKEN cDNA 4933407K13 gene
4933407L21Rik	0	0	-7.64386	-7.64386	0	71141	chr1	85928483	85931756	+	NR_037692	lncRNA	.	RIKEN cDNA 4933407L21 gene
4933408B17Rik	0.275907	0.185686	-1.83184	-2.39073	-0.558894	271508	chr18	34579846	34597468	-	NM_177773	protein_coding	.	RIKEN cDNA 4933408B17 gene
4933408J17Rik	0.913536	0.781324	-0.122592	-0.346804	-0.224212	74454	chr10	93589413	93605245	+	NR_045810	lncRNA	.	RIKEN cDNA 4933408J17 gene
4933408N05Rik	0	0	-7.64386	-7.64386	0	71122	chr8	114341161	114351478	-	NR_045831	lncRNA	.	RIKEN cDNA 4933408N05 gene
4933409G03Rik	0	0	-7.64386	-7.64386	0	227998	chr2	68582413	68616463	+	NM_177651	protein_coding	.	RIKEN cDNA 4933409G03 gene
4933409K07Rik	0.252734	0.286083	-1.95605	-1.7805	0.175548	108816	chr4	42031296	42462993	-	NR_033123	misc_RNA	AV071682| b1402	RIKEN cDNA 4933409K07 gene
4933411E08Rik	0	0	-7.64386	-7.64386	0	71067	chr10	117925459	117948307	+	NR_045342	lncRNA	.	RIKEN cDNA 4933411E08 gene
4933411G06Rik	0	0	-7.64386	-7.64386	0	71090	chr10	51756174	51757194	-	NR_045158	misc_RNA	.	RIKEN cDNA 4933411G06 gene
4933411K16Rik	0.191475	0.485443	-2.34758	-1.02784	1.31974	66765	chr19	42052228	42053628	+	NM_025752	protein_coding	.	RIKEN cDNA 4933411K16 gene
4933412E12Rik	2.30573	1.8137	1.20835	0.862908	-0.345441	71086	chr10	116950562	116963279	+	NR_038026	lncRNA	.	RIKEN cDNA 4933412E12 gene
4933412E24Rik	0	0	-7.64386	-7.64386	0	71088	chr15	60014866	60016618	-	NM_027668	protein_coding	.	RIKEN cDNA 4933412E24 gene
4933412O06Rik	0	0.0487678	-7.64386	-4.21711	3.42674	71071	chr13	15781664	15802630	-	NR_045507	lncRNA	.	RIKEN cDNA 4933412O06 gene
4933413G19Rik	0.10331	0.0504906	-3.20676	-4.17161	-0.964851	71149	chr6	128375510	128385144	+	NM_027697	protein_coding	.	RIKEN cDNA 4933413G19 gene
4933413J09Rik	0.10069	0.125694	-3.24209	-2.93574	0.306354	71106	chr14	26357547	26400456	+	NR_038005	lncRNA	GCSE	RIKEN cDNA 4933413J09 gene
4933413L06Rik	0	0	-7.64386	-7.64386	0	71100	chr13	117706764	117720011	-	NR_045508	lncRNA	.	RIKEN cDNA 4933413L06 gene
4933415F23Rik	0	0	-7.64386	-7.64386	0	66755	chr1	23100474	23102253	-	NM_025746	protein_coding	.	RIKEN cDNA 4933415F23 gene
4933416C03Rik	0.022343	0	-5.19268	-7.64386	-2.45117	619332	chr10	116111664	116113917	-	NM_001161855	protein_coding	.	RIKEN cDNA 4933416C03 gene
4933416E03Rik	0	0	-7.64386	-7.64386	0	71081	chr2	159947341	159981289	+	NR_040498	lncRNA	.	RIKEN cDNA 4933416E03 gene
4933416I08Rik	0	0	-7.64386	-7.64386	0	71159	chrX	53686491	53690084	+	NM_027700	protein_coding	.	RIKEN cDNA 4933416I08 gene
4933416M06Rik	0	0	-7.64386	-7.64386	0	71174	chr13	101254319	101293396	+	NR_045846	lncRNA	.	RIKEN cDNA 4933416M06 gene
4933416M07Rik	1.91545	2.23991	0.941444	1.16666	0.225213	71082	chr8	27142910	27149706	+	NR_045840	lncRNA	.	RIKEN cDNA 4933416M07 gene
4933417A18Rik	0	0	-7.64386	-7.64386	0	66761	chr13	34924409	34953196	+	NM_025750	protein_coding	.	RIKEN cDNA 4933417A18 gene
4933417D19Rik	0.0447354	0.0436725	-4.32958	-4.36075	-0.0311662	71186	chr8	123235091	123242359	+	NR_045849	lncRNA	.	RIKEN cDNA 4933417D19 gene
4933417E11Rik	0	0.0504331	-7.64386	-4.17311	3.47075	71134	chr1	71958998	72005195	-	NR_040454	lncRNA	.	RIKEN cDNA 4933417E11 gene
4933417G07Rik	0	0	-7.64386	-7.64386	0	71182	chr3	55847105	55848065	+	NR_033592	misc_RNA	.	RIKEN cDNA 4933417G07 gene
4933417O13Rik	0	0	-7.64386	-7.64386	0	71153	chr7	143322772	143330650	-	NR_045842	lncRNA	.	RIKEN cDNA 4933417O13 gene
4933421I07Rik	0	0	-7.64386	-7.64386	0	71162	chr7	42445462	42448080	-	NM_027702	protein_coding	.	RIKEN cDNA 4933421I07 gene
4933421O10Rik	0.200904	0.18281	-2.27996	-2.41265	-0.132698	100504166	chr4	33027139	33031323	-	NR_036602	lncRNA	.	RIKEN cDNA 4933421O10 gene
4933422A05Rik	0.0397939	0.0776276	-4.48055	-3.59723	0.883321	71133	chr9	35281105	35285423	+	NR_040715	lncRNA	.	RIKEN cDNA 4933422A05 gene
4933424G05Rik	0.0297338	0	-4.84752	-7.64386	-2.79634	74456	chr18	14988995	15047987	+	NR_045372	lncRNA	.	RIKEN cDNA 4933424G05 gene
4933424G06Rik	0	0	-7.64386	-7.64386	0	71166	chr1	36714538	36757960	+	NR_040290	lncRNA	1700104I15Rik	RIKEN cDNA 4933424G06 gene
4933425B07Rik	0.0266044	0.0258875	-4.98373	-5.01683	-0.0331023	74458	chr14	46602806	46637423	-	NR_046460	lncRNA	.	RIKEN cDNA 4933425B07 gene
4933425L06Rik	0	0	-7.64386	-7.64386	0	66763	chr13	105082122	105121782	+	NM_025751	protein_coding	.	RIKEN cDNA 4933425L06 gene
4933427D06Rik	0	0	-7.64386	-7.64386	0	232217	chr6	89096115	89110037	+	NM_175017	lncRNA	.	RIKEN cDNA 4933427D06 gene
4933427D14Rik	7.25257	6.16587	2.85949	2.62547	-0.234013	74477	chr11	72154097	72203371	-	NM_028963	protein_coding	C85113| Kiaa0753| MNR	RIKEN cDNA 4933427D14 gene
4933427E11Rik	0.0908026	0.177312	-3.38379	-2.45552	0.928273	66769	chr15	74709161	74710374	+	NR_033197	lncRNA	.	RIKEN cDNA 4933427E11 gene
4933427E13Rik	0	0	-7.64386	-7.64386	0	71234	chr11	25326107	25367137	+	NR_045853	lncRNA	RP23-117H24.2	RIKEN cDNA 4933427E13 gene
4933427G17Rik	0	0.0531093	-7.64386	-4.10509	3.53877	74466	chr7	120982509	121014787	+	NM_028955	protein_coding	.	RIKEN cDNA 4933427G17 gene
4933427I22Rik	0	0	-7.64386	-7.64386	0	71235	chr4	139926111	139943519	-	NR_045159	lncRNA	.	RIKEN cDNA 4933427I22 gene
4933428C19Rik	0	0	-7.64386	-7.64386	0	71293	chr4	40482840	40525548	-	NR_040644	lncRNA	.	RIKEN cDNA 4933428C19 gene
4933428G20Rik	1.08869	0.439217	0.129204	-1.17066	-1.29987	100141474	chr11	97490783	97500340	-	NM_001289118	protein_coding	.	RIKEN cDNA 4933428G20 gene
4933429K18Rik	0	0	-7.64386	-7.64386	0	71232	chr19	45726555	45730558	-	NR_045307	lncRNA	.	RIKEN cDNA 4933429K18 gene
4933429O19Rik	0	0	-7.64386	-7.64386	0	66770	chr14	48878873	48887112	+	NR_033783	lncRNA	1700031B11Rik	RIKEN cDNA 4933429O19 gene
4933430H16Rik	0	0	-7.64386	-7.64386	0	71285	chr7	82937938	82971391	-	NR_045855	lncRNA	.	RIKEN cDNA 4933430H16 gene
4933430I17Rik	0.145086	0.141238	-2.73614	-2.77361	-0.0374712	214106	chr4	62525369	62547993	+	NM_177607	protein_coding	bN189G18.7	RIKEN cDNA 4933430I17 gene
4933430M04Rik	0	0	-7.64386	-7.64386	0	71316	chr11	24481909	24569951	+	NR_045857	lncRNA	.	RIKEN cDNA 4933430M04 gene
4933430N04Rik	0	0	-7.64386	-7.64386	0	71249	chr8	9125412	9132288	-	NR_045854	lncRNA	.	RIKEN cDNA 4933430N04 gene
4933431E20Rik	1.80345	2.40628	0.854754	1.2698	0.415045	329735	chr3	107888850	107896213	-	NR_015459	lncRNA	.	RIKEN cDNA 4933431E20 gene
4933431G14Rik	0.0937721	0.0608812	-3.33975	-3.92399	-0.584237	71265	chr6	72120213	72123197	-	NR_045163	lncRNA	4930565C19Rik	RIKEN cDNA 4933431G14 gene
4933432G23Rik	0	0	-7.64386	-7.64386	0	71196	chr9	118429839	118437048	+	NR_040716	lncRNA	.	RIKEN cDNA 4933432G23 gene
4933432I03Rik	0	0	-7.64386	-7.64386	0	71264	chr14	102987412	103033803	-	NR_045657	lncRNA	.	RIKEN cDNA 4933432I03 gene
4933432I09Rik	0	0	-7.64386	-7.64386	0	66779	chr16	18209686	18213863	-	NR_027843	lncRNA	.	RIKEN cDNA 4933432I09 gene
4933432K03Rik	0	0	-7.64386	-7.64386	0	75793	chr7	121587386	121589836	-	NR_102286	lncRNA	1700001C18Rik| 4930433G11Rik| AI428127	RIKEN cDNA 4933432K03 gene
4933433C11Rik	0.0747752	0	-3.64792	-7.64386	-3.99594	.	chr2	25212559	25214630	-	NM_028961	.	.	.
4933433F19Rik	0	0	-7.64386	-7.64386	0	71314	chr8	30568395	30575573	+	NR_045856	lncRNA	.	RIKEN cDNA 4933433F19 gene
4933433G08Rik	0	0	-7.64386	-7.64386	0	66785	chr9	61103012	61105386	-	NR_105026	lncRNA	.	RIKEN cDNA 4933433G08 gene
4933433G15Rik	0	0.094418	-7.64386	-3.33035	4.31351	71274	chr9	75410184	75415537	+	NR_040719	lncRNA	4921522K19Rik	RIKEN cDNA 4933433G15 gene
4933433G19Rik	0.0535282	0	-4.09472	-7.64386	-3.54913	71226	chr13	66996818	67032405	-	NR_045851	lncRNA	.	RIKEN cDNA 4933433G19 gene
4933433H22Rik	0	0.11256	-7.64386	-3.08853	4.55533	74473	chr17	84078660	84089875	+	NR_045458	lncRNA	.	RIKEN cDNA 4933433H22 gene
4933434E20Rik	52.7841	49.5019	5.72217	5.62956	-0.0926105	99650	chr3	90051636	90063341	+	NM_001287087	protein_coding	5730552F22Rik| AI462154| NICE-3| NS5ATP4	RIKEN cDNA 4933434E20 gene
4933436E23Rik	0	0	-7.64386	-7.64386	0	71209	chr1	139379452	139402852	+	NR_040455	lncRNA	.	RIKEN cDNA 4933436E23 gene
4933436H12Rik	0	0	-7.64386	-7.64386	0	71244	chr7	68417424	68426133	+	NR_046208	lncRNA	.	RIKEN cDNA 4933436H12 gene
4933436I01Rik	0	0	-7.64386	-7.64386	0	66780	chrX	67919864	67921450	-	NM_025763	protein_coding	.	RIKEN cDNA 4933436I01 gene
4933438B17Rik	0	0	-7.64386	-7.64386	0	71247	chr5	127030789	127088529	+	NR_040685	lncRNA	.	RIKEN cDNA 4933438B17 gene
4933438K21Rik	0	0	-7.64386	-7.64386	0	71270	chr4	147063366	147068436	-	NR_045446	lncRNA	.	RIKEN cDNA 4933438K21 gene
4933439C10Rik	3.14924	2.18534	1.65729	1.13115	-0.526138	74476	chr11	59505685	59511067	+	NR_015585	lncRNA	2610028M21Rik	RIKEN cDNA 4933439C10 gene
4933439K11Rik	0	0.182953	-7.64386	-2.41156	5.2323	71319	chr1	172541620	172550806	-	NR_040558	lncRNA	.	RIKEN cDNA 4933439K11 gene
4933440J02Rik	0	0	-7.64386	-7.64386	0	71321	chr10	111586719	111594273	-	NR_045344	lncRNA	.	RIKEN cDNA 4933440J02 gene
4933440M02Rik	0.155643	0.0606243	-2.63807	-3.92963	-1.29156	71208	chr7	125331782	125349786	-	NR_045804	lncRNA	.	RIKEN cDNA 4933440M02 gene
5031410I06Rik	0.0166935	0.0324296	-5.52659	-4.73968	0.786917	381622	chr5	26098668	26105314	-	NM_207657	protein_coding	.	RIKEN cDNA 5031410I06 gene
5031414D18Rik	0.411736	0.563732	-1.26279	-0.814179	0.448615	271221	chr14	75016027	75052532	+	NM_198642	protein_coding	Gm744| Gm911| Kiaa0226l	RIKEN cDNA 5031414D18 gene
5031425E22Rik	4.08691	3.68669	2.03277	1.88428	-0.148493	269630	chr5	23431808	23434353	-	NR_040469	lncRNA	.	RIKEN cDNA 5031425E22 gene
5031425F14Rik	0	0	-7.64386	-7.64386	0	319684	chr2	166447451	166458770	+	NR_015558	lncRNA	.	RIKEN cDNA 5031425F14 gene
5031426D15Rik	0.141631	0.00763063	-2.76974	-6.30693	-3.53719	68144	chr2	6922702	6928722	-	NR_027890	lncRNA	.	RIKEN cDNA 5031426D15 gene
5031434C07Rik	0	0	-7.64386	-7.64386	0	100503613	chr6	112286794	112290319	-	NR_045987	lncRNA	.	RIKEN cDNA 5031434C07 gene
5031434O11Rik	0.17881	0	-2.44371	-7.64386	-5.20014	100039684	chr3	51559757	51567116	+	NR_033624	lncRNA	100039684| AI481280| Gm2370	RIKEN cDNA 5031434O11 gene
5031439G07Rik	26.2243	32.2727	4.71311	5.01247	0.299358	223739	chr15	84945720	84987971	-	NM_001033273	protein_coding	AW554572| mKIAA0930	RIKEN cDNA 5031439G07 gene
5033403F01Rik	0.0393173	0.115039	-4.49599	-3.05842	1.43756	75958	chr13	38960619	38966297	+	NR_131019	lncRNA	.	RIKEN cDNA 5033403F01 gene
5033403H07Rik	0	0	-7.64386	-7.64386	0	75954	chr5	52973012	52992292	-	NR_040413	lncRNA	.	RIKEN cDNA 5033403H07 gene
5033404E19Rik	0	0	-7.64386	-7.64386	0	114668	chr1	185497306	185498014	+	NR_033600	misc_RNA	.	RIKEN cDNA 5033404E19 gene
5033406O09Rik	0.871342	2.22336	-0.190434	1.15598	1.34642	77675	chr12	111941991	111944482	-	NR_029464	lncRNA	9130204G15Rik	RIKEN cDNA 5033406O09 gene
5033428I22Rik	0	0	-7.64386	-7.64386	0	75996	chr8	57332435	57354580	+	NR_131041	lncRNA	.	RIKEN cDNA 5033428I22 gene
5330411J11Rik	0.0318226	0	-4.76326	-7.64386	-2.88059	76676	chr2	59382493	59386682	-	NR_040510	lncRNA	.	RIKEN cDNA 5330411J11 gene
5330413P13Rik	0	0	-7.64386	-7.64386	0	414081	chr2	131820006	131847656	-	NR_029381	lncRNA	.	RIKEN cDNA 5330413P13 gene
5330417C22Rik	0.0146655	0.0427192	-5.66819	-4.38929	1.2789	229722	chr3	108458069	108536522	-	NM_001033304	protein_coding	BB183350| mKIAA1324	RIKEN cDNA 5330417C22 gene
5330426P16Rik	1.64952	0.996583	0.726413	0.00228198	-0.724131	.	chr16	50726751	50732773	-	NR_028300	.	.	.
5330434G04Rik	0	0	-7.64386	-7.64386	0	100043213	chrX	105372994	105391754	-	NR_015552	lncRNA	100043213	RIKEN cDNA 5330434G04 gene
5330439B14Rik	0	0	-7.64386	-7.64386	0	321015	chr6	142614595	142626462	+	NR_037679	lncRNA	.	RIKEN cDNA 5330439B14 gene
5430401F13Rik	0	0	-7.64386	-7.64386	0	71392	chr6	131543762	131553757	+	NM_001244628	protein_coding	.	RIKEN cDNA 5430401F13 gene
5430402E10Rik	0	0	-7.64386	-7.64386	0	71351	chrX	77919786	77925062	-	NM_027768	protein_coding	.	RIKEN cDNA 5430402E10 gene
5430402O13Rik	0.0571381	0.122129	-4.00838	-2.97563	1.03274	73183	chr6	50566643	50594865	+	NR_015581	lncRNA	3110047M22Rik	RIKEN cDNA 5430402O13 gene
5430403N17Rik	0	0.05684	-7.64386	-4.01532	3.62854	330737	chr8	35864085	35882957	-	NR_046181	lncRNA	5430403N17	RIKEN cDNA 5430403N17 gene
5430405H02Rik	6.00604	5.61987	2.58761	2.49182	-0.0957949	74487	chr2	156852403	156862945	-	NR_027914	lncRNA	2610307N17Rik	RIKEN cDNA 5430405H02 gene
5430416N02Rik	20.0514	27.9836	4.32599	4.80677	0.480777	100503199	chr5	100420842	100429535	-	NR_034038	lncRNA	100041797| Adapt33| Gm3514	RIKEN cDNA 5430416N02 gene
5430416O09Rik	0.176891	0.114444	-2.45885	-3.06559	-0.60674	71406	chr4	43730034	43734534	+	NR_033355	lncRNA	AI481365| RP23-430M12.2	RIKEN cDNA 5430416O09 gene
5430419D17Rik	0	0.0163283	-7.64386	-5.55109	2.09277	71395	chr7	131174402	131250945	+	NM_175166	protein_coding	.	RIKEN cDNA 5430419D17 gene
5430421F17Rik	0.0657133	0.0425923	-3.82187	-4.39313	-0.571253	74489	chr8	25302650	25306270	-	NR_040352	lncRNA	.	RIKEN cDNA 5430421F17 gene
5430421N21Rik	0	0	-7.64386	-7.64386	0	.	chr15	101485130	101489792	-	NM_001201323	.	.	.
5430425K12Rik	0.393387	0.511959	-1.32776	-0.951878	0.375879	71416	chr13	80940403	80948597	+	NR_103550	lncRNA	.	RIKEN cDNA 5430425K12 gene
5430427M07Rik	0	0	-7.64386	-7.64386	0	71349	chr12	91045848	91056635	+	NR_045858	lncRNA	.	RIKEN cDNA 5430427M07 gene
5430427O19Rik	0	0	-7.64386	-7.64386	0	71398	chrX	85870273	85891499	+	NM_001163539	protein_coding	.	RIKEN cDNA 5430427O19 gene
5430428K19Rik	0	0	-7.64386	-7.64386	0	71422	chrX	6452376	6574663	-	NR_045426	lncRNA	.	RIKEN cDNA 5430428K19 gene
5430431A17Rik	0.077713	0	-3.59574	-7.64386	-4.04811	71368	chr7	44484517	44485413	+	NR_131001	lncRNA	.	RIKEN cDNA 5430431A17 gene
5430434I15Rik	0.0435433	0.127499	-4.36458	-2.91595	1.44864	71342	chr3	38203151	38208119	-	NR_040541	lncRNA	.	RIKEN cDNA 5430434I15 gene
5430437J10Rik	0.047672	0	-4.24682	-7.64386	-3.39704	71432	chr15	5496318	5594983	+	NR_045274	lncRNA	.	RIKEN cDNA 5430437J10 gene
5430440P10Rik	0.113006	0.055278	-3.08307	-4.05222	-0.969157	71362	chr14	105427559	105437716	+	NR_045859	lncRNA	.	RIKEN cDNA 5430440P10 gene
5530400C23Rik	0	0	-7.64386	-7.64386	0	232426	chr6	133292216	133295790	+	NM_027784	protein_coding	GRP	RIKEN cDNA 5530400C23 gene
5530401A14Rik	0	0	-7.64386	-7.64386	0	71388	chr11	81860677	81894582	+	NR_038010	lncRNA	.	RIKEN cDNA 5530401A14 gene
5530601H04Rik	1.8946	1.90202	0.925696	0.93132	0.00562431	71445	chrX	105040854	105070124	-	NR_015467	lncRNA	AI835882	RIKEN cDNA 5530601H04 gene
5730403I07Rik	0	0	-7.64386	-7.64386	0	70487	chr9	77366412	77399416	-	NR_040378	lncRNA	.	RIKEN cDNA 5730403I07 gene
5730405O15Rik	0.672103	0.395285	-0.562553	-1.3209	-0.758348	70489	chrX	13042015	13045295	+	NR_038158	lncRNA	.	RIKEN cDNA 5730405O15 gene
5730408K05Rik	44.4544	25.8439	5.47442	4.69203	-0.782386	67531	chr19	8888387	8888770	-	NR_027866	lncRNA	2610018C13Rik	RIKEN cDNA 5730408K05 gene
5730409E04Rik	1.79792	2.63442	0.850335	1.40022	0.549886	230757	chr4	126609854	126614371	+	NM_001145950	protein_coding	7530403E16Rik| AI849033	RIKEN cDNA 5730409E04Rik gene
5730412P04Rik	0	0	-7.64386	-7.64386	0	70491	chrX	136104603	136115420	+	NR_045424	lncRNA	.	RIKEN cDNA 5730412P04 gene
5730416F02Rik	0	0	-7.64386	-7.64386	0	70550	chrX	109001485	109002296	+	NR_033596	misc_RNA	.	RIKEN cDNA 5730416F02 gene
5730420D15Rik	0	0.0938952	-7.64386	-3.33796	4.3059	70523	chr10	95417375	95428640	+	NR_045339	lncRNA	.	RIKEN cDNA 5730420D15 gene
5730422E09Rik	0.0909752	0.0295277	-3.38119	-4.8561	-1.47491	433966	chr5	149119565	149182036	-	NR_015478	lncRNA	.	RIKEN cDNA 5730422E09 gene
5730435O14Rik	0	0	-7.64386	-7.64386	0	70538	chr10	41568016	41576476	+	NR_045341	lncRNA	.	RIKEN cDNA 5730435O14 gene
5730455P16Rik	5.36807	5.51596	2.42575	2.46492	0.0391725	70591	chr11	80360492	80378015	-	NM_027472	protein_coding	.	RIKEN cDNA 5730455P16 gene
5730457N03Rik	0	0	-7.64386	-7.64386	0	.	chr6	52308389	52314832	-	NR_038163	.	.	.
5730460C07Rik	0	0	-7.64386	-7.64386	0	70594	chr3	153789305	153792087	-	NR_045801	lncRNA	.	RIKEN cDNA 5730460C07 gene
5730480H06Rik	0.987636	0.786762	-0.0106633	-0.336861	-0.326198	70592	chr5	48395573	48414294	+	NR_045500	lncRNA	.	RIKEN cDNA 5730480H06 gene
5730488B01Rik	0	0	-7.64386	-7.64386	0	70602	chr4	44702800	44705110	+	NR_073462	lncRNA	.	RIKEN cDNA 5730488B01 gene
5730507C01Rik	1.37435	1.45365	0.463989	0.544634	0.0806452	236366	chr12	18514510	18535254	+	NM_001033157	protein_coding	.	RIKEN cDNA 5730507C01 gene
5730508B09Rik	6.64962	8.04118	2.73436	3.0083	0.273948	70617	chr3	127869688	127896323	-	NM_027482	protein_coding	2700063A17Rik| C80506	RIKEN cDNA 5730508B09 gene
5730522E02Rik	0	0	-7.64386	-7.64386	0	70626	chr11	25616846	26210576	-	NR_027973	lncRNA	RP23-306I3.1	RIKEN cDNA 5730522E02 gene
5730559C18Rik	20.2132	20.4238	4.33758	4.35253	0.0149499	67313	chr1	136213522	136234280	-	NM_028872	protein_coding	1700034M08Rik| 4933426C09Rik| AI586180| D1Mgi54	RIKEN cDNA 5730559C18 gene
5830411N06Rik	0	0	-7.64386	-7.64386	0	244234	chr7	140247301	140299791	+	NM_175533	protein_coding	Scart2	RIKEN cDNA 5830411N06 gene
5830415F09Rik	2.30161	2.50634	1.20577	1.32846	0.122683	.	chr4	46376975	46389423	-	NM_029086	.	.	.
5830416I19Rik	0.0566306	0.0550281	-4.02021	-4.05822	-0.0380088	74757	chr5	64044973	64050226	+	NR_045384	lncRNA	.	RIKEN cDNA 5830416I19 gene
5830416P10Rik	2.6539	4.36309	1.41083	2.127	0.716173	.	chr19	53441212	53464796	-	NR_028427	.	.	.
5830417I10Rik	4.99504	4.12279	2.32194	2.04537	-0.27657	100302730	chr3	88777057	88829371	+	NR_028359	misc_RNA	3632445O20Rik| AA387005	RIKEN cDNA 5830417I10 gene
5830418P13Rik	0	0	-7.64386	-7.64386	0	100529079	chr9	103423578	103461260	+	NR_040466	lncRNA	.	RIKEN cDNA 5830418P13 gene
5830428M24Rik	0.110846	0.0541033	-3.10972	-4.08062	-0.970898	76062	chr12	69464787	69475550	-	NR_038061	lncRNA	100040862| Gm3007	RIKEN cDNA 5830428M24 gene
5830432E09Rik	0.0710589	0.0692554	-3.71674	-3.75136	-0.0346211	67765	chr7	135648457	135652314	-	NR_015548	lncRNA	.	RIKEN cDNA 5830432E09 gene
5830444B04Rik	0	0.0173582	-7.64386	-5.48305	2.1608	641454	chr4	155400969	155421704	-	NR_102284	lncRNA	.	RIKEN cDNA 5830444B04 gene
5830454E08Rik	1.27862	0.167659	0.360218	-2.534	-2.89422	76100	chr9	120577331	120578073	+	NR_073359	lncRNA	.	RIKEN cDNA 5830454E08 gene
5830473C10Rik	0	0.0437273	-7.64386	-4.35913	3.28473	622307	chr5	90561209	90597906	+	NM_001252661	protein_coding	Arg| Gm17754	RIKEN cDNA 5830473C10 gene
5930403L14Rik	0	0	-7.64386	-7.64386	0	320939	chr4	154630691	154636367	-	NR_045643	lncRNA	.	RIKEN cDNA 5930403L14 gene
5930412G12Rik	0	0	-7.64386	-7.64386	0	319616	chr5	128579130	128600687	-	NR_015517	lncRNA	.	RIKEN cDNA 5930412G12 gene
5930430L01Rik	1.75641	1.98157	0.816731	0.99028	0.173549	319982	chr5	148990056	148995214	-	NR_102384	lncRNA	.	RIKEN cDNA 5930430L01 gene
5930438M14Rik	0	0	-7.64386	-7.64386	0	328324	chr13	101232127	101247551	+	NR_046158	lncRNA	5930438M14	RIKEN cDNA 5930438M14 gene
6030407O03Rik	0	0	-7.64386	-7.64386	0	109198	chr1	73618381	73864466	-	NR_045311	lncRNA	.	RIKEN cDNA 6030407O03 gene
6030408B16Rik	0	0.101128	-7.64386	-3.23612	4.40773	77717	chr15	101293212	101297426	+	NR_033803	lncRNA	AI225877	RIKEN cDNA 6030408B16 gene
6030419C18Rik	2.50928	4.55844	1.33015	2.19012	0.859976	319477	chr9	58488603	58499742	+	NM_176921	protein_coding	.	RIKEN cDNA 6030419C18 gene
6030440G07Rik	0	0.0504331	-7.64386	-4.17311	3.47075	77878	chr12	110994398	111013872	+	NR_036598	lncRNA	.	RIKEN cDNA 6030440G07 gene
6030443J06Rik	0.511111	0.377357	-0.954247	-1.38701	-0.432761	320719	chr5	22550413	22558171	+	NR_102315	lncRNA	1700030G06Rik	RIKEN cDNA 6030443J06 gene
6030458C11Rik	11.4704	10.1904	3.52047	3.34985	-0.170626	77877	chr15	12808177	12824657	-	NM_029998	protein_coding	.	RIKEN cDNA 6030458C11 gene
6030466F02Rik	0	0	-7.64386	-7.64386	0	234863	chr8	123733958	123739941	+	NR_040702	lncRNA	.	RIKEN cDNA 6030466F02 gene
6030468B19Rik	0.0524844	0	-4.12069	-7.64386	-3.52317	77727	chr11	117797660	117807308	+	NM_029964	protein_coding	.	RIKEN cDNA 6030468B19 gene
6030469F06Rik	0.0338472	0	-4.68605	-7.64386	-2.95781	100043065	chr12	31168862	31185922	+	NR_102715	lncRNA	.	RIKEN cDNA 6030469F06 gene
6030471H07Rik	0	0	-7.64386	-7.64386	0	78238	chr4	84042040	84044879	-	NR_130998	lncRNA	.	RIKEN cDNA 6030471H07 gene
6030498E09Rik	0	0	-7.64386	-7.64386	0	77883	chrX	38772780	38962688	+	NM_183126	protein_coding	.	RIKEN cDNA 6030498E09 gene
6230400D17Rik	0.518891	0.507218	-0.932661	-0.96517	-0.0325087	76133	chr14	20702012	20703099	-	NR_029446	lncRNA	.	RIKEN cDNA 6230400D17 gene
6330403A02Rik	0	0	-7.64386	-7.64386	0	.	chr1	180432373	180483504	-	NM_001081227	.	.	.
6330403K07Rik	0.493117	0.544421	-1.00544	-0.864016	0.141427	103712	chr11	71031941	71033617	-	NM_134022	protein_coding	AI415455| AV161034| RP23-83I13.10| UGS148	RIKEN cDNA 6330403K07 gene
6330407A03Rik	0	0.163241	-7.64386	-2.5714	5.07246	70720	chr4	3714964	3716806	+	NR_028126	lncRNA	.	RIKEN cDNA 6330407A03 gene
6330408A02Rik	3.8009	4.11467	1.92824	2.04253	0.114291	321008	chr7	13258967	13278721	-	NM_177312	protein_coding	.	RIKEN cDNA 6330408A02 gene
6330409D20Rik	0	0.0980789	-7.64386	-3.27818	4.36568	70730	chr2	32732621	32741016	-	NM_027529	protein_coding	AA517851	RIKEN cDNA 6330409D20 gene
6330410L21Rik	0	0	-7.64386	-7.64386	0	319224	chr3	129753758	129763882	+	NR_040589	lncRNA	.	RIKEN cDNA 6330410L21 gene
6330415B21Rik	0	0	-7.64386	-7.64386	0	70753	chr6	77380257	77382475	-	NR_045141	lncRNA	.	RIKEN cDNA 6330415B21 gene
6330415G19Rik	0.415836	0.125469	-1.24867	-2.93822	-1.68955	320020	chr17	23550799	23565294	+	NR_126485	lncRNA	.	RIKEN cDNA 6330415G19 gene
6330416G13Rik	0.962161	2.02368	-0.048172	1.02054	1.06871	230279	chr4	63560360	63586353	+	NM_144905	protein_coding	AW492431| bM230C2.2	RIKEN cDNA 6330416G13 gene
6330418K02Rik	1.11228	1.68296	0.159991	0.755281	0.59529	69004	chr5	138264045	138266661	+	NR_045821	lncRNA	.	RIKEN cDNA 6330418K02 gene
6330549D23Rik	0.453732	0.389921	-1.12428	-1.34036	-0.216087	229613	chr3	96606662	96629819	-	NR_003619	misc_RNA	.	RIKEN cDNA 6330549D23 gene
6430411K18Rik	0	0	-7.64386	-7.64386	0	76880	chr12	109591537	109592851	+	NR_002848	lncRNA	PEG11as	RIKEN cDNA 6430411K18 gen
6430503K07Rik	0	0	-7.64386	-7.64386	0	78068	chr2	147187424	147188482	+	NR_108091	lncRNA	.	RIKEN cDNA 6430503K07 gene
6430531B16Rik	0.335451	0.28086	-1.55448	-1.80662	-0.252138	381933	chr7	139972303	139978755	-	NM_001033465	protein_coding	Gm1093	RIKEN cDNA 6430531B16 gene
6430548M08Rik	0.676372	0.591339	-0.553485	-0.745795	-0.19231	234797	chr8	120114152	120165307	+	NM_172286	protein_coding	AW049007| Kiaa0513| mKIAA0513	RIKEN cDNA 6430548M08 gene
6430550D23Rik	0.109806	0.293863	-3.12273	-1.74244	1.38029	320095	chr2	156000443	156007977	-	NM_001145352	protein_coding	.	RIKEN cDNA 6430550D23 gene
6430562O15Rik	0.755124	0.323511	-0.395693	-1.60599	-1.21029	320893	chr13	99410836	99412826	-	NR_015515	lncRNA	.	RIKEN cDNA 6430562O15 gene
6430571L13Rik	0	0.0379095	-7.64386	-4.54256	3.1013	235599	chr9	107340640	107349683	+	NM_175486	protein_coding	.	RIKEN cDNA 6430571L13 gene
6430573F11Rik	0	0	-7.64386	-7.64386	0	319582	chr8	36489191	36513013	+	NM_176952	protein_coding	Kiaa1456| TRM9L	RIKEN cDNA 6430573F11 gene
6430584L05Rik	0	0	-7.64386	-7.64386	0	330324	chr6	55396887	55412285	+	NR_046179	lncRNA	6430584L05	RIKEN cDNA 6430584L05 gene
6430706D22Rik	33.2777	26.8589	5.0567	4.7476	-0.309104	.	chr1	88263113	88269408	-	NR_040291	.	.	.
6430710C18Rik	0	0	-7.64386	-7.64386	0	76218	chr2	72745846	72813717	-	NR_102348	lncRNA	5033406J01Rik	RIKEN cDNA 6430710C18 gene
6530402F18Rik	0.0335944	0.0108662	-4.69546	-5.9779	-1.28243	76220	chr2	29245116	29252993	-	NR_029460	lncRNA	mKIAA1857	RIKEN cDNA 6530402F18 gene
6530403H02Rik	0.148077	0.047906	-2.70767	-4.24042	-1.53275	320739	chr3	120454334	120886732	-	NR_130170	lncRNA	.	RIKEN cDNA 6530403H02 gene
6530411M01Rik	0	0	-7.64386	-7.64386	0	67791	chr17	9147719	9168022	-	NR_027881	lncRNA	.	RIKEN cDNA 6530411M01 gene
6720468P15Rik	0	0	-7.64386	-7.64386	0	78073	chr19	57508564	57512788	+	NR_040306	lncRNA	.	RIKEN cDNA 6720468P15 gene
6720483E21Rik	0.300431	0.146788	-1.71108	-2.71987	-1.00879	77741	chr1	20888650	20890473	-	NR_040492	lncRNA	.	RIKEN cDNA 6720483E21 gene
6720489N17Rik	1.71214	0.786133	0.780008	-0.338008	-1.11802	211378	chr13	62603015	62624182	-	NM_173381	protein_coding	9330128I06	RIKEN cDNA 6720489N17 gene
6820408C15Rik	0	0.0903625	-7.64386	-3.39043	4.25342	228778	chr2	152415587	152444330	+	NM_001289738	protein_coding	.	RIKEN cDNA 6820408C15 gene
6820431F20Rik	51.0264	50.3733	5.67331	5.65473	-0.0185828	547150	chr8	20268286	20297432	-	NR_030708	misc_RNA	.	RIKEN cDNA 6820431F20 gene
7420426K07Rik	0	0	-7.64386	-7.64386	0	546157	chr9	98903119	98904622	+	NM_001033983	protein_coding	.	RIKEN cDNA 7420426K07 gene
7420461P10Rik	0	0	-7.64386	-7.64386	0	100038657	chr1	162647243	162658219	-	NM_001177581	protein_coding	ENSMUSG00000073516	RIKEN cDNA 7420461P10 gene
7420700N18Rik	0.0885113	0.0287237	-3.41872	-4.89009	-1.47138	74517	chr8	31367749	31382438	+	NR_046272	lncRNA	.	RIKEN cDNA 7420700N18 gene
7420701I03Rik	0	0	-7.64386	-7.64386	0	71457	chr12	11047813	11078741	+	NR_045860	lncRNA	.	RIKEN cDNA 7420701I03 gene
7530416G11Rik	0	0	-7.64386	-7.64386	0	328577	chr15	85492736	85503227	-	NM_001256072	protein_coding	.	RIKEN cDNA 7530416G11 gene
7630403G23Rik	0	0	-7.64386	-7.64386	0	77119	chr9	34042371	34059019	+	NR_040744	lncRNA	.	RIKEN cDNA 7630403G23 gene
8030411F24Rik	0	0	-7.64386	-7.64386	0	78609	chr2	148782009	148785936	+	NM_030135	protein_coding	Cst14	RIKEN cDNA 8030411F24 gene
8030423F21Rik	0	0	-7.64386	-7.64386	0	211001	chr5	52607550	52619011	-	NR_045738	lncRNA	.	RIKEN cDNA 8030423F21 gene
8030423J24Rik	0	0	-7.64386	-7.64386	0	77166	chr13	70882948	70884503	+	NM_029873	protein_coding	.	RIKEN cDNA 8030423J24 gene
8030442B05Rik	0	0	-7.64386	-7.64386	0	77543	chr2	11338366	11398500	-	NR_040615	lncRNA	.	RIKEN cDNA 8030442B05 gene
8030443G20Rik	0.131334	0.0643499	-2.87478	-3.84996	-0.97518	77173	chr4	108942843	108972077	-	NR_040664	lncRNA	.	RIKEN cDNA 8030443G20 gene
8030451O07Rik	0	0	-7.64386	-7.64386	0	319533	chr16	72226383	72234327	-	NR_131116	lncRNA	.	RIKEN cDNA 8030451O07 gene
8030455M16Rik	0	0	-7.64386	-7.64386	0	77171	chr8	110047432	110057176	+	NR_131069	lncRNA	.	RIKEN cDNA 8030455M16 gene
8030462N17Rik	4.05995	5.43551	2.02324	2.44374	0.420504	212163	chr18	77633281	77714010	-	NM_178670	protein_coding	Akd2| Ark2N	RIKEN cDNA 8030462N17 gene
8430408G22Rik	1.31812	0.644743	0.403944	-0.622059	-1.026	213393	chr6	116650684	116652847	+	NM_001166580	protein_coding	Depp| Fseg	RIKEN cDNA 8430408G22 gene
8430419L09Rik	2.58325	1.5307	1.37198	0.618896	-0.753081	.	chr6	135197987	135236240	+	NM_028982	.	.	.
8430422H06Rik	0	0	-7.64386	-7.64386	0	74529	chr18	14232306	14278542	+	NR_045373	lncRNA	.	RIKEN cDNA 8430422H06 gene
8430423G03Rik	0.211416	0	-2.20812	-7.64386	-5.43574	71473	chr5	148950250	148951658	+	NR_040686	lncRNA	.	RIKEN cDNA 8430423G03 gene
8430426J06Rik	0.0633046	0.0620084	-3.87187	-3.89951	-0.0276408	78102	chr15	81242654	81251862	-	NR_077231	lncRNA	.	RIKEN cDNA 8430426J06 gene
8430429K09Rik	1.69017	2.76803	0.76143	1.47146	0.710033	71523	chr11	3452437	3479831	+	NR_028317	lncRNA	.	RIKEN cDNA 8430429K09 gene
8430430B14Rik	0	0	-7.64386	-7.64386	0	78148	chr17	83998552	84013408	+	NR_130994	lncRNA	.	RIKEN cDNA 8430430B14 gene
8430431K14Rik	0	0	-7.64386	-7.64386	0	78103	chr19	31213543	31216396	-	NR_002849	lncRNA	.	RIKEN cDNA 8430431K14 gene
8430436N08Rik	0	0	-7.64386	-7.64386	0	71510	chr4	7560688	7573801	+	NR_040645	lncRNA	.	RIKEN cDNA 8430436N08 gene
8430437L04Rik	0	0	-7.64386	-7.64386	0	74541	chr2	72703510	72729468	+	NR_040503	lncRNA	.	RIKEN cDNA 8430437L04 gene
9030025P20Rik	1.14756	1.27886	0.204842	0.360488	0.155646	100041574	chr17	14978864	14991577	+	NM_001123370	protein_coding	D17Zt9e	RIKEN cDNA 9030025P20 gene
9030204H09Rik	0	0	-7.64386	-7.64386	0	77665	chr2	35819190	35823385	+	NR_040618	lncRNA	.	RIKEN cDNA 9030204H09 gene
9030404E10Rik	0.228138	0.133652	-2.10074	-2.85046	-0.749716	71528	chr16	30021842	30039479	-	NR_045878	lncRNA	.	RIKEN cDNA 9030404E10 gene
9030612E09Rik	0.0550991	0.0804353	-4.05651	-3.54902	0.507489	74530	chr10	43174699	43176565	+	NR_102361	lncRNA	.	RIKEN cDNA 9030612E09 gene
9030617O03Rik	0.0756807	0.0146979	-3.63163	-5.66581	-2.03418	217830	chr12	100779123	100872610	+	NM_145448	protein_coding	.	RIKEN cDNA 9030617O03 gene
9030619P08Rik	0	0	-7.64386	-7.64386	0	105892	chr15	75427606	75431829	-	NR_108041	misc_RNA	.	RIKEN cDNA 9030619P08 gene
9030624G23Rik	2.06379	2.09289	1.04879	1.06894	0.0201518	66808	chr12	24043202	24097269	-	NM_001256489	protein_coding	.	RIKEN cDNA 9030624G23 gene
9030624J02Rik	17.5912	19.8047	4.13719	4.30814	0.170943	71517	chr7	118740271	118841491	+	NM_027815	protein_coding	2610029J22Rik	RIKEN cDNA 9030624J02 gene
9030625G05Rik	0	0	-7.64386	-7.64386	0	71545	chr18	74972764	74981547	-	NR_110446	lncRNA	.	RIKEN cDNA 9030625G05 gene
9130008F23Rik	4.00653	5.76476	2.00415	2.52851	0.524359	71583	chr17	40875482	40880558	-	NM_027834	protein_coding	.	RIKEN cDNA 9130008F23 gene
9130011E15Rik	7.16123	7.76589	2.84121	2.95808	0.116865	71617	chr19	45818144	45998488	-	NM_198296	protein_coding	AI431055| AW050122	RIKEN cDNA 9130011E15 gene
9130015A21Rik	0.266653	0	-1.88016	-7.64386	-5.76369	71581	chr12	35672291	35695118	-	NR_045050	lncRNA	100043575| Gm4527	RIKEN cDNA 9130015A21 gene
9130015L21Rik	0	0	-7.64386	-7.64386	0	71613	chr2	160016653	160040620	+	NR_040499	lncRNA	.	RIKEN cDNA 9130015L21 gene
9130019O22Rik	2.91581	5.51495	1.54637	2.46466	0.918287	78921	chr7	127382260	127387166	-	NM_030226	protein_coding	.	RIKEN cDNA 9130019O22 gene
9130019P16Rik	0.0106908	0	-5.99394	-7.64386	-1.64992	100042056	chr6	54269681	54430221	-	NR_033635	lncRNA	6430501H15Rik| OTTMUSG00000023151	RIKEN cDNA 9130019P16 gene
9130023H24Rik	1.4642	2.32952	0.555031	1.22313	0.668095	100043133	chr7	128234451	128238031	-	NM_177001	protein_coding	GLI4	RIKEN cDNA 9130023H24 gene
9130024F11Rik	0.415744	0.277472	-1.24899	-1.82382	-0.574835	329160	chr1	56971469	56975196	+	NR_024326	lncRNA	B530002L08| EG329160	RIKEN cDNA 9130024F11 gene
9130204L05Rik	0	0	-7.64386	-7.64386	0	229550	chr3	91088137	91090805	-	NM_001101461	protein_coding	Gm127	RIKEN cDNA 9130204L05 gene
9130209A04Rik	0	0.191981	-7.64386	-2.34387	5.29998	77668	chr18	47452668	47470868	+	NR_033453	lncRNA	.	RIKEN cDNA 9130209A04 gene
9130221F21Rik	0	0	-7.64386	-7.64386	0	330350	chr6	72013896	72042528	-	NR_046180	lncRNA	9130221F21	RIKEN cDNA 9130221F21 gene
9130221H12Rik	10.8238	12.2489	3.4368	3.61517	0.178368	77124	chr7	25228723	25230264	+	NR_046001	lncRNA	AU016887	RIKEN cDNA 9130221H12 gene
9130227L01Rik	0	0	-7.64386	-7.64386	0	329159	chr1	55931241	55972098	+	NR_045837	lncRNA	.	RIKEN cDNA 9130227L01 gene
9130230L23Rik	0.0366684	0	-4.5849	-7.64386	-3.05895	231253	chr5	65987928	66004285	-	NR_027961	lncRNA	.	RIKEN cDNA 9130230L23 gene
9130401M01Rik	35.5477	31.7252	5.15189	4.98778	-0.164103	75758	chr15	58022271	58034294	-	NM_029418	protein_coding	AI849328	RIKEN cDNA 9130401M01 gene
9130409I23Rik	0	0	-7.64386	-7.64386	0	619326	chr1	181051237	181060667	+	NM_001033819	protein_coding	.	RIKEN cDNA 9130409I23 gene
9130409J20Rik	0.211635	0.557667	-2.20666	-0.829647	1.37702	71576	chr11	66956638	66965014	+	NR_130645	lncRNA	.	RIKEN cDNA 9130409J20 gene
9230009I02Rik	0	0	-7.64386	-7.64386	0	619293	chr11	51085087	51091835	+	NR_045865	lncRNA	.	RIKEN cDNA 9230009I02 gene
9230102K24Rik	0	0	-7.64386	-7.64386	0	109335	chr10	110600650	110615961	+	NR_028438	lncRNA	.	RIKEN cDNA 9230102K24 gene
9230102O04Rik	0	0	-7.64386	-7.64386	0	77682	chr2	9883041	9889540	-	NR_040511	lncRNA	.	RIKEN cDNA 9230102O04 gene
9230104L09Rik	0	0	-7.64386	-7.64386	0	77705	chr2	148846714	148850934	-	NM_029960	protein_coding	mCST E2	RIKEN cDNA 9230104L09 gene
9230105E05Rik	0.626828	0.609475	-0.662396	-0.702574	-0.0401776	320626	chr10	120389523	120392793	+	NR_040626	lncRNA	.	RIKEN cDNA 9230105E05 gene
9230110C19Rik	0.462235	0.22515	-1.09778	-2.11935	-1.02157	234912	chr9	8021672	8042823	-	NM_199017	protein_coding	.	RIKEN cDNA 9230110C19 gene
9230110F15Rik	0	0	-7.64386	-7.64386	0	77080	chr9	35838329	35844150	-	NM_029863	protein_coding	mANLP3| Pate-A	RIKEN cDNA 9230110F15 gene
9230112D13Rik	0	0	-7.64386	-7.64386	0	78243	chr14	34511621	34522801	-	NM_030062	protein_coding	.	RIKEN cDNA 9230112D13 gene
9230112J17Rik	0.0430222	0.198377	-4.38015	-2.29777	2.08238	100504561	chr9	60523967	60545882	-	NR_040463	lncRNA	.	RIKEN cDNA 9230112J17 gene
9230114K14Rik	0.28719	0.279317	-1.77502	-1.81443	-0.0394064	414108	chr5	52190681	52197984	+	NR_015537	lncRNA	.	RIKEN cDNA 9230114K14 gene
9230116L04Rik	0.101506	0	-3.23099	-7.64386	-4.41286	321017	chr12	79088705	79103939	-	NR_110486	lncRNA	.	RIKEN cDNA 9230116L04 gene
9230116N13Rik	0.0967931	0.0706081	-3.29629	-3.72532	-0.429027	320054	chr1	136411916	136415519	-	NR_024328	lncRNA	.	RIKEN cDNA 9230116N13 gene
9230117E06Rik	0	0	-7.64386	-7.64386	0	78082	chr16	22511480	22517685	+	NR_130988	lncRNA	.	RIKEN cDNA 9230117E06 gene
9330020H09Rik	0.823671	0.827266	-0.271129	-0.264883	0.00624527	100048895	chr15	98567324	98570864	+	NR_028442	lncRNA	ENSMUSG00000075426	RIKEN cDNA 9330020H09 gene
9330102E08Rik	0.251337	0.414712	-1.96389	-1.25253	0.711358	330427	chr6	128169700	128183803	-	NR_077223	lncRNA	.	RIKEN cDNA 9330102E08 gene
9330111N05Rik	0	0	-7.64386	-7.64386	0	319983	chr13	80964074	81079857	+	NR_015587	lncRNA	.	RIKEN cDNA 9330111N05 gene
9330117O12Rik	0	0	-7.64386	-7.64386	0	328957	chr18	54611744	54639870	+	NR_045400	lncRNA	9330117O12	RIKEN cDNA 9330117O12 gene
9330133O14Rik	2.11725	1.2239	1.08559	0.297368	-0.788227	100689703	chr8	122443656	122446476	+	NR_045696	lncRNA	.	RIKEN cDNA 9330133O14 gene
9330136K24Rik	0.241892	0.156734	-2.01805	-2.62831	-0.610257	319870	chr17	21528196	21535878	-	NR_131123	lncRNA	.	RIKEN cDNA 9330136K24 gene
9330151L19Rik	2.93319	2.29943	1.55493	1.20441	-0.350518	414085	chr12	69197211	69199868	+	NR_033222	lncRNA	.	RIKEN cDNA 9330151L19 gene
9330158H04Rik	0	0	-7.64386	-7.64386	0	319472	chr6	36333138	36388234	-	NR_015589	lncRNA	.	RIKEN cDNA 9330158H04 gene
9330159F19Rik	0.0336556	0.00816046	-4.69318	-6.24765	-1.55447	212448	chr10	29211643	29230779	+	NM_001162537	protein_coding	.	RIKEN cDNA 9330159F19 gene
9330159M07Rik	0.163862	0.229981	-2.56608	-2.08938	0.476699	319673	chr9	88841798	88858870	-	NR_037983	lncRNA	1700096K11Rik| mU50hg-a	RIKEN cDNA 9330159M07 gene
9330162012Rik	0.0362616	0.0706918	-4.59906	-3.72372	0.875337	493800	chr13	24937401	24939049	+	NR_102323	lncRNA	.	cDNA RIKEN 9330162012 gene
9330162B11Rik	0	0	-7.64386	-7.64386	0	320272	chr1	188006576	188008990	-	NR_038007	lncRNA	.	RIKEN cDNA 9330162B11 gene
9330175E14Rik	0	0.10043	-7.64386	-3.24564	4.39821	320377	chr8	94433127	94435103	-	NR_015514	lncRNA	A630085K21	RIKEN cDNA 9330175E14 gene
9330175M20Rik	0	0	-7.64386	-7.64386	0	442821	chr1	51218386	51333779	-	NR_045151	lncRNA	.	RIKEN cDNA 9330175M20 gene
9330178D15Rik	0	0	-7.64386	-7.64386	0	329780	chr3	155976354	156008592	+	NR_040553	lncRNA	9330178D15	RIKEN cDNA 9330178D15 gene
9330179D12Rik	0.208937	0.0407785	-2.22474	-4.44919	-2.22444	77558	chr6	127149389	127212419	+	NR_040274	lncRNA	.	RIKEN cDNA 9330179D12 gene
9330182L06Rik	0	0	-7.64386	-7.64386	0	231014	chr5	9266193	9480717	+	NM_172706	protein_coding	Eig121l	RIKEN cDNA 9330182L06 gene
9330182O14Rik	0	0	-7.64386	-7.64386	0	328531	chr15	40134365	40150010	+	NM_001256056	protein_coding	.	RIKEN cDNA 9330182O14 gene
9330188P03Rik	3.18692	3.77937	1.67442	1.92005	0.245629	380930	chr14	105589549	105593929	+	NR_102319	lncRNA	Gm1589| mgt-6	RIKEN cDNA 9330188P03 gene
9330199G10Rik	0	0	-7.64386	-7.64386	0	319466	chr13	19462847	19504367	-	NR_131038	lncRNA	.	RIKEN cDNA 9330199G10 gene
9430007A20Rik	0	0	-7.64386	-7.64386	0	381572	chr4	144519822	144529353	+	NM_198662	protein_coding	Aadacl4| Gm1034	RIKEN cDNA 9430007A20 gene
9430014N10Rik	0	0	-7.64386	-7.64386	0	77248	chr15	93904856	93927111	-	NR_045737	lncRNA	.	RIKEN cDNA 9430014N10 gene
9430015G10Rik	16.0519	15.557	4.00512	3.95996	-0.0451659	230996	chr4	156109998	156127263	+	NM_145557	protein_coding	.	RIKEN cDNA 9430015G10 gene
9430016H08Rik	12.3917	16.5574	3.63188	4.04984	0.417956	68115	chr1	57406548	57415958	+	NM_001081181	protein_coding	AA409999| C78988	RIKEN cDNA 9430016H08 gene
9430018G01Rik	0.294135	0.239776	-1.74113	-2.03047	-0.289335	319812	chr6	43442429	43474318	+	NR_045988	lncRNA	.	RIKEN cDNA 9430018G01 gene
9430019J16Rik	0	0	-7.64386	-7.64386	0	77269	chr2	75436057	75444179	-	NR_040635	lncRNA	.	RIKEN cDNA 9430019J16 gene
9430020K01Rik	3.13444	3.80078	1.65051	1.92819	0.277685	240185	chr18	4634929	4682869	+	NM_001081963	protein_coding	1110056P05Rik| Gm328| Jcad| mKIAA1462	RIKEN cDNA 9430020K01 gene
9430021M05Rik	0	0	-7.64386	-7.64386	0	77288	chr2	162661163	162675204	+	NR_033569	lncRNA	.	RIKEN cDNA 9430021M05 gene
9430037G07Rik	0.323423	0.433722	-1.60637	-1.18862	0.417752	320692	chr9	88595325	88599243	-	NR_040766	lncRNA	.	RIKEN cDNA 9430037G07 gene
9430038I01Rik	2.83857	1.84911	1.5077	0.890727	-0.616976	77252	chr7	137375569	137410756	-	NM_029886	protein_coding	.	RIKEN cDNA 9430038I01 gene
9430041J12Rik	0.0217276	0.0211236	-5.22553	-5.2585	-0.0329766	77323	chr7	4074125	4120728	-	NR_033568	lncRNA	.	RIKEN cDNA 9430041J12 gene
9430060I03Rik	0.218503	0.0911965	-2.16163	-3.37787	-1.21624	100037260	chr1	92933543	92950590	-	NR_015525	lncRNA	.	RIKEN cDNA 9430060I03 gene
9430065F17Rik	0.0522446	0	-4.12672	-7.64386	-3.51714	77857	chr13	67553202	67570892	+	NR_131100	lncRNA	E130110G22Rik	RIKEN cDNA 9430065F17 gene
9430069I07Rik	0	0	-7.64386	-7.64386	0	77358	chr15	34349051	34357872	-	NM_001256161	protein_coding	.	RIKEN cDNA 9430069I07 gene
9430076C15Rik	0.0324172	0.0472271	-4.74015	-4.25906	0.481097	.	chr6	53287295	53397216	+	NR_015553	.	.	.
9430078K24Rik	0.0472779	0.0923516	-4.25766	-3.36065	0.897004	77290	chr12	79917019	79936264	-	NR_131073	lncRNA	.	RIKEN cDNA 9430078K24 gene
9430083A17Rik	0.0657427	0.0319272	-3.82127	-4.75917	-0.937897	77428	chr13	51097738	51100727	-	NR_029463	lncRNA	.	RIKEN cDNA 9430083A17 gene
9430091E24Rik	0.273525	0.32278	-1.84412	-1.6092	0.234921	434350	chr8	111127444	111145498	-	NR_040363	lncRNA	.	RIKEN cDNA 9430091E24 gene
9530002B09Rik	0	0	-7.64386	-7.64386	0	77432	chr4	122689259	122705135	+	NM_023865	protein_coding	Aump| RP23-332L16.1| Vpp1| Vppl	RIKEN cDNA 9530002B09 gene
9530003J23Rik	0	0	-7.64386	-7.64386	0	77397	chr10	117233753	117238681	-	NM_029906	protein_coding	Lyzf1	RIKEN cDNA 9530003J23 gene
9530014B07Rik	0	0	-7.64386	-7.64386	0	77398	chr13	53635892	53639201	-	NR_131079	lncRNA	.	RIKEN cDNA 9530014B07 gene
9530020I12Rik	0	0	-7.64386	-7.64386	0	77442	chr12	11185993	11204502	-	NR_131085	lncRNA	.	RIKEN cDNA 9530020I12 gene
9530026F06Rik	0	0	-7.64386	-7.64386	0	77341	chr1	61378432	61395904	+	NR_040483	lncRNA	.	RIKEN cDNA 9530026F06 gene
9530026P05Rik	0.174022	0.11353	-2.48179	-3.07668	-0.594885	330385	chr6	92940582	93111749	+	NR_015530	lncRNA	B430306B02	RIKEN cDNA 9530026P05 gene
9530027J09Rik	4.92284	5.45726	2.30096	2.4495	0.148543	100500713	chrX	48276792	48285426	-	NR_045916	lncRNA	.	RIKEN cDNA 9530027J09 gene
9530036O11Rik	0	0	-7.64386	-7.64386	0	654796	chr5	28466984	28719209	+	NR_015562	lncRNA	.	RIKEN cDNA 9530036O11Rik
9530051G07Rik	0.0434938	0.0211011	-4.36606	-5.25975	-0.89369	319781	chrX	153037629	153072915	+	NR_040272	lncRNA	.	RIKEN cDNA 9530051G07 gene
9530052E02Rik	0	0.119824	-7.64386	-3.00203	4.64182	619321	chr8	11007850	11054541	+	NR_046017	lncRNA	.	RIKEN cDNA 9530052E02 gene
9530053A07Rik	0.142315	0.132218	-2.76302	-2.86546	-0.102435	319482	chr7	28129466	28164811	+	NM_001164655	protein_coding	FCGBP	RIKEN cDNA 9530053A07 gene
9530059O14Rik	0	0	-7.64386	-7.64386	0	319626	chr9	122572501	122580647	+	NR_015610	lncRNA	.	RIKEN cDNA 9530059O14 gene
9530062K07Rik	0.553391	0.388294	-0.840652	-1.34632	-0.505668	78739	chr6	116199410	116207993	-	NR_131013	lncRNA	.	RIKEN cDNA 9530062K07 gene
9530068E07Rik	111.228	88.6922	6.79744	6.47082	-0.326624	213673	chr11	52396428	52408723	+	NM_153117	protein_coding	C85061| Kct2	RIKEN cDNA 9530068E07 gene
9530077C05Rik	0.891252	0.912363	-0.158024	-0.124435	0.0335883	68283	chr9	22411577	22444679	+	NM_026739	protein_coding	1110003N12Rik| Kiaa0895| mKIAA0895	RIKEN cDNA 9530077C05 gene
9530080O11Rik	0.0718963	0.140154	-3.70094	-2.78434	0.916598	319247	chr4	95959711	95967655	-	NR_045777	lncRNA	.	RIKEN cDNA 9530080O11 gene
9530082P21Rik	5.61897	7.11016	2.49159	2.8309	0.339307	638247	chr17	23749236	23754065	+	NR_015472	lncRNA	E030034P13Rik	RIKEN cDNA 9530082P21 gene
9530091C08Rik	0.123644	0.0799101	-2.95854	-3.55792	-0.599376	320440	chr9	68765346	68773322	+	NR_033299	lncRNA	.	RIKEN cDNA 9530091C08 gene
9630001P10Rik	0	0	-7.64386	-7.64386	0	319251	chr5	45639275	45645469	+	NR_102378	lncRNA	.	RIKEN cDNA 9630001P10 gene
9630013A20Rik	0	0.02406	-7.64386	-5.10482	2.53903	319903	chr14	84458838	84476424	-	NR_015539	lncRNA	.	RIKEN cDNA 9630013A20 gene
9630013K17Rik	0.158544	0.206673	-2.61225	-2.24009	0.372158	78883	chr11	63964226	63968040	+	NR_131111	lncRNA	.	RIKEN cDNA 9630013K17 gene
9630028B13Rik	0.0142989	0.0277656	-5.69534	-4.93167	0.763663	319562	chr1	185429357	185441819	-	NR_038006	lncRNA	.	RIKEN cDNA 9630028B13 gene
9630028H03Rik	0	0	-7.64386	-7.64386	0	320684	chr2	135580530	135583220	-	NR_015544	lncRNA	.	RIKEN cDNA 9630028H03 gene
9630028I04Rik	0	0	-7.64386	-7.64386	0	319720	chr17	27235075	27248066	-	NR_131118	lncRNA	.	RIKEN cDNA 9630028I04 gene
9830107B12Rik	0.0406394	0.026298	-4.45358	-4.99779	-0.544209	328829	chr17	48125605	48146307	-	NM_001177897	protein_coding	Trem5	RIKEN cDNA 9830107B12 gene
9830132P13Rik	0.0344718	0	-4.66303	-7.64386	-2.98082	329753	chr3	127916171	127955220	+	NR_040552	lncRNA	9830132P13	RIKEN cDNA 9830132P13 gene
9830147E19Rik	2.6377	2.23545	1.40201	1.16379	-0.238224	208111	chr7	42609526	42642604	-	NM_001242388	protein_coding	C330019L16Rik	RIKEN cDNA 9830147E19 gene
9830166K06Rik	0	0	-7.64386	-7.64386	0	402757	chr19	8651796	8663335	-	NR_045314	lncRNA	.	RIKEN cDNA 9830166K06 gene
9930012K11Rik	4.24446	2.80502	2.08728	1.49058	-0.596699	268759	chr14	70154405	70159502	-	NM_001004155	protein_coding	.	RIKEN cDNA 9930012K11 gene
9930014A18Rik	3.19653	4.74124	1.67876	2.24679	0.568024	320469	chr15	60822965	60831400	+	NR_030696	lncRNA	.	RIKEN cDNA 9930014A18 gene
9930021J03Rik	7.26683	6.97097	2.86232	2.80239	-0.0599246	240613	chr19	29714402	29806009	-	NM_172836	protein_coding	ENSMUSG00000048936| Gm9832| mKIAA2026	RIKEN cDNA 9930021J03 gene
9930104L06Rik	4.90014	5.50689	2.29429	2.46255	0.168253	194268	chr4	124937048	124944661	+	NM_177573	protein_coding	.	RIKEN cDNA 9930104L06 gene
9930111H07Rik	0	0	-7.64386	-7.64386	0	77762	chr1	85775271	85784694	+	NR_108086	lncRNA	.	RIKEN cDNA 9930111H07 gene
9930111J21Rik1	0.732005	1.20802	-0.440254	0.278603	0.718857	667214	chr11	48946150	48979381	-	NM_001114679	protein_coding	9930111J21Rik| Iigp	RIKEN cDNA 9930111J21 gene 1
9930111J21Rik2	0	0.080981	-7.64386	-3.53984	4.10402	245240	chr11	48965817	49051242	-	NM_173434	protein_coding	9930111J21Rik| Irgb5| OTTMUSG00000005540| RP23-54N20.1	RIKEN cDNA 9930111J21 gene 2
A130010J15Rik	1.77378	2.19538	0.830888	1.13775	0.306865	319266	chr1	193173469	193177832	+	NM_001160360	protein_coding	.	RIKEN cDNA A130010J15 gene
A130077B15Rik	2.16963	1.91854	1.12077	0.943764	-0.177006	319272	chr10	122565023	122569891	-	NR_040616	lncRNA	.	RIKEN cDNA A130077B15 gene
A1bg	0	0	-7.64386	-7.64386	0	117586	chr15	60917589	60921270	-	NM_001081067	protein_coding	C44	alpha-1-B glycoprotein
A1cf	0	0	-7.64386	-7.64386	0	69865	chr19	31868761	31949406	+	NM_001081074	protein_coding	1810073H04Rik| Acf| ACF64| ACF65| ASP	APOBEC1 complementation factor
A230001M10Rik	0	0	-7.64386	-7.64386	0	319951	chr3	102262405	102288771	+	NR_040391	lncRNA	.	RIKEN cDNA A230001M10 gene
A230009B12Rik	0.428122	0.100423	-1.20715	-3.24574	-2.03858	319750	chr17	10456216	10493057	+	NR_077237	lncRNA	.	RIKEN cDNA A230009B12 gene
A230020J21Rik	2.88582	2.99596	1.53148	1.58542	0.0539453	100125339	chr1	191025351	191029781	+	NR_027298	lncRNA	ENSMUSG00000066596	RIKEN cDNA A230020J21 gene
A230028O05Rik	0.0707495	0.0171832	-3.72262	-5.49439	-1.77177	319487	chr16	25059639	25069058	+	NR_040374	lncRNA	.	RIKEN cDNA A230028O05 gene
A230046K03Rik	21.1612	20.3655	4.40369	4.34841	-0.0552809	319277	chr10	83543941	83596473	+	NM_001033375	protein_coding	AA589518| Kiaa1033| mKIAA1033	RIKEN cDNA A230046K03 gene
A230050P20Rik	0.0619644	0.0905134	-3.90046	-3.38815	0.512309	319278	chr9	20868642	20874307	+	NM_175687	protein_coding	RyDEN	RIKEN cDNA A230050P20 gene
A230056J06Rik	0	0	-7.64386	-7.64386	0	319469	chr13	59580176	59585223	-	NR_045633	lncRNA	.	RIKEN cDNA A230056J06 gene
A230056P14Rik	0.0763346	0.0744326	-3.61999	-3.65412	-0.034138	320845	chr7	55962531	55980096	+	NR_015495	lncRNA	OTTMUSG00000027345	RIKEN cDNA A230056P14 gene
A230057D06Rik	0.0254501	0.0247592	-5.03741	-5.07052	-0.0331112	319893	chr7	61705850	61927574	-	NR_015533	lncRNA	.	RIKEN cDNA A230057D06 gene
A230065H16Rik	0.101493	0	-3.23117	-7.64386	-4.41269	380787	chr12	111406809	111412077	+	NM_001101503	protein_coding	Gm898| Lbh2	RIKEN cDNA A230065H16 gene
A230070E04Rik	0.0834527	0.108296	-3.49895	-3.14183	0.357119	100043072	chr14	68123752	68131371	+	NR_045897	lncRNA	100043072| Gm4210	RIKEN cDNA A230070E04 gene
A230072C01Rik	1.28367	1.45943	0.365883	0.550339	0.184456	320742	chrX	20961676	20987349	+	NR_027445	lncRNA	.	RIKEN cDNA A230072C01 gene
A230072E10Rik	0.0445102	0.0144064	-4.33613	-5.68732	-1.35119	331547	chrX	151313335	151341879	-	NR_015600	lncRNA	C130073P14| Gm15139| OTTMUSG00000019231	RIKEN cDNA A230072E10 gene
A230077H06Rik	0	0	-7.64386	-7.64386	0	320210	chr7	40849153	40898324	-	NR_040329	lncRNA	.	RIKEN cDNA A230077H06 gene
A230103J11Rik	1.56806	1.10911	0.653574	0.155892	-0.497682	320466	chr8	85053160	85060460	-	NR_110582	lncRNA	.	RIKEN cDNA A230103J11 gene
A230108P19Rik	0	0.019386	-7.64386	-5.3578	2.28605	320132	chr2	6193251	6321611	+	NR_040333	lncRNA	.	RIKEN cDNA A230108P19 gene
A2m	0	0	-7.64386	-7.64386	0	232345	chr6	121636173	121679238	+	NM_175628	protein_coding	A2mp	alpha-2-macroglobulin
A330009N23Rik	0.649934	0.62335	-0.610579	-0.67036	-0.0597811	380977	chr15	101221191	101225186	-	NR_045328	lncRNA	.	RIKEN cDNA A330009N23 gene
A330015K06Rik	0.0919408	0.0223489	-3.36675	-5.19237	-1.82562	102637797	chr3	65133059	65302685	-	NR_126080	lncRNA	.	RIKEN cDNA A330015K06 gene
A330023F24Rik	0.119225	0.338053	-3.00897	-1.5435	1.46548	320977	chr1	195017399	195037908	+	NR_015566	lncRNA	C030002C11Rik	RIKEN cDNA A330023F24 gene
A330032B11Rik	0.026715	0.103975	-4.97869	-3.19793	1.78076	319931	chr19	37173843	37196541	+	NR_045329	lncRNA	.	RIKEN cDNA A330032B11 gene
A330033J07Rik	0	0	-7.64386	-7.64386	0	320614	chr13	48044231	48262623	-	NR_102303	lncRNA	.	RIKEN cDNA A330033J07 gene
A330035P11Rik	0.200931	0.195223	-2.27977	-2.32032	-0.0405533	319727	chr14	122097939	122106974	-	NR_015586	lncRNA	.	RIKEN cDNA A330035P11 gene
A330040F15Rik	0.711915	0.993954	-0.480126	-0.00150985	0.478616	74333	chr19	12585868	12596566	-	NR_015503	lncRNA	.	RIKEN cDNA A330040F15 gene
A330041J22Rik	0	0.0272239	-7.64386	-4.95573	2.68813	319556	chr9	86695442	86701253	+	NR_045835	lncRNA	.	RIKEN cDNA A330041J22 gene
A330048O09Rik	0	0	-7.64386	-7.64386	0	320315	chr13	48272418	48273884	-	NR_045162	lncRNA	.	RIKEN cDNA A330048O09 gene
A330049N07Rik	0	0.0749054	-7.64386	-3.64556	3.99829	327768	chr10	72973303	73086705	-	NR_040646	lncRNA	.	RIKEN cDNA A330049N07 gene
A330050F15Rik	0	0	-7.64386	-7.64386	0	.	chr17	69439326	69489233	+	NM_001145192	.	.	.
A330069E16Rik	0.934084	0.719341	-0.0906739	-0.465259	-0.374585	606735	chr2	91237146	91238357	+	NR_015464	lncRNA	.	RIKEN cDNA A330069E16 gene
A330070K13Rik	0	0	-7.64386	-7.64386	0	381673	chr5	130378851	130384631	-	NM_198665	protein_coding	Gm1051	RIKEN cDNA A330070K13 gene
A330074K22Rik	0.821757	0.87659	-0.274465	-0.18182	0.0926445	434353	chr8	120204434	120228230	-	NR_110496	lncRNA	.	RIKEN cDNA A330074K22 gene
A330076C08Rik	0	0	-7.64386	-7.64386	0	100503592	chr13	44193589	44216487	-	NR_045088	lncRNA	.	RIKEN cDNA A330076C08 gene
A330076H08Rik	0.0280736	0.163946	-4.91818	-2.56537	2.35281	320026	chr7	61943901	61982303	-	NR_015599	lncRNA	Mirh1	RIKEN cDNA A330076H08 gene
A330093E20Rik	0.0207897	0	-5.27706	-7.64386	-2.36679	107003	chr18	45683487	46045260	-	NR_040342	lncRNA	AU043608	RIKEN cDNA A330093E20 gene
A330102I10Rik	0	0	-7.64386	-7.64386	0	77920	chr13	29014414	29040336	+	NR_045077	lncRNA	.	RIKEN cDNA A330102I10 gene
A3galt2	0.143707	0.15348	-2.74946	-2.65763	0.0918282	215493	chr4	128759258	128769298	+	NM_001009819	protein_coding	Gm433| iGb3| iGb3S	alpha 1,3-galactosyltransferase 2 (isoglobotriaosylceramide synthase)
A430005L14Rik	9.50249	14.9107	3.24906	3.89876	0.649695	97159	chr4	153957237	153961924	+	NM_001163019	protein_coding	C79672	RIKEN cDNA A430005L14 gene
A430033K04Rik	2.99226	3.02695	1.58364	1.60025	0.0166017	243308	chr5	138622859	138648905	+	NM_183025	protein_coding	C86988	RIKEN cDNA A430033K04 gene
A430035B10Rik	0.0529012	0.0257371	-4.11026	-5.02388	-0.913612	320312	chr6	8507059	8509161	-	NR_040452	lncRNA	2810488G03Rik	RIKEN cDNA A430035B10 gene
A430046D13Rik	0.527616	0.825799	-0.908832	-0.267429	0.641404	654440	chr10	128499247	128504242	+	NR_131151	lncRNA	.	Riken cDNA A430046D13 gene
A430078G23Rik	1.49153	1.35215	0.581621	0.44058	-0.141041	319493	chr8	3353415	3390299	+	NM_001033378	protein_coding	.	RIKEN cDNA A430078G23 gene
A430078I02Rik	0.0601792	0.0389938	-3.93944	-4.50656	-0.567111	320486	chr6	86470277	86480830	-	NR_131126	lncRNA	T25621	RIKEN cDNA A430078I02 gene
A430085M09Rik	0	0	-7.64386	-7.64386	0	623726	chr4	78594047	78597484	+	NR_131142	lncRNA	EG623726	RIKEN cDNA A430085M09 gene
A430088P11Rik	0.59592	0.791671	-0.734755	-0.327944	0.406811	106059	chr15	80691025	80697610	-	NR_045310	lncRNA	.	RIKEN cDNA A430088P11 gene
A430089I19Rik	0.0557368	0.0271236	-4.04129	-4.96022	-0.918937	331195	chr5	94302519	94955288	-	NM_177913	protein_coding	Gm16522	RIKEN cDNA A430089I19 gene
A430090L17Rik	0	0.0127594	-7.64386	-5.81527	1.82858	319803	chr13	114124348	114151592	-	NR_045836	lncRNA	.	RIKEN cDNA A430090L17 gene
A430093F15Rik	0.0239701	0.0233131	-5.10929	-5.14239	-0.0330949	403202	chr19	10740947	10786043	+	NR_027805	lncRNA	Gm674	RIKEN cDNA A430093F15 gene
A430105I19Rik	14.2338	12.4019	3.83176	3.63307	-0.198685	214239	chr2	118754145	118762661	-	NM_001001982	protein_coding	Gm353	RIKEN cDNA A430105I19 gene
A4galt	0.266876	0.306771	-1.87898	-1.68144	0.197538	239559	chr15	83226722	83251774	-	NM_001004150	protein_coding	.	alpha 1,4-galactosyltransferase
A4gnt	0.017937	0	-5.44618	-7.64386	-2.19768	333424	chr9	99612502	99622367	+	NM_001077424	protein_coding	Alpha4gnt| AV080780| Gm798	alpha-1,4-N-acetylglucosaminyltransferase
A530006G24Rik	0	0	-7.64386	-7.64386	0	381384	chr2	147710693	147717632	+	NR_046014	lncRNA	Gm1003	RIKEN cDNA A530006G24 gene
A530013C23Rik	0.0475822	0.138845	-4.24928	-2.79741	1.45187	329562	chr2	167690759	167697413	+	NR_110334	lncRNA	.	RIKEN cDNA A530013C23 gene
A530016L24Rik	0.73438	0.53062	-0.435612	-0.900718	-0.465106	319942	chr12	112489448	112499927	+	NM_177039	protein_coding	Nrac	RIKEN cDNA A530016L24 gene
A530032D15Rik	0.0294468	0.028668	-4.85949	-4.89248	-0.0329919	381287	chr1	85088139	85109853	-	NM_213615	protein_coding	Gm1888	RIKEN cDNA A530032D15Rik gene
A530046M15Rik	0	0.10043	-7.64386	-3.24564	4.39821	328190	chr13	15807243	15827537	+	NR_046131	lncRNA	A530046M15	RIKEN cDNA A530046M15 gene
A530050N04Rik	0	0	-7.64386	-7.64386	0	442846	chr18	61470225	61484607	-	NR_045419	lncRNA	.	RIKEN cDNA A530050N04 gene
A530053G22Rik	0	0	-7.64386	-7.64386	0	208079	chr6	60279043	60403707	-	NR_015565	lncRNA	.	RIKEN cDNA A530053G22 gene
A530058N18Rik	0	0	-7.64386	-7.64386	0	320846	chr2	114013565	114032292	+	NR_028423	lncRNA	.	RIKEN cDNA A530058N18 gene
A530064D06Rik	0.181827	0.0885214	-2.42023	-3.41856	-0.998335	328830	chr17	48151896	48167257	-	NM_178796	protein_coding	pdctrem| Trem4	RIKEN cDNA A530064D06 gene
A530065N20Rik	0	0	-7.64386	-7.64386	0	328263	chr13	60029711	60116669	+	NR_046142	lncRNA	A530065N20	RIKEN cDNA A530046M15 gene
A530072M11Rik	0.0278007	0.0270574	-4.93013	-4.9632	-0.0330692	100415915	chr4	16164110	16266225	+	NR_045765	lncRNA	.	RIKEN cDNA gene A530072M11
A530088E08Rik	0	0	-7.64386	-7.64386	0	664702	chr17	32403014	32404808	+	NR_029458	lncRNA	.	RIKEN cDNA A530088E08 gene
A530099J19Rik	0	0	-7.64386	-7.64386	0	319293	chr13	19727417	19732951	-	NM_175688	protein_coding	.	RIKEN cDNA A530099J19 gene
A630001G21Rik	0	0	-7.64386	-7.64386	0	319997	chr1	85717083	85736606	-	NM_177055	protein_coding	.	RIKEN cDNA A630001G21 gene
A630010A05Rik	0	0	-7.64386	-7.64386	0	545280	chr16	14562317	14621284	+	NR_033556	lncRNA	RP24-255L12.1	RIKEN cDNA A630010A05 gene
A630012P03Rik	0	0	-7.64386	-7.64386	0	100504594	chrX	52575843	52619047	+	NR_045367	lncRNA	.	RIKEN cDNA A630012P03 gene
A630019I02Rik	0	0	-7.64386	-7.64386	0	408254	chr13	93094833	93098968	+	NR_046182	lncRNA	.	RIKEN cDNA A630019I02 gene
A630020A06	0.20673	0.280975	-2.2397	-1.80604	0.433663	328489	chr15	3996039	4015858	+	NR_045740	lncRNA	.	uncharacterized A630020A06
A630023A22Rik	0.243421	0.316612	-2.00914	-1.63661	0.372534	105518	chr14	34051130	34102754	-	NM_001251843	protein_coding	AI461879	RIKEN cDNA A630023A22 gene
A630023P12Rik	0	0	-7.64386	-7.64386	0	231603	chr5	110514923	110525979	+	NR_102290	lncRNA	.	RIKEN cDNA A630023P12 gene
A630033H20Rik	0.854514	0.815909	-0.218407	-0.284706	-0.0662988	213438	chrX	107148927	107173661	+	NM_001122596	protein_coding	AI662791| P2ry10	RIKEN cDNA A630033H20 gene
A630066F11Rik	0.830484	0.469296	-0.259316	-1.07614	-0.816824	320642	chr10	7663371	7664623	+	NR_030698	lncRNA	.	RIKEN cDNA A630066F11 gene
A630072M18Rik	1.00232	0.912496	0.0105221	-0.124226	-0.134748	320770	chr5	20950989	20956398	+	NR_030699	lncRNA	Aptr	RIKEN cDNA A630072M18 gene
A630073D07Rik	0	0	-7.64386	-7.64386	0	381819	chr6	132625111	132627511	-	NM_001142969	protein_coding	Gm1688	RIKEN cDNA A630073D07 gene
A630075F10Rik	0	0	-7.64386	-7.64386	0	100043910	chr2	170061240	170070778	-	NR_033634	lncRNA	100043910| 4831414D02| Gm4722	RIKEN cDNA A630075F10 gene
A630076J17Rik	0	0	-7.64386	-7.64386	0	319929	chr3	107230614	107234031	+	NM_001256174	protein_coding	.	RIKEN cDNA A630076J17 gene
A630077J23Rik	0	0.11934	-7.64386	-3.00764	4.63622	319973	chr4	43751859	43759464	+	NR_040667	lncRNA	.	RIKEN cDNA A630077J23 gene
A630089N07Rik	4.46891	2.35809	2.16154	1.24067	-0.920862	320586	chr16	98062512	98082439	-	NR_015491	lncRNA	.	RIKEN cDNA A630089N07 gene
A630095E13Rik	3.43537	4.81738	1.78256	2.26975	0.487182	235973	chr9	36635754	36638602	-	NM_001033325	protein_coding	Gm191| Sslp-1| Sslp1	RIKEN cDNA A630095E13 gene
A630095N17Rik	0.103553	0.204354	-3.20353	-2.25598	0.947545	381272	chr1	75220095	75232093	-	NM_001243091	protein_coding	Gm1624	RIKEN cDNA A630095N17 gene
A730004F24Rik	0	0	-7.64386	-7.64386	0	320449	chr1	186511838	186558681	-	NR_131158	lncRNA	.	RIKEN cDNA A730004F24 gene
A730006G06Rik	0	0	-7.64386	-7.64386	0	320638	chr17	48064789	48090378	-	NR_110485	lncRNA	.	RIKEN cDNA A730006G06 gene
A730008H23Rik	14.6229	13.4858	3.87065	3.7539	-0.116747	.	chr1	88264828	88277557	-	NM_172505	.	.	.
A730017C20Rik	0	0	-7.64386	-7.64386	0	225583	chr18	59062381	59076960	+	NR_033765	protein_coding	.	RIKEN cDNA A730017C20 gene
A730017L22Rik	1.03372	0.943351	0.0548068	-0.076507	-0.131314	613258	chr2	130872541	130906396	-	NR_015523	lncRNA	.	RIKEN cDNA A730017L22 gene
A730018C14Rik	0	0	-7.64386	-7.64386	0	100504733	chr12	112411023	112423198	-	NR_036459	lncRNA	.	RIKEN cDNA A730018C14 gene
A730020E08Rik	0.0943523	0.06126	-3.3313	-3.91572	-0.584415	100504262	chr6	61175604	61180810	-	NR_040287	lncRNA	.	RIKEN cDNA A730020E08 gene
A730020M07Rik	0.401202	0.307899	-1.29973	-1.67623	-0.3765	100503044	chr3	121634936	121646453	-	NR_036456	lncRNA	.	RIKEN cDNA A730020M07 gene
A730036I17Rik	0	0	-7.64386	-7.64386	0	329513	chr2	129218969	129235606	+	NR_045838	lncRNA	.	RIKEN cDNA A730036I17 gene
A730043L09Rik	0	0	-7.64386	-7.64386	0	330958	chr9	62242596	62244100	-	NR_040769	lncRNA	A730043L09	RIKEN cDNA A730043L09 gene
A730046J19Rik	0	0	-7.64386	-7.64386	0	319764	chrX	144153695	144166274	+	NR_040271	lncRNA	.	RIKEN cDNA A730046J19 gene
A730056A06Rik	0	0	-7.64386	-7.64386	0	319783	chr7	73313806	73375774	-	NR_040325	lncRNA	C76391	RIKEN cDNA A730056A06 gene
A730082K24Rik	0	0	-7.64386	-7.64386	0	101786	chr7	114948650	114983967	+	NR_040317	lncRNA	AU044236	RIKEN cDNA A730082K24 gene
A730085K08Rik	0	0	-7.64386	-7.64386	0	654800	chr9	122382022	122398801	-	NR_045967	lncRNA	.	RIKEN cDNA A730085K08 gene
A730090H04Rik	1.00504	0.978807	0.0144124	-0.0235528	-0.0379652	.	chr11	95145053	95159047	+	NR_040279	.	.	.
A730090N16Rik	0.272183	0.151668	-1.85109	-2.67422	-0.823128	319798	chr3	65324020	65349429	-	NR_040390	lncRNA	.	RIKEN cDNA A730090N16 gene
A830009L08Rik	0	0	-7.64386	-7.64386	0	320297	chr13	91368990	91388085	-	NR_045161	lncRNA	.	RIKEN cDNA A830009L08 gene
A830010M20Rik	0.957001	0.89407	-0.0558897	-0.153495	-0.0976049	231570	chr5	107497745	107512556	+	NM_001007574	protein_coding	AI849226| Kiaa1107| mKIAA1107	RIKEN cDNA A830010M20 gene
A830011K09Rik	0	0	-7.64386	-7.64386	0	319702	chr6	138423105	138429592	+	NR_126072	lncRNA	.	RIKEN cDNA A830011K09 gene
A830018L16Rik	0	0	-7.64386	-7.64386	0	320492	chr1	11414105	11975902	+	NM_001160369	protein_coding	.	RIKEN cDNA A830018L16 gene
A830019L24Rik	0	0	-7.64386	-7.64386	0	320072	chr3	143243055	143257996	+	NR_040551	lncRNA	.	RIKEN cDNA A830019L24 gene
A830052D11Rik	0	0.0967899	-7.64386	-3.29633	4.34752	402767	chr18	32359057	32378284	-	NR_045403	lncRNA	.	RIKEN cDNA A830052D11 gene
A830080D01Rik	7.39921	8.96965	2.88835	3.16586	0.27751	382252	chrX	159532668	159593081	+	NM_001033472	protein_coding	2310067E24Rik| Gm1146	RIKEN cDNA A830080D01 gene
A830082K12Rik	0.850202	0.932549	-0.225663	-0.093034	0.132629	320174	chr13	78198017	78236564	+	NR_045195	lncRNA	.	RIKEN cDNA A830082K12 gene
A830082N09Rik	0.179804	0.0987771	-2.43593	-3.26844	-0.832508	414093	chr10	33987216	33995055	-	NR_015526	lncRNA	Gm17567	RIKEN cDNA A830082N09 gene
A930001A20Rik	0	0	-7.64386	-7.64386	0	77127	chr3	14971201	15002727	+	NR_040550	lncRNA	.	RIKEN cDNA A930001A20 gene
A930001C03Rik	0.387325	0.314184	-1.34988	-1.64754	-0.297661	319314	chr19	4439323	4448325	+	NR_045990	lncRNA	.	RIKEN cDNA A930001C03 gene
A930002C04Rik	0	0	-7.64386	-7.64386	0	319467	chr13	47143940	47148670	-	NR_126083	lncRNA	.	RIKEN cDNA A930002C04 gene
A930003A15Rik	0	0	-7.64386	-7.64386	0	68162	chr16	19876568	19884274	-	NR_027896	lncRNA	AI853191	RIKEN cDNA A930003A15 gene
A930003O13Rik	0	0	-7.64386	-7.64386	0	330052	chr5	22738911	22746884	-	NR_027362	lncRNA	.	RIKEN cDNA A930003O13 gene
A930004D18Rik	3.68296	2.42838	1.88282	1.28296	-0.599861	77940	chr2	18025189	18037741	-	NR_028376	lncRNA	AU022051	RIKEN cDNA A930004D18 gene
A930005H10Rik	2.48272	2.21344	1.31482	1.14955	-0.165279	68161	chr3	115881579	115888130	-	NR_027894	lncRNA	.	RIKEN cDNA A930005H10 gene
A930006I01Rik	0.0678574	0.0219939	-3.77878	-5.21122	-1.43244	319854	chr2	103338601	103372764	-	NR_040332	lncRNA	.	RIKEN cDNA A930006I01 gene
A930006K02Rik	0.64019	0.314494	-0.632204	-1.64614	-1.01394	100503120	chr16	91465104	91470123	+	NR_077219	lncRNA	.	RIKEN cDNA A930006K02 gene
A930007I19Rik	0	0.0210733	-7.64386	-5.26128	2.38257	77779	chr19	29503663	29521987	-	NR_015567	lncRNA	.	RIKEN cDNA A930007I19 gene
A930009A15Rik	0.0571381	0	-4.00838	-7.64386	-3.63548	77798	chr10	115569986	115582454	+	NM_029982	protein_coding	.	RIKEN cDNA A930009A15 gene
A930011G23Rik	0	0	-7.64386	-7.64386	0	319818	chr5	99297244	99729060	-	NR_030692	lncRNA	.	RIKEN cDNA A930011G23 gene
A930012L18Rik	0.848159	0.597764	-0.229113	-0.730335	-0.501221	626275	chr18	44661665	44676271	+	NR_026853	lncRNA	.	RIKEN cDNA A930012L18 gene
A930013F10Rik	1.69016	1.56271	0.761421	0.648659	-0.112763	68074	chr8	22634384	22636809	-	NR_027886	lncRNA	.	RIKEN cDNA A930013F10 gene
A930015D03Rik	1.23502	2.72876	0.310363	1.45089	1.14052	77810	chr17	35994504	36038174	+	NR_015618	lncRNA	.	RIKEN cDNA A930015D03 gene
A930016O22Rik	0.0427025	0.103785	-4.38979	-3.20045	1.18934	100503495	chr7	19417466	19421417	-	NR_073015	lncRNA	.	RIKEN cDNA A930016O22 gene
A930017M01Rik	0.0145536	0	-5.67642	-7.64386	-1.96743	239410	chr15	44881394	44884743	+	NR_033609	misc_RNA	Gm305	RIKEN cDNA A930017M01 gene
A930018P22Rik	0	0	-7.64386	-7.64386	0	68243	chr2	104122769	104124746	+	NM_026634	protein_coding	.	RIKEN cDNA A930018P22 gene
A930019D19Rik	0	0.0595899	-7.64386	-3.95255	3.69131	77806	chr2	146259286	146267160	+	NR_040619	lncRNA	.	RIKEN cDNA A930019D19 gene
A930024E05Rik	0.434256	1.05649	-1.18687	0.0860908	1.27296	109202	chr5	122989354	122998341	+	NR_045820	lncRNA	.	RIKEN cDNA A930024E05 gene
A930031H19Rik	0	0	-7.64386	-7.64386	0	77835	chr4	131000832	131010474	-	NR_130167	lncRNA	A930004I12Rik	RIKEN cDNA A930031H19 gene
A930041C12Rik	0.552483	0	-0.843	-7.64386	-6.80086	78443	chr5	107630250	107633850	-	NR_046195	lncRNA	.	RIKEN cDNA A930041C12 gene
AA387883	0	0	-7.64386	-7.64386	0	100043450	chr19	52923181	52926931	+	NR_030678	lncRNA	100043450	expressed sequence AA387883
AA388235	0.262462	0.20622	-1.90259	-2.24318	-0.340587	433100	chr17	33981492	33985358	+	NR_033305	lncRNA	.	expressed sequence AA388235
AA413626	0.457059	0.689747	-1.11385	-0.52544	0.588411	100359413	chr11	4918516	4918918	+	NR_102683	misc_RNA	.	expressed sequence AA413626
AA414768	6.69365	14.8043	2.74387	3.88843	1.14456	245350	chrX	12936873	12938541	+	NM_001272033	protein_coding	OTTMUSG00000017000	expressed sequence AA414768
AA415398	0.161886	0.157534	-2.58307	-2.62119	-0.0381214	433752	chr4	119530315	119538769	-	NM_001004178	protein_coding	.	expressed sequence AA415398
AA465934	44.7133	46.5859	5.48279	5.54198	0.0591829	613254	chr11	83291699	83294637	+	NR_028363	lncRNA	.	expressed sequence AA465934
AA467197	5.06231	9.26465	2.34122	3.21251	0.871295	433470	chr2	122637887	122641076	+	NM_001004174	protein_coding	mir-147| Nmes1	expressed sequence AA467197
AA474331	2.38818	1.48594	1.25893	0.576222	-0.682707	.	chr10	39892760	39899238	-	NR_033628	.	.	.
AA536875	0	0	-7.64386	-7.64386	0	380934	chr14	123168503	123176176	+	NR_045145	lncRNA	Gm1591	expressed sequence AA536875
AA543186	0.153559	0.269158	-2.65691	-1.86692	0.789988	100272219	chr2	25327450	25332571	-	NR_027448	lncRNA	.	expressed sequence AA543186
AA543401	0	0	-7.64386	-7.64386	0	100417434	chr9	107192807	107194061	+	NR_102273	misc_RNA	Mycs-like	cDNA sequence, AA543401
AA545190	0	0	-7.64386	-7.64386	0	57866	chr6	10971468	10974378	-	NR_033776	lncRNA	.	EST AA545190
AA619741	0	0	-7.64386	-7.64386	0	241051	chr1	34633535	34636210	-	NR_033627	misc_RNA	.	expressed sequence AA619741
AA792892	0.181966	0.0888336	-2.41915	-3.41375	-0.994599	100554	chr5	94377340	94384334	+	NM_178894	protein_coding	.	expressed sequence AA792892
AA986860	7.56692	7.39955	2.92066	2.88841	-0.0322471	212439	chr1	130731976	130744622	+	NM_177604	protein_coding	E030025M07| Sarg	expressed sequence AA986860
AB124611	0.0452622	0.13258	-4.31438	-2.86166	1.45273	382062	chr9	21526177	21545331	+	NM_206536	protein_coding	Gm1706	cDNA sequence AB124611
AF067061	0.203424	0.731213	-2.26241	-0.441805	1.8206	236546	chr13	120263114	120264517	+	NM_199060	protein_coding	.	cDNA sequence AF067061
AF067063	0.134618	0.395874	-2.84044	-1.31878	1.52166	380878	chr13	119827961	119830217	-	NM_001001449	protein_coding	.	cDNA sequence AF067063
AF251705	0	0	-7.64386	-7.64386	0	.	chr11	114996769	115001880	-	NM_134158	.	.	.
AF357355	0	0	-7.64386	-7.64386	0	100303646	chr12	109654627	109654697	+	NR_028433	snoRNA	MBII-343	snoRNA AF357355
AF357359	0	0	-7.64386	-7.64386	0	100303647	chr12	109650709	109650738	+	NR_028434	snoRNA	MBII-426	snoRNA AF357359
AF357399	0	0	-7.64386	-7.64386	0	100302567	chr7	28351540	28351633	+	NR_028129	snoRNA	MBI-142	snoRNA AF357399
AF357425	0	0	-7.64386	-7.64386	0	449562	chr12	109636012	109636080	+	NR_046302	snoRNA	MBII-48	snoRNA AF357425
AF357426	0	0	-7.64386	-7.64386	0	449561	chr12	109642838	109642904	+	NR_046303	snoRNA	MBII-49	snoRNA AF357426
AF366264	0	0.050263	-7.64386	-4.17754	3.46631	231201	chr8	13835231	13838089	-	NM_153093	protein_coding	Susp4	cDNA sequence AF366264
AF529169	0	0	-7.64386	-7.64386	0	209743	chr9	89590035	89622986	-	NM_153509	protein_coding	DD1| Kiaa1024	cDNA sequence AF529169
AI115009	0.0277838	0.108163	-4.93087	-3.14353	1.78735	99542	chr3	152666913	152681432	+	NR_040386	lncRNA	.	expressed sequence AI115009
AI118078	0.062369	0.0404166	-3.89177	-4.46064	-0.568865	.	chr9	55326949	55438344	+	NM_172923	.	.	.
AI182371	0.397918	0.241949	-1.31144	-2.01771	-0.706273	98870	chr2	35081861	35100685	-	NM_001243103	protein_coding	AI046667	expressed sequence AI182371
AI197445	0.0100738	0	-6.05181	-7.64386	-1.59204	105120	chr13	107469822	107479188	+	NR_045084	lncRNA	.	expressed sequence AI197445
AI314180	22.8814	20.8505	4.51642	4.38236	-0.134063	230249	chr4	58800031	58912725	-	NM_172381	protein_coding	AW558785| BB181316| mKIAA0368	expressed sequence AI314180
AI314278	0.0422318	0.0205266	-4.4041	-5.29185	-0.887757	101521	chr7	89426306	89432077	+	NR_102276	lncRNA	.	expressed sequence AI314278
AI317395	0.111017	0.233714	-3.10759	-2.06664	1.04095	.	chr10	40001573	40025268	-	NM_144821	.	.	.
AI413582	24.0007	31.3455	4.58531	4.97042	0.385111	106672	chr17	27563769	27565727	-	NM_001002895	protein_coding	AI854251	expressed sequence AI413582
AI414108	0.22617	0.219413	-2.11297	-2.15577	-0.0427979	.	chr9	27352685	27357543	+	NR_027907	.	.	.
AI427809	0	0	-7.64386	-7.64386	0	381524	chr4	53261356	53270232	-	NR_033140	lncRNA	Gm1659	expressed sequence AI427809
AI429214	1.30518	1.70165	0.389765	0.771167	0.381402	621080	chr8	36993575	36995533	+	NM_001039220	protein_coding	.	expressed sequence AI429214
AI450353	3.01844	1.90345	1.59619	0.932401	-0.66379	103729	chr11	83293430	83294929	+	NR_028364	lncRNA	.	expressed sequence AI450353
AI463170	0.13689	0.13586	-2.81716	-2.82767	-0.0105109	100504549	chr12	76546972	76547925	-	NR_046044	lncRNA	.	expressed sequence AI463170
AI464131	2.36329	2.56188	1.24385	1.36002	0.11617	329828	chr4	41495601	41503075	-	NM_001085515	protein_coding	AA408153| AI604836| Gm762| Kiaa1161| NET37	expressed sequence AI464131
AI467606	36.0303	46.0621	5.17134	5.52566	0.354326	101602	chr7	127091436	127094049	+	NM_178901	protein_coding	.	expressed sequence AI467606
AI504432	0.00857153	0	-6.20327	-7.64386	-1.44058	229694	chr3	107039504	107054322	+	NR_033498	lncRNA	A230102G19	expressed sequence AI504432
AI506816	22.3995	12.3001	4.48572	3.62118	-0.864532	433855	chr5	23692261	23712667	-	NR_015554	lncRNA	.	expressed sequence AI506816
AI507597	0	0.204641	-7.64386	-2.25401	5.38985	100165	chr4	141614370	141615604	+	NR_033566	lncRNA	.	expressed sequence AI507597
AI593442	0	0.00816269	-7.64386	-6.2474	1.39645	330941	chr9	52673032	52679780	-	NM_001286641	protein_coding	E130102D23	expressed sequence AI593442
AI597479	7.23431	7.92538	2.85585	2.98739	0.131538	98404	chr1	43098710	43115946	+	NM_133818	protein_coding	.	expressed sequence AI597479
AI606473	0	0	-7.64386	-7.64386	0	99686	chr3	154330821	154334687	+	NR_040387	lncRNA	.	expressed sequence AI606473
AI607873	0.68418	2.83315	-0.537047	1.50495	2.042	226691	chr1	173723428	173741809	-	NM_001204910	protein_coding	.	expressed sequence AI607873
AI646519	0	0	-7.64386	-7.64386	0	99041	chr2	147361543	147362793	-	NR_040330	lncRNA	Aspax1| OTTMUSG00000015701	expressed sequence AI646519
AI661453	12.8846	11.5056	3.68814	3.52489	-0.163244	224833	chr17	47436639	47470638	+	NM_145489	protein_coding	.	expressed sequence AI661453
AI662270	0	0.111368	-7.64386	-3.10323	4.54062	100043636	chr11	83223576	83226584	+	NR_015519	lncRNA	AW496474	expressed sequence AI662270
AI837181	36.9611	45.8853	5.20813	5.52012	0.311986	107242	chr19	5425144	5427316	+	NM_134149	protein_coding	Bles03| N28173	expressed sequence AI837181
AI839979	0.0946536	0.277344	-3.32693	-1.82447	1.50246	100740	chr5	31569592	31571397	-	NR_102275	lncRNA	.	expressed sequence AI839979
AI846148	14.5341	18.2875	3.86187	4.19318	0.331314	68229	chr19	7356464	7383026	-	NM_001033139	protein_coding	1700105P06Rik	expressed sequence AI846148
AI847159	0	0	-7.64386	-7.64386	0	100048701	chr2	129178148	129180673	-	NR_045264	lncRNA	OTTMUSG00000015420	expressed sequence AI847159
AI854517	0.0138685	0	-5.72788	-7.64386	-1.91598	.	chr7	79500026	79534403	+	NR_040313	.	.	.
AI854703	1.20947	0.976245	0.280327	-0.0273147	-0.307642	243373	chr6	48628167	48633688	+	NR_027236	misc_RNA	AI182503| D630044C04	expressed sequence AI854703
AI987944	5.90188	7.18334	2.5624	2.84566	0.283262	233168	chr7	41372930	41393260	-	NM_001199330	protein_coding	.	expressed sequence AI987944
AK010878	10.3865	13.0704	3.37733	3.70878	0.331451	100233175	chr12	102753275	102757810	-	NM_001142938	protein_coding	.	cDNA sequence AK010878
AU015228	0	0	-7.64386	-7.64386	0	99169	chr2	130100394	130103375	+	NM_001033197	protein_coding	.	expressed sequence AU015228
AU015791	0	0	-7.64386	-7.64386	0	104932	chr12	105513433	105515248	+	NR_102381	lncRNA	.	expressed sequence AU015791
AU015836	0	0	-7.64386	-7.64386	0	385493	chrX	93968656	93975470	+	NR_028320	lncRNA	.	expressed sequence AU015836
AU016765	0	0	-7.64386	-7.64386	0	100043582	chr17	64514089	64555590	-	NR_045899	lncRNA	.	expressed sequence AU016765
AU018091	0.127022	0.16443	-2.92115	-2.56124	0.359911	245128	chr7	3154659	3169203	-	NM_001004153	protein_coding	.	expressed sequence AU018091
AU019823	6.06759	6.84283	2.60231	2.77565	0.173335	270156	chr9	50605240	50617464	-	NM_212449	protein_coding	Gm639	expressed sequence AU019823
AU019990	0.0493359	0.0479898	-4.20195	-4.23814	-0.036191	767814	chr2	132598196	132653064	+	NR_033468	lncRNA	.	expressed sequence AU019990
AU021063	0.849569	0.240265	-0.226731	-2.02759	-1.80086	105968	chr15	101221247	101222155	+	NR_045996	lncRNA	.	expressed sequence AU021063
AU021092	0.431725	0.153109	-1.1952	-2.66101	-1.46581	239691	chr16	5211819	5222299	-	NM_001033220	protein_coding	.	expressed sequence AU021092
AU022252	4.07734	4.07539	2.0294	2.02871	-0.000689293	230696	chr4	119225138	119232724	-	NM_001012400	protein_coding	230696| AI450326	expressed sequence AU022252
AU022751	0	0	-7.64386	-7.64386	0	102991	chrX	6081218	6083420	-	NM_001033211	protein_coding	AU023811	expressed sequence AU022751
AU022754	1.00764	0.545513	0.0181214	-0.861151	-0.879273	105975	chr15	85581142	85593708	+	NR_040433	lncRNA	.	expressed sequence AU022754
AU022793	0	0	-7.64386	-7.64386	0	105976	chr15	39962649	39967515	+	NR_045719	lncRNA	.	expressed sequence AU022793
AU023762	0.0231924	0	-5.14855	-7.64386	-2.49531	102688	chr9	113496746	113587152	-	NR_040760	lncRNA	.	expressed sequence AU023762
AU040320	10.0564	15.1326	3.33076	3.92006	0.589305	100317	chr4	126753555	126869694	+	NM_001035525	protein_coding	A730047D20Rik| AAVR| Kiaa0319l	expressed sequence AU040320
AU040972	0.165171	0	-2.55494	-7.64386	-5.08891	104522	chr11	79481723	79484031	-	NR_045305	lncRNA	AU040954	expressed sequence AU040972
AU041133	1.52651	1.81293	0.614955	0.862297	0.247342	216177	chr10	82128013	82153065	+	NM_001163064	protein_coding	.	expressed sequence AU041133
AV039307	0.277342	0.271121	-1.82448	-1.85663	-0.0321431	100502700	chr2	120850656	120866690	+	NR_038350	lncRNA	.	expressed sequence AV039307
AV051173	0.656972	0.432613	-0.595158	-1.19227	-0.597115	100502959	chr4	116684965	116686022	-	NR_040442	lncRNA	.	expressed sequence AV051173
AV064505	0	0	-7.64386	-7.64386	0	102722	chr9	7669429	7695631	-	NR_126562	lncRNA	.	expressed sequence AV064505
AV320801	0	0	-7.64386	-7.64386	0	331531	chrX	135167624	135494719	-	NM_177918	protein_coding	4932408M16	expressed sequence AV320801
AW011738	0.0540654	0.0700365	-4.08154	-3.73626	0.345279	100382	chr4	156203284	156206028	+	NR_030671	lncRNA	.	expressed sequence AW011738
AW046200	0.318775	0.379718	-1.62694	-1.37813	0.24881	100502619	chr8	57651753	57663430	+	NR_040698	lncRNA	.	expressed sequence AW046200
AW112010	1.44803	2.37133	0.539064	1.24874	0.709671	107350	chr19	11047612	11050566	-	NR_102366	lncRNA	.	expressed sequence AW112010
AW146154	1.62753	2.10689	0.70711	1.07853	0.371425	101835	chr7	41478874	41499890	-	NM_001033530	protein_coding	AI451288	expressed sequence AW146154
AW209491	6.61466	9.92948	2.72676	3.31244	0.585687	105351	chr13	14630245	14638202	+	NM_001104646	protein_coding	.	expressed sequence AW209491
AW495222	0	0	-7.64386	-7.64386	0	105364	chr13	93706100	93719175	-	NR_045086	lncRNA	.	expressed sequence AW495222
AW549542	0	0	-7.64386	-7.64386	0	100993	chr5	119570129	119580358	-	NR_045702	lncRNA	.	expressed sequence AW549542
AW549877	10.7587	15.5682	3.4281	3.96099	0.532891	106064	chr15	3982035	3995752	-	NM_145930	protein_coding	AI195826	expressed sequence AW549877
AW551984	0	0	-7.64386	-7.64386	0	244810	chr9	39587396	39604124	-	NM_001199556	protein_coding	3222402N16	expressed sequence AW551984
AW554918	2.12545	1.64756	1.09116	0.724703	-0.366456	225289	chr18	25169020	25467321	+	NM_001033532	protein_coding	4921538P22| AI461742| Kiaa1328| mKIAA1328	expressed sequence AW554918
AW822252	0	0	-7.64386	-7.64386	0	331578	chrX	53696922	53716578	-	NR_110489	lncRNA	C230063B02	expressed sequence AW822252
AY074887	0.279118	0.549764	-1.81544	-0.850054	0.965384	246735	chr9	54950257	54950954	-	NM_145229	protein_coding	Mcpr1	cDNA sequence AY074887
AY358078	0.109392	0.106633	-3.12794	-3.16316	-0.0352226	278676	chr14	51800046	51826359	+	NM_194347	protein_coding	.	cDNA sequence AY358078
AY512915	0	0	-7.64386	-7.64386	0	414067	chr6	95290574	95333993	-	NR_033559	lncRNA	.	cDNA sequence AY512915
AY512931	0.125422	0.182876	-2.93874	-2.41215	0.526594	434310	chr8	45060702	45065418	-	NR_033588	lncRNA	.	cDNA sequence AY512931
AY702102	0	0	-7.64386	-7.64386	0	446211	chr2	169962013	169963187	-	NR_131974	lncRNA	STDP1	cDNA sequence AY702102
AY702103	0	0	-7.64386	-7.64386	0	446210	chr17	50239208	50246316	+	NR_131975	lncRNA	STDP2	cDNA sequence AY702103
AY761184	0	0	-7.64386	-7.64386	0	382000	chr8	21702524	21703647	-	NM_001007582	protein_coding	CRS1C-3| CRS1C-6	cDNA sequence AY761184
AY761185	0	0	-7.64386	-7.64386	0	100503970	chr8	20943694	20944748	-	NM_001012640	protein_coding	.	cDNA sequence AY761185
Aaas	44.5095	45.7589	5.4762	5.51614	0.0399347	223921	chr15	102338247	102350759	-	NM_153416	protein_coding	AAA| ADRACALA| D030041N15Rik| GL003	achalasia, adrenocortical insufficiency, alacrimia
Aacs	37.5676	40.9298	5.23161	5.35526	0.123647	78894	chr5	125475873	125517403	+	NM_030210	protein_coding	2210408B16Rik| SUR5	acetoacetyl-CoA synthetase
Aadac	0.0420622	0	-4.40929	-7.64386	-3.23457	67758	chr3	60031788	60040157	+	NM_023383	protein_coding	5033417E09Rik| Aada| AI265437	arylacetamide deacetylase (esterase)
Aadacl2	0	0	-7.64386	-7.64386	0	639634	chr3	60006743	60025420	+	NM_001128091	protein_coding	EG639634	arylacetamide deacetylase-like 2
Aadacl3	0	0	-7.64386	-7.64386	0	230883	chr4	144453771	144463756	-	NM_001085503	protein_coding	Gm435	arylacetamide deacetylase-like 3
Aadat	0.0581451	0.0283018	-3.98519	-4.90826	-0.923071	23923	chr8	60506124	60545677	+	NM_011834	protein_coding	Aadt| AI875679| Kat2| KATII| mKat-2	aminoadipate aminotransferase
Aaed1	12.0097	16.2014	3.58673	4.01849	0.431763	66129	chr13	64291836	64312710	-	NM_025370	protein_coding	1110018J18Rik| AI849003	AhpC/TSA antioxidant enzyme domain containing 1
Aagab	13.303	15.1373	3.73422	3.92051	0.186291	66939	chr9	63602655	63641889	+	NM_025857	protein_coding	2310007F21Rik| p34	alpha- and gamma-adaptin binding protein
Aak1	5.17967	4.68096	2.37425	2.22834	-0.145908	269774	chr6	86849517	87003227	+	NM_177762	protein_coding	5530400K14Rik| 9630042K20| AU067724| AU067726| BC028270| C79663| D6Ertd245e| mKIAA1048| R75501	AP2 associated kinase 1
Aamdc	3.95459	4.06271	1.98535	2.02422	0.0388658	66273	chr7	97550331	97579497	-	NM_001177947	protein_coding	1810020D17Rik| 1810037D19Rik| LI2	adipogenesis associated Mth938 domain containing
Aamp	80.4032	94.9572	6.32927	6.56928	0.240011	227290	chr1	74279840	74284738	-	NM_001190444	protein_coding	Aamp-rs| AU040907	angio-associated migratory protein
Aanat	0	0	-7.64386	-7.64386	0	11298	chr11	116593687	116597680	+	NM_009591	protein_coding	AA-NAT| Nat-2| Nat4| Snat	arylalkylamine N-acetyltransferase
Aar2	10.6288	13.2292	3.41059	3.7262	0.315614	68295	chr2	156547576	156568972	+	NM_026661	protein_coding	0610011L14Rik	AAR2 splicing factor homolog
Aard	0.0400728	0.0781755	-4.4716	-3.5877	0.883902	239435	chr15	52040107	52045722	+	NM_175503	protein_coding	A5D3| AV328152	alanine and arginine rich domain containing protein
Aars	78.9418	188.873	6.30281	7.56131	1.2585	234734	chr8	111033842	111055569	+	NM_146217	protein_coding	AI316495| C76919| sti	alanyl-tRNA synthetase
Aars2	8.0798	5.96508	3.01521	2.57775	-0.437462	224805	chr17	45506841	45520843	+	NM_198608	protein_coding	Aarsl| AlaRS| Gm89	alanyl-tRNA synthetase 2, mitochondrial
Aarsd1	23.5516	15.6467	4.55806	3.96825	-0.589812	69684	chr11	101406840	101417433	-	NM_144829	protein_coding	1110069E20Rik| 2310044P18Rik| AA589600| AlaX| AlaXp-II	alanyl-tRNA synthetase domain containing 1
Aasdh	3.50254	2.66135	1.81046	1.41487	-0.395593	231326	chr5	76875935	76905514	-	NM_173765	protein_coding	A230062G08Rik| A830035E16| Acsf4| U26	aminoadipate-semialdehyde dehydrogenase
Aasdhppt	8.03841	7.95872	3.00781	2.99344	-0.0143648	67618	chr9	4294793	4309494	-	NM_026276	protein_coding	2010309J24Rik| 2810407B07Rik| AASD-PPT| CGI-80| LYS2| LYS5	aminoadipate-semialdehyde dehydrogenase-phosphopantetheinyl transferase
Aass	0.0785511	0.0889572	-3.5812	-3.41185	0.169345	30956	chr6	23072173	23132986	-	NM_013930	protein_coding	LKR| LKR/SDH| LOR| LOR/SDH| Lorsdh| SDH	aminoadipate-semialdehyde synthase
Aatf	46.5352	49.9932	5.54041	5.6438	0.103399	56321	chr11	84422856	84513501	-	NM_019816	protein_coding	4933415H02Rik| 5830465M17Rik| Che-1| Trb	apoptosis antagonizing transcription factor
Aatk	0.0275945	0.115997	-4.93923	-3.04696	1.89227	11302	chr11	120007316	120047145	-	NM_001198787	protein_coding	AATYK| aatyk1| mKIAA0641	apoptosis-associated tyrosine kinase
Abat	0.139594	0.104188	-2.78992	-3.19511	-0.405193	268860	chr16	8513429	8621567	+	NM_172961	protein_coding	9630038C02Rik| AI255750| ENSMUSG00000051226| Gabaat| Gabat| Gm9851| I54| Laibat| X61497	4-aminobutyrate aminotransferase
Abca1	0.118321	0.123499	-3.01951	-2.96017	0.0593386	11303	chr4	53030789	53159895	-	NM_013454	protein_coding	ABC-1| Abc1	ATP-binding cassette, sub-family A (ABC1), member 1
Abca12	0.0112736	0.213108	-5.94132	-2.19689	3.74444	74591	chr1	71243090	71414910	-	NM_175210	protein_coding	4832428G11Rik| 4833417A11Rik	ATP-binding cassette, sub-family A (ABC1), member 12
Abca13	0	0	-7.64386	-7.64386	0	268379	chr11	9191942	9684259	+	NM_178259	protein_coding	9830132L24| A930002G16Rik| AI956815	ATP-binding cassette, sub-family A (ABC1), member 13
Abca14	0.00883641	0	-6.17539	-7.64386	-1.46847	67928	chr7	120203964	120325352	+	NM_026458	protein_coding	1700110B15Rik| 4930539G24Rik	ATP-binding cassette, sub-family A (ABC1), member 14
Abca15	0	0	-7.64386	-7.64386	0	320631	chr7	120328684	120407687	+	NM_177213	protein_coding	4930500I12Rik	ATP-binding cassette, sub-family A (ABC1), member 15
Abca16	0	0.0100632	-7.64386	-6.05283	1.59103	233810	chr7	120409647	120544809	+	NM_001278943	protein_coding	AY243472	ATP-binding cassette, sub-family A (ABC1), member 16
Abca17	0	0	-7.64386	-7.64386	0	381072	chr17	24264279	24347252	-	NM_001031621	protein_coding	.	ATP-binding cassette, sub-family A (ABC1), member 17
Abca2	12.6399	9.97783	3.66048	3.31945	-0.341035	11305	chr2	25428674	25448539	+	NM_007379	protein_coding	Abc2| AI413825| D2H0S1474E| mKIAA1062	ATP-binding cassette, sub-family A (ABC1), member 2
Abca3	18.222	14.5813	4.18801	3.86654	-0.321463	27410	chr17	24352023	24410204	+	NM_013855	protein_coding	1810036E22Rik| ABC-C| Abc3	ATP-binding cassette, sub-family A (ABC1), member 3
Abca4	0.0259894	0.0125989	-5.01208	-5.82837	-0.81629	11304	chr3	122044460	122180061	+	NM_007378	protein_coding	Abc10| Abcr| AW050280| D430003I15Rik| RmP	ATP-binding cassette, sub-family A (ABC1), member 4
Abca5	6.90028	7.80033	2.7877	2.96446	0.17676	217265	chr11	110269369	110337716	-	NM_147219	protein_coding	ABC13| B930033A02Rik| mKIAA1888	ATP-binding cassette, sub-family A (ABC1), member 5
Abca6	0.0454599	0.00881823	-4.30872	-6.17728	-1.86856	76184	chr11	110176821	110251776	-	NM_147218	protein_coding	6330565N06Rik	ATP-binding cassette, sub-family A (ABC1), member 6
Abca7	14.8195	13.0432	3.88991	3.70578	-0.184133	27403	chr10	79997615	80015572	+	NM_013850	protein_coding	Abc51| ABCX	ATP-binding cassette, sub-family A (ABC1), member 7
Abca8a	0.118404	0.0246083	-3.01854	-5.07785	-2.05932	217258	chr11	110025634	110095937	-	NM_153145	protein_coding	.	ATP-binding cassette, sub-family A (ABC1), member 8a
Abca8b	0.122584	0.468074	-2.97048	-1.07986	1.89062	27404	chr11	109933406	109995816	-	NM_013851	protein_coding	Abca8	ATP-binding cassette, sub-family A (ABC1), member 8b
Abca9	0.143408	0	-2.75236	-7.64386	-4.8915	217262	chr11	110100822	110168153	-	NM_147220	protein_coding	D630040K07Rik	ATP-binding cassette, sub-family A (ABC1), member 9
Abcb10	13.8383	10.1685	3.79112	3.34674	-0.444372	56199	chr8	123952459	123983122	-	NM_019552	protein_coding	Abc-me| Abcb12	ATP-binding cassette, sub-family B (MDR/TAP), member 10
Abcb11	0.19516	0.331322	-2.32077	-1.57208	0.748689	27413	chr2	69238282	69342616	-	NM_021022	protein_coding	ABC16| Bsep| Lith1| PFIC2| PGY4| SPGP	ATP-binding cassette, sub-family B (MDR/TAP), member 11
Abcb1a	12.9756	12.8851	3.69829	3.68819	-0.0100936	18671	chr5	8660092	8748570	+	NM_011076	protein_coding	Abcb4| Evi32| mdr-3| Mdr1a| Mdr3| P-gp| Pgp| Pgy-3| Pgy3	ATP-binding cassette, sub-family B (MDR/TAP), member 1A
Abcb1b	40.1605	25.9545	5.32788	4.69819	-0.629694	18669	chr5	8798147	8866314	+	NM_011075	protein_coding	Abcb1| mdr| Mdr1| Mdr1b| Pgy-1| Pgy1	ATP-binding cassette, sub-family B (MDR/TAP), member 1B
Abcb4	1.33636	1.02146	0.423696	0.0376774	-0.386019	18670	chr5	8893721	8959226	+	NM_008830	protein_coding	mdr-2| Mdr2| Pgy-2| Pgy2	ATP-binding cassette, sub-family B (MDR/TAP), member 4
Abcb5	0	0	-7.64386	-7.64386	0	77706	chr12	118867824	118966421	-	NM_029961	protein_coding	9230106F14Rik	ATP-binding cassette, sub-family B (MDR/TAP), member 5
Abcb6	7.93658	11.474	2.98943	3.52093	0.531499	74104	chr1	75171641	75180283	-	NM_023732	protein_coding	1200005B17Rik	ATP-binding cassette, sub-family B (MDR/TAP), member 6
Abcb7	15.7707	9.14993	3.97963	3.19455	-0.785083	11306	chrX	104280565	104413846	-	NM_009592	protein_coding	AA517758| Abc7| AU019072	ATP-binding cassette, sub-family B (MDR/TAP), member 7
Abcb8	21.5563	20.6619	4.43037	4.36925	-0.0611222	74610	chr5	24394156	24409947	+	NM_029020	protein_coding	4833412N02Rik| AA409895	ATP-binding cassette, sub-family B (MDR/TAP), member 8
Abcb9	0.424212	1.71859	-1.22024	0.785417	2.00565	56325	chr5	124061857	124095798	-	NM_019875	protein_coding	mKIAA1520| TAPL	ATP-binding cassette, sub-family B (MDR/TAP), member 9
Abcc1	28.2962	28.8204	4.82279	4.84927	0.0264774	17250	chr16	14361558	14474878	+	NM_008576	protein_coding	Abcc1a| Abcc1b| Mdrap| MRP| Mrp1	ATP-binding cassette, sub-family C (CFTR/MRP), member 1
Abcc10	2.05636	2.05497	1.0436	1.04262	-0.000973155	224814	chr17	46303230	46328023	-	NM_145140	protein_coding	mFLJ00002| Mrp7	ATP-binding cassette, sub-family C (CFTR/MRP), member 10
Abcc12	0.0212569	0	-5.25116	-7.64386	-2.3927	244562	chr8	86504841	86566590	-	NM_172912	protein_coding	4930467B22Rik| MRP9	ATP-binding cassette, sub-family C (CFTR/MRP), member 12
Abcc2	0.247181	0.753509	-1.98747	-0.398762	1.58871	12780	chr19	43782308	43838218	+	NM_013806	protein_coding	Abc30| AI173996| Cmoat| cMRP| Mrp2	ATP-binding cassette, sub-family C (CFTR/MRP), member 2
Abcc3	61.487	48.8004	5.94233	5.60897	-0.333358	76408	chr11	94343295	94392976	-	NM_029600	protein_coding	1700019L09Rik| ABC31| MLP2| MOAT-D| MRP3	ATP-binding cassette, sub-family C (CFTR/MRP), member 3
Abcc4	22.8347	22.0351	4.51347	4.46206	-0.0514129	239273	chr14	118482692	118706219	-	NM_001163675	protein_coding	D630049P08Rik| MOATB| MRP4	ATP-binding cassette, sub-family C (CFTR/MRP), member 4
Abcc5	14.4095	8.34492	3.84945	3.06176	-0.787687	27416	chr16	20331304	20426394	-	NM_013790	protein_coding	2900011L11Rik| Abcc5a| Abcc5b| AI132311| Mrp5	ATP-binding cassette, sub-family C (CFTR/MRP), member 5
Abcc6	0	0	-7.64386	-7.64386	0	27421	chr7	45976380	46030286	-	NM_018795	protein_coding	Abcc1b| DCC| dyscalc| Dyscalc1| Mrp6	ATP-binding cassette, sub-family C (CFTR/MRP), member 6
Abcc8	0.106049	0.196401	-3.17073	-2.31186	0.858874	20927	chr7	46104523	46180033	-	NM_011510	protein_coding	D930031B21Rik| Sur| SUR1	ATP-binding cassette, sub-family C (CFTR/MRP), member 8
Abcc9	0.00641941	0.0124548	-6.45237	-5.84023	0.612136	20928	chr6	142587862	142702274	-	NM_021042	protein_coding	AI414027| AI449286| Sur2| SUR2A| SUR2B	ATP-binding cassette, sub-family C (CFTR/MRP), member 9
Abcd1	5.67121	5.52012	2.50493	2.46601	-0.0389222	11666	chrX	73716597	73738287	+	NM_007435	protein_coding	Ald| Aldgh| ALDP	ATP-binding cassette, sub-family D (ALD), member 1
Abcd2	0.0428898	0.0415991	-4.38414	-4.42355	-0.0394163	26874	chr15	91145871	91191807	-	NM_011994	protein_coding	ABC39| ALDL1| ALDR| ALDRP	ATP-binding cassette, sub-family D (ALD), member 2
Abcd3	27.3134	30.5954	4.7718	4.93548	0.163678	19299	chr3	121758910	121815215	-	NM_008991	protein_coding	AI313901| AU018866| AW146054| PMP68| PMP70| Pxmp1	ATP-binding cassette, sub-family D (ALD), member 3
Abcd4	11.7894	15.7684	3.56003	3.97942	0.419392	19300	chr12	84602531	84617466	-	NM_008992	protein_coding	P69r| P70R| Pxmp1l	ATP-binding cassette, sub-family D (ALD), member 4
Abce1	83.6977	77.976	6.3872	6.28505	-0.102152	24015	chr8	79683442	79711740	-	NM_015751	protein_coding	C79080| Oabp| RLI| Rnaseli| RNS41	ATP-binding cassette, sub-family E (OABP), member 1
Abcf1	87.2858	75.6486	6.44776	6.24134	-0.206421	224742	chr17	35956819	35969750	-	NM_013854	protein_coding	Abc50| AU041969| D17Wsu166e| GCN20	ATP-binding cassette, sub-family F (GCN20), member 1
Abcf2	93.8094	97.9145	6.55174	6.61352	0.0617868	27407	chr5	24565341	24577467	-	NM_001190443	protein_coding	0710005O05Rik| Drr3| E430001O06	ATP-binding cassette, sub-family F (GCN20), member 2
Abcf3	14.4158	16.0015	3.85008	4.00059	0.150507	27406	chr16	20548603	20561603	+	NM_013852	protein_coding	AI326318| AU016058| BB119416	ATP-binding cassette, sub-family F (GCN20), member 3
Abcg1	6.10661	3.83493	2.61155	1.94108	-0.670472	11307	chr17	31057694	31117981	+	NM_009593	protein_coding	Abc8| AW413978| White	ATP-binding cassette, sub-family G (WHITE), member 1
Abcg2	11.4345	6.07235	3.51595	2.60344	-0.91251	26357	chr6	58596672	58692451	+	NM_011920	protein_coding	ABC15| ABCP| AI428558| BCRP| Bcrp1| MXR| MXR1	ATP-binding cassette, sub-family G (WHITE), member 2
Abcg3	0	0	-7.64386	-7.64386	0	27405	chr5	104935057	104982717	-	NM_030239	protein_coding	Abcp2| Mxr2	ATP-binding cassette, sub-family G (WHITE), member 3
Abcg4	0.0936528	0.0779253	-3.3415	-3.59204	-0.250548	192663	chr9	44273190	44288244	-	NM_138955	protein_coding	6430517O04Rik	ATP-binding cassette, sub-family G (WHITE), member 4
Abcg5	0	0	-7.64386	-7.64386	0	27409	chr17	84658234	84682923	-	NM_031884	protein_coding	cmp| sterolin-1| trac	ATP-binding cassette, sub-family G (WHITE), member 5
Abcg8	0.0485902	0.0157301	-4.22189	-5.59213	-1.37024	67470	chr17	84676302	84700333	+	NM_001286005	protein_coding	1300003C16Rik| AI114946| sterolin-2	ATP-binding cassette, sub-family G (WHITE), member 8
Abhd1	8.39735	9.39286	3.07079	3.23233	0.161539	57742	chr5	30950066	30955091	+	NR_003522	misc_RNA	LABH-1| LABH1	abhydrolase domain containing 1
Abhd10	4.58693	5.07555	2.1991	2.34498	0.145884	213012	chr16	45729725	45742955	-	NM_001272070	protein_coding	.	abhydrolase domain containing 10
Abhd11	37.6953	43.4605	5.2365	5.4418	0.205295	68758	chr5	135009152	135012175	+	NM_001190437	protein_coding	1110054D16Rik| A630008N09Rik| Wbscr21	abhydrolase domain containing 11
Abhd11os	0.310564	0.618337	-1.664	-0.681916	0.98208	69812	chr5	135012122	135013157	-	NR_026688	lncRNA	2010001M06Rik| AI462243| Wbscr26| Wnscr26	abhydrolase domain containing 11, opposite strand
Abhd12	71.9522	62.9772	6.16907	5.97687	-0.192195	76192	chr2	150832515	150904731	-	NM_024465	protein_coding	1500011G07Rik| 6330583M11Rik| AI431047| AW547313	abhydrolase domain containing 12
Abhd12b	0	0	-7.64386	-7.64386	0	100504285	chr12	70154171	70183206	+	NM_001195033	protein_coding	Gm804	abhydrolase domain containing 12B
Abhd13	9.94888	8.44233	3.31526	3.0785	-0.236764	68904	chr8	9977717	9992154	+	NM_026868	protein_coding	1110065L07Rik| AI463703| AI788994	abhydrolase domain containing 13
Abhd14a	10.337	7.27471	3.37044	2.86388	-0.506562	68644	chr9	106440051	106447678	-	NM_001110272	protein_coding	1110013B16Rik| AW558221| Dorz1	abhydrolase domain containing 14A
Abhd14b	10.0612	7.10023	3.33145	2.82888	-0.502566	76491	chr9	106448640	106452918	+	NM_029631	protein_coding	1810013B01Rik	abhydrolase domain containing 14b
Abhd15	0.54132	0.189814	-0.872182	-2.35983	-1.48765	67477	chr11	77515117	77520628	+	NM_026185	protein_coding	1300007F04Rik	abhydrolase domain containing 15
Abhd16a	17.9459	13.8258	4.16598	3.78981	-0.376172	193742	chr17	35089291	35102987	+	NM_178592	protein_coding	AI326074| Bat-5| Bat5| D17H6S82E| NG26	abhydrolase domain containing 16A
Abhd16b	0.116661	0	-3.03906	-7.64386	-4.60479	241850	chr2	181493206	181494980	+	NM_183181	protein_coding	1700095H12	abhydrolase domain containing 16B
Abhd17a	49.085	45.8728	5.61736	5.51972	-0.097633	216169	chr10	80583649	80590341	-	NM_145421	protein_coding	1700013O15Rik| BC005632| D10Bwg1364e| Fam108a	abhydrolase domain containing 17A
Abhd17b	18.4726	21.5017	4.20771	4.42671	0.219009	226016	chr19	21653309	21685637	+	NM_146096	protein_coding	5730446C15Rik| Cgi67| Fam108b| Fam108b1	abhydrolase domain containing 17B
Abhd17c	25.7392	27.8518	4.68618	4.79996	0.113782	70178	chr7	84109356	84151893	-	NM_133722	protein_coding	2210412D01Rik| AL023007| Fam108c| Fam108c1	abhydrolase domain containing 17C
Abhd2	59.9745	56.9554	5.9064	5.83189	-0.0745102	54608	chr7	79273266	79361601	+	NM_018811	protein_coding	2210009N18Rik| Labh-2| LABH2	abhydrolase domain containing 2
Abhd3	0.244996	0.423859	-2.00002	-1.22142	0.778598	106861	chr18	10644411	10706696	-	NM_134130	protein_coding	AA675331| LABH3	abhydrolase domain containing 3
Abhd4	8.23778	15.0729	3.04313	3.91436	0.871233	105501	chr14	54254129	54269169	+	NM_001205181	protein_coding	1110035H23Rik| Abh4| AI429574	abhydrolase domain containing 4
Abhd5	4.71253	6.72118	2.23803	2.74979	0.511756	67469	chr9	122351616	122381523	+	NM_026179	protein_coding	1300003D03Rik| 2010002J10Rik| CDS| CGI-58| IECN5| NCIE2	abhydrolase domain containing 5
Abhd6	10.0761	9.92506	3.33358	3.3118	-0.0217787	66082	chr14	8002902	8056555	+	NM_025341	protein_coding	0610041D24Rik| AA673485| AV065425	abhydrolase domain containing 6
Abhd8	17.7224	17.5174	4.14791	4.13113	-0.0167806	64296	chr8	71456700	71463657	-	NM_022419	protein_coding	0910001L24Rik| AB030191	abhydrolase domain containing 8
Abi1	29.2997	32.2656	4.87306	5.01215	0.139088	11308	chr2	22939989	23040241	-	NM_007380	protein_coding	abi-1| E3B1| NAP1| Ssh3bp1	abl-interactor 1
Abi2	5.29691	4.29641	2.40651	2.10481	-0.301703	329165	chr1	60409619	60481163	+	NM_001198571	protein_coding	8430425M24Rik| AI839867| C130078H13	abl-interactor 2
Abi3	1.32755	2.99851	0.41419	1.58665	1.17246	66610	chr11	95830072	95842476	-	NM_001163464	protein_coding	2210414K06Rik| AI987680| NESH	ABI gene family, member 3
Abi3bp	0.0218434	0	-5.21929	-7.64386	-2.42457	320712	chr16	56477846	56690135	+	NM_001014424	protein_coding	5033411B22Rik| AI506287| BG172926| D930038M13Rik| eratin| TARSH	ABI gene family, member 3 (NESH) binding protein
Abl1	25.4594	22.9796	4.67041	4.5226	-0.147814	11350	chr2	31688537	31804362	+	NM_001283046	protein_coding	Abl| AI325092| c-Abl| E430008G22Rik	c-abl oncogene 1, non-receptor tyrosine kinase
Abl2	16.7136	16.2891	4.06338	4.02628	-0.0371044	11352	chr1	156558787	156649619	+	NM_009595	protein_coding	AA536808| Abll| Arg	v-abl Abelson murine leukemia viral oncogene 2 (arg, Abelson-related gene)
Ablim1	11.1967	7.30683	3.48565	2.87023	-0.615413	226251	chr19	57033264	57216032	-	NM_001290813	protein_coding	2210411C18Rik| 2610209L21Rik| 4833406P10Rik| 9330196J19Rik| AV079770| AW060987| AW215784| Limab1| mKIAA0059	actin-binding LIM protein 1
Ablim2	0.0423495	0.119585	-4.40051	-3.0048	1.39571	231148	chr5	35757880	35884979	+	NM_001177700	protein_coding	AI606905| C230091L11	actin-binding LIM protein 2
Ablim3	0.616146	0.745285	-0.686996	-0.414489	0.272506	319713	chr18	61799393	61911852	-	NM_198649	protein_coding	AW990719| D930036B08Rik	actin binding LIM protein family, member 3
Abo	0	0	-7.64386	-7.64386	0	80908	chr2	26842503	26864995	-	NM_030718	protein_coding	NAGAT	ABO blood group (transferase A, alpha 1-3-N-acetylgalactosaminyltransferase, transferase B, alpha 1-3-galactosyltransferase)
Abr	28.2243	32.398	4.81912	5.01806	0.198934	109934	chr11	76416732	76577739	-	NM_001291186	protein_coding	.	active BCR-related gene
Abra	0	0	-7.64386	-7.64386	0	223513	chr15	41865293	41869720	-	NM_175456	protein_coding	C130068O12Rik| STARS	actin-binding Rho activating protein
Abracl	52.214	42.1097	5.7065	5.39625	-0.310251	73112	chr10	18011260	18023252	-	NM_028440	protein_coding	1700028I04Rik| 3110003A17Rik	ABRA C-terminal like
Abt1	4.87699	5.91249	2.28747	2.56499	0.277516	30946	chr13	23418361	23423866	-	NM_013924	protein_coding	.	activator of basal transcription 1
Abtb1	4.9204	8.03396	2.30024	3.00701	0.706768	80283	chr6	88835914	88841935	-	NM_030251	protein_coding	AI847549| BC003234| BPOZ| EF1ABP	ankyrin repeat and BTB (POZ) domain containing 1
Abtb2	3.22769	7.90561	1.69274	2.98379	1.29105	99382	chr2	103566310	103718423	+	NM_178890	protein_coding	AW539457| BPOZ-2	ankyrin repeat and BTB (POZ) domain containing 2
Acaa1a	22.9686	29.3367	4.52191	4.87488	0.352976	113868	chr9	119341294	119350295	+	NM_130864	protein_coding	Acaa| Acaa1| D9Ertd25e| PTL	acetyl-Coenzyme A acyltransferase 1A
Acaa1b	1.00092	0.944308	0.00851557	-0.0750519	-0.0835674	235674	chr9	119148043	119157093	-	NM_146230	protein_coding	.	acetyl-Coenzyme A acyltransferase 1B
Acaa2	17.3287	14.5102	4.11551	3.85949	-0.256015	52538	chr18	74779212	74806207	+	NM_177470	protein_coding	0610011L04Rik| AI255831| AI265397| D18Ertd240e	acetyl-Coenzyme A acyltransferase 2 (mitochondrial 3-oxoacyl-Coenzyme A thiolase)
Acaca	16.7339	9.58757	4.06513	3.26192	-0.803215	107476	chr11	84195438	84401651	+	NM_133360	protein_coding	A530025K05Rik| Acac| Acc1| Gm738	acetyl-Coenzyme A carboxylase alpha
Acacb	0.0331591	0.0214291	-4.71183	-5.24173	-0.5299	100705	chr5	114165518	114250758	+	NM_133904	protein_coding	Acc2| Accb| AI597064| AW743042	acetyl-Coenzyme A carboxylase beta
Acad10	1.21927	0.819417	0.291922	-0.278554	-0.570476	71985	chr5	121621029	121660510	-	NM_028037	protein_coding	2410021P16Rik	acyl-Coenzyme A dehydrogenase family, member 10
Acad11	2.12617	1.90887	1.09165	0.936493	-0.155153	102632	chr9	104063703	104127646	+	NM_175324	protein_coding	5730439E10Rik| AI987948	acyl-Coenzyme A dehydrogenase family, member 11
Acad12	0.443025	0.717767	-1.15835	-0.468397	0.689951	338350	chr5	121598281	121618938	-	NM_178799	protein_coding	9330129D05Rik	acyl-Coenzyme A dehydrogenase family, member 12
Acad8	5.9047	5.43489	2.56308	2.44358	-0.119507	66948	chr9	26974139	26999549	-	NM_025862	protein_coding	2310016C19Rik| AI786953	acyl-Coenzyme A dehydrogenase family, member 8
Acad9	16.4904	13.1058	4.04399	3.71268	-0.331308	229211	chr3	36066000	36092857	+	NM_172678	protein_coding	2600017P15Rik| 4732402K02| C630012L17Rik| NPD002	acyl-Coenzyme A dehydrogenase family, member 9
Acadl	78.4636	83.5268	6.29404	6.38425	0.0902101	11363	chr1	66830839	66863309	-	NM_007381	protein_coding	AA960361| AU018452| C79855| LCAD	acyl-Coenzyme A dehydrogenase, long-chain
Acadm	27.5146	22.495	4.78239	4.49185	-0.290534	11364	chr3	153922353	153944643	-	NM_007382	protein_coding	AU018656| MCAD	acyl-Coenzyme A dehydrogenase, medium chain
Acads	30.6899	31.5003	4.93993	4.97752	0.0375956	11409	chr5	115110299	115119346	-	NM_007383	protein_coding	AI196007| Bcd-1| Bcd1| Hdlq8| SCAD	acyl-Coenzyme A dehydrogenase, short chain
Acadsb	8.40275	10.1948	3.07172	3.35047	0.278749	66885	chr7	131410601	131446211	+	NM_025826	protein_coding	1300003O09Rik| 2-MEBCAD| BB066609| SBCAD	acyl-Coenzyme A dehydrogenase, short/branched chain
Acadvl	24.1491	25.6837	4.5942	4.68306	0.0888658	11370	chr11	70010183	70015428	-	NM_017366	protein_coding	vlcad	acyl-Coenzyme A dehydrogenase, very long chain
Acan	108.059	76.8126	6.75574	6.26336	-0.492377	11595	chr7	79053483	79115099	+	NM_007424	protein_coding	Agc| Agc1| b2b183Clo| cmd| Cspg1	aggrecan
Acap1	11.922	14.1274	3.57616	3.82093	0.244775	216859	chr11	69881567	69895539	-	NM_153788	protein_coding	Centb1	ArfGAP with coiled-coil, ankyrin repeat and PH domains 1
Acap2	9.36632	10.3385	3.22825	3.37065	0.1424	78618	chr16	31092413	31201238	-	NM_030138	protein_coding	4832442G16| 9530039J15Rik| Centb2| CNT-B2| mKIAA0041	ArfGAP with coiled-coil, ankyrin repeat and PH domains 2
Acap3	6.69729	6.13109	2.74465	2.61732	-0.127334	140500	chr4	155891875	155907251	+	NM_207223	protein_coding	Centb5| Kiaa1716-hp| mKIAA1716	ArfGAP with coiled-coil, ankyrin repeat and PH domains 3
Acat1	9.62228	7.77143	3.26713	2.95911	-0.30802	110446	chr9	53580522	53610350	-	NM_144784	protein_coding	6330585C21Rik| Acat	acetyl-Coenzyme A acetyltransferase 1
Acat2	36.8764	39.8914	5.20482	5.31819	0.113365	110460	chr17	12943042	12960725	-	NM_009338	protein_coding	AW742799| Tcp-1x| Tcp1-rs1	acetyl-Coenzyme A acetyltransferase 2
Acat3	37.7098	32.9213	5.23706	5.04117	-0.19589	224530	chr17	12923959	12940396	-	NM_153151	protein_coding	ACTL	acetyl-Coenzyme A acetyltransferase 3
Acbd3	18.793	22.5991	4.23251	4.49851	0.266005	170760	chr1	180726043	180754204	+	NM_133225	protein_coding	60kDa| 8430407O11Rik| D1Ertd10e| GCP60| Gocap1| GOLPH1| Pap7	acyl-Coenzyme A binding domain containing 3
Acbd4	7.78148	9.87764	2.96097	3.3049	0.343925	67131	chr11	103101688	103112199	+	NM_025988	protein_coding	2010009P05Rik| 2010015A21Rik| AI849317	acyl-Coenzyme A binding domain containing 4
Acbd5	15.2244	17.7947	3.92879	4.15378	0.224994	74159	chr2	23068201	23114512	+	NM_001102436	protein_coding	1300014E15Rik	acyl-Coenzyme A binding domain containing 5
Acbd6	39.6952	42.7616	5.31107	5.41841	0.107338	72482	chr1	155558120	155687233	+	NM_026683	protein_coding	0610010G04Rik| 2610100E10Rik	acyl-Coenzyme A binding domain containing 6
Acbd7	0	0.275909	-7.64386	-1.83183	5.81203	78245	chr2	3336168	3340997	+	NM_030063	protein_coding	9230116B18Rik	acyl-Coenzyme A binding domain containing 7
Accs	1.36314	1.46958	0.452216	0.560304	0.108088	329470	chr2	93833467	93849943	-	NM_183220	protein_coding	2610203E10Rik| Phacs	1-aminocyclopropane-1-carboxylate synthase (non-functional)
Accsl	0	0	-7.64386	-7.64386	0	381411	chr2	93855360	93869157	-	NM_001033452	protein_coding	Gm1967	1-aminocyclopropane-1-carboxylate synthase (non-functional)-like
Acd	14.0028	16.7635	3.80816	4.06768	0.259523	497652	chr8	105698159	105701095	-	NM_001012638	protein_coding	.	adrenocortical dysplasia
Ace	0.234755	0.0755507	-2.06037	-3.63396	-1.57359	11421	chr11	105967945	105989964	+	NM_207624	protein_coding	AW208573| CD143	angiotensin I converting enzyme (peptidyl-dipeptidase A) 1
Ace2	0	0	-7.64386	-7.64386	0	70008	chrX	164139342	164188418	+	NM_001130513	protein_coding	2010305L05Rik	angiotensin I converting enzyme (peptidyl-dipeptidase A) 2
Ace3	0	0	-7.64386	-7.64386	0	217246	chr11	105994675	106005443	+	NM_001101453	protein_coding	EG217246	angiotensin I converting enzyme (peptidyl-dipeptidase A) 3
Acer1	0	0	-7.64386	-7.64386	0	171168	chr17	56953490	56982126	-	NM_175731	protein_coding	2310024P18Rik| AI662009| Alkcdase1| Asah3| Cer1	alkaline ceramidase 1
Acer2	2.29069	3.14818	1.19893	1.65681	0.45788	230379	chr4	86874414	86932490	+	NM_001290541	protein_coding	2410116I05Rik| Asah3l| CRG-L1| maCER2	alkaline ceramidase 2
Acer3	23.1392	17.8104	4.53258	4.15505	-0.377526	66190	chr7	98213660	98309527	-	NM_025408	protein_coding	1110057L18Rik| 5430429L08Rik| AV015045| Phca	alkaline ceramidase 3
Ache	0.136968	0.244175	-2.81636	-2.00477	0.811594	11423	chr5	137288254	137294466	+	NM_001290010	protein_coding	.	acetylcholinesterase
Acin1	89.0865	82.0723	6.47722	6.35891	-0.118305	56215	chr14	54642161	54686931	-	NM_019567	protein_coding	2610036I19Rik| 2610510L13Rik| Acinus| acinusL| acinusS| Acn| C79325| mKIAA0670	apoptotic chromatin condensation inducer 1
Ackr1	0	0	-7.64386	-7.64386	0	13349	chr1	173331886	173333503	-	NM_010045	protein_coding	AA162249| CCBP1| CD234| Darc| Dfy| ESTM35| FY| GPD	atypical chemokine receptor 1 (Duffy blood group)
Ackr2	0	0	-7.64386	-7.64386	0	59289	chr9	121898355	121911071	+	NM_021609	protein_coding	AI464239| Ccbp2| CCR10| CCR9| Cmkbr9| D6	atypical chemokine receptor 2
Ackr3	40.1487	46.2307	5.32746	5.53094	0.203474	12778	chr1	90203980	90215722	+	NM_007722	protein_coding	AW541270| Cmkor1| CXC-R7| CXCR-7| Cxcr7| RDC-1| Rdc1	atypical chemokine receptor 3
Ackr4	0.0480913	0.0701609	-4.23538	-3.73387	0.501507	252837	chr9	104098138	104126643	-	NM_145700	protein_coding	A630091E18Rik| CCBP2| CCR11| Ccrl1| CCX-CKR| CCX-CKR1| Cmkbrl1| PPR1| VSHK1	atypical chemokine receptor 4
Acly	100.564	89.6083	6.65204	6.48564	-0.166401	104112	chr11	100476352	100528000	-	NM_134037	protein_coding	A730098H14Rik| AW538652	ATP citrate lyase
Acmsd	0.0218208	0.0212146	-5.2205	-5.25349	-0.0329817	266645	chr1	127729413	127767564	+	NM_001033041	protein_coding	.	amino carboxymuconate semialdehyde decarboxylase
Acnat1	0.283489	0.247501	-1.79341	-1.98564	-0.192227	230161	chr4	49443532	49451109	-	NM_001164565	protein_coding	AI132189	acyl-coenzyme A amino acid N-acyltransferase 1
Acnat2	0.377929	0.460086	-1.38485	-1.10443	0.280421	209186	chr4	49379845	49408151	-	NM_145368	protein_coding	C730036D15Rik	acyl-coenzyme A amino acid N-acyltransferase 2
Aco1	23.84	20.672	4.57561	4.36995	-0.20566	11428	chr4	40143265	40199009	+	NM_007386	protein_coding	Aco-1| Irebp| Irp1	aconitase 1
Aco2	162.901	144.156	7.3479	7.17154	-0.176359	11429	chr15	81872463	81915137	+	NM_080633	protein_coding	Aco-2| Aco3| D10Wsu183e	aconitase 2, mitochondrial
Acot1	4.09552	5.01269	2.03581	2.32702	0.291216	26897	chr12	84009502	84017669	+	NM_012006	protein_coding	ACH2| CTE-1| CTE-I| Cte1| D12Ucla1	acyl-CoA thioesterase 1
Acot10	0	0.0335018	-7.64386	-4.69893	2.94493	64833	chr15	20665214	20666750	-	NM_022816	protein_coding	Acate3| MT-ACT48| p48	acyl-CoA thioesterase 10
Acot11	0.0502616	0.0568718	-4.17758	-4.01457	0.163005	329910	chr4	106744561	106799831	-	NM_025590	protein_coding	1110020M10Rik| 2010309H15Rik| AW060409| BFIT| BFIT1| mKIAA0707| Thea| Them1	acyl-CoA thioesterase 11
Acot12	0	0	-7.64386	-7.64386	0	74156	chr13	91741521	91786148	+	NM_028790	protein_coding	1300004O04Rik| 4930449F15Rik| AV027244| Cach| mCACH-1	acyl-CoA thioesterase 12
Acot13	25.9392	38.8043	4.69734	5.27833	0.58099	66834	chr13	24817955	24831489	-	NM_025790	protein_coding	0610006O17Rik| Them2	acyl-CoA thioesterase 13
Acot2	1.26342	3.81973	0.343033	1.93536	1.59233	171210	chr12	83987861	83993875	+	NM_134188	protein_coding	AA571646| MTE-I| Mte1	acyl-CoA thioesterase 2
Acot3	0	0	-7.64386	-7.64386	0	171281	chr12	84052151	84059564	+	NM_134246	protein_coding	AW108394| PTE-Ia| Pte2a	acyl-CoA thioesterase 3
Acot4	0.0863771	0.398876	-3.45202	-1.30802	2.14401	171282	chr12	84038379	84044723	+	NM_134247	protein_coding	B430212I04Rik| PTE-Ib| Pte1b| Pte2b	acyl-CoA thioesterase 4
Acot5	0	0	-7.64386	-7.64386	0	217698	chr12	84069325	84076019	+	NM_145444	protein_coding	BC016076| PTE-Ic	acyl-CoA thioesterase 5
Acot6	0.0566337	0.192936	-4.02014	-2.33689	1.68324	217700	chr12	84100654	84109783	+	NM_172580	protein_coding	4632408A20Rik| A330054B07| BE688602	acyl-CoA thioesterase 6
Acot7	96.559	100.145	6.59341	6.64602	0.0526051	70025	chr4	152178100	152271855	+	NM_133348	protein_coding	2410041A17Rik| Ach1| Act| Bach| Cte-II| CTE-IIa| Lach1	acyl-CoA thioesterase 7
Acot8	11.9135	13.8145	3.57513	3.78863	0.213503	170789	chr2	164792768	164804881	-	NM_133240	protein_coding	PTE-2| Pte1	acyl-CoA thioesterase 8
Acot9	58.6171	63.3278	5.87337	5.98488	0.111508	56360	chrX	155262500	155297507	+	NM_019736	protein_coding	0610041P13Rik| Acate2| C76421| MT-ACT48| MTE-2| p48| U8	acyl-CoA thioesterase 9
Acox1	28.3164	39.0231	4.82382	5.28644	0.462621	11430	chr11	116171883	116199045	-	NM_015729	protein_coding	Acox| AOX| D130055E20Rik| Paox	acyl-Coenzyme A oxidase 1, palmitoyl
Acox2	0.142862	0.281833	-2.75768	-1.80172	0.95596	93732	chr14	8225511	8259019	-	NM_001161667	protein_coding	THCCox	acyl-Coenzyme A oxidase 2, branched chain
Acox3	3.37983	4.85525	1.75908	2.28103	0.521947	80911	chr5	35583060	35613801	+	NM_030721	protein_coding	BI685180| EST-s59| PCOX	acyl-Coenzyme A oxidase 3, pristanoyl
Acoxl	0	0.0167417	-7.64386	-5.52339	2.12046	74121	chr2	127854628	128123892	+	NM_028765	protein_coding	1200014P05Rik| AV025673	acyl-Coenzyme A oxidase-like
Acp1	31.4824	33.2245	4.9767	5.05439	0.0776899	11431	chr12	30893326	30911612	-	NM_021330	protein_coding	4632432E04Rik| Acp-1| AI427468| Lmptp| LMW-PTP	acid phosphatase 1, soluble
Acp2	8.93087	8.72467	3.15961	3.12593	-0.0336811	11432	chr2	91202912	91214098	+	NM_007387	protein_coding	Acp-2| LAP	acid phosphatase 2, lysosomal
Acp5	5.52965	4.83169	2.46849	2.27402	-0.194472	11433	chr9	22126727	22135746	-	NM_007388	protein_coding	TRACP| TRAP	acid phosphatase 5, tartrate resistant
Acp6	30.0542	41.8202	4.90973	5.3863	0.476566	66659	chr3	97158777	97175793	+	NM_019800	protein_coding	5730559A09Rik| ACPL1| AU022842| mPACPL1	acid phosphatase 6, lysophosphatidic
Acpp	0.0546859	0.178344	-4.06647	-2.44738	1.61909	56318	chr9	104288240	104337722	-	NM_207668	protein_coding	5'-NT| A030005E02Rik| FRAP| Lap| PAP| Ppal	acid phosphatase, prostate
Acpt	0	0	-7.64386	-7.64386	0	100503991	chr7	44253087	44257204	-	NM_001195034	protein_coding	EG546967| Gm1432	acid phosphatase, testicular
Acr	0	0	-7.64386	-7.64386	0	11434	chr15	89568326	89574585	+	NM_001277246	protein_coding	.	acrosin prepropeptide
Acrbp	2.11269	3.09745	1.08249	1.63341	0.550917	54137	chr6	125049927	125063265	+	NM_001127340	protein_coding	OY-TES-1| sp32	proacrosin binding protein
Acrv1	0	0	-7.64386	-7.64386	0	11451	chr9	36693220	36698837	+	NM_007391	protein_coding	Msa63| SP-10	acrosomal vesicle protein 1
Acsbg1	21.4804	31.2856	4.42528	4.96766	0.542373	94180	chr9	54604997	54661885	-	NM_053178	protein_coding	BG1| Bgm| E230019G03Rik| GR-LACS| Lpd| R75185	acyl-CoA synthetase bubblegum family member 1
Acsbg2	0	0	-7.64386	-7.64386	0	328845	chr17	56843104	56874447	-	NM_001039114	protein_coding	Bgr	acyl-CoA synthetase bubblegum family member 2
Acsf2	5.84945	6.92271	2.54953	2.79238	0.242845	264895	chr11	94557102	94601786	-	NM_153807	protein_coding	.	acyl-CoA synthetase family member 2
Acsf3	7.31772	8.58337	2.87238	3.10238	0.230005	257633	chr8	122775505	122817881	+	NM_144932	protein_coding	BB101783	acyl-CoA synthetase family member 3
Acsl1	5.05781	5.81135	2.33994	2.54011	0.200176	14081	chr8	46471037	46536051	+	NM_007981	protein_coding	Acas| Acas1| Acs| Facl2| FACS| LACS 1| LACS1	acyl-CoA synthetase long-chain family member 1
Acsl3	31.3535	30.4459	4.97078	4.92841	-0.0423717	74205	chr1	78657825	78707743	+	NM_028817	protein_coding	2610510B12Rik| Acs3| C85929| Facl3| Pro2194	acyl-CoA synthetase long-chain family member 3
Acsl4	37.663	45.7834	5.23527	5.51691	0.281643	50790	chrX	142317993	142390535	-	NM_207625	protein_coding	9430020A05Rik| ACS4| AU018108| Facl4| Lacs4	acyl-CoA synthetase long-chain family member 4
Acsl5	196.761	175.598	7.62034	7.45617	-0.164163	433256	chr19	55253369	55296628	+	NM_027976	protein_coding	1700030F05Rik| ACS2| ACS5| Facl5	acyl-CoA synthetase long-chain family member 5
Acsl6	0.408016	0.4659	-1.27573	-1.08651	0.189223	216739	chr11	54303824	54361539	+	NM_001033598	protein_coding	A330035H04Rik| AW050338| Facl6| LACS| Lacsl| mKIAA0837	acyl-CoA synthetase long-chain family member 6
Acsm1	0	0	-7.64386	-7.64386	0	117147	chr7	119617828	119662515	+	NM_054094	protein_coding	Acas3| Bucs1| Macs	acyl-CoA synthetase medium-chain family member 1
[truncated: 21,185 more rows]

## Sheet: Up-regulated_Fold_change
	raw Data (FPKM)		Normalized Data (log2)		Fold_Change (log2)
Gene symbol	KPR-	KPRrestored	KPR-	KPRrestored	(KPRrestored)- (KPR-)
0610009B22Rik	16.7083	24.1175	4.06292	4.59231	0.529383
0610009L18Rik	0.443273	0.985373	-1.15755	-0.0139561	1.14359
0610040B10Rik	0.581959	1.35982	-0.768668	0.448711	1.21738
1010001N08Rik	1.14928	2.79866	0.206993	1.48731	1.28032
1110006O24Rik	1.30317	2.32127	0.38755	1.21802	0.830469
1110008P14Rik	23.445	33.6356	4.55152	5.07213	0.520616
1110012L19Rik	15.0584	22.2447	3.91298	4.47571	0.562738
1110017D15Rik	0	0.249674	-7.64386	-1.97328	5.67058
1110020A21Rik	0.347879	0.832665	-1.50275	-0.255555	1.2472
1110059G10Rik	1.46478	2.09812	0.5556	1.07253	0.516931
1190005I06Rik	0.552383	0.785117	-0.843259	-0.339862	0.503397
1300017J02Rik	0	0.0645086	-7.64386	-3.84666	3.79719
1500012F01Rik	64.7904	94.9547	6.01782	6.56924	0.551424
1500015A07Rik	0.96598	1.85338	-0.0424865	0.894046	0.936532
1500017E21Rik	0.0931545	0.561189	-3.3488	-0.820644	2.52816
1600014C23Rik	0.439326	0.727863	-1.17031	-0.448385	0.721925
1700001K19Rik	0	0.179737	-7.64386	-2.43646	5.2074
1700001L19Rik	0	0.0556089	-7.64386	-4.04433	3.59953
1700003F12Rik	0.347438	0.854457	-1.50456	-0.218503	1.28606
1700003G18Rik	0	0.109217	-7.64386	-3.13015	4.51371
1700003M07Rik	0	0.0751997	-7.64386	-3.64026	4.0036
1700007K09Rik	0.0973931	0.191981	-3.28781	-2.34387	0.943938
1700012B07Rik	0	0.0611518	-7.64386	-3.91808	3.72578
1700012B09Rik	0	0.28247	-7.64386	-1.79852	5.84534
1700012D14Rik	0	0.106852	-7.64386	-3.16034	4.48352
1700013F07Rik	0	0.234566	-7.64386	-2.0615	5.58235
1700016K19Rik	0	0.0627105	-7.64386	-3.88448	3.75938
1700017B05Rik	13.4227	21.6678	3.74714	4.43781	0.690673
1700019A02Rik	0	0.107369	-7.64386	-3.15368	4.49017
1700019B03Rik	0	0.0316813	-7.64386	-4.76881	2.87504
1700020L24Rik	2.20955	4.0193	1.14701	2.00874	0.861724
1700022H01Rik	0	0.0943569	-7.64386	-3.33124	4.31262
1700025M24Rik	0	0.122773	-7.64386	-2.96835	4.67551
1700026J14Rik	0	0.0764528	-7.64386	-3.61789	4.02596
1700026L06Rik	0.492199	1.45561	-1.0081	0.546571	1.55468
1700030C10Rik	0	0.0293517	-7.64386	-4.86347	2.78038
1700030J22Rik	0.380618	0.723312	-1.37476	-0.457371	0.917384
1700030K09Rik	3.93506	6.36815	1.97822	2.67201	0.693789
1700034J05Rik	0	0.0487476	-7.64386	-4.21766	3.4262
1700034P13Rik	2.70024	4.05144	1.43576	2.02021	0.584458
1700048M11Rik	0	0.164145	-7.64386	-2.56367	5.08019
1700049G17Rik	1.84794	2.644	0.889816	1.40545	0.515632
1700066B19Rik	0.039824	0.0967608	-4.47958	-3.29675	1.18284
1700071M16Rik	0.409245	0.614715	-1.27144	-0.690323	0.581121
1700084J12Rik	0	0.171553	-7.64386	-2.50183	5.14203
1700086O06Rik	1.33948	2.16785	0.427048	1.11959	0.69254
1700088E04Rik	6.11936	9.38592	2.61456	3.23127	0.616707
1700092M07Rik	0.769377	2.32992	-0.368892	1.22337	1.59227
1700096K18Rik	0.478608	0.861358	-1.04809	-0.206965	0.841125
1700099I09Rik	0.0971864	0.19156	-3.29072	-2.34696	0.943767
1700101I11Rik	0	0.0749019	-7.64386	-3.64563	3.99823
1700102H20Rik	0	0.693147	-7.64386	-0.518397	7.12546
1700105P06Rik	0	0.129934	-7.64386	-2.88967	4.75418
1700110K17Rik	0.0911859	0.179544	-3.37803	-2.43796	0.940068
1700123M08Rik	0.319302	0.572354	-1.62459	-0.792472	0.832118
1700124L16Rik	0.622996	1.2649	-0.671173	0.344715	1.01589
1700125H20Rik	0.17855	0.466064	-2.44575	-1.08601	1.35975
1810008I18Rik	0.755055	2.88214	-0.395824	1.52964	1.92547
1810010H24Rik	0.1025	0.651183	-3.21759	-0.60783	2.60976
1810011O10Rik	9.96622	30.1193	3.31777	4.91286	1.59509
1810013A23Rik	0	0.430151	-7.64386	-1.20041	6.44344
1810020O05Rik	0.544196	1.33049	-0.864607	0.417369	1.28198
1810044D09Rik	1.30327	2.11088	0.38766	1.08126	0.693597
1810053B23Rik	0	0.343216	-7.64386	-1.52195	6.12191
1810062G17Rik	0.129843	0.826941	-2.89065	-0.265447	2.6252
1810064F22Rik	0.0218313	0.0424496	-5.21994	-4.39746	0.822479
2010107G23Rik	0.240055	0.818053	-2.02882	-0.280943	1.74788
2010109A12Rik	0	0.132635	-7.64386	-2.86108	4.78278
2010109I03Rik	0	0.132456	-7.64386	-2.86296	4.7809
2200002J24Rik	0	0.335905	-7.64386	-1.55256	6.0913
2210404E10Rik	0	0.120131	-7.64386	-2.99849	4.64537
2210409D07Rik	0	0.180462	-7.64386	-2.4308	5.21305
2210417A02Rik	0.930591	1.31852	-0.0960501	0.40438	0.50043
2310001H17Rik	0.709693	1.57134	-0.484604	0.656579	1.14118
2310003N18Rik	0	0.180462	-7.64386	-2.4308	5.21305
2310005E17Rik	0	0.0456054	-7.64386	-4.30456	3.33929
2310010J17Rik	1.03126	1.82203	0.051386	0.8695	0.818114
2310030G06Rik	5.08	7.93408	2.34625	2.98897	0.642724
2310034G01Rik	0.471889	0.772526	-1.06827	-0.363037	0.705237
2310040G24Rik	0.903188	1.56004	-0.138937	0.6462	0.785137
2310047M10Rik	6.42247	10.9685	2.68425	3.45595	0.771701
2410004P03Rik	0	0.0559601	-7.64386	-4.03599	3.60787
2410006H16Rik	150.473	307.106	7.23341	8.26262	1.02921
2410012E07Rik	0	0.0775597	-7.64386	-3.59842	4.04544
2410018L13Rik	0.800179	1.22608	-0.312619	0.299925	0.612543
2510009E07Rik	0.00922852	0.0447593	-6.13507	-4.32889	1.80618
2610305D13Rik	0.25259	0.415406	-1.95685	-1.25014	0.706707
2610306M01Rik	2.10042	3.1357	1.07411	1.65109	0.576978
2610528A11Rik	0.582583	0.981809	-0.767135	-0.0191572	0.747978
2810405F15Rik	0	0.132802	-7.64386	-2.85933	4.78452
2810468N07Rik	0	0.0781066	-7.64386	-3.58889	4.05496
2900009J06Rik	0.352952	0.528809	-1.48216	-0.905604	0.576557
2900011O08Rik	0	0.0206992	-7.64386	-5.28213	2.36172
2900076A07Rik	0.847613	1.66273	-0.230037	0.737886	0.967923
3110009F21Rik	0.6468	1.00803	-0.617499	0.0186769	0.636176
3110039M20Rik	8.12296	13.0247	3.02289	3.70373	0.680839
3110043O21Rik	5.52077	13.2616	2.46618	3.72973	1.26355
3110052M02Rik	0.516825	0.885609	-0.938362	-0.167136	0.771226
3830408C21Rik	0.162268	0.236863	-2.57977	-2.04774	0.532029
4632427E13Rik	0.692054	1.1696	-0.520658	0.23217	0.752827
4632428C04Rik	0.102966	0.200166	-3.21135	-2.28514	0.926215
4732490B19Rik	0	0.0198551	-7.64386	-5.33031	2.31354
4833419F23Rik	0	0.0664739	-7.64386	-3.80644	3.83742
4921506M07Rik	0.611119	0.875961	-0.698719	-0.18285	0.515869
4921507P07Rik	0.408556	0.77346	-1.27385	-0.361305	0.91254
4921513I03Rik	0.13361	0.195253	-2.8509	-2.3201	0.530793
4921524J17Rik	4.97476	9.5136	2.31608	3.25075	0.934673
4930405A10Rik	0	0.0581814	-7.64386	-3.98436	3.6595
4930405A21Rik	0.116015	0.170296	-3.04674	-2.51214	0.534607
4930412O13Rik	0.0954985	0.139021	-3.31475	-2.79565	0.519105
4930414N06Rik	0.113281	0.559841	-3.07971	-0.824083	2.25563
4930415O20Rik	0	0.125901	-7.64386	-2.93345	4.7104
4930432K21Rik	0.716033	1.03932	-0.471863	0.0625638	0.534427
4930443O20Rik	0.0369946	0.0721304	-4.57365	-3.69656	0.877096
4930447M23Rik	0	0.0208649	-7.64386	-5.27286	2.371
4930451G09Rik	0.185513	0.336025	-2.39204	-1.55205	0.839988
4930452N14Rik	0	0.222257	-7.64386	-2.1376	5.50625
4930455G09Rik	0.757423	1.70964	-0.391336	0.777906	1.16924
4930461G14Rik	9.01116	14.5723	3.17251	3.86565	0.693139
4930467D21Rik	0	0.0159349	-7.64386	-5.57795	2.06591
4930471G03Rik	0	0.097467	-7.64386	-3.28677	4.35709
4930473A02Rik	0.0380586	0.111292	-4.53755	-3.10418	1.43338
4930478L05Rik	0	0.0266025	-7.64386	-4.98382	2.66004
4930483K19Rik	0.443882	0.779955	-1.15559	-0.349318	0.806274
4930483O08Rik	0	0.054329	-7.64386	-4.07512	3.56874
4930503B20Rik	0	0.0554162	-7.64386	-4.04892	3.59494
4930509E16Rik	0	0.0907439	-7.64386	-3.38468	4.25918
4930511A08Rik	0.241138	0.972403	-2.02246	-0.0329746	1.98949
4930513D17Rik	0	0.0448666	-7.64386	-4.32578	3.31807
4930538K18Rik	0.0352557	0.0687183	-4.63466	-3.76183	0.87283
4930539E08Rik	0	0.0202339	-7.64386	-5.30849	2.33536
4930539J05Rik	4.3625	7.13537	2.12681	2.836	0.709191
4930544M13Rik	0	0.0369988	-7.64386	-4.57351	3.07035
4930548H24Rik	0	0.146164	-7.64386	-2.72581	4.91804
4930550C14Rik	0	0.303316	-7.64386	-1.69752	5.94634
4930552P12Rik	0	0.01942	-7.64386	-5.35579	2.28806
4930554I06Rik	0	0.118217	-7.64386	-3.02073	4.62313
4930556M19Rik	2.2291	3.94353	1.15969	1.98132	0.821622
4930556N13Rik	0	0.0540639	-7.64386	-4.08158	3.56228
4930557F10Rik	0	0.108127	-7.64386	-3.14398	4.49987
4930557K07Rik	0	0.573272	-7.64386	-0.79018	6.85368
4930570G19Rik	0	0.0152284	-7.64386	-5.62747	2.01638
4930572O03Rik	0	0.0465151	-7.64386	-4.27886	3.365
4930579K19Rik	0.193511	0.330815	-2.33271	-1.57426	0.758448
4931429L15Rik	0	0.0243109	-7.64386	-5.09242	2.55144
4931431C16Rik	0	0.0703144	-7.64386	-3.73093	3.91293
4932441J04Rik	0	0.0866146	-7.64386	-3.44828	4.19558
4933400A11Rik	0	0.0436295	-7.64386	-4.36202	3.28183
4933406F09Rik	0	0.041081	-7.64386	-4.43968	3.20417
4933406J10Rik	0	0.0575019	-7.64386	-3.99996	3.6439
4933411K16Rik	0.191475	0.485443	-2.34758	-1.02784	1.31974
4933412O06Rik	0	0.0487678	-7.64386	-4.21711	3.42674
4933417E11Rik	0	0.0504331	-7.64386	-4.17311	3.47075
4933422A05Rik	0.0397939	0.0776276	-4.48055	-3.59723	0.883321
4933427E11Rik	0.0908026	0.177312	-3.38379	-2.45552	0.928273
4933427G17Rik	0	0.0531093	-7.64386	-4.10509	3.53877
4933433G15Rik	0	0.094418	-7.64386	-3.33035	4.31351
4933433H22Rik	0	0.11256	-7.64386	-3.08853	4.55533
4933439K11Rik	0	0.182953	-7.64386	-2.41156	5.2323
5031410I06Rik	0.0166935	0.0324296	-5.52659	-4.73968	0.786917
5033403F01Rik	0.0393173	0.115039	-4.49599	-3.05842	1.43756
5033406O09Rik	0.871342	2.22336	-0.190434	1.15598	1.34642
5330417C22Rik	0.0146655	0.0427192	-5.66819	-4.38929	1.2789
5430402O13Rik	0.0571381	0.122129	-4.00838	-2.97563	1.03274
5430403N17Rik	0	0.05684	-7.64386	-4.01532	3.62854
5430419D17Rik	0	0.0163283	-7.64386	-5.55109	2.09277
5430434I15Rik	0.0435433	0.127499	-4.36458	-2.91595	1.44864
5730409E04Rik	1.79792	2.63442	0.850335	1.40022	0.549886
5730420D15Rik	0	0.0938952	-7.64386	-3.33796	4.3059
5830416P10Rik	2.6539	4.36309	1.41083	2.127	0.716173
5830444B04Rik	0	0.0173582	-7.64386	-5.48305	2.1608
5830473C10Rik	0	0.0437273	-7.64386	-4.35913	3.28473
6030408B16Rik	0	0.101128	-7.64386	-3.23612	4.40773
6030419C18Rik	2.50928	4.55844	1.33015	2.19012	0.859976
6030440G07Rik	0	0.0504331	-7.64386	-4.17311	3.47075
6330407A03Rik	0	0.163241	-7.64386	-2.5714	5.07246
6330409D20Rik	0	0.0980789	-7.64386	-3.27818	4.36568
6330416G13Rik	0.962161	2.02368	-0.048172	1.02054	1.06871
6330418K02Rik	1.11228	1.68296	0.159991	0.755281	0.59529
6430550D23Rik	0.109806	0.293863	-3.12273	-1.74244	1.38029
6430571L13Rik	0	0.0379095	-7.64386	-4.54256	3.1013
6820408C15Rik	0	0.0903625	-7.64386	-3.39043	4.25342
8430429K09Rik	1.69017	2.76803	0.76143	1.47146	0.710033
9030612E09Rik	0.0550991	0.0804353	-4.05651	-3.54902	0.507489
9130008F23Rik	4.00653	5.76476	2.00415	2.52851	0.524359
9130019O22Rik	2.91581	5.51495	1.54637	2.46466	0.918287
9130023H24Rik	1.4642	2.32952	0.555031	1.22313	0.668095
9130209A04Rik	0	0.191981	-7.64386	-2.34387	5.29998
9130409J20Rik	0.211635	0.557667	-2.20666	-0.829647	1.37702
9230112J17Rik	0.0430222	0.198377	-4.38015	-2.29777	2.08238
9330102E08Rik	0.251337	0.414712	-1.96389	-1.25253	0.711358
9330162012Rik	0.0362616	0.0706918	-4.59906	-3.72372	0.875337
9330175E14Rik	0	0.10043	-7.64386	-3.24564	4.39821
9430078K24Rik	0.0472779	0.0923516	-4.25766	-3.36065	0.897004
9530052E02Rik	0	0.119824	-7.64386	-3.00203	4.64182
9530080O11Rik	0.0718963	0.140154	-3.70094	-2.78434	0.916598
9630013A20Rik	0	0.02406	-7.64386	-5.10482	2.53903
9630028B13Rik	0.0142989	0.0277656	-5.69534	-4.93167	0.763663
9930014A18Rik	3.19653	4.74124	1.67876	2.24679	0.568024
9930111J21Rik1	0.732005	1.20802	-0.440254	0.278603	0.718857
9930111J21Rik2	0	0.080981	-7.64386	-3.53984	4.10402
A230050P20Rik	0.0619644	0.0905134	-3.90046	-3.38815	0.512309
A230108P19Rik	0	0.019386	-7.64386	-5.3578	2.28605
A330023F24Rik	0.119225	0.338053	-3.00897	-1.5435	1.46548
A330032B11Rik	0.026715	0.103975	-4.97869	-3.19793	1.78076
A330041J22Rik	0	0.0272239	-7.64386	-4.95573	2.68813
A330049N07Rik	0	0.0749054	-7.64386	-3.64556	3.99829
A330076H08Rik	0.0280736	0.163946	-4.91818	-2.56537	2.35281
A430005L14Rik	9.50249	14.9107	3.24906	3.89876	0.649695
A430046D13Rik	0.527616	0.825799	-0.908832	-0.267429	0.641404
A430090L17Rik	0	0.0127594	-7.64386	-5.81527	1.82858
A530013C23Rik	0.0475822	0.138845	-4.24928	-2.79741	1.45187
A530046M15Rik	0	0.10043	-7.64386	-3.24564	4.39821
A630077J23Rik	0	0.11934	-7.64386	-3.00764	4.63622
A630095N17Rik	0.103553	0.204354	-3.20353	-2.25598	0.947545
A830052D11Rik	0	0.0967899	-7.64386	-3.29633	4.34752
A930007I19Rik	0	0.0210733	-7.64386	-5.26128	2.38257
A930015D03Rik	1.23502	2.72876	0.310363	1.45089	1.14052
A930016O22Rik	0.0427025	0.103785	-4.38979	-3.20045	1.18934
A930019D19Rik	0	0.0595899	-7.64386	-3.95255	3.69131
A930024E05Rik	0.434256	1.05649	-1.18687	0.0860908	1.27296
AA413626	0.457059	0.689747	-1.11385	-0.52544	0.588411
AA414768	6.69365	14.8043	2.74387	3.88843	1.14456
AA467197	5.06231	9.26465	2.34122	3.21251	0.871295
AA543186	0.153559	0.269158	-2.65691	-1.86692	0.789988
AB124611	0.0452622	0.13258	-4.31438	-2.86166	1.45273
AF067061	0.203424	0.731213	-2.26241	-0.441805	1.8206
AF067063	0.134618	0.395874	-2.84044	-1.31878	1.52166
AF366264	0	0.050263	-7.64386	-4.17754	3.46631
AI115009	0.0277838	0.108163	-4.93087	-3.14353	1.78735
AI317395	0.111017	0.233714	-3.10759	-2.06664	1.04095
AI507597	0	0.204641	-7.64386	-2.25401	5.38985
AI593442	0	0.00816269	-7.64386	-6.2474	1.39645
AI607873	0.68418	2.83315	-0.537047	1.50495	2.042
AI662270	0	0.111368	-7.64386	-3.10323	4.54062
AI839979	0.0946536	0.277344	-3.32693	-1.82447	1.50246
AU040320	10.0564	15.1326	3.33076	3.92006	0.589305
AW112010	1.44803	2.37133	0.539064	1.24874	0.709671
AW209491	6.61466	9.92948	2.72676	3.31244	0.585687
AW549877	10.7587	15.5682	3.4281	3.96099	0.532891
AY074887	0.279118	0.549764	-1.81544	-0.850054	0.965384
AY512931	0.125422	0.182876	-2.93874	-2.41215	0.526594
Aard	0.0400728	0.0781755	-4.4716	-3.5877	0.883902
Aars	78.9418	188.873	6.30281	7.56131	1.2585
Aatk	0.0275945	0.115997	-4.93923	-3.04696	1.89227
Abca12	0.0112736	0.213108	-5.94132	-2.19689	3.74444
Abca16	0	0.0100632	-7.64386	-6.05283	1.59103
Abca8b	0.122584	0.468074	-2.97048	-1.07986	1.89062
Abcb11	0.19516	0.331322	-2.32077	-1.57208	0.748689
Abcb6	7.93658	11.474	2.98943	3.52093	0.531499
Abcb9	0.424212	1.71859	-1.22024	0.785417	2.00565
Abcc2	0.247181	0.753509	-1.98747	-0.398762	1.58871
Abcc8	0.106049	0.196401	-3.17073	-2.31186	0.858874
Abcc9	0.00641941	0.0124548	-6.45237	-5.84023	0.612136
Abhd11os	0.310564	0.618337	-1.664	-0.681916	0.98208
Abhd3	0.244996	0.423859	-2.00002	-1.22142	0.778598
Abhd4	8.23778	15.0729	3.04313	3.91436	0.871233
Abhd5	4.71253	6.72118	2.23803	2.74979	0.511756
Abi3	1.32755	2.99851	0.41419	1.58665	1.17246
Ablim2	0.0423495	0.119585	-4.40051	-3.0048	1.39571
Abtb1	4.9204	8.03396	2.30024	3.00701	0.706768
Abtb2	3.22769	7.90561	1.69274	2.98379	1.29105
Acad12	0.443025	0.717767	-1.15835	-0.468397	0.689951
Acbd7	0	0.275909	-7.64386	-1.83183	5.81203
Ache	0.136968	0.244175	-2.81636	-2.00477	0.811594
Ackr4	0.0480913	0.0701609	-4.23538	-3.73387	0.501507
Acot10	0	0.0335018	-7.64386	-4.69893	2.94493
Acot13	25.9392	38.8043	4.69734	5.27833	0.58099
Acot2	1.26342	3.81973	0.343033	1.93536	1.59233
Acot4	0.0863771	0.398876	-3.45202	-1.30802	2.14401
Acot6	0.0566337	0.192936	-4.02014	-2.33689	1.68324
Acox2	0.142862	0.281833	-2.75768	-1.80172	0.95596
Acox3	3.37983	4.85525	1.75908	2.28103	0.521947
Acoxl	0	0.0167417	-7.64386	-5.52339	2.12046
Acpp	0.0546859	0.178344	-4.06647	-2.44738	1.61909
Acrbp	2.11269	3.09745	1.08249	1.63341	0.550917
Acsbg1	21.4804	31.2856	4.42528	4.96766	0.542373
Acss3	0.0475652	0.0693905	-4.24975	-3.74874	0.50101
Acta1	0.0358864	0.139928	-4.61224	-2.78659	1.82564
Actl10	0.106012	0.172196	-3.17121	-2.49658	0.67463
Actl7a	0.0352557	0.0687183	-4.63466	-3.76183	0.87283
Actl7b	0.0376646	0.0734456	-4.55082	-3.67216	0.878653
Actn2	0	0.0159982	-7.64386	-5.57359	2.07027
Actn3	0.0512015	0.132631	-4.15325	-2.86112	1.29212
Adam18	0	0.0412828	-7.64386	-4.43338	3.21048
Adam21	0.0169157	0.0821563	-5.51189	-3.52025	1.99164
Adam28	0.0971144	0.223017	-3.29174	-2.13279	1.15896
Adam32	0.0224173	0.0653948	-5.18877	-3.82839	1.36038
Adam4	0.344695	0.54454	-1.51583	-0.863704	0.652127
Adamts17	0	0.0228604	-7.64386	-5.16564	2.47822
Adamtsl5	6.60228	12.4889	2.72406	3.64315	0.919095
Adar	10.1581	15.7666	3.34527	3.97926	0.633988
Adgrf1	0	0.0134692	-7.64386	-5.75873	1.88512
Adgrf2	0.0446115	0.101075	-4.33318	-3.23684	1.09634
Adgrg5	0	0.0510943	-7.64386	-4.156	3.48785
Adh7	3.12715	6.05963	1.64715	2.60042	0.953266
Adm	1.20736	2.50681	0.277818	1.32873	1.05091
Adm2	3.96436	60.4144	1.98891	5.91694	3.92803
Adora1	1.04009	1.61015	0.0636272	0.691668	0.628041
Adora2b	0.167619	0.435043	-2.53434	-1.18428	1.35005
Adprm	3.70081	6.72829	1.88979	2.75131	0.861523
Adra1a	0	0.040233	-7.64386	-4.46648	3.17738
Adrbk2	0	0.0279133	-7.64386	-4.92519	2.71867
Afp	5.16006	7.93091	2.36879	2.9884	0.619611
Ago4	0.0507176	0.238872	-4.16572	-2.0358	2.12992
Agpat9	5.67038	10.6836	2.50472	3.418	0.913284
Agtr1a	0	0.0214094	-7.64386	-5.2428	2.40105
Agtrap	5.62521	8.03081	2.49319	3.00644	0.513255
Aif1	0.136833	0.268311	-2.81773	-1.87138	0.94635
Aig1	5.6129	10.0802	2.49003	3.33417	0.844137
Aim2	10.0899	15.2808	3.33555	3.93412	0.598565
Aipl1	0.167747	0.326863	-2.53327	-1.59134	0.941927
Aire	0	0.0307055	-7.64386	-4.80771	2.83615
Akap17b	0.823229	1.40267	-0.271898	0.493309	0.765208
Akap3	0	0.0150781	-7.64386	-5.63823	2.00562
Akap4	0	0.0167861	-7.64386	-5.52045	2.12341
Akap6	0.0272967	0.110234	-4.95247	-3.11736	1.83511
Akap8l	11.7463	18.6052	3.55475	4.21802	0.663273
Akirin1	15.6263	24.1523	3.96637	4.59439	0.628021
Akirin2	31.1825	49.298	4.9629	5.6236	0.660708
Aknad1	0	0.0185501	-7.64386	-5.40812	2.23573
Akr1b10	4.15296	6.09625	2.05588	2.6091	0.553229
Akr1b7	0.087839	0.171479	-3.42913	-2.50243	0.926694
Akr1b8	140.833	241.476	7.13789	7.91577	0.777873
Akr1c12	10.6262	15.9091	3.41023	3.99223	0.582001
Akr1c13	19.5814	31.1773	4.29178	4.96266	0.670875
Akr1c18	0.521134	3.70178	-0.926498	1.89017	2.81666
Alas2	0.0794327	0.154592	-3.56605	-2.64754	0.918515
Alb	0.0996388	0.193849	-3.25651	-2.33025	0.926255
Aldh18a1	41.5326	101.284	5.37635	6.66233	1.28599
Aldh1a1	1.62889	2.43777	0.708311	1.28852	0.580207
Aldh1a3	4.99968	19.9037	2.32328	4.31533	1.99205
Aldh1a7	0.0987251	0.696229	-3.26916	-0.512042	2.75712
Aldh1b1	0.0654938	0.148573	-3.82636	-2.703	1.12336
Aldh1l2	2.03476	15.0243	1.0284	3.90971	2.88131
Aldh3b2	0.280872	0.569055	-1.80656	-0.800739	1.00582
Aldh3b3	0.0510422	0.273114	-4.15734	-1.84625	2.31109
Aldoart1	0.0247882	0.0482248	-5.06912	-4.23176	0.837358
Aldoart2	0	0.0299874	-7.64386	-4.83702	2.80684
Aldob	0.157159	0.229369	-2.62452	-2.09315	0.531373
Aldoc	3.12824	5.55489	1.64766	2.47506	0.827401
Alkbh4	3.97786	6.2091	1.9938	2.63555	0.641741
Allc	0	0.0356015	-7.64386	-4.62232	3.02153
Alms1-ps2	0.0474741	0.0927382	-4.25225	-3.35493	0.897317
Alox12	0.0164298	0.0319157	-5.54424	-4.75962	0.784616
Alox15	0	0.020144	-7.64386	-5.31364	2.33021
Alox5ap	0.0620952	0.332503	-3.89765	-1.56703	2.33062
Aloxe3	0.156973	0.457656	-2.62617	-1.11199	1.51419
Alpk3	0	0.0215975	-7.64386	-5.23257	2.41129
Alx4	0.00915649	0.0177637	-6.14239	-5.45712	0.685271
Amdhd1	0.0619747	0.120481	-3.90024	-2.99446	0.905781
Amdhd2	22.7537	38.7878	4.50835	5.27772	0.769371
Amer2	0.471734	0.926878	-1.06874	-0.101787	0.966957
Amhr2	1.49816	2.25049	0.587999	1.17344	0.585442
Amn1	4.73838	7.68868	2.24592	2.94367	0.697758
Ampd1	0.0214224	0.0624771	-5.24209	-3.88946	1.35264
Ampd3	6.41888	12.0234	2.68344	3.58837	0.904928
Amz1	0.18458	1.07606	-2.39912	0.112447	2.51157
Ang	3.56742	5.12432	1.8369	2.35877	0.521866
Angpt2	1.678	5.86699	0.751035	2.55385	1.80281
Angptl6	0.606558	2.16688	-0.709439	1.11894	1.82838
Ankef1	0.109076	0.176627	-3.13193	-2.46095	0.670983
Ankrd33b	0.0251702	0.0912487	-5.05073	-3.37709	1.67364
Ankrd53	0	0.0582021	-7.64386	-3.98388	3.65997
Ankrd63	0.0196585	0.047678	-5.34177	-4.24666	1.09512
Ankzf1	7.88725	11.2931	2.98044	3.49801	0.517572
Ano3	0	0.00762406	-7.64386	-6.30768	1.33618
Anpep	1.16631	5.55132	0.228123	2.47413	2.24601
Anxa11	29.495	46.3082	4.88264	5.53335	0.650708
Anxa7	44.2905	63.5867	5.46909	5.99077	0.521678
Aoc1	0	0.0180139	-7.64386	-5.44135	2.20251
Aox2	0	0.0194266	-7.64386	-5.3554	2.28845
Ap5z1	5.85412	8.86756	2.55068	3.14935	0.598666
Apba3	17.7162	26.4084	4.1474	4.7232	0.575794
Apbb1ip	0.0196049	0.0952629	-5.34491	-3.31814	2.02677
Aph1c	0.174602	0.311991	-2.47712	-1.65749	0.819638
Apoa5	0	0.0210333	-7.64386	-5.2635	2.38036
Apobec1	1.41372	3.04337	0.50459	1.60804	1.10345
Apobr	36.0736	57.5487	5.17307	5.84684	0.673765
Apoc4	0	0.436732	-7.64386	-1.17876	6.4651
Apol6	0	0.0486217	-7.64386	-4.22104	3.42282
Apol7a	1.82328	2.66697	0.870487	1.4179	0.547417
Apol7b	0	0.0440315	-7.64386	-4.35015	3.29371
Apom	0	0.177034	-7.64386	-2.45772	5.18614
Appbp2os	0.105465	1.24917	-3.17834	0.326733	3.50507
Aptx	1.15797	2.1876	0.217814	1.13264	0.914829
Aqp3	2.17486	3.71962	1.12424	1.89709	0.772858
Aqp9	0	0.594625	-7.64386	-0.737868	6.90599
Areg	28.7124	104.858	4.84385	6.71236	1.86851
Arfgap3	10.1494	19.6509	3.34403	4.29689	0.952857
Arfgef3	0.00571212	0.0276869	-6.54461	-4.93514	1.60947
Arg2	0.113367	0.810589	-3.07866	-0.294086	2.78458
Arhgap28	0.0179115	0.0434342	-5.44778	-4.36783	1.07995
Arhgap4	0.0599692	0.116456	-3.9441	-3.04149	0.902606
Arhgap6	3.97471	6.10973	1.99266	2.61229	0.619625
Arhgap9	0	0.111008	-7.64386	-3.1077	4.53615
Arhgdig	2.27173	3.57694	1.18696	1.84074	0.653778
Arhgef19	4.60288	6.58514	2.2041	2.72031	0.516206
Arhgef25	2.70923	5.91648	1.44054	2.56596	1.12541
Arid3a	1.1419	1.84229	0.19774	0.88541	0.687671
Arid3b	0.893421	1.68482	-0.154536	0.75687	0.911406
Arid5a	2.78697	9.34012	1.48128	3.22421	1.74293
Arl11	0.0358636	0.209733	-4.61304	-2.21938	2.39366
Arl14ep	11.7858	29.6892	3.55959	4.89211	1.33252
Arl4d	2.91855	5.19908	1.54772	2.37964	0.831922
Arl5c	0.101317	0.493571	-3.23356	-1.00413	2.22943
Arl8a	34.504	58.5886	5.1089	5.87267	0.76377
Armc2	0.0196416	0.0381096	-5.34276	-4.53585	0.806913
Armcx3	0.964353	2.79495	-0.044906	1.4854	1.53031
Armcx5	2.32182	3.63152	1.21836	1.86256	0.644199
Arntl	5.36824	14.5245	2.42579	3.86091	1.43512
Arntl2	2.36251	4.03368	1.24337	2.01388	0.770513
Arrdc4	5.80035	10.8879	2.53738	3.44532	0.907933
Arsa	11.5052	17.6741	3.52484	4.14397	0.619132
Art2a-ps	0	0.0682124	-7.64386	-3.77177	3.87209
Artn	0.0927667	0.882571	-3.35451	-0.172066	3.18245
Arvcf	2.10825	3.12817	1.07946	1.64762	0.56816
Asap3	0.587255	0.89151	-0.75571	-0.157608	0.598101
Asb8	14.5438	22.3895	3.86283	4.48507	0.622244
Asgr1	0.92112	1.74133	-0.110729	0.804326	0.915055
Asic3	0.0263592	0.102591	-4.99497	-3.21637	1.7786
Asl	27.9482	39.9413	4.80494	5.31999	0.515048
Asmt	0.0464617	0.181488	-4.28036	-2.42285	1.85751
Asns	50.9976	267.831	5.6725	8.06521	2.39271
Asphd1	0	0.145573	-7.64386	-2.73146	4.91239
Asphd2	0.0331363	0.161407	-4.71269	-2.58721	2.12548
Asprv1	0.0345371	0.134618	-4.66065	-2.84044	1.82021
Atad3aos	0.331884	0.524048	-1.56968	-0.918529	0.651147
Atcay	0	0.0127963	-7.64386	-5.81228	1.83158
Atf3	2.68869	21.3044	1.42958	4.41342	2.98383
Atf4	144.922	446.393	7.17918	8.80219	1.623
Atf5	11.8701	53.1203	3.56987	5.73133	2.16146
Atg101	47.9095	69.5454	5.58239	6.11999	0.537596
Atg12	8.54707	12.8397	3.09627	3.6831	0.586828
Atp12a	0	0.0118579	-7.64386	-5.89043	1.75342
Atp13a4	0.0849878	0.322854	-3.47413	-1.60887	1.86525
Atp1a3	0.0404683	0.0654751	-4.459	-3.82674	0.632253
Atp1a4	0	0.0135475	-7.64386	-5.75263	1.89122
Atp1b4	0	0.0109199	-7.64386	-5.97302	1.67083
Atp4a	0.125131	0.256461	-2.94196	-1.93533	1.00663
Atp6v0a1	40.3754	71.8647	5.33558	6.16731	0.831728
Atp6v0b	98.5456	143.205	6.62279	7.16199	0.539196
Atp6v0d1	23.1562	40.8471	4.53364	5.35234	0.8187
Atp6v1b2	33.6998	50.7166	5.07488	5.66453	0.589646
Atp6v1d	32.1554	54.9239	5.00721	5.77949	0.77228
Atp6v1f	135.819	198.656	7.08559	7.63416	0.54857
Atp6v1g1	78.6847	118.417	6.2981	6.88779	0.58969
Aurkc	0	0.0472566	-7.64386	-4.25824	3.38561
Avil	0.323713	0.754562	-1.6051	-0.39676	1.20834
Avpi1	84.4631	123.868	6.40033	6.95272	0.552383
Avpr1b	0	0.011264	-7.64386	-5.94217	1.70168
B020031M17Rik	0.381941	1.12243	-1.36981	0.173038	1.54285
B230209E15Rik	0	0.144204	-7.64386	-2.74464	4.89921
B230307C23Rik	1.45074	2.14556	0.541753	1.10471	0.56296
B3galt5	0	0.0094269	-7.64386	-6.11509	1.52876
B3gnt2	20.9685	38.4461	4.3905	5.26495	0.874457
B3gnt4	0.0752054	0.109986	-3.64016	-3.12047	0.519687
B3gnt6	0.0211745	0.0617515	-5.25569	-3.90506	1.35064
B430319G15Rik	0.28427	0.54026	-1.78951	-0.874984	0.914528
B4galnt4	1.70463	2.4219	0.773684	1.27911	0.505431
B4galt7	18.7654	29.2489	4.23039	4.87056	0.64017
B830017H08Rik	0	0.0489835	-7.64386	-4.21134	3.43252
BB557941	0	0.050091	-7.64386	-4.18204	3.46182
BC016579	0.0691218	0.179243	-3.75396	-2.44032	1.31364
BC021614	0.195201	1.73158	-2.32048	0.796249	3.11673
BC022687	4.177	8.65025	2.06419	3.11358	1.04938
BC031361	0.149041	0.267011	-2.69861	-1.87826	0.820351
BC048546	0.0509297	0.118587	-4.16024	-3.0164	1.14384
BC048609	0	0.411327	-7.64386	-1.26421	6.37965
BC089597	0.0432143	0.0843519	-4.3744	-3.48436	0.890037
BC147527	0	0.0307149	-7.64386	-4.80733	2.83653
Bach2os	0	0.03063	-7.64386	-4.81076	2.83309
Bag3	33.1057	47.3339	5.04923	5.56495	0.515729
Bag5	10.4795	15.0571	3.39019	3.91285	0.522665
Bahd1	14.5438	21.9354	3.86283	4.45552	0.59269
Baiap2l2	0.441405	0.739437	-1.16357	-0.425778	0.737797
Barhl1	0	0.0278953	-7.64386	-4.92597	2.71788
Bbc3	2.92136	7.3949	1.54911	2.88751	1.3384
Bbs4	2.19386	3.76917	1.13676	1.91616	0.779404
Bcas3os1	0	0.075786	-7.64386	-3.62975	4.01411
Bcat1	1.01729	4.0435	0.0318045	2.01739	1.98558
Bcl11a	0	0.00751289	-7.64386	-6.32044	1.32342
Bcl2l10	0.0447792	0.131147	-4.32831	-2.87676	1.45155
Bcl2l15	57.2596	95.7697	5.83957	6.58157	0.742001
Bcl6	3.43285	9.06197	1.78151	3.18062	1.39911
Bcl6b	0.12789	0.220742	-2.9117	-2.14725	0.764442
Bco1	0	0.167788	-7.64386	-2.53293	5.11093
Bdh1	1.46183	2.76298	0.552702	1.46883	0.916132
Bdh2	0.25653	1.34334	-1.93495	0.431184	2.36614
Bdkrb2	4.65679	9.1001	2.22088	3.18667	0.965791
Becn2	0.0289073	0.05628	-4.88226	-4.02844	0.85382
Bend5	0.0282411	0.0549819	-4.91089	-4.05933	0.851559
Bend6	0.0658078	0.127962	-3.81995	-2.91091	0.909034
Bet1l	7.4116	11.2629	2.89076	3.49415	0.603389
Bex2	0.0657613	0.128887	-3.8209	-2.90091	0.919983
Bex4	0.0794678	0.156139	-3.56545	-2.63362	0.931832
Bglap3	1.16086	2.04624	0.221395	1.0365	0.815102
Bhlhe23	0	0.0192179	-7.64386	-5.36778	2.27607
Bhlhe40	43.8679	71.8449	5.45526	6.16691	0.711656
Bhlhe41	2.31347	5.12269	1.21317	2.35831	1.14514
Bid	16.9732	24.0759	4.08561	4.58982	0.504206
Bik	0.248406	0.425718	-1.98048	-1.21518	0.765293
Blnk	5.85598	10.3323	2.55114	3.36979	0.818646
Bloc1s3	6.83027	10.4782	2.773	3.39001	0.617009
Blvrb	4.30621	12.0553	2.10809	3.59219	1.4841
Blzf1	4.24553	7.23016	2.08764	2.85502	0.767382
Bmf	1.16791	1.96542	0.230092	0.978503	0.748411
Bnip3	48.4764	75.8224	5.59936	6.24465	0.645288
Brdt	0.193017	0.315388	-2.3363	-1.64211	0.694196
Brf2	7.65953	11.7164	2.9382	3.55107	0.612876
Bri3	62.7578	101.251	5.97184	6.66186	0.690026
Brox	19.2036	27.9661	4.26368	4.80587	0.542185
Bsdc1	6.90186	12.4701	2.78803	3.64098	0.852949
Btbd10	14.5213	23.0542	3.8606	4.52727	0.666675
Btc	2.98192	6.52575	1.57866	2.70725	1.12859
Btg1	30.9099	61.7075	4.95023	5.94749	0.99726
Btg2	2.27432	7.64578	1.1886	2.93561	1.747
Btg3	6.53665	12.0025	2.70965	3.58586	0.876209
Btnl4	0	0.0286495	-7.64386	-4.89327	2.75059
Bud31	38.8953	62.7729	5.28171	5.97218	0.690475
Bvht	0.347566	0.572823	-1.50403	-0.7913	0.712734
C1ql3	0.263058	0.390701	-1.89938	-1.33752	0.561866
C1qtnf4	0.157939	0.539143	-2.6176	-0.877942	1.73965
C1s2	0.0186309	0.0362058	-5.40318	-4.60101	0.802173
C230037L18Rik	0.0687247	0.269535	-3.76171	-1.86494	1.89677
C2cd4c	0.0213937	0.0553278	-5.24366	-4.05103	1.19263
C330021F23Rik	0.09702	0.189006	-3.29308	-2.36583	0.927249
C330022C24Rik	0.0525446	0.205475	-4.11918	-2.24828	1.8709
C4bp-ps1	0.08353	0.246362	-3.49769	-1.99216	1.50553
C730002L08Rik	0	0.0163948	-7.64386	-5.5466	2.09726
C920009B18Rik	0.0743301	0.144239	-3.65599	-2.7443	0.911684
C920021L13Rik	0.0301056	0.0586257	-4.83216	-3.97425	0.857908
Cabp1	0	1.00851	-7.64386	0.0193603	7.66322
Cabyr	0	0.073412	-7.64386	-3.67278	3.97107
Cacna1b	0.0581148	0.0973742	-3.98588	-3.28808	0.697802
Cacna2d3	0	0.0127301	-7.64386	-5.81766	1.8262
Cacna2d4	0	0.0158566	-7.64386	-5.58335	2.0605
Cacnb1	1.27688	1.89084	0.358261	0.922837	0.564576
Cacng4	0	0.0575766	-7.64386	-3.99823	3.64562
Cadm4	11.246	16.1655	3.49198	4.01529	0.523311
Cadps	0.121504	0.218864	-2.98275	-2.15931	0.82344
Cahm	0.494993	1.05438	-1.00002	0.0832202	1.08324
Calcoco1	17.7051	39.0009	4.1465	5.28562	1.13912
Calcoco2	0	0.0488361	-7.64386	-4.21528	3.42857
Calcrl	0.151507	0.450764	-2.6757	-1.13364	1.54206
Calhm2	0.148972	0.241518	-2.69926	-2.02024	0.679025
Calr4	0	0.0263145	-7.64386	-4.99703	2.64683
Caly	0	0.0423776	-7.64386	-4.39965	3.24421
Camk1	16.2851	34.5511	4.02592	5.11087	1.08494
Camk2n2	1.70127	2.94682	0.770846	1.5616	0.790759
Caml	25.4582	37.4853	4.67034	5.22845	0.558104
Capn3	0	0.0551867	-7.64386	-4.05441	3.58944
Capn6	0.0136708	0.0265431	-5.74307	-4.98653	0.756541
Caps2	0	0.0348119	-7.64386	-4.65066	2.9932
Car11	0.370845	0.903837	-1.41179	-0.137907	1.27388
Car14	0.386986	0.565411	-1.35113	-0.809926	0.5412
Car15	0.305446	0.646796	-1.68759	-0.617508	1.07008
Car6	0.039349	0.268637	-4.49495	-1.86966	2.62529
Car7	0	0.153798	-7.64386	-2.65474	4.98912
Car8	0.0165898	0.0402244	-5.53351	-4.46675	1.06675
Card14	2.75608	5.13671	1.46523	2.36225	0.897016
Carhsp1	26.4882	42.7512	4.72755	5.41806	0.690512
Carns1	0.498668	0.720056	-0.989455	-0.463836	0.525619
Cars	55.7641	138.506	5.80139	7.11386	1.31246
Cartpt	0	0.0712866	-7.64386	-3.71243	3.93143
Casp1	0.24509	0.580058	-1.99948	-0.773348	1.22613
Casp8	35.6021	53.0578	5.15409	5.72963	0.575536
Cass4	0.0133595	0.0648697	-5.76733	-3.83919	1.92814
Casz1	0.318401	0.656197	-1.6286	-0.596848	1.03176
Catsperd	0.368544	0.735148	-1.42065	-0.434114	0.986536
Catsperg1	0.0136179	0.0396602	-5.74717	-4.48487	1.2623
Cbfa2t3	0.024775	0.078078	-5.06975	-3.58939	1.48036
Cbr1	13.913	22.2422	3.79888	4.47555	0.676672
Cbr2	0	0.0549353	-7.64386	-4.06045	3.58341
Cbr3	1.42867	2.32576	0.519713	1.2208	0.701087
Cbr4	5.68926	11.021	2.50951	3.46284	0.953329
Cbs	0.629043	1.01604	-0.657347	0.0300394	0.687387
Cbx4	4.56542	7.16741	2.19233	2.84246	0.650131
Ccbl1	1.57149	2.46219	0.656716	1.30287	0.646153
Ccdc106	0.490842	0.719171	-1.01205	-0.465598	0.54645
Ccdc109b	15.8117	23.7828	3.98338	4.57215	0.588773
Ccdc129	0	0.0144346	-7.64386	-5.68523	1.95863
Ccdc130	3.11357	6.13773	1.64088	2.61888	0.977995
Ccdc136	3.35677	5.83528	1.74922	2.54604	0.796817
Ccdc146	0	0.0279143	-7.64386	-4.92514	2.71871
Ccdc148	0	0.0388034	-7.64386	-4.51281	3.13104
Ccdc150	0.0127065	0.0369996	-5.81958	-4.57348	1.2461
Ccdc159	0.345336	0.841335	-1.51319	-0.240699	1.27249
Ccdc160	0	0.0670544	-7.64386	-3.79477	3.84909
Ccdc17	0.101857	0.272503	-3.22625	-1.84942	1.37682
Ccdc174	9.32319	17.4066	3.2216	4.12198	0.90038
Ccdc180	0.00938565	0.0273136	-6.11923	-4.95171	1.16751
Ccdc181	7.90641	12.4369	2.98393	3.63713	0.6532
Ccdc184	0.172429	0.314306	-2.49469	-1.64699	0.847698
Ccdc22	22.9685	33.1622	4.5219	5.05169	0.529787
Ccdc28a	2.86032	5.3083	1.5187	2.40961	0.890912
Ccdc33	0.0157402	0.0567907	-5.59143	-4.01647	1.57496
Ccdc40	0.0479312	0.0929944	-4.23974	-3.35116	0.888581
Ccdc64	3.88973	5.65154	1.96152	2.49992	0.538397
Ccdc65	0.383385	0.586311	-1.36444	-0.758011	0.60643
Ccdc68	1.87349	2.87373	0.909573	1.52543	0.615859
Ccdc69	0.0754534	0.147135	-3.6357	-2.71658	0.919127
Ccdc71l	3.10522	5.9256	1.63702	2.56818	0.931161
Ccdc74a	0.0853802	0.291623	-3.46785	-1.7533	1.71455
Ccdc89	0.341002	0.538683	-1.53115	-0.879162	0.651985
Ccdc96	0.568904	0.815265	-0.801119	-0.285838	0.515281
Cck	10.6651	20.412	3.4155	4.3517	0.936197
Ccl5	0.140646	0.838056	-2.77946	-0.2463	2.53316
Ccl8	0.299521	0.893718	-1.71539	-0.15406	1.56133
Ccnb3	0	0.0102102	-7.64386	-6.03882	1.60504
Ccndbp1	15.1756	21.6064	3.92416	4.43372	0.509564
Ccng2	41.2181	73.6664	5.36538	6.20303	0.837652
Ccno	0	0.0266665	-7.64386	-4.9809	2.66296
Ccpg1os	1.18542	1.88521	0.251471	0.918547	0.667076
Ccr2	0.0405759	0.10504	-4.45559	-3.1839	1.27168
Ccr5	0	0.0163404	-7.64386	-5.55027	2.09359
Ccr7	0.13309	0.310823	-2.85632	-1.66281	1.19351
Ccr9	0	0.0215564	-7.64386	-5.2348	2.40906
Ccser1	0.0847852	0.123352	-3.47738	-2.96182	0.515556
Cct8l1	0	0.0253687	-7.64386	-5.04127	2.60259
Cd101	0.0301824	0.073271	-4.829	-3.67538	1.15362
Cd160	0.0406307	0.177732	-4.45385	-2.4522	2.00165
Cd164l2	0.117354	0.172282	-3.03087	-2.49588	0.534985
Cd177	0.0182446	0.0354526	-5.42696	-4.62762	0.799337
Cd247	0	0.0301096	-7.64386	-4.83199	2.81187
Cd274	0.333305	0.504739	-1.5636	-0.972169	0.591434
Cd28	0.0445201	0.259201	-4.33584	-1.92029	2.41555
Cd34	4.60035	9.52104	2.20331	3.25188	1.04857
Cd36	0	0.013904	-7.64386	-5.72516	1.91869
Cd3d	0.0407147	0.0794369	-4.4512	-3.56598	0.885215
Cd46	0.0908928	0.221861	-3.38243	-2.14012	1.24231
Cd53	0.264391	1.3185	-1.89223	0.404358	2.29658
Cd55	0.236678	0.728383	-2.04884	-0.447361	1.60148
Cd59a	0.148473	0.289108	-2.70394	-1.76558	0.938361
Cd68	3.08477	6.77997	1.6275	2.76234	1.13484
Cd79a	0	0.0398256	-7.64386	-4.47953	3.16432
Cd93	0.0640221	0.137954	-3.8568	-2.80638	1.05042
Cdc42ep5	40.4147	60.5055	5.33699	5.91911	0.582127
Cdh19	0	0.0312075	-7.64386	-4.78757	2.85629
Cdh22	0	0.0394249	-7.64386	-4.49249	3.15137
Cdh5	0	0.140974	-7.64386	-2.77622	4.86764
Cdh7	0	0.0141172	-7.64386	-5.70898	1.93487
Cdk17	14.4311	20.4444	3.85161	4.35399	0.502377
Cdk20	3.86744	5.74266	1.95324	2.52297	0.569732
Cdk3-ps	4.75989	7.564	2.25244	2.9201	0.66766
Cdk5r2	0.0732705	0.177975	-3.67539	-2.45028	1.22511
Cdk5rap1	5.47349	7.87447	2.45378	2.9781	0.52432
Cdkl4	0	0.0163103	-7.64386	-5.55231	2.09155
Cdkn1a	14.1522	39.6158	3.82346	5.30819	1.48472
Cdkn2a	206.405	325.343	7.68937	8.34584	0.656471
Cdkn2b	33.657	66.5812	5.07305	6.05715	0.984102
Cdnf	0.16301	0.237486	-2.57338	-2.04403	0.529354
Cdo1	0.380195	0.572562	-1.37634	-0.791952	0.584387
Cdr2l	8.45976	17.4787	3.08147	4.12794	1.04647
Cds1	0.123265	0.263198	-2.9628	-1.89863	1.06417
Ceacam1	6.00421	8.57904	2.58718	3.10166	0.514481
Ceacam10	0	0.106184	-7.64386	-3.16898	4.47488
Ceacam19	0.0580113	0.183058	-3.98825	-2.41075	1.5775
Ceacam2	0.0453247	0.0733594	-4.31259	-3.67375	0.63884
Ceacam20	0	0.0165293	-7.64386	-5.53755	2.1063
Cebpb	48.2033	131.95	5.59121	7.0439	1.45269
Cebpd	8.22048	14.8158	3.0401	3.88955	0.849452
Cecr2	0.0101596	0.0196954	-6.04362	-5.33961	0.704011
Celf4	4.44445	6.63624	2.15363	2.73145	0.577826
Celf5	0.524919	0.764007	-0.916156	-0.378931	0.537225
Celf6	0	0.0521155	-7.64386	-4.12997	3.51388
Cemip	0.158961	0.237607	-2.60858	-2.04331	0.565268
Cend1	0	0.0307149	-7.64386	-4.80733	2.83653
Cep83os	0.18633	0.40685	-2.38586	-1.27981	1.10606
Cercam	0.528882	0.797363	-0.905407	-0.317673	0.587734
Cers1	0.142557	0.233923	-2.76066	-2.06538	0.695273
Cers3	6.04076	9.30935	2.59592	3.21946	0.623531
Ces1b	0	0.0253108	-7.64386	-5.04402	2.59983
Cfap44	0.00717492	0.0139145	-6.35994	-5.72436	0.63558
Cfap45	0.0849505	0.440997	-3.47472	-1.16489	2.30983
Cfap46	0.00571355	0.022155	-6.54442	-5.20264	1.34178
Cfap53	0	0.0266646	-7.64386	-4.98099	2.66287
Cfap61	0	0.0658094	-7.64386	-3.81992	3.82394
Cfd	0	0.104708	-7.64386	-3.18826	4.4556
Chac1	4.26078	63.7382	2.09281	5.9942	3.90139
Chac2	7.18293	10.4062	2.84558	3.38006	0.534488
Chad	0.094874	0.215602	-3.32375	-2.18048	1.14326
Chchd10	5.36642	11.4764	2.4253	3.52123	1.09592
Chchd5	10.063	14.789	3.33171	3.88694	0.555235
Chd2	7.93885	13.1802	2.98984	3.72085	0.731009
Chd3os	1.39637	2.66207	0.486838	1.41526	0.928418
Chd5	0.557133	1.02746	-0.831017	0.0460859	0.877102
Chdh	0.0523051	0.0977649	-4.12519	-3.28258	0.842612
Chic2	11.6542	21.9874	3.5434	4.45893	0.915536
Chit1	0	0.0830364	-7.64386	-3.50576	4.1381
ChkbCpt1b	0.352354	0.753773	-1.48457	-0.39826	1.08631
Chmp1b	10.2625	17.8606	3.36001	4.15911	0.799099
Chrd	0.306502	0.463258	-1.68269	-1.09462	0.588062
Chrdl2	0.0359638	0.105187	-4.60951	-3.18197	1.42753
Chrm4	0.32148	0.468488	-1.61493	-1.0786	0.536333
Chrm5	0	0.0578601	-7.64386	-3.99171	3.65214
Chrna5	0	0.0175577	-7.64386	-5.47024	2.17362
Chrnb2	0.0530184	0.137163	-4.10735	-2.81438	1.29296
Chrnb4	0	0.0135433	-7.64386	-5.75296	1.8909
Chst10	0	0.0305092	-7.64386	-4.81566	2.82819
Chst4	0.0255068	0.173702	-5.03473	-2.48437	2.55035
Chst5	0	0.0257521	-7.64386	-5.02317	2.62068
Churc1	21.8816	35.3719	4.45198	5.14474	0.69276
Ciart	4.42616	15.2003	2.14768	3.9265	1.77882
Cib1	48.9057	71.1229	5.61208	6.15234	0.540265
Cib2	2.15919	3.48313	1.11383	1.80245	0.688627
Cidea	0	0.0933242	-7.64386	-3.34631	4.29755
Cidec	0.397627	1.04248	-1.31248	0.0669227	1.37941
Cir1	16.0513	25.9873	4.00507	4.70001	0.694945
Cish	1.24052	2.86804	0.316748	1.52258	1.20583
Cited2	75.1409	128.917	6.23162	7.01035	0.778732
Ciz1	21.0229	30.8688	4.39423	4.94831	0.554078
Clca2	0.0123165	0.0239078	-5.85171	-5.1124	0.739311
Clca4b	0	0.0159234	-7.64386	-5.57874	2.06512
Cldn1	2.27652	3.98199	1.19	1.9953	0.805305
Cldn22	0.116162	0.170514	-3.04499	-2.51034	0.534649
Cldn23	1.55778	3.22179	0.644115	1.6901	1.04598
Cldn4	106.745	202.092	6.73809	7.6589	0.920812
Clec10a	0	0.0344797	-7.64386	-4.66275	2.98111
Clec11a	0.0784448	0.178091	-3.58303	-2.44937	1.13367
Clec3b	0	0.227937	-7.64386	-2.10199	5.54187
Clec4a2	0	0.0202576	-7.64386	-5.30714	2.33672
Clec7a	0	0.0229597	-7.64386	-5.16051	2.48335
Clhc1	0.0700114	0.159513	-3.73675	-2.60373	1.13302
Clic3	0.771886	1.36438	-0.364225	0.453523	0.817748
Clk1	33.2428	48.0899	5.05519	5.58781	0.532625
Clmn	0.552336	0.823396	-0.843381	-0.271608	0.571773
Clmp	0.840195	1.20785	-0.242644	0.278401	0.521045
Cln3	13.4167	19.0861	3.7465	4.25483	0.508333
Clybl	1.37071	1.94229	0.460176	0.961468	0.501291
Cml1	0.682249	1.72437	-0.541095	0.790247	1.33134
Cndp2	38.866	61.1427	5.28062	5.93423	0.653604
Cnga2	0	0.015549	-7.64386	-5.60479	2.03907
Cngb1	0	0.0148272	-7.64386	-5.65638	1.98748
Cngb3	0	0.00986028	-7.64386	-6.07239	1.57146
Cnksr1	3.48092	5.11421	1.80154	2.35592	0.554382
Cnksr2	0.746338	1.33709	-0.412466	0.424481	0.836947
Cnppd1	17.15	44.7546	4.10056	5.48413	1.38357
Cnrip1	0	0.0334513	-7.64386	-4.70082	2.94303
Cntd1	0.271564	0.462101	-1.85431	-1.09819	0.756121
Coa4	6.70541	12.1578	2.7464	3.6044	0.858003
Col10a1	0.0156487	0.0303941	-5.59781	-4.82035	0.777458
Col14a1	0	0.0284317	-7.64386	-4.90264	2.74122
Col17a1	0.0175198	0.0339942	-5.47266	-4.6806	0.792066
Col19a1	0	0.00429023	-7.64386	-6.75007	0.893786
Col25a1	0	0.013552	-7.64386	-5.75228	1.89157
Col26a1	0	0.053371	-7.64386	-4.0986	3.54525
Col2a1	0	0.00939589	-7.64386	-6.1182	1.52566
Col9a3	0.0866613	0.134697	-3.44754	-2.83963	0.607916
Commd9	16.1523	24.4016	4.01411	4.6092	0.595085
Copz2	0.633046	0.992135	-0.648268	-0.00413925	0.644128
Coq10b	13.2803	21.3733	3.73176	4.41808	0.686316
Coro1a	0.125972	0.429414	-2.93267	-1.20286	1.72981
Coro1b	117.585	166.893	6.87762	7.38282	0.505201
Coro2b	0.551117	1.34402	-0.84654	0.431912	1.27845
Coro7	2.73255	4.25001	1.45289	2.08916	0.636277
Cox17	90.3325	130.022	6.49725	7.02267	0.525414
Cox6b2	0	0.908698	-7.64386	-0.130211	7.51365
Cpa2	0	0.0398973	-7.64386	-4.47723	3.16663
Cpa4	0.666035	1.17575	-0.57554	0.239704	0.815244
Cpeb1	0.0632986	0.184516	-3.872	-2.39961	1.47239
Cpeb2	1.98804	3.51505	0.994971	1.8156	0.820625
Cpeb4	3.36585	6.32079	1.75311	2.66125	0.908133
Cpn1	0.721769	1.26469	-0.460431	0.344476	0.804908
Cpne4	0.0132703	0.0257636	-5.77436	-5.02263	0.751724
Cpne7	0.0208086	0.0606803	-5.276	-3.9284	1.34761
Cpne9	0.0355672	0.120939	-4.62354	-2.9892	1.63434
Cps1	0	0.00828559	-7.64386	-6.23399	1.40986
Cpvl	0	0.0347334	-7.64386	-4.6535	2.99035
Cpxm1	0.0619747	0.160641	-3.90024	-2.59387	1.30637
Crabp1	0.0767999	0.150824	-3.61176	-2.68201	0.929746
Crabp2	0	0.258526	-7.64386	-1.92398	5.71987
Cracr2a	0	0.0503758	-7.64386	-4.1746	3.46926
Creb3l3	0.066093	0.428394	-3.81415	-1.20625	2.6079
Creb5	0.257351	1.93327	-1.93043	0.95477	2.8852
Crebl2	2.06204	3.91251	1.04757	1.96994	0.922371
Crebrf	1.63521	3.01156	0.713881	1.5929	0.879024
Creg1	14.8317	21.1503	3.8911	4.40295	0.511849
Creg2	0.00818072	0.0158679	-6.24543	-5.58257	0.662856
Crem	1.42079	2.16675	0.511762	1.11886	0.607097
Crhbp	0	0.151061	-7.64386	-2.67982	4.96404
Crisp1	0.113461	0.258129	-3.07752	-1.92616	1.15136
Crlf2	6.55162	10.8497	2.71295	3.44025	0.727296
Crmp1	0	0.032179	-7.64386	-4.74937	2.89449
Crnde	1.68383	2.40135	0.756024	1.26685	0.510822
Cry1	5.01534	7.97097	2.32779	2.99566	0.667875
Cryab	0.655551	1.07646	-0.598258	0.11298	0.711238
Cryge	0	0.207223	-7.64386	-2.23635	5.40751
Crygn	0	0.227372	-7.64386	-2.10549	5.53836
Cryzl1	15.2826	33.9681	3.93429	5.08632	1.15203
Csf2	16.6023	45.9563	4.05375	5.52235	1.4686
Csf2ra	1.16976	2.81913	0.232366	1.49781	1.26544
Csl	0	0.0254708	-7.64386	-5.03643	2.60743
Csrnp1	2.52312	4.88527	1.33806	2.28991	0.951849
Csrp1	25.5719	39.3645	4.67677	5.29901	0.622237
Cst6	0.256575	0.557322	-1.9347	-0.830532	1.10417
Csta1	0	0.0176065	-7.64386	-5.46712	2.17674
Cth	2.00828	8.68534	1.00955	3.11941	2.10986
Ctla2b	2.13242	4.19216	1.09587	2.06941	0.973543
Ctns	6.05414	8.97074	2.59911	3.16603	0.566918
Ctsa	62.462	90.3347	5.96502	6.49729	0.532266
Ctsf	0.620817	1.73652	-0.676187	0.800347	1.47653
Ctsk	0.0996978	0.259006	-3.2557	-1.92136	1.33434
Cttnbp2nl	8.99999	15.5489	3.17072	3.9592	0.78848
Cutal	3.71013	5.38935	1.89341	2.43145	0.538036
Cux2	0	0.00904505	-7.64386	-6.15379	1.49006
Cxcl1	224.039	384.48	7.80764	8.58678	0.779145
Cxcl11	0.0331553	0.096961	-4.71197	-3.29391	1.41806
Cxcl16	47.554	74.0529	5.57165	6.21058	0.638935
Cxcl2	6.31439	23.1092	2.65979	4.53071	1.87092
Cxcr3	0.0326166	0.0635443	-4.73249	-3.86682	0.865667
Cxcr4	0.227662	0.609404	-2.10369	-0.70274	1.40095
Cxcr6	0.0271655	0.0527929	-4.95834	-4.11296	0.845378
Cyb5r1	50.5627	71.8819	5.66014	6.16766	0.507513
Cyb5r2	0.0181617	0.105925	-5.43212	-3.17234	2.25977
Cyfip2	0	0.0071627	-7.64386	-6.36139	1.28246
Cygb	0	0.0209339	-7.64386	-5.26902	2.37484
Cyp27a1	0.461945	1.40152	-1.09868	0.49213	1.59081
Cyp27b1	0.0619747	0.220881	-3.90024	-2.14637	1.75387
Cyp2e1	0.0598176	0.174721	-3.94747	-2.47617	1.4713
Cyp2r1	0	0.0571234	-7.64386	-4.00872	3.63514
Cyp2t4	0	0.0341473	-7.64386	-4.67494	2.96891
Cyp39a1	3.78384	7.13729	1.92176	2.83639	0.91463
Cyp3a13	4.57736	7.42086	2.19609	2.89256	0.696467
Cyp4a12b	0	0.0203195	-7.64386	-5.30361	2.34025
Cyp4f13	2.25002	4.05611	1.17314	2.02187	0.848734
Cyp4f17	2.64655	4.4651	1.40684	2.16031	0.753471
Cyp4f40	0.0667075	0.162472	-3.80173	-2.57801	1.22372
Cyp4f41-ps	0.0504029	0.147767	-4.17389	-2.7106	1.4633
Cyp4v3	1.09185	1.76216	0.133366	0.821433	0.688066
Cyp51	70.713	115.551	6.14401	6.85245	0.708443
Cyp7b1	0	0.0454078	-7.64386	-4.31021	3.33365
Cyyr1	0	0.024351	-7.64386	-5.09045	2.55341
D17H6S53E	7.31665	11.914	2.87217	3.57519	0.703022
D330023K18Rik	0.895664	1.92999	-0.150939	0.952326	1.10327
D330050G23Rik	0	0.0296214	-7.64386	-4.85219	2.79166
D3Ertd254e	2.73714	4.22994	1.4553	2.08234	0.627039
D630024D03Rik	0	0.118068	-7.64386	-3.02247	4.62138
D630041G03Rik	0.0399733	0.0905413	-4.47479	-3.38773	1.08706
D6Ertd527e	0.113292	0.264386	-3.07958	-1.89225	1.18732
D930028M14Rik	0.655724	1.0281	-0.59788	0.0469799	0.64486
Daam2	0.0235081	0.0379961	-5.13248	-4.53965	0.592834
Dach1	0.0359822	0.0785328	-4.60886	-3.58151	1.02735
Dact3	0.069805	0.135625	-3.74072	-2.83007	0.910646
Dand5	0.943132	1.70997	-0.0768402	0.778183	0.855024
Dapk2	0.0292772	0.0855061	-4.86661	-3.46584	1.40077
Dbil5	0.123986	0.24556	-2.95471	-1.99677	0.957942
Dbn1	37.9994	57.8464	5.24809	5.85428	0.606185
Dbndd2	7.51266	10.8456	2.91028	3.4397	0.529419
Dbpht2	0	0.0159349	-7.64386	-5.57795	2.06591
Dcaf12l1	0.041652	0.0674358	-4.42192	-3.78715	0.634764
Dcc	0	0.00876463	-7.64386	-6.18289	1.46097
Dcdc2a	0	0.0132885	-7.64386	-5.77292	1.87094
Dchs1	0.00438044	0.0127363	-6.73613	-5.81715	0.918978
Dcn	0.172893	0.742196	-2.49092	-0.420441	2.07048
Dcxr	3.0213	4.53441	1.59756	2.1825	0.58495
Ddit3	12.255	52.8166	3.61589	5.72306	2.10717
Ddit4	48.731	118.954	5.60692	6.89432	1.2874
Ddr2	0.118856	0.263359	-3.01326	-1.89776	1.1155
Ddx28	10.3887	16.0482	3.37764	4.00479	0.627152
Ddx3y	0	0.0200236	-7.64386	-5.32057	2.32329
Ddx43	0	0.0222144	-7.64386	-5.19949	2.44437
Dear1	0.286529	0.711693	-1.77829	-0.480573	1.29772
Dedd2	8.4072	13.3455	3.07248	3.73882	0.666339
Def6	1.14893	1.76153	0.206556	0.820918	0.614363
Defb36	0	0.173577	-7.64386	-2.48538	5.15847
Defb41	0	0.345831	-7.64386	-1.51115	6.1327
Dennd2a	0.281306	0.556398	-1.80437	-0.832904	0.971466
Dennd4a	1.25094	1.88977	0.328768	0.922023	0.593255
Des	0	0.0310871	-7.64386	-4.79237	2.85148
Desi2	10.0715	14.9039	3.33292	3.8981	0.565179
Dgka	3.7034	6.12129	1.8908	2.61501	0.724217
Dgkh	0.360814	0.523594	-1.45082	-0.919768	0.53105
Dgki	0	0.0101077	-7.64386	-6.04857	1.59528
Dhdh	0.415647	0.614519	-1.24932	-0.69078	0.558538
Dhrs7	13.0872	26.3111	3.71064	4.71787	1.00724
Dhrs9	4.39872	9.38063	2.13872	3.23045	1.09173
Diras1	0.0168596	0.0327532	-5.51559	-4.72726	0.788332
Diras2	0.0994204	0.192943	-3.25952	-2.33684	0.922681
Disc1	0	0.0201966	-7.64386	-5.31063	2.33323
Disp2	0.876195	1.53343	-0.182467	0.621459	0.803926
Dlgap2	0	0.0105558	-7.64386	-6.0064	1.63745
Dlgap3	0	0.0241477	-7.64386	-5.10047	2.54338
Dlgap4	19.2698	27.5491	4.26864	4.7842	0.515551
Dll1	2.88285	9.78932	1.53	3.29195	1.76195
Dll3	0	0.0227388	-7.64386	-5.17195	2.47191
Dll4	1.04344	1.67015	0.0682443	0.74429	0.676046
Dlx5	0	0.0397834	-7.64386	-4.48089	3.16296
Dmap1	10.6089	15.8663	3.40788	3.98835	0.580465
Dmrt2	0	0.0208748	-7.64386	-5.27231	2.37155
Dmrta1	0.0118324	0.149279	-5.89262	-2.69639	3.19623
Dnaaf3	0.992245	2.01955	-0.00398011	1.0176	1.02158
Dnah2	0.0135586	0.0229921	-5.75177	-5.15884	0.592932
Dnaic2	0.0171696	0.100072	-5.49527	-3.25055	2.24472
Dnaja4	1.50398	2.22289	0.593574	1.15568	0.562104
Dnajb13	0	0.0954348	-7.64386	-3.31567	4.32819
Dnajb3	1.5237	2.92608	0.612305	1.55143	0.939127
Dnajb4	8.23692	12.6645	3.04298	3.66329	0.620307
Dnajb6	84.8717	122.922	6.4073	6.94166	0.534361
Dnajb7	0.0466988	0.136816	-4.27373	-2.81791	1.45582
Dnajb9	9.10232	15.9723	3.18703	3.99795	0.810925
Dnajc30	8.15522	13.683	3.02861	3.77484	0.746232
Dnal4	13.2962	19.3521	3.73348	4.27479	0.541306
Dnase1l1	8.44919	14.4808	3.07967	3.85657	0.776901
Dnase1l3	0.117894	0.572196	-3.02451	-0.792867	2.23165
Dnase2a	6.97401	14.8566	2.80302	3.89352	1.0905
Dner	0	0.051859	-7.64386	-4.13647	3.50739
Dnm1	3.57919	6.74384	1.84165	2.75464	0.912992
Dnmt3aos	0.0388149	0.0757044	-4.51243	-3.63121	0.881226
Dntt	0	0.0238708	-7.64386	-5.11425	2.52961
Doc2a	2.3546	3.62311	1.23854	1.85922	0.620676
Doc2b	0.0339853	0.0879436	-4.68093	-3.4275	1.25343
Dock6	1.08734	1.82941	0.127422	0.875316	0.747894
Dok1	22.1813	33.1267	4.4716	5.05014	0.578543
Dpep1	0	0.0873253	-7.64386	-3.43713	4.20673
Dpep2	0.0763334	0.235438	-3.62001	-2.05626	1.56375
Dpep3	0	0.0302123	-7.64386	-4.82778	2.81608
Dpp7	10.706	16.8244	3.42102	4.07291	0.651891
Dppa2	0.158246	0.307951	-2.61488	-1.67599	0.938889
Dqx1	1.93753	2.93523	0.957937	1.55593	0.597992
Dram1	0.369435	0.563983	-1.41721	-0.813543	0.60367
Draxin	0	0.00888721	-7.64386	-6.1701	1.47376
Dsg1b	0	0.0138915	-7.64386	-5.72612	1.91774
Dsg3	0	0.045519	-7.64386	-4.30703	3.33683
Dtx1	0	0.0126573	-7.64386	-5.82359	1.82026
Dtx3	9.82067	15.0891	3.29656	3.91591	0.619357
Duox1	0.0271221	0.0438468	-4.96029	-4.35559	0.604698
Dus2	6.60612	12.5171	2.72489	3.6464	0.92151
Dusp1	9.22571	38.3947	3.20644	5.26302	2.05658
Dusp10	9.00175	21.7143	3.17101	4.44091	1.2699
Dusp16	4.60723	13.8894	2.20546	3.79643	1.59097
Dusp3	10.2455	15.019	3.35762	3.9092	0.551575
Dusp4	27.2364	65.8844	4.76773	6.04197	1.27425
Dusp5	22.6174	39.7125	4.49968	5.3117	0.812023
Dusp6	53.3157	92.4396	5.73662	6.53052	0.793893
Dusp8	1.41838	4.74393	0.509321	2.2476	1.73828
Duxbl3	0	0.0209043	-7.64386	-5.27066	2.37319
Dvl2	18.5442	27.4261	4.21329	4.77774	0.564456
Dxo	16.7217	23.6538	4.06408	4.5643	0.500224
Dynap	46.2126	83.0104	5.53037	6.37531	0.844937
Dync2li1	7.67484	12.1866	2.94108	3.60782	0.666739
Dynlt1f	1.64486e-05	0.835792	-7.63912	-0.250179	7.38894
Dyrk1b	5.60017	10.263	2.48676	3.36008	0.873325
Dyrk4	0	0.0476799	-7.64386	-4.2466	3.39725
Dyx1c1	0	0.100519	-7.64386	-3.24443	4.39943
E030018B13Rik	0	0.055347	-7.64386	-4.05057	3.59328
E030024N20Rik	0.20071	0.288341	-2.28132	-1.76935	0.511967
E030044B06Rik	0	0.0665737	-7.64386	-3.80443	3.83943
E130102H24Rik	0.422275	0.913484	-1.22676	-0.122674	1.10409
E130112N10Rik	0.239816	0.389846	-2.03023	-1.34064	0.689592
E130304I02Rik	0.373676	0.920076	-1.40096	-0.112356	1.28861
E230016K23Rik	0.0711961	0.138489	-3.71414	-2.80099	0.913151
E230016M11Rik	0.470543	1.37429	-1.07235	0.463926	1.53628
E230025N22Rik	0.884847	1.2789	-0.168371	0.360533	0.528904
E2f2	4.11875	6.9009	2.04396	2.78783	0.743873
E330009J07Rik	1.86185	3.34244	0.900606	1.74306	0.842452
E330011O21Rik	0.061683	0.181207	-3.90654	-2.42502	1.48152
E330020D12Rik	0.139663	0.220474	-2.78923	-2.14897	0.640265
E330034G19Rik	0.0355847	0.104046	-4.62292	-3.19699	1.42593
E430018J23Rik	3.1332	5.59375	1.64994	2.4851	0.835167
Ebi3	0.0474249	0.0926412	-4.2536	-3.35637	0.897238
Ecel1	0	0.0166725	-7.64386	-5.52799	2.11587
Echdc2	10.807	15.7232	3.43456	3.97528	0.54072
Ecm2	0.0134974	0.0393084	-5.75653	-4.49628	1.26026
Eda2r	0.15729	0.264521	-2.62335	-1.89153	0.731824
Edaradd	0.0289693	0.056167	-4.87962	-4.0311	0.848522
Edf1	308.359	442.793	8.26849	8.7905	0.522014
Ednrb	0	0.0172163	-7.64386	-5.49224	2.15162
Eea1	13.5643	21.0389	3.76227	4.39533	0.633056
Efcc1	1.04198	1.5534	0.0662339	0.640066	0.573832
Efhd1	0	0.139285	-7.64386	-2.79301	4.85085
Efna2	0.808697	1.15605	-0.297436	0.21543	0.512867
Efna3	0.763488	1.84151	-0.379905	0.884801	1.26471
Efs	0.0135977	0.0264007	-5.74873	-4.99306	0.755673
Egr1	0.8302	2.27931	-0.259806	1.19176	1.45156
Egr2	0.132677	0.306065	-2.86064	-1.68471	1.17593
Egr3	0.547588	1.22656	-0.855724	0.300487	1.15621
Eid2	5.07546	9.98791	2.34496	3.3209	0.975946
Eid2b	1.60916	2.64697	0.690784	1.40706	0.716281
Eif1	366.071	541.495	8.516	9.08082	0.564818
Eif2s2	122.179	195.848	6.93291	7.61363	0.680716
Eif3c	215.927	310.555	7.75443	8.27873	0.524295
Eif4ebp1	92.3039	214.85	6.5284	7.74722	1.21882
Elavl4	0	0.0124844	-7.64386	-5.83779	1.80607
Elovl3	0	0.106474	-7.64386	-3.16522	4.47864
Elovl4	0.0963978	0.234057	-3.3019	-2.06457	1.23733
Elp5	34.3599	49.5067	5.10286	5.6297	0.526834
Emb	3.44697	4.91378	1.78742	2.2983	0.510881
Emc8-1190005i06rik	1.74582	4.11478	0.808031	2.04257	1.23454
Emc9	4.12641	5.92727	2.04663	2.56858	0.52195
Emilin2	1.29707	2.13412	0.380807	1.09702	0.71621
Emp2	14.3183	20.275	3.84029	4.34199	0.501694
Emx2	0.0382589	0.0929448	-4.53086	-3.35189	1.17897
En2	0	0.0400063	-7.64386	-4.47373	3.17013
Enam	0	0.00839868	-7.64386	-6.22177	1.42209
Endov	2.63056	4.08502	1.39811	2.03211	0.633998
Eng	0.184417	0.290287	-2.40036	-1.75981	0.640552
Eno2	0.798705	2.20367	-0.315262	1.14318	1.45844
Enpp5	5.7531	8.8874	2.52559	3.15257	0.62698
Enthd1	0.216297	0.444118	-2.17594	-1.15483	1.02111
Eomes	2.23561	3.39218	1.16389	1.76434	0.600446
Epas1	0.320089	0.603699	-1.62109	-0.716199	0.904894
Epha8	0	0.00984932	-7.64386	-6.07346	1.5704
Ephb3	6.71408	9.67192	2.74826	3.27455	0.526284
Ephx4	0.0435019	0.636883	-4.36581	-0.639618	3.7262
Epm2a	0	0.1025	-7.64386	-3.21759	4.42626
Eps8l1	0.897674	1.82979	-0.147723	0.875615	1.02334
Epsti1	0.0550339	0.117263	-4.05808	-3.03194	1.02614
Ereg	6.43839	16.315	2.68782	4.02857	1.34075
Erich1	4.13285	6.33178	2.04888	2.66375	0.614869
Erich2	1.21593	1.79016	0.28798	0.844112	0.556132
Erich6	0.0230058	0.0447429	-5.15813	-4.32937	0.828765
Ermap	0	0.0306518	-7.64386	-4.80988	2.83397
Ero1l	38.9334	64.1918	5.28312	6.00443	0.721308
Erp27	0	0.0599934	-7.64386	-3.94356	3.70029
Errfi1	45.3501	65.4133	5.50319	6.03162	0.528429
Esd	109.86	165.201	6.77959	7.36812	0.588534
Espn	0.459118	0.863318	-1.10744	-0.203705	0.903732
Esx1	0.0984818	0.351764	-3.27255	-1.48696	1.78559
Esyt1	27.2905	45.0539	4.77059	5.49374	0.723149
Esyt3	0.0854243	0.155409	-3.46715	-2.64017	0.826973
Etnk2	0.46332	0.793681	-1.09443	-0.324309	0.770125
Eva1a	0.175776	0.370765	-2.46772	-1.4121	1.05563
Evi2b	0.0136075	0.0400963	-5.74797	-4.47085	1.27712
Extl1	0.058541	0.65901	-3.97617	-0.590723	3.38545
F2rl2	0.0405296	0.15757	-4.45705	-2.62087	1.83618
F5	0	0.012276	-7.64386	-5.85509	1.78877
F630042J09Rik	0.0773439	0.135197	-3.60219	-2.83447	0.767722
F730035M05Rik	0	0.0409671	-7.64386	-4.44325	3.2006
F8a	2.40409	4.77045	1.26849	2.25564	0.987148
F930015N05Rik	0	0.0666171	-7.64386	-3.80355	3.8403
Fabp2	0.120602	0.236137	-2.99307	-2.05208	0.940994
Fabp3	0.21093	0.312291	-2.21136	-1.65612	0.555243
Fabp4	1.36789	4.15415	0.457216	2.05629	1.59907
Fads6	0.177209	0.778433	-2.45633	-0.352118	2.10422
Fam105a	0.0174349	0.0677576	-5.47811	-3.78076	1.69735
Fam110c	9.11807	13.4968	3.18952	3.75508	0.56556
Fam117a	2.55778	3.89857	1.35771	1.96479	0.607085
Fam124a	0	0.0132557	-7.64386	-5.77551	1.86835
Fam129a	20.2978	32.1433	4.34361	5.00667	0.663064
Fam131a	0.0443181	0.129268	-4.34174	-2.89681	1.44493
Fam131c	1.82465	4.55334	0.871568	2.18851	1.31694
Fam132b	10.9614	19.389	3.45502	4.27754	0.82252
Fam134b	23.7355	35.8492	4.56928	5.16407	0.594792
Fam13c	0	0.0289429	-7.64386	-4.88075	2.76311
Fam161a	0.608012	0.977444	-0.706013	-0.0255529	0.68046
Fam161b	0.23234	0.39478	-2.07497	-1.32272	0.752251
Fam166a	0	0.0486073	-7.64386	-4.22143	3.42243
Fam167a	1.18108	3.5265	0.246201	1.82028	1.57408
Fam169b	0	0.0339972	-7.64386	-4.68049	2.96337
Fam195b	16.1253	24.4229	4.0117	4.61046	0.598757
Fam19a1	0	0.0145867	-7.64386	-5.67398	1.96987
Fam19a2	0	0.0112505	-7.64386	-5.94337	1.70048
Fam19a3	0	0.0540001	-7.64386	-4.08314	3.56072
Fam209	0	0.101946	-7.64386	-3.22505	4.41881
Fam210b	2.78656	4.2863	1.48107	2.10141	0.620343
Fam212a	0.0535282	0.104679	-4.09472	-3.18864	0.906084
Fam213b	3.08318	4.65953	1.62676	2.22173	0.594975
Fam214a	0.650659	1.73365	-0.608982	0.797968	1.40695
Fam214b	3.09554	9.04001	1.63252	3.17712	1.5446
Fam219a	1.08206	1.91774	0.120432	0.943164	0.822732
Fam219aos	0.364743	0.987492	-1.43541	-0.0108726	1.42453
Fam220a	9.16441	13.4479	3.19683	3.74985	0.553016
Fam228b	0.0512206	0.0829251	-4.15276	-3.50758	0.645176
Fam26e	0.0289621	0.0563874	-4.87993	-4.02591	0.854017
Fam46a	0.0261573	0.0507603	-5.00429	-4.16462	0.839668
Fam50a	47.979	94.0721	5.58448	6.55577	0.97129
Fam65a	13.2245	21.9811	3.72569	4.45852	0.732833
Fam65c	0.754513	1.23776	-0.396853	0.313548	0.710401
Fam71e1	0	0.0698262	-7.64386	-3.74031	3.90354
Fam71f1	1.18665	1.93588	0.252961	0.956711	0.70375
Fam72a	2.16867	3.07017	1.12013	1.62067	0.500533
Fam78b	0.365193	0.533493	-1.43365	-0.893001	0.54065
Fam83e	0.45859	0.725937	-1.10908	-0.452181	0.656898
Fam83f	2.47911	4.06632	1.31273	2.0255	0.712768
Fam84b	9.86501	22.0024	3.30305	4.45992	1.15687
Fam98c	7.53404	11.0502	2.91438	3.46665	0.552272
Fank1	0.0517688	0.100725	-4.13876	-3.24161	0.897146
Far1os	0.133246	0.261193	-2.85469	-1.90946	0.945235
Fbln5	0.00804549	0.0156053	-6.26031	-5.60084	0.659464
Fbxl12	6.14761	10.1963	2.6212	3.35068	0.729483
Fbxl13	0	0.019122	-7.64386	-5.37351	2.27035
Fbxl15	4.00728	6.33221	2.00442	2.66385	0.659426
Fbxl16	0.72254	1.84809	-0.458902	0.889933	1.34883
Fbxl2	1.11453	1.86805	0.162893	0.905389	0.742496
Fbxl20	2.59787	4.21824	1.3801	2.07835	0.698247
Fbxl21	0.546303	0.885877	-0.859083	-0.166702	0.692381
Fbxl7	0	0.0100664	-7.64386	-6.05252	1.59133
Fbxo24	0.609179	1.00257	-0.703269	0.0108801	0.714149
Fbxo27	0.0525522	0.357414	-4.11899	-1.46429	2.6547
Fbxo32	3.3517	5.55695	1.74704	2.47559	0.728547
Fbxo36	2.96779	4.97663	1.57182	2.31662	0.7448
Fbxo38	12.8032	19.5614	3.679	4.29031	0.611311
Fbxo41	0	0.0281954	-7.64386	-4.91287	2.73098
Fbxo44	2.17827	4.32237	1.12649	2.11349	0.987
Fbxw9	8.05554	14.3196	3.01088	3.84042	0.829546
Fcgr3	0.159592	0.272413	-2.60303	-1.84989	0.753141
Fcgrt	0.627264	0.959705	-0.661401	-0.0518403	0.609561
Fchsd1	1.8548	3.59978	0.895147	1.84991	0.954764
Fcna	0.123574	0.200934	-2.95933	-2.27975	0.679583
Fcrlb	0	0.0414267	-7.64386	-4.4289	3.21495
Fdft1	28.953	47.3414	4.85589	5.56518	0.709293
Fdps	179.077	362.151	7.48448	8.50047	1.01599
Fgf15	0.285822	0.695548	-1.78179	-0.513444	1.26835
Fgf16	0	0.0156811	-7.64386	-5.59554	2.04831
Fgf2	0.18722	0.553193	-2.37917	-0.841164	1.53801
Fgf21	0	0.483878	-7.64386	-1.03245	6.6114
Fgf22	0	0.161482	-7.64386	-2.58656	5.05729
Fgf7	0.111332	0.216351	-3.10368	-2.17559	0.928088
Fgl1	0.400575	0.587153	-1.30196	-0.755958	0.546001
Fgr	0	0.0141669	-7.64386	-5.70524	1.93862
Fhad1	0.0957894	0.237516	-3.31058	-2.04385	1.26674
Fhdc1	14.3613	20.4002	3.84462	4.35086	0.506248
Fhl2	27.9616	41.5994	4.80563	5.37866	0.573031
Fip1l1	41.8788	61.1201	5.38832	5.93369	0.545373
Fkbp1b	0.709583	1.04179	-0.484827	0.065972	0.550799
Fkbpl	6.90341	10.4221	2.78835	3.38227	0.593912
Flcn	11.2329	17.6194	3.4903	4.1395	0.649202
Flrt3	3.78297	7.94933	1.92142	2.99174	1.07032
Flt3	0.0132626	0.128743	-5.77496	-2.90246	2.8725
Flywch2	1.61448	3.74242	0.695531	1.9059	1.21037
Fmo1	0	0.041967	-7.64386	-4.41221	3.23165
Fmo2	0	0.0283883	-7.64386	-4.90451	2.73934
Fmo4	0.0578876	0.0845273	-3.99108	-3.48153	0.509552
Fmod	0	0.0167543	-7.64386	-5.52256	2.1213
Fn3k	0.0125359	0.0559763	-5.83354	-4.03561	1.79794
Fndc5	0	0.0356236	-7.64386	-4.62154	3.02232
Fnip1	8.51073	12.2627	3.09013	3.61679	0.526663
Fnip2	6.50218	9.76879	2.70203	3.28892	0.586886
Folr2	0	0.0512638	-7.64386	-4.15165	3.49221
Fos	0.654392	1.98018	-0.600792	0.98927	1.59006
Fosb	0.64084	0.982804	-0.630751	-0.0177033	0.613048
Fosl1	15.2332	24.7319	3.92962	4.62859	0.698972
Fosl2	17.8829	28.8583	4.16091	4.85116	0.690252
Foxa2	10.6618	16.1396	3.41506	4.01298	0.597924
Foxa3	0.274605	0.825664	-1.83854	-0.267663	1.57087
Foxc2	0.0181721	0.176556	-5.43147	-2.46151	2.96995
Foxd4	0	0.0623892	-7.64386	-3.89134	3.75252
Foxl1	0	0.032276	-7.64386	-4.74561	2.89825
Foxn1	0.254369	0.36341	-1.94692	-1.44062	0.506306
Foxo1	5.96542	8.50865	2.57783	3.08978	0.511945
Foxo3	5.78146	8.33291	2.53268	3.05969	0.527005
Foxs1	0.0414149	0.12122	-4.42927	-2.98599	1.44328
Fpr2	0	0.0409671	-7.64386	-4.44325	3.2006
Frg1	37.5158	56.3519	5.22962	5.81652	0.586902
Frmd8	36.4198	55.2429	5.18685	5.78785	0.600999
Frzb	0.202315	0.294779	-2.2701	-1.73803	0.532075
Fscn2	0	0.0294688	-7.64386	-4.85857	2.78529
Fsip1	0.187161	0.45567	-2.37961	-1.11819	1.26142
Fth1	923.338	2031.15	9.85072	10.9881	1.13736
Ftl1	1677.73	2702	10.7123	11.3998	0.687515
Fuca2	10.2792	15.0593	3.36236	3.91306	0.550704
Fuk	5.54034	8.32441	2.47128	3.05821	0.586938
Fuom	2.05655	3.50366	1.04373	1.81092	0.767191
Fut1	0	0.899077	-7.64386	-0.145482	7.49837
Fut7	0.0590682	0.11504	-3.96425	-3.05841	0.905835
Fxyd4	0	0.131203	-7.64386	-2.87617	4.76769
Fyn	4.66053	12.7119	2.22204	3.66868	1.44663
Fzd8	0.801466	1.1602	-0.310314	0.220578	0.530892
G0s2	9.12555	15.0149	3.1907	3.9088	0.718102
G630025P09Rik	3.95415	7.72875	1.98519	2.95117	0.965977
G630064G18Rik	0	0.0280332	-7.64386	-4.91994	2.72392
G630071F17Rik	0.0159043	0.0308921	-5.58006	-4.80019	0.779867
G630090E17Rik	0.141763	0.45124	-2.76844	-1.13214	1.6363
Gaa	28.0563	45.3382	4.81051	5.50281	0.692304
Gab2	2.58703	5.33081	1.37408	2.41571	1.04162
Gabarap	111.516	180.786	6.80117	7.49818	0.697007
Gabarapl1	28.5892	46.9076	4.83765	5.5519	0.714253
Gabrb3	0	0.00835003	-7.64386	-6.22701	1.41684
Gabrq	0	0.0216816	-7.64386	-5.22801	2.41585
Gad1	0.0605045	0.264388	-3.93226	-1.89224	2.04002
Gadd45a	6.5185	24.3583	2.70565	4.60664	1.90099
Gadl1	0	0.0128893	-7.64386	-5.80476	1.8391
Galnt15	0.0642973	0.208355	-3.85106	-2.22867	1.62238
Galnt18	0.0386304	0.131391	-4.51852	-2.87418	1.64434
Galr2	0.105558	0.154065	-3.17712	-2.65231	0.524813
Gap43	0.752278	1.7127	-0.401105	0.780478	1.18158
Gapdhs	0.0720662	0.10686	-3.69776	-3.16023	0.537524
Gareml	0.0252377	0.0979838	-5.04751	-3.27951	1.768
Garnl3	0.40276	0.72623	-1.29421	-0.451603	0.842605
Gars	129.48	266.635	7.01664	8.05875	1.04211
Gas6	0.517577	1.8628	-0.936284	0.90134	1.83762
Gas8	23.9049	37.0958	4.57954	5.21338	0.633842
Gata3	2.43305	4.35612	1.28573	2.1247	0.838971
Gata4	1.07679	2.0073	0.11342	1.00885	0.895425
Gata5os	0.0310875	0.0605484	-4.79236	-3.9313	0.861061
Gatsl3	5.83102	10.4993	2.54498	3.39291	0.847923
Gbp5	0	0.0315745	-7.64386	-4.77302	2.87084
Gcc1	5.98128	8.62766	2.58166	3.10981	0.528145
Gch1	3.02306	11.1223	1.59839	3.47603	1.87764
Gdap1	0	0.04761	-7.64386	-4.24852	3.39534
Gdf1	0.200199	0.55156	-2.2849	-0.845391	1.43951
Gdf15	1.87652	27.9744	0.911899	4.80629	3.89439
Gdf7	0	0.149619	-7.64386	-2.69321	4.95065
Gdf9	0.0572717	0.167247	-4.00528	-2.53745	1.46783
Gdnf	0.508689	0.931665	-0.961033	-0.0943949	0.866638
Gdpd1	20.6292	36.5855	4.36697	5.1934	0.826432
Gdpd2	0	0.0185968	-7.64386	-5.40526	2.23859
Gdpd3	5.6279	8.82475	2.49388	3.14237	0.648495
Gem	1.09321	3.25386	0.135154	1.70437	1.56921
Gfi1	0.205944	0.382032	-2.24507	-1.36948	0.875593
Gfi1b	0.0301606	0.248061	-4.8299	-1.98244	2.84745
Gfpt2	0.213971	0.479598	-2.19119	-1.04514	1.14605
Ggnbp1	0.51001	0.909435	-0.957328	-0.129047	0.82828
Ggnbp2	32.2333	47.0685	5.0107	5.55684	0.546139
Ggt7	0.133182	0.406739	-2.85536	-1.2802	1.57516
Ghitm	47.7371	91.6094	5.57719	6.5175	0.940312
Gimap4	0.0570575	0.154232	-4.01025	-2.6508	1.35945
Gipc1	28.9171	41.5717	4.8541	5.3777	0.523603
Gipc3	0	0.0547317	-7.64386	-4.06536	3.5785
Gja6	0.0252674	0.0491612	-5.04609	-4.2066	0.839495
Gjb2	0.395543	0.60708	-1.31997	-0.708208	0.611763
Gjb6	0	0.0234061	-7.64386	-5.13766	2.5062
Gje1	0	0.105282	-7.64386	-3.18073	4.46313
Gk2	0	0.0542473	-7.64386	-4.07711	3.56675
Gkn1	0	0.0440634	-7.64386	-4.34921	3.29465
Gkn2	0.240492	0.393816	-2.02625	-1.3262	0.700047
Gla	12.8398	24.6892	3.68311	4.6261	0.942988
Glb1l	1.52286	2.34095	0.611512	1.23017	0.61866
Gli1	0.0132396	0.0257039	-5.77678	-5.02543	0.751348
Glipr2	3.33161	6.04013	1.73838	2.59577	0.85739
Glis1	0.0847981	0.181214	-3.47717	-2.42497	1.0522
Glra1	0.020939	0.0407297	-5.26873	-4.45072	0.818009
Glra4	0	0.0370731	-7.64386	-4.57096	3.0729
Glrb	0.0648344	0.176292	-3.83992	-2.46361	1.37631
Glrp1	4.1552	9.9928	2.05665	3.32161	1.26496
Glt28d2	0.488126	0.860668	-1.01997	-0.208114	0.811858
Glyatl3	0	0.0672814	-7.64386	-3.79023	3.85362
Gm10046	0	0.106087	-7.64386	-3.17024	4.47362
Gm10190	0	0.0301096	-7.64386	-4.83199	2.81187
Gm10354	0	0.0763212	-7.64386	-3.62022	4.02363
Gm10406	0	0.0254562	-7.64386	-5.03712	2.60674
Gm10416	0	0.932501	-7.64386	-0.0931079	7.55075
Gm10432	0.0199587	0.0387258	-5.32431	-4.51537	0.808942
Gm10451	0.0666231	0.130597	-3.80343	-2.8826	0.920828
Gm10471	0	0.0141669	-7.64386	-5.70524	1.93862
Gm10509	1.17201	2.18125	0.235127	1.12846	0.893332
Gm10536	0	0.0438196	-7.64386	-4.3564	3.28746
Gm10548	0.0188847	0.0550509	-5.38777	-4.05767	1.3301
Gm10640	0	0.0481844	-7.64386	-4.23285	3.411
Gm10768	0.423465	0.630009	-1.22275	-0.655151	0.5676
Gm10782	0	0.0350108	-7.64386	-4.64347	3.00039
Gm10785	0.152231	0.23717	-2.66904	-2.04591	0.623134
Gm10791	0.158014	0.246232	-2.61693	-1.99291	0.624024
Gm10863	0	0.0951668	-7.64386	-3.31952	4.32433
Gm10865	0.271395	0.801456	-1.8552	-0.310332	1.54486
Gm11110	1.78604	2.67524	0.840798	1.42236	0.581565
Gm11213	0	0.164728	-7.64386	-2.5587	5.08515
Gm11413	0	0.0355444	-7.64386	-4.62435	3.0195
Gm11517	0	0.47279	-7.64386	-1.06555	6.5783
Gm11627	0	0.0957833	-7.64386	-3.31067	4.33318
Gm11944	0.138117	0.203078	-2.80473	-2.2648	0.539929
Gm11992	0.041712	0.0810922	-4.42006	-3.53797	0.882089
Gm12596	0	0.0831644	-7.64386	-3.50366	4.1402
Gm12603	14.7518	21.2056	3.88331	4.40671	0.523406
Gm13119	0.049045	0.0715584	-4.2097	-3.7073	0.5024
Gm13152	0	0.12936	-7.64386	-2.89582	4.74803
Gm13154	0.0174579	0.101757	-5.47663	-3.2276	2.24904
Gm13238	0.32235	0.475113	-1.61109	-1.05855	0.55254
Gm13271	0	0.264485	-7.64386	-1.89172	5.75213
Gm13272	0	0.0742741	-7.64386	-3.65701	3.98685
Gm13277	0	0.0355159	-7.64386	-4.62537	3.01849
Gm13287	0	0.132242	-7.64386	-2.86521	4.77865
Gm13288	0	0.0336231	-7.64386	-4.69439	2.94946
Gm13375	2.29008	3.4067	1.19854	1.77049	0.571946
Gm13483	0.0479719	0.134675	-4.23863	-2.83985	1.39877
Gm13547	0.108203	0.213705	-3.14302	-2.19294	0.950074
Gm13582	0.0186842	0.0544644	-5.39993	-4.07183	1.3281
Gm13710	0.220057	0.863778	-2.15164	-0.202941	1.9487
Gm14124	0.146448	0.284475	-2.72311	-1.78849	0.934616
Gm14137	6.68519	10.3914	2.74205	3.37801	0.635965
Gm14139	0.811783	1.43443	-0.291975	0.525498	0.817473
Gm14379	0.109473	0.159807	-3.12692	-2.60115	0.52577
Gm14391	0	0.0194194	-7.64386	-5.35583	2.28803
Gm14634	0	0.0918265	-7.64386	-3.36845	4.2754
Gm15104	0	0.218102	-7.64386	-2.16422	5.47963
Gm15217	0	0.0964079	-7.64386	-3.30176	4.3421
Gm15319	0	0.019268	-7.64386	-5.3648	2.27906
Gm15408	0.0390135	0.114142	-4.50591	-3.06925	1.43666
Gm15413	0	0.0257521	-7.64386	-5.02317	2.62068
Gm1564	0.0104679	0.0203127	-6.01458	-5.30399	0.710584
Gm15867	0.174687	0.284921	-2.47644	-1.78627	0.690174
Gm15910	0.231513	0.65854	-2.08001	-0.591745	1.48826
Gm15941	0	0.0274939	-7.64386	-4.94369	2.70017
Gm15972	0	0.860302	-7.64386	-0.208724	7.43513
Gm15987	0	0.0510726	-7.64386	-4.15656	3.4873
Gm16070	0	0.0216183	-7.64386	-5.23144	2.41242
Gm16223	0.0198086	0.0577538	-5.33302	-3.99415	1.33886
Gm16386	0.364677	0.619293	-1.43566	-0.679705	0.755958
Gm16445	0.0598278	0.175698	-3.94724	-2.46835	1.4789
Gm16532	0	0.0224281	-7.64386	-5.1882	2.45565
Gm16548	1.54758	2.63288	0.634668	1.39938	0.764711
Gm1661	0	0.0366007	-7.64386	-4.58725	3.05661
Gm16701	0	0.0614068	-7.64386	-3.91253	3.73133
Gm16712	0.103178	0.17567	-3.20852	-2.46857	0.73995
Gm16833	0	0.0964079	-7.64386	-3.30176	4.3421
Gm16861	0.518056	0.740399	-0.934963	-0.423915	0.511047
Gm16897	0.0801013	0.175164	-3.55468	-2.47262	1.08206
Gm16998	0.0446917	0.087259	-4.33085	-3.43817	0.892685
Gm17689	0.690999	2.11071	-0.522843	1.08114	1.60398
Gm17745	0	0.138344	-7.64386	-2.80245	4.84141
Gm17801	0.0763346	0.111649	-3.61999	-3.09975	0.520233
Gm19299	0	0.0363016	-7.64386	-4.59766	3.0462
Gm19424	0	0.0218961	-7.64386	-5.21646	2.4274
Gm1943	12.0623	17.1377	3.59303	4.09952	0.506491
Gm19434	0	0.018794	-7.64386	-5.39326	2.2506
Gm19466	0.065369	0.148289	-3.82892	-2.70567	1.12324
Gm19557	0.858284	1.2334	-0.212093	0.308477	0.52057
Gm19619	0	0.117414	-7.64386	-3.03016	4.6137
Gm19782	0	0.00968568	-7.64386	-6.08945	1.55441
Gm1993	0	0.0625335	-7.64386	-3.88825	3.7556
Gm19990	0	0.0440196	-7.64386	-4.3505	3.29336
Gm2016	0.146668	0.285571	-2.72101	-1.78304	0.937974
Gm20199	0.132765	0.292843	-2.85972	-1.74738	1.11234
Gm2027	0.0162316	0.0945887	-5.55764	-3.32787	2.22977
Gm20324	0.704089	1.13037	-0.495961	0.183163	0.679124
Gm20337	0.391157	0.573226	-1.33586	-0.790295	0.545561
Gm20556	0	0.0433313	-7.64386	-4.3709	3.27296
Gm20594	2.69111	5.47599	1.43088	2.45444	1.02356
Gm20597	0	0.00840505	-7.64386	-6.22108	1.42278
Gm20735	0.217433	0.751583	-2.16856	-0.40243	1.76613
Gm20752	0	0.0677087	-7.64386	-3.78173	3.86213
Gm20939	2.58327	3.75629	1.37199	1.91123	0.539239
Gm21188	0	0.0289868	-7.64386	-4.87888	2.76497
Gm21284	0.0388531	0.0628558	-4.51118	-3.88138	0.629793
Gm21319	0	0.0268768	-7.64386	-4.97135	2.67251
Gm2381	0	0.0459081	-7.64386	-4.29596	3.3479
Gm26688	0.0336163	0.0654864	-4.69465	-3.82651	0.868135
Gm3086	0.108476	0.856908	-3.13954	-0.214394	2.92515
Gm3230	0.0727873	0.141592	-3.68432	-2.77012	0.9142
Gm3336	0.0483777	0.189037	-4.22762	-2.3656	1.86202
Gm3558	0.0742441	0.168512	-3.65755	-2.52689	1.13066
Gm3704	0.0217482	0.190294	-5.22441	-2.35628	2.86813
Gm3776	0.205556	0.738973	-2.24772	-0.426678	1.82105
Gm38397	0	0.0214197	-7.64386	-5.24224	2.40161
Gm38415	0.0171503	0.0333197	-5.49653	-4.70577	0.79076
Gm38416	0	0.039672	-7.64386	-4.48449	3.15937
Gm4013	1.07572	1.94468	0.111993	0.963237	0.851245
Gm4262	0.591938	0.876365	-0.744347	-0.182188	0.562159
Gm4847	0	0.015838	-7.64386	-5.58464	2.05922
Gm4850	0.0646463	0.126676	-3.84381	-2.92494	0.918874
Gm4944	4.33666	7.00861	2.11825	2.81016	0.69191
Gm4961	0	0.065333	-7.64386	-3.82965	3.8142
Gm4971	0.105696	0.206673	-3.17533	-2.24009	0.935234
Gm4980	0	0.0156978	-7.64386	-5.59438	2.04948
Gm4984	0.062526	0.612371	-3.88841	-0.69579	3.19262
Gm5082	0	0.0363885	-7.64386	-4.59463	3.04923
Gm5105	0.0313645	0.213819	-4.78133	-2.19219	2.58914
Gm527	1.01936	1.63242	0.0347228	0.711424	0.676702
Gm5409	0	0.167027	-7.64386	-2.53929	5.10456
Gm5415	0	0.0250783	-7.64386	-5.05513	2.58872
Gm5431	0.0165486	0.0321472	-5.53626	-4.7506	0.785659
Gm5640	0	0.0167417	-7.64386	-5.52339	2.12046
Gm5741	0	0.713463	-7.64386	-0.477014	7.16684
Gm5796	0	0.0276829	-7.64386	-4.93532	2.70854
Gm5797	0	0.11324	-7.64386	-3.08021	4.56365
Gm6083	0	0.0959906	-7.64386	-3.30771	4.33615
Gm6182	0	0.00876333	-7.64386	-6.18303	1.46083
Gm6277	0	0.0366924	-7.64386	-4.58407	3.05978
Gm6313	0	0.0566221	-7.64386	-4.02041	3.62345
Gm6377	0.0528985	0.1713	-4.11033	-2.5039	1.60643
Gm6484	1.18073	4.56329	0.245776	2.19165	1.94588
Gm6498	0	0.0640032	-7.64386	-3.85719	3.78666
Gm6537	0	0.0530286	-7.64386	-4.10709	3.53676
Gm6578	0	0.0580291	-7.64386	-3.98784	3.65602
Gm6602	0	0.0258724	-7.64386	-5.01754	2.62632
Gm6787	0.220011	0.321706	-2.15193	-1.61394	0.537997
Gm684	0.562849	1.09867	-0.816421	0.142309	0.95873
Gm7325	0	0.0746495	-7.64386	-3.65019	3.99367
Gm7367	12.1515	25.59	3.60366	4.67779	1.07413
Gm773	0	0.0601563	-7.64386	-3.93995	3.7039
Gm7977	0	0.083044	-7.64386	-3.50563	4.13822
Gm8096	0	0.0306512	-7.64386	-4.80991	2.83395
Gm8221	0	0.010785	-7.64386	-5.9853	1.65855
Gm8300	0.0824006	0.187116	-3.51621	-2.37995	1.13626
Gm8439	0	0.213101	-7.64386	-2.19693	5.44692
Gm8615	2.38764	3.83088	1.2586	1.93956	0.680954
Gm8979	0	0.0276616	-7.64386	-4.93626	2.7076
Gm8994	0.0669515	0.0978422	-3.79683	-3.2815	0.515336
Gm9047	0	0.102653	-7.64386	-3.21554	4.42832
Gm933	0	0.144634	-7.64386	-2.74049	4.90337
Gm9776	0.766905	1.40118	-0.373505	0.491781	0.865286
Gm996	0.0204356	0.0793058	-5.29701	-3.56822	1.72878
Gmfg	2.4028	4.36615	1.26772	2.12801	0.860297
Gml	0	0.0652022	-7.64386	-3.83234	3.81152
Gmppa	18.9347	27.12	4.24334	4.76155	0.51821
Gna14	0	0.167803	-7.64386	-2.5328	5.11106
Gnao1	0.0324676	0.105469	-4.73821	-3.17829	1.55993
Gnat1	0.0228564	0.111128	-5.16585	-3.10621	2.05964
Gnb5	3.24807	7.82336	1.7018	2.96871	1.26691
Gng11	0.0725382	0.213516	-3.68895	-2.19419	1.49476
Gng13	0.217107	0.654307	-2.17067	-0.600978	1.5697
Gnpda1	7.88861	12.8958	2.98069	3.68939	0.708703
Gnpnat1	9.4854	14.1614	3.24647	3.8244	0.577932
Gnrh1	0.14461	0.574829	-2.74072	-0.786301	1.95442
Got1	40.5429	58.5785	5.34156	5.87242	0.530867
Gp1ba	0.126953	0.193826	-2.9219	-2.33042	0.591482
Gp1bb	0.0723186	0.275892	-3.69304	-1.83191	1.86113
Gp5	0	0.0446527	-7.64386	-4.33198	3.31187
Gpank1	12.3954	17.9329	3.63231	4.16494	0.532624
Gpat2	0	0.0183579	-7.64386	-5.41995	2.22391
Gpatch2l	4.48562	6.38682	2.16691	2.67623	0.509312
Gpatch3	5.22017	7.48145	2.38548	2.90428	0.518804
Gpcpd1	4.26405	7.18281	2.09392	2.84555	0.751637
Gpr137b	27.6685	39.3501	4.79043	5.29848	0.508045
Gpr137b-ps	10.7408	17.1605	3.4257	4.10144	0.675739
Gpr137c	0.0613377	0.0993648	-3.91403	-3.26029	0.653734
Gpr141	0	0.0137663	-7.64386	-5.73571	1.90814
Gpr146	0.936651	1.72599	-0.0867356	0.791597	0.878333
Gpr149	0.321611	0.525183	-1.61435	-0.915438	0.698917
Gpr150	0	0.0688169	-7.64386	-3.75991	3.88395
Gpr152	0	0.0358326	-7.64386	-4.61413	3.02972
Gpr165	0	0.0148706	-7.64386	-5.65322	1.99064
Gpr17	0	0.062298	-7.64386	-3.89329	3.75056
Gpr174	0	0.0177353	-7.64386	-5.45892	2.18493
Gpr179	0.0706235	0.112461	-3.72502	-3.08975	0.635275
Gpr20	0	0.0229985	-7.64386	-5.15851	2.48535
Gpr21	0.0656504	0.14893	-3.82316	-2.69965	1.1235
Gpr27	0	0.0478721	-7.64386	-4.24135	3.40251
Gpr3	0.0236235	0.183797	-5.12666	-2.40509	2.72156
Gpr34	0.0541214	0.0789911	-4.08018	-3.57362	0.506556
Gpr35	0.125009	0.20239	-2.94332	-2.26958	0.673735
Gpr37l1	0	0.0869397	-7.64386	-3.44317	4.20069
Gpr75	0.0168472	0.114552	-5.51641	-3.06429	2.45212
Gpt	4.83092	6.98283	2.27379	2.80484	0.531054
Gpt2	5.61491	35.7313	2.49055	5.15932	2.66877
Gpx2	0	0.415769	-7.64386	-1.2489	6.39496
Gpx5	0	0.0313229	-7.64386	-4.78298	2.86088
Gramd1b	4.59677	6.81775	2.20219	2.77035	0.568164
Gramd2	0.748275	1.45958	-0.408751	0.550487	0.959238
Gramd3	1.44959	2.78018	0.540613	1.47777	0.937158
Grap2	0	0.0171501	-7.64386	-5.49654	2.14731
Grasp	17.1091	27.9701	4.09711	4.80607	0.708958
Grb10	1.97737	4.32665	0.987226	2.11492	1.12769
Greb1	0.0119639	0.0347975	-5.88139	-4.65118	1.23021
Grem1	0.383204	3.26582	-1.36511	1.70965	3.07477
Grhl1	0.589137	1.16866	-0.751132	0.231015	0.982147
Grik5	2.65818	3.80281	1.41315	1.92896	0.515812
Grin1os	0.102137	0.16536	-3.22247	-2.55334	0.66913
Grina	100.938	175.697	6.6574	7.45699	0.79959
Grip1	0.428386	0.712282	-1.20628	-0.479388	0.726888
Grip1os1	0	0.0509551	-7.64386	-4.15959	3.48427
Grip1os2	0	0.0871253	-7.64386	-3.44026	4.2036
Grn	118.494	171.162	6.88873	7.41926	0.53053
Grpel2	7.01826	14.108	2.81214	3.81895	1.00681
Grrp1	0	0.043802	-7.64386	-4.35692	3.28694
Gsdmc4	0	0.0236997	-7.64386	-5.12282	2.52104
Gspt2	7.16279	11.6285	2.84153	3.54021	0.698685
Gsta1	0.279517	0.753832	-1.81341	-0.398148	1.41527
Gsta3	0.398248	1.11229	-1.31026	0.160004	1.47026
Gstm4	1.96776	4.20392	0.980215	2.07345	1.09323
Gstm6	0.290266	0.425334	-1.75991	-1.21647	0.543442
Gsto2	1.30505	3.09949	0.389622	1.63436	1.24473
Gstp2	3.52111	5.52255	1.81808	2.46664	0.648563
Gstt1	2.86388	4.41707	1.52049	2.14472	0.624234
Gstt2	0.117946	0.498466	-3.0239	-0.990034	2.03387
Gtf2f1	70.0009	99.2957	6.1294	6.63373	0.504327
Gtf2ird1	15.2844	21.8677	3.93446	4.45106	0.5166
Gtpbp2	12.9438	27.6929	3.69475	4.7917	1.09696
Gucy2c	0.0125024	0.0357171	-5.8363	-4.61822	1.21808
Gulo	0	0.0648232	-7.64386	-3.84015	3.80371
Gys1	25.8341	43.9683	4.69148	5.45856	0.767072
H1fnt	0.0408601	0.0797228	-4.44662	-3.56111	0.885511
H2-DMa	0.189094	0.33763	-2.36517	-1.54528	0.819896
H2-K1	65.6224	98.7335	6.03623	6.62554	0.589314
H2-L	8.56353	19.6792	3.09905	4.29897	1.19992
H2-M10.2	0	0.0571312	-7.64386	-4.00854	3.63532
H2-M3	2.59033	4.31897	1.37592	2.11236	0.736439
H2-Q2	0	0.050091	-7.64386	-4.18204	3.46182
H2-T3	0	0.0225651	-7.64386	-5.18101	2.46284
H2-T9	2.90561	4.52669	1.54132	2.18005	0.638728
H2afy3	0.268385	0.417863	-1.87099	-1.24174	0.629256
H60c	0.0175248	0.0340495	-5.47234	-4.67855	0.79379
Habp2	0.393626	0.598252	-1.32689	-0.729167	0.597725
Halr1	0	0.259114	-7.64386	-1.92077	5.72309
Harbi1	3.95334	7.13494	1.9849	2.83591	0.851016
Has2os	0.163482	0.325923	-2.56933	-1.59543	0.973901
Havcr2	1.32656	2.63071	0.413117	1.39819	0.985074
Hax1	54.5001	127.761	5.76832	6.99736	1.22904
Hbp1	13.619	24.6403	3.76808	4.62324	0.855162
Hcar2	0.210268	0.690491	-2.21579	-0.523896	1.6919
Hcfc1r1	31.4215	48.2905	4.97391	5.59382	0.619907
Hcn3	0.179672	0.290776	-2.43696	-1.75742	0.67954
Hcn4	0.662391	1.36006	-0.583396	0.448964	1.03236
Hdac11	2.47988	3.59585	1.31318	1.84834	0.535161
Hdac5	3.91311	8.57478	1.97016	3.10094	1.13078
Hdac8	3.91888	6.39867	1.97228	2.6789	0.706618
Hddc3	15.117	22.1695	3.91858	4.47083	0.552253
Hdgfrp3	0	0.0156743	-7.64386	-5.59602	2.04784
Hdhd3	4.1748	6.93787	2.06343	2.79553	0.732098
Hebp1	1.87349	3.9778	0.909573	1.99378	1.08421
Hecw2	0.00833932	0.0564769	-6.22817	-4.02381	2.20436
Helz2	3.88559	6.305	1.95999	2.65764	0.697651
Hepacam2	0	0.0219177	-7.64386	-5.2153	2.42856
Herpud1	62.1399	95.3264	5.95756	6.57488	0.617315
Hes5	0	0.0418572	-7.64386	-4.41559	3.22827
Hes7	0.120761	0.591129	-2.99124	-0.746304	2.24494
Hexa	14.7292	31.8373	3.8811	4.99287	1.11178
Hgs	38.6894	59.3607	5.27405	5.89156	0.617505
Hhipl1	0.190736	0.333622	-2.35302	-1.56225	0.790767
Hhipl2	0.058437	0.121416	-3.97853	-2.98375	0.994783
Hid1	4.45338	20.0975	2.15652	4.3293	2.17278
Hif1a	47.3423	68.3148	5.56521	6.09423	0.529022
Higd1a	17.7055	26.2606	4.14653	4.7151	0.56857
Hilpda	45.4024	123.333	5.50486	6.94647	1.44162
Hist1h2ae	0.519762	0.772855	-0.930265	-0.362427	0.567838
Hist1h2ag	0.171298	0.341923	-2.50391	-1.52731	0.976599
Hist1h2ao	1.81561e-05	0.524306	-7.63863	-0.917826	6.7208
Hist1h2bk	0.310564	0.463753	-1.664	-1.0931	0.570895
Hist1h3a	0.154249	0.30706	-2.65064	-1.6801	0.970539
Hist1h4c	0.263389	0.798245	-1.8976	-0.316088	1.58151
Hist1h4m	0	0.45536	-7.64386	-1.11917	6.52469
Hist2h2aa2	0	0.116059	-7.64386	-3.04622	4.59764
Hivep3	0.0103809	0.0201248	-6.02272	-5.31474	0.707972
Hk1os	0.390925	1.55018	-1.3367	0.637082	1.97378
Hkdc1	1.34043	1.91136	0.428067	0.938369	0.510301
Hlx	3.77198	8.82693	1.91723	3.14273	1.2255
Hmces	25.5295	38.7515	4.67438	5.27637	0.60199
Hmga2-ps1	7.01868	11.8674	2.81223	3.56954	0.757313
Hmgcl	6.93831	12.4212	2.79562	3.63531	0.83969
Hmgcs1	64.4993	95.0444	6.01132	6.57061	0.559282
Hmgcs2	0	0.0143877	-7.64386	-5.68871	1.95514
Hmox1	15.0645	56.1679	3.91356	5.8118	1.89824
Hnf4aos	0	0.140985	-7.64386	-2.77611	4.86775
Hnmt	0	0.0311249	-7.64386	-4.79086	2.85299
Hoga1	0.800577	1.18524	-0.311906	0.251253	0.563158
Hook2	17.5025	24.9752	4.1299	4.64271	0.512812
Hoxa11	0	0.0213681	-7.64386	-5.24506	2.39879
Hoxa11os	0.028022	0.0545478	-4.92043	-4.06981	0.850621
Hoxb4	0.193888	0.357997	-2.32997	-1.46197	0.868001
Hoxb9	0.0550631	0.267499	-4.05738	-1.87568	2.1817
Hoxc6	0	0.22515	-7.64386	-2.11935	5.5245
Hpdl	5.40874	8.90915	2.43663	3.1561	0.719472
Hpgds	0.739917	2.77323	-0.424848	1.47417	1.89901
Hps6	10.1254	16.0694	3.34062	4.00669	0.666074
Hpx	2.11928	4.62142	1.08697	2.2099	1.12292
Hr	2.32197	6.79839	1.21845	2.76625	1.5478
Hrc	0.0411493	0.0999926	-4.43755	-3.25164	1.18591
Hrh1	1.3051	2.47149	0.389677	1.3083	0.91862
Hrk	0.00886723	0.163416	-6.17218	-2.5699	3.60228
Hs1bp3	8.59606	15.7137	3.10451	3.97441	0.869896
Hscb	9.64441	14.43	3.27044	3.8515	0.581058
Hsd11b1	0.240631	0.387012	-2.02544	-1.35103	0.674405
Hsd17b13	0	0.0414267	-7.64386	-4.4289	3.21495
Hsd17b2	0	0.0831644	-7.64386	-3.50366	4.1402
Hsd17b7	8.22297	12.5009	3.04054	3.64454	0.604
Hsd3b7	21.7959	33.5838	4.44632	5.06991	0.623593
Hsf4	2.33996	3.90874	1.22956	1.96855	0.738985
Hspa12a	0	0.0240866	-7.64386	-5.1035	2.54035
Hspa2	5.71729	11.2107	2.51659	3.48745	0.970855
Hspb1	36.7078	66.9883	5.19821	6.06594	0.867734
Hspb11	6.6083	13.1007	2.72537	3.71212	0.986752
Hspb7	0.01786	0.0347028	-5.45103	-4.65462	0.796415
Hspb9	0	0.173229	-7.64386	-2.4882	5.15566
Htatip2	11.5356	18.9497	3.52865	4.24448	0.715837
Htr2a	0	0.0160736	-7.64386	-5.56842	2.07544
Htr4	0.0102798	0.0598408	-6.03223	-3.94695	2.08528
Hvcn1	0.0187068	0.0545315	-5.39856	-4.0702	1.32835
Hyal1	1.76621	3.86454	0.824735	1.95216	1.12743
Hydin	0.00293724	0.0142298	-6.97715	-5.70051	1.27663
Hyi	7.10591	11.2211	2.83003	3.48878	0.658751
Hypm	0	0.260626	-7.64386	-1.91253	5.73132
Iah1	12.968	29.6405	3.69744	4.88974	1.1923
Iars	59.7988	93.1175	5.90217	6.54106	0.638893
Icosl	0.144004	0.279814	-2.74658	-1.81191	0.934669
Idi2	0.0224637	0.0436842	-5.18633	-4.3604	0.825928
Idnk	3.66081	5.63489	1.87413	2.49567	0.621535
Ido1	0.0703998	0.245381	-3.7293	-1.9978	1.73149
Ido2	0.635512	0.902123	-0.642702	-0.14063	0.502073
Idua	1.73313	2.56457	0.797536	1.36153	0.563991
Ier2	26.393	43.3065	4.72236	5.43668	0.714322
Ier3	296.445	586.573	8.21164	9.19618	0.984534
Ier5	30.2554	42.7916	4.91936	5.41942	0.500065
Ifi202b	0.115229	0.308463	-3.05614	-1.67363	1.38251
Ifi205	0.0975717	0.221769	-3.2853	-2.1407	1.14459
Ifi27	2.47183	6.37627	1.30849	2.67384	1.36535
Ifi35	7.97085	12.6865	2.99564	3.66579	0.670152
Ifit1	0.0376295	0.201104	-4.552	-2.27856	2.27345
Ifit3	0.102141	0.273267	-3.22242	-1.84546	1.37696
Ifitm5	0.273014	0.537543	-1.84677	-0.882191	0.96458
Ifnb1	0	0.159511	-7.64386	-2.60374	5.04011
Ifng	0	0.0446405	-7.64386	-4.33234	3.31152
Ifnz	0	0.106548	-7.64386	-3.16426	4.47959
Ifrd1	70.5444	121.203	6.14056	6.92134	0.780779
Ift43	14.9077	23.9967	3.89847	4.58506	0.686595
Ift81	6.92024	9.86397	2.79186	3.3029	0.511035
Igf2os	0	0.00970903	-7.64386	-6.08715	1.5567
Igfbp6	0.295795	0.700977	-1.73315	-0.502307	1.23084
Ighmbp2	4.39096	7.49846	2.13618	2.90756	0.771378
Igsf23	0.0812783	0.184555	-3.53486	-2.39931	1.13555
Ihh	0.0613377	0.119238	-3.91403	-3.00882	0.905206
Il11	0.167512	0.760854	-2.53523	-0.384859	2.15037
Il12b	0	0.0193437	-7.64386	-5.36031	2.28355
Il12rb1	0.326101	0.733585	-1.59466	-0.437164	1.15749
Il13ra2	0.397327	1.05963	-1.31356	0.0903521	1.40391
Il15ra	0.0656001	0.114725	-3.82419	-3.0622	0.761982
Il18	0	0.340021	-7.64386	-1.53524	6.10861
Il1a	1.37175	8.66237	0.461267	3.11559	2.65433
Il1b	0.0408236	0.0796511	-4.44777	-3.56233	0.885438
Il1bos	0.038456	0.112499	-4.5243	-3.08928	1.43502
Il1f10	0	0.13669	-7.64386	-2.81919	4.82467
Il1f5	0	0.0293906	-7.64386	-4.86184	2.78201
Il1f6	1.21694	2.9161	0.289173	1.54651	1.25734
Il1rl1	0.2977	0.733654	-1.72404	-0.437029	1.28701
Il1rl2	0	0.0510591	-7.64386	-4.15691	3.48695
Il1rn	5.95785	12.2511	2.576	3.61543	1.03943
Il23a	9.24786	19.5496	3.2099	4.28944	1.07954
Il2rb	0.0918824	0.196403	-3.36762	-2.31184	1.05578
Il6	0	0.10156	-7.64386	-3.23026	4.41359
Il7	0.0201665	0.117603	-5.31235	-3.02793	2.28442
Ildr1	0.229183	0.429304	-2.09429	-1.20322	0.891069
Impact	11.2902	16.69	3.49764	4.06134	0.563706
Inca1	0.209452	1.18937	-2.22127	0.25625	2.47752
Ing3	7.07806	10.6622	2.82437	3.41511	0.590737
Ing4	16.1185	23.8196	4.01109	4.57438	0.563287
Inhbe	0	0.0692111	-7.64386	-3.75222	3.89163
Inpp1	3.67716	5.76736	1.88055	2.52916	0.648609
Inpp5d	0	0.0292295	-7.64386	-4.86862	2.77524
Inpp5j	1.68067	2.44752	0.753322	1.29426	0.540943
Insl6	1.41153	3.38072	0.502361	1.75946	1.2571
Insm1	5.29714	14.093	2.40657	3.81742	1.41084
Ints12	14.6705	28.1146	3.87534	4.8135	0.938166
Ip6k2	9.06248	13.4757	3.1807	3.75282	0.572122
Iqca	0.0304638	0.088747	-4.81751	-3.41508	1.40243
Iqcc	3.07265	4.57433	1.62183	2.19514	0.573307
Irak2	8.2178	11.8631	3.03963	3.56902	0.529387
Irak3	0.463697	1.38333	-1.09327	0.473351	1.56662
Irf2bpl	24.7755	35.3547	4.63113	5.14403	0.512901
Irf6	3.09475	5.57593	1.63215	2.48051	0.848354
Irf7	0.314972	0.501556	-1.64398	-0.981206	0.662776
Irf8	0.156049	0.235809	-2.63443	-2.05404	0.58039
Irgm2	0.193648	0.362567	-2.33171	-1.44392	0.887793
Irgq	8.8293	12.686	3.14312	3.66573	0.522618
Irx3	21.1351	42.9634	4.40191	5.4252	1.02329
Irx5	7.31046	14.5968	2.87095	3.86807	0.997126
Isg15	0.0832261	0.899991	-3.50265	-0.144025	3.35863
Isl1	0	0.019168	-7.64386	-5.37076	2.2731
Isl2	0.139088	0.514404	-2.79498	-0.945071	1.84991
Isoc2b	0.106558	0.729307	-3.16413	-0.445545	2.71859
Ispd	0.229086	0.366666	-2.09489	-1.42792	0.666968
Itfg2	11.128	17.9607	3.47677	4.16717	0.690403
Itga7	10.4252	15.4152	3.38269	3.94675	0.564055
Itgal	0.00911908	0.0176911	-6.14621	-5.46173	0.68448
Itgb1bp2	0.252605	0.616215	-1.95677	-0.686835	1.26993
Itgb2l	0	0.0184343	-7.64386	-5.41523	2.22862
Itgb8	0	0.0768817	-7.64386	-3.61032	4.03354
Itpk1	13.5372	22.0234	3.75939	4.46129	0.701903
Itpka	0.0285643	0.0834134	-4.89693	-3.49959	1.39734
Itpr2	1.62663	2.30535	0.706314	1.20811	0.501797
Itprip	25.2686	39.2232	4.65956	5.29382	0.63426
Jakmip2	0.0276891	0.0537625	-4.93505	-4.08896	0.846086
Jdp2	6.6874	29.439	2.74252	4.8799	2.13738
Jph2	0	0.0449705	-7.64386	-4.32278	3.32108
Jph3	0.024753	0.0720733	-5.07082	-3.69763	1.3732
Jsrp1	0	0.0982929	-7.64386	-3.27519	4.36867
Jun	13.5842	29.2895	3.76439	4.87256	1.10817
Jund	60.2103	124.129	5.91206	6.95575	1.0437
Kbtbd13	0	0.0160853	-7.64386	-5.56762	2.07624
Kbtbd3	0.605782	1.29473	-0.711271	0.378212	1.08948
Kcna4	0.0493264	0.0765649	-4.2022	-3.61591	0.586295
Kcna7	0.0417484	0.094572	-4.41894	-3.32812	1.09082
Kcnc2	0	0.00740738	-7.64386	-6.33266	1.3112
Kcnd3	0	0.00637103	-7.64386	-6.45849	1.18536
Kcne2	0	0.0299468	-7.64386	-4.8387	2.80516
Kcnh3	0.0135493	0.0263067	-5.75249	-4.99738	0.755107
Kcnh4	0	0.0124127	-7.64386	-5.84372	1.80014
Kcnh5	0	0.0115188	-7.64386	-5.91975	1.72411
Kcnh6	0	0.0167924	-7.64386	-5.52003	2.12383
Kcnh7	0	0.0370925	-7.64386	-4.57029	3.07356
Kcnj10	0.00879733	0.0170658	-6.17947	-5.50204	0.677423
Kcnj4	0.117571	0.617434	-3.02831	-0.684007	2.3443
Kcnk2	0.171663	0.287951	-2.50093	-1.77127	0.729659
Kcnn1	0.23856	0.416735	-2.03765	-1.24559	0.79206
Kcnq4	0	0.115709	-7.64386	-3.05039	4.59346
Kcnrg	0.028744	0.0559566	-4.88923	-4.03607	0.853151
Kcnt2	0.0487932	0.118389	-4.21643	-3.01871	1.19772
Kcnu1	0	0.0667978	-7.64386	-3.79992	3.84394
Kcnv2	0	0.00911202	-7.64386	-6.14693	1.49692
Kcp	0.0195451	0.0663636	-5.34842	-3.80867	1.53975
Kctd14	0.258765	0.417204	-1.92267	-1.24399	0.678687
Kctd15	0.0207425	0.060487	-5.2797	-3.93265	1.34706
Kctd16	0	0.0385102	-7.64386	-4.5225	3.12135
Kctd21	1.55445	2.24867	0.641037	1.17228	0.531239
Kctd4	0.0488681	0.332242	-4.21443	-1.56814	2.64628
Kdelr3	7.57658	13.8145	2.9225	3.78863	0.866135
Kdm4a	18.4483	32.5304	4.20581	5.02394	0.818131
Kdm5b	11.3748	16.2362	3.5084	4.02159	0.513183
Kdm6b	10.9091	17.8897	3.44812	4.16146	0.713339
Kdm7a	1.8699	3.40662	0.906814	1.77046	0.863643
Kdr	1.09916	2.04762	0.142949	1.03747	0.894517
Khdrbs2	0.0793808	0.154848	-3.56694	-2.64523	0.921714
Kif17	0.0159039	0.0846288	-5.58008	-3.47989	2.10019
Kif1a	0.74008	1.68322	-0.424533	0.755503	1.18004
Kif21b	2.77717	4.33893	1.47621	2.119	0.64279
Klc3	4.75936	10.0424	2.25228	3.32875	1.07647
Klc4	6.87672	13.9175	2.78277	3.79935	1.01658
Klf11	1.50257	3.6457	0.592225	1.86817	1.27595
Klf15	0.0219149	0.213064	-5.21545	-2.19718	3.01827
Klf17	0	0.0262133	-7.64386	-5.0017	2.64216
Klf2	0.71056	1.18962	-0.482855	0.256552	0.739407
Klf4	21.1049	44.6749	4.39985	5.48155	1.08171
Klf5	29.7037	43.0597	4.89281	5.42843	0.53562
Klf6	37.873	66.718	5.24329	6.06011	0.816824
Klf9	8.72622	14.5922	3.12618	3.86762	0.741437
Klhdc8b	0.39977	0.64717	-1.30483	-0.61668	0.688146
Klhl10	0.0506747	0.197192	-4.16683	-2.3062	1.86063
Klhl24	4.23142	6.8634	2.08285	2.77997	0.697128
Klhl33	0	0.0957973	-7.64386	-3.31047	4.33339
Klra15	0	0.467918	-7.64386	-1.08034	6.56352
Klra19	0	0.144892	-7.64386	-2.738	4.90585
Klra7	0	0.0535404	-7.64386	-4.09442	3.54943
Klrb1f	0	0.0330713	-7.64386	-4.71515	2.9287
Klrg1	0	0.0385437	-7.64386	-4.52139	3.12246
Klrg2	5.75286	9.12921	2.52553	3.19128	0.665747
Kremen2	0.023945	0.0698659	-5.11054	-3.73955	1.37099
Krt13	0.206514	0.604446	-2.24117	-0.71443	1.52675
Krt14	2.48632	3.58619	1.31691	1.84446	0.527552
Krt16	0.303056	1.73879	-1.69874	0.802226	2.50096
Krt2	0	0.0184727	-7.64386	-5.41287	2.23098
Krt23	18.4351	75.834	4.20477	6.24487	2.04009
Krt36	0.156823	0.336001	-2.62751	-1.55215	1.07536
Krt39	0.036816	0.10767	-4.5798	-3.14982	1.42998
Krt4	0	0.0230944	-7.64386	-5.15357	2.49028
Krt6a	1.22647	2.9704	0.300381	1.57308	1.2727
Krt85	0.168658	0.268895	-2.52568	-1.86831	0.657374
Krtap1-3	0	0.0630676	-7.64386	-3.87689	3.76697
Krtap1-5	0.0548765	0.161013	-4.06187	-2.59063	1.47123
Krtap4-16	0.0614345	0.120313	-3.91192	-2.99639	0.915532
Krtap5-4	0	0.0562606	-7.64386	-4.0289	3.61496
Krtcap3	7.99988	12.1445	3.00088	3.60283	0.601945
Krtdap	0	0.181902	-7.64386	-2.41965	5.22421
Kynu	0	0.0155163	-7.64386	-5.60709	2.03677
L3mbtl4	0.0314542	0.0508634	-4.77777	-4.16195	0.615818
LOC100504703	2.43493	4.9594	1.28684	2.31162	1.02478
LOC105246506	0.0365767	0.124383	-4.58808	-2.95028	1.6378
LOC106740	3.8398	11.4631	1.94291	3.51955	1.57665
Lalba	0	0.0854457	-7.64386	-3.4668	4.17705
Lamb2	16.265	23.114	4.02414	4.53101	0.506865
Lamb3	48.8957	71.4474	5.61178	6.15891	0.547127
Lamc3	0.119902	0.201555	-3.00113	-2.2754	0.725729
Lars	48.9588	93.228	5.61364	6.54277	0.929125
Lbx2	0	0.0735345	-7.64386	-3.67053	3.97333
Lce1g	1.0867	5.57335	0.126576	2.47984	2.35326
Lce1i	0	0.0857764	-7.64386	-3.46154	4.18232
Lck	0.269449	1.40579	-1.86539	0.496503	2.36189
Lcn2	19.1715	33.2372	4.26127	5.05494	0.793676
Lcp1	0.426281	0.84011	-1.2133	-0.242789	0.970511
Lcp2	0	0.0424193	-7.64386	-4.39838	3.24547
Ldhal6b	0.0738697	0.180033	-3.66439	-2.43415	1.23024
Lekr1	0.874836	1.4416	-0.184693	0.532666	0.71736
Lemd1	0	0.0576515	-7.64386	-3.99651	3.64735
Leng9	2.12769	3.72347	1.09267	1.89858	0.805909
Leo1	18.6168	27.7827	4.21892	4.79637	0.577454
Leprotl1	18.4646	27.6999	4.20708	4.79207	0.584989
Letm2	0.362399	0.939944	-1.44458	-0.0816993	1.36288
Lgals6	0	0.244154	-7.64386	-2.00489	5.63897
Lgals8	13.369	19.0459	3.74136	4.25179	0.510428
Lgi2	0.106356	0.155234	-3.16675	-2.64175	0.525001
Lhx2	0	0.0658104	-7.64386	-3.81989	3.82396
Lif	17.2538	30.9116	4.10926	4.95031	0.84105
Lilr4b	0	0.464537	-7.64386	-1.09069	6.55317
Lilrb4a	0.0708673	0.242104	-3.72038	-2.01681	1.70357
Limk2	7.12345	10.6993	2.83359	3.42012	0.58653
Lims2	0.648431	5.89348	-0.613893	2.56034	3.17424
Lin28a	0	0.0135682	-7.64386	-5.75102	1.89283
Lin37	12.5303	21.0862	3.64792	4.39857	0.750645
Lin7a	0	0.0078541	-7.64386	-6.28163	1.36223
Lin7b	0.0897554	0.353363	-3.39965	-1.48051	1.91914
Lincpint	0.121381	0.293276	-2.98415	-1.74528	1.23887
Lingo1	0.0444381	0.115064	-4.33823	-3.05812	1.28011
Lipc	0	0.0259786	-7.64386	-5.01258	2.63127
Lipo1	0.564007	0.901515	-0.813482	-0.141597	0.671884
Litaf	33.8626	62.1717	5.08183	5.9583	0.876468
Lmcd1	0.240528	0.439112	-2.02604	-1.171	0.855036
Lmx1a	0.0146093	0.0709252	-5.67232	-3.71928	1.95304
Lonp1	113.232	188.95	6.8232	7.5619	0.738697
Lonrf1	2.81366	6.47524	1.49501	2.69605	1.20104
Lonrf3	5.48617	9.84538	2.45711	3.30018	0.843066
Lpcat2b	0	0.0172568	-7.64386	-5.48961	2.15425
Lpin2	16.6014	31.5824	4.05367	4.98128	0.92761
Lppr2	0.733386	1.14516	-0.437553	0.201835	0.639387
Lppr4	0	0.00809338	-7.64386	-6.25502	1.38884
Lrg1	0	0.0389161	-7.64386	-4.50911	3.13475
Lrif1	8.67636	13.4236	3.11792	3.74724	0.629316
Lrig3	1.15461	1.75588	0.21364	0.816297	0.602657
Lrp3	0.0120791	0.046892	-5.87162	-4.26834	1.60328
Lrrc17	0.207784	0.516368	-2.23254	-0.939626	1.29291
Lrrc25	0	0.0837144	-7.64386	-3.49469	4.14917
Lrrc39	0.146497	0.304803	-2.72264	-1.69058	1.03206
Lrrc41	19.5698	28.0441	4.29093	4.80988	0.518957
Lrrc43	0.0251379	0.0734143	-5.05228	-3.67274	1.37954
Lrrc46	0.20954	0.654263	-2.22068	-0.601074	1.61961
Lrrc48	0.193898	0.323503	-2.3299	-1.60602	0.723878
Lrrc57	3.85065	6.32529	1.94697	2.66227	0.715297
Lrrc6	0	0.0236997	-7.64386	-5.12282	2.52104
Lrrc61	1.1841	1.77962	0.24987	0.835617	0.585747
Lrrc69	0	0.044506	-7.64386	-4.33625	3.3076
Lrrc8d	22.6211	33.8831	4.49992	5.08271	0.582791
Lrriq1	0	0.0571086	-7.64386	-4.00906	3.63479
Lrrtm2	0.0334955	0.186796	-4.69917	-2.38236	2.31681
Lrrtm3	0	0.0121806	-7.64386	-5.86308	1.78078
Lsm10	10.4121	16.1252	3.38088	4.01169	0.630811
Lsmem1	0	0.0887446	-7.64386	-3.41512	4.22874
Ltb4r2	0	0.217098	-7.64386	-2.17073	5.47312
Ltk	0.416262	1.14085	-1.24721	0.196418	1.44363
Lvrn	0.0151864	0.0294937	-5.63047	-4.85752	0.772949
Lxn	18.5441	27.2144	4.21328	4.76656	0.553286
Ly6c2	0	0.0755404	-7.64386	-3.63414	4.00971
Ly6g6c	0.182103	0.416011	-2.4181	-1.24807	1.17003
Ly96	8.24559	16.0708	3.0445	4.00682	0.962321
Lyg2	0	0.018858	-7.64386	-5.38938	2.25447
Lynx1	2.38184	3.47344	1.2551	1.79844	0.543339
Lyrm5	3.16887	5.12612	1.66624	2.35927	0.693031
Lysmd1	2.52243	3.64748	1.33767	1.86888	0.531205
Lyve1	0	0.018519	-7.64386	-5.41003	2.23383
Lzts1	0	0.0279448	-7.64386	-4.92381	2.72005
Lzts2	30.463	48.4949	4.92922	5.59991	0.670687
Maats1	0	0.121603	-7.64386	-2.98162	4.66224
Mad2l1bp	14.0812	20.9903	3.81621	4.39199	0.575784
Mafa	0.157093	0.358334	-2.62511	-1.46063	1.16447
Mafb	0.416882	0.921172	-1.24509	-0.110648	1.13444
Maff	27.833	50.2143	4.79898	5.65017	0.851186
Mafk	13.7499	19.6712	3.78187	4.29838	0.516506
Manbal	23.4163	37.2812	4.54975	5.22057	0.670821
Maneal	0	0.0352691	-7.64386	-4.63418	3.00967
Map10	0.0821476	0.18608	-3.5204	-2.38775	1.13264
Map1lc3a	10.9099	31.9553	3.44823	4.99821	1.54998
Map1lc3b	47.2191	80.1804	5.56145	6.32527	0.763816
Map3k6	3.75845	6.68076	1.91206	2.74109	0.829036
Map3k8	0.178974	0.328556	-2.44243	-1.584	0.858427
Mapk4	0.498243	0.835889	-0.990673	-0.250013	0.74066
Mapk6	46.0031	70.2297	5.52382	6.13411	0.610296
Mapk8ip2	0	0.0133274	-7.64386	-5.76985	1.874
Mapkapk5	17.348	25.3149	4.11711	4.6622	0.545087
Mapre3	5.03356	7.64853	2.33301	2.93613	0.603114
March11	0	0.0332504	-7.64386	-4.70838	2.93547
Mark4	12.0358	17.0552	3.58986	4.09256	0.502703
Mars	63.8056	108.432	5.99572	6.76071	0.764989
Mast1	0.310467	0.574134	-1.66444	-0.788031	0.876408
Matk	0.027907	0.326049	-4.92546	-1.59488	3.33058
Matn4	0.0224623	0.0772746	-5.1864	-3.60341	1.58299
Mbd3l2	0	0.0228326	-7.64386	-5.16708	2.47678
Mcidas	0	0.0207089	-7.64386	-5.28159	2.36227
Mcoln1	20.8159	29.4964	4.37996	4.88271	0.502751
Mcoln2	0.019999	0.0972525	-5.32199	-3.28979	2.03219
Mcoln3	0.0303855	0.0591737	-4.8207	-3.96187	0.858824
Mdk	0.354366	0.503696	-1.47647	-0.975124	0.50135
Mea1	41.6068	61.4108	5.37892	5.94054	0.561617
Med10	56.7252	84.504	5.82605	6.40103	0.574988
Med21	41.3875	59.6992	5.3713	5.89976	0.528463
Med31	7.23617	11.8429	2.85622	3.56656	0.710337
Med7	8.39226	13.568	3.06992	3.76267	0.692749
Med9os	0	0.281105	-7.64386	-1.80538	5.83847
Mef2b	0	0.158993	-7.64386	-2.60829	5.03556
Megf10	1.03304	2.49473	0.053862	1.32177	1.26791
Mei4	0.0641076	0.57592	-3.85501	-0.783589	3.07142
Meis3	3.29934	4.96702	1.72436	2.31383	0.58947
Mesp2	0	0.0257371	-7.64386	-5.02388	2.61998
Mettl21b	0.0928505	0.274315	-3.35328	-1.84004	1.51324
Mettl24	0	0.0674115	-7.64386	-3.78764	3.85622
Mettl7b	3.45138	7.2202	1.78926	2.85304	1.06378
Mex3d	29.0251	42.3489	4.85948	5.40442	0.544945
Mff	21.0732	31.2199	4.39768	4.96463	0.566945
Mfng	0.0281081	0.0820743	-4.91667	-3.52161	1.39506
Mfsd6l	0.0493625	0.0960316	-4.20124	-3.30712	0.894123
Mfsd7c	0.226727	0.371461	-2.1095	-1.40943	0.700074
Mgam	0	0.0282504	-7.64386	-4.91048	2.73337
Mgarp	2.07212	5.08503	1.05458	2.34767	1.29309
Mgea5	43.8317	69.3348	5.45407	6.11561	0.661544
Mgst1	35.0874	50.1131	5.13309	5.64726	0.514173
Mia	0.253439	0.502187	-1.9521	-0.97941	0.972694
Mib2	3.25156	11.4157	1.70335	3.51358	1.81023
Mill2	0.105321	0.293578	-3.18022	-1.74382	1.4364
Milr1	0.125269	0.186771	-2.94043	-2.38254	0.557891
Mip	0.0236235	0.0918986	-5.12666	-3.36738	1.75928
Mir22hg	5.36803	11.0516	2.42574	3.46684	1.0411
Mira	0.0774499	0.152118	-3.60034	-2.67008	0.930259
Mirg	0	0.0408537	-7.64386	-4.44682	3.19704
Misp	10.8579	15.7202	3.44134	3.97501	0.533669
Mkrn2os	0.431492	0.99116	-1.19597	-0.00555061	1.19042
Mkrn3	0.684118	1.34867	-0.537177	0.436876	0.974053
Mlkl	19.6991	30.5304	4.30042	4.93241	0.631987
Mllt11	5.78911	10.5974	2.53459	3.40632	0.871732
Mlycd	1.42544	3.3838	0.516459	1.76077	1.24432
Mmel1	0	0.0325487	-7.64386	-4.73509	2.90876
Mmp10	0.0898438	1.95362	-3.3983	0.969838	4.36814
Mmp12	0.0134537	0.0391809	-5.75995	-4.50043	1.25951
Mmp13	8.9884	46.5667	3.16887	5.54138	2.37252
Mmp1b	0.0255496	0.124282	-5.0327	-2.95141	2.0813
Mmp27	0	0.0614725	-7.64386	-3.9111	3.73276
Mmp3	0.488031	3.85638	-1.02025	1.94912	2.96937
Mnt	11.6478	18.7709	3.5426	4.23081	0.688205
Mocos	1.53777	2.82157	0.625523	1.49905	0.873529
Morn3	0.0634802	0.124365	-3.86817	-2.95048	0.917689
Mospd1	8.41974	13.9502	3.07463	3.80273	0.728099
Mospd4	0	0.066275	-7.64386	-3.81046	3.8334
Mpp3	0.190583	0.302953	-2.35415	-1.69922	0.654929
Mpp4	0.0396013	0.0623021	-4.48677	-3.8932	0.593566
Mpped2	0	0.041014	-7.64386	-4.44178	3.20207
Mpz	0	0.0747369	-7.64386	-3.64861	3.99525
Mrap2	0.0530512	0.154869	-4.10653	-2.64504	1.46149
Mreg	0.320125	0.680595	-1.62093	-0.544572	1.07636
Mrgprh	0	0.027787	-7.64386	-4.93073	2.71312
Mrln	0	0.189444	-7.64386	-2.36257	5.28128
Mroh6	0.346858	0.54726	-1.50693	-0.85658	0.650354
Mroh8	0.0562116	0.150078	-4.03005	-2.68893	1.34112
Mrps31	15.0016	21.8933	3.90753	4.45275	0.545222
Ms4a4b	0.130506	0.254753	-2.88357	-1.94479	0.938784
Ms4a4d	0	0.177295	-7.64386	-2.45565	5.1882
Ms4a8a	0.0522446	0.306435	-4.12672	-1.683	2.44372
Msantd4	12.7455	18.2321	3.67248	4.1888	0.516323
Msi1	0	0.165755	-7.64386	-2.55	5.09386
Msmo1	119.576	171.004	6.90184	7.41793	0.516084
Mst1	0.615978	2.41692	-0.687386	1.27615	1.96354
Mst1r	1.23673	1.98986	0.312352	0.996288	0.683936
Msx2	0.140364	0.227505	-2.78226	-2.10467	0.677592
Mt1	180.037	442.794	7.49219	8.79051	1.29832
Mt2	57.3677	209.623	5.84229	7.71169	1.8694
Mt4	0	0.244234	-7.64386	-2.00443	5.63943
Mtag2	0.0955437	0.470768	-3.31411	-1.07167	2.24244
Mterf1a	2.69884	4.01226	1.43501	2.00621	0.571202
Mterf2	3.86669	5.73278	1.95296	2.52049	0.567529
Mterf4	4.68014	6.98794	2.22809	2.8059	0.577807
Mtg1	6.85265	9.72459	2.77771	3.28238	0.504665
Mthfd2	31.1034	99.5018	4.95923	6.63672	1.67749
Mthfr	3.61968	8.6735	1.85785	3.11745	1.25959
Mtl5	0.164138	0.263243	-2.56373	-1.89839	0.66534
Mtnr1a	0	0.0343858	-7.64386	-4.66618	2.97768
Mtss1	18.6293	27.9737	4.21989	4.80626	0.586368
Mustn1	0.141105	0.229682	-2.77492	-2.09122	0.683702
Mvd	22.6889	32.7931	4.50423	5.03554	0.531308
Mvp	28.361	44.2471	4.82609	5.46767	0.641583
Mx1	0	0.0535388	-7.64386	-4.09446	3.54939
Mxd1	3.43036	7.78227	1.78046	2.96112	1.18066
Mxd4	2.30471	5.97173	1.20771	2.57936	1.37164
Mxi1	10.7811	17.1547	3.4311	4.10095	0.669851
Mxra8	5.45008	9.43017	2.4476	3.23805	0.790448
Myc	73.582	117.12	6.20138	6.87191	0.670526
Mycbpap	0.941364	1.81244	-0.0795329	0.861908	0.941441
Myf6	0	0.0428697	-7.64386	-4.38474	3.25911
Myh1	0	0.0152665	-7.64386	-5.62476	2.0191
Myl4	0.135215	0.198825	-2.83429	-2.2946	0.53969
Myo15	0.00590672	0.0229052	-6.51864	-5.16332	1.35532
Myo1g	0	0.0143272	-7.64386	-5.69322	1.95063
Myo3b	0	0.0146676	-7.64386	-5.66804	1.97582
Myo5c	10.4746	15.1804	3.38951	3.92461	0.535101
Myo7b	0.0931571	0.152868	-3.34876	-2.66321	0.685554
Myom2	0.038555	0.177659	-4.52102	-2.45278	2.06824
Mypn	0	0.00880596	-7.64386	-6.17856	1.46529
Myt1l	0.00662745	0.0128571	-6.42632	-5.80736	0.618963
Naa11	0.0289781	0.0562718	-4.87925	-4.02863	0.850618
Nabp1	11.2481	18.5435	3.49225	4.21323	0.72098
Nagk	11.7264	17.8658	3.5523	4.15953	0.607229
Nags	0	0.0233131	-7.64386	-5.14239	2.50147
Naip1	0.0177517	0.10331	-5.45788	-3.20676	2.25112
Nap1l2	0.324116	1.24129	-1.60333	0.31764	1.92097
Nap1l3	0.157241	0.271561	-2.62379	-1.85433	0.769459
Napa	49.1589	78.0467	5.61953	6.28636	0.666831
Naprt	2.25538	3.67568	1.17657	1.87997	0.703407
Nars	95.0814	262.243	6.57117	8.03479	1.46362
Nat6	4.92832	10.4587	2.30256	3.38732	1.08476
Nat9	5.25016	13.599	2.39373	3.76596	1.37222
Natd1	3.1368	5.94206	1.65159	2.57218	0.920585
Nbr1	26.63	38.5249	4.73525	5.26791	0.532655
Ncan	0	0.00637377	-7.64386	-6.45815	1.18571
Nck1	11.2313	17.5056	3.4901	4.13016	0.640061
Ncoa4	31.7673	53.9628	4.9897	5.75403	0.764329
Ndel1	17.7101	28.9131	4.14691	4.8539	0.706993
Ndrg1	33.0562	122.446	5.04707	6.93606	1.88899
Ndrg4	1.16032	3.31587	0.220726	1.73156	1.51084
Ndufs5	2.01969	9.25411	1.0177	3.21087	2.19317
Neat1	183.082	315.94	7.51639	8.30353	0.787144
Necab2	0.025926	0.100897	-5.01504	-3.23927	1.77577
Nefl	0.0254926	0.0744023	-5.0354	-3.65468	1.38072
Neil1	2.89592	6.4453	1.53651	2.68937	1.15286
Neil2	0.080374	0.156422	-3.55006	-2.63109	0.918969
Neu1	22.677	32.4427	4.50348	5.02004	0.516568
Neurod1	0	0.0388741	-7.64386	-4.51049	3.13337
Nfam1	0	0.0123341	-7.64386	-5.85024	1.79361
Nfe2l1	65.2589	115.634	6.02821	6.85348	0.825271
Nfe2l2	63.8548	109.131	5.99684	6.76998	0.773147
Nfil3	5.84161	13.7095	2.5476	3.77763	1.23003
Nfkbib	19.4455	32.8498	4.28174	5.03803	0.756297
Nfkbil1	14.8437	21.5267	3.89226	4.42839	0.536126
Ngp	0	0.04681	-7.64386	-4.27063	3.37323
Ngrn	22.7121	36.1878	4.50571	5.17763	0.671924
Nhlh2	0	0.0141172	-7.64386	-5.70898	1.93487
Nhlrc1	0.657447	1.17185	-0.594123	0.23493	0.829054
Nit1	22.5872	33.0189	4.49775	5.04544	0.547686
Nkain3	0.0170544	0.0496992	-5.50279	-4.19234	1.31045
Nkapl	0.439669	0.928624	-1.1692	-0.0990864	1.07011
Nkd2	0.106199	0.471429	-3.16878	-1.06967	2.09912
Nkiras2	3.59591	6.99642	1.84836	2.80765	0.959286
Nkpd1	0.0359304	0.104724	-4.61068	-3.18805	1.42263
Nkx2-9	0	0.0425404	-7.64386	-4.3947	3.24915
Nlrc5	0.00678949	0.0658306	-6.40635	-3.81948	2.58687
Nlrp10	0.128376	0.2076	-2.90643	-2.23379	0.672643
Nlrp12	0	0.0215371	-7.64386	-5.23585	2.40801
[truncated: 1,196 more rows]

## Sheet: Down-regulated_Fold_change
	raw Data (FPKM)		Normalized Data (log2)		Fold_Change (log2)
Gene symbol	KPR-	KPRrestored	KPR-	KPRrestored	(KPRrestored)- (KPR-)
1110019D14Rik	0.0354194	0	-4.62881	-7.64386	-3.01505
1110032F04Rik	0.0964537	0.0374925	-3.30111	-4.55665	-1.25554
1110058D11Rik	0.198639	0	-2.29591	-7.64386	-5.34794
1190002N15Rik	6.23276	3.15505	2.64103	1.65995	-0.981081
1500009L16Rik	0.0926412	0	-3.35637	-7.64386	-4.28749
1500015O10Rik	0.134223	0	-2.84453	-7.64386	-4.79933
1600029O15Rik	0.0285465	0	-4.89769	-7.64386	-2.74616
1700001C19Rik	0.0969475	0.0393613	-3.2941	-4.49455	-1.20045
1700001G17Rik	0.737148	0.459798	-0.430221	-1.10532	-0.675103
1700001J11Rik	0.121374	0	-2.98423	-7.64386	-4.65963
1700001P01Rik	0.109495	0	-3.12664	-7.64386	-4.51721
1700003M02Rik	0.090915	0	-3.3821	-7.64386	-4.26176
1700007J10Rik	0.55627	0.0494206	-0.833233	-4.1997	-3.36647
1700007K13Rik	0.0765429	0	-3.6163	-7.64386	-4.02756
1700011A15Rik	0.394001	0.2574	-1.32554	-1.93016	-0.604625
1700011H14Rik	0.0952447	0	-3.3184	-7.64386	-4.32545
1700012C14Rik	0.156329	0	-2.63192	-7.64386	-5.01193
1700012L04Rik	0.143264	0	-2.75376	-7.64386	-4.8901
1700013D24Rik	0.139372	0	-2.79214	-7.64386	-4.85172
1700015E13Rik	0.180573	0	-2.42994	-7.64386	-5.21391
1700016G22Rik	0.47297	0.233949	-1.06501	-2.06523	-1.00022
1700016H13Rik	0.157565	0.0612371	-2.62091	-3.91622	-1.29531
1700018L02Rik	3.29713	1.84518	1.7234	0.887666	-0.835731
1700019D03Rik	0.0728849	0	-3.68251	-7.64386	-3.96134
1700020A23Rik	0.143262	0	-2.75378	-7.64386	-4.89008
1700022I11Rik	0.0389966	0	-4.50646	-7.64386	-3.13739
1700023F06Rik	0.184349	0.0450033	-2.40088	-4.32183	-1.92095
1700024F13Rik	0.395459	0	-1.32027	-7.64386	-6.32358
1700024P16Rik	0.0319582	0.0155153	-4.75796	-5.60716	-0.849194
1700025G04Rik	3.86234	2.37805	1.95134	1.25281	-0.698532
1700028I16Rik	0.107686	0.0526505	-3.14962	-4.11652	-0.966903
1700029I15Rik	0.559845	0	-0.824073	-7.64386	-6.81978
1700030L20Rik	0.587523	0.172506	-0.755057	-2.49406	-1.739
1700047E10Rik	0.379115	0.250388	-1.38039	-1.96924	-0.588848
1700061G19Rik	0.142421	0.0988769	-2.76199	-3.26705	-0.505067
1700065D16Rik	0.23993	0	-2.02956	-7.64386	-5.6143
1700084C01Rik	0.0370845	0	-4.57057	-7.64386	-3.07329
1700084E18Rik	1.98895	0.797254	0.995629	-0.317869	-1.3135
1700091H14Rik	0.387164	0.113266	-1.35047	-3.07989	-1.72942
1700093K21Rik	0.0574954	0	-4.00011	-7.64386	-3.64375
1700100I10Rik	0.0724143	0	-3.69126	-7.64386	-3.9526
1700109K24Rik	1.24274	0.708483	0.319317	-0.487049	-0.806366
1700110C19Rik	0.0887116	0	-3.41563	-7.64386	-4.22823
1700112E06Rik	0.129843	0	-2.89065	-7.64386	-4.75321
1700112J05Rik	0.385293	0	-1.35737	-7.64386	-6.28649
1700120C14Rik	1.23026	0.248074	0.304815	-1.98237	-2.28718
1700120E14Rik	0.0265119	0	-4.98796	-7.64386	-2.6559
1810007C17Rik	0.0911859	0	-3.37803	-7.64386	-4.26583
1810010D01Rik	0.439483	0	-1.1698	-7.64386	-6.47406
1810034E14Rik	0.344061	0.223276	-1.51845	-2.13115	-0.6127
1810041H14Rik	0.437832	0	-1.17517	-7.64386	-6.46869
2010003K11Rik	0.0952447	0	-3.3184	-7.64386	-4.32545
2010009K17Rik	0.126034	0	-2.93199	-7.64386	-4.71187
2010111I01Rik	7.45459	4.08595	2.8991	2.03244	-0.86666
2010300C02Rik	1.13425	0.705238	0.188084	-0.493626	-0.68171
2010308F09Rik	0.171294	0	-2.50394	-7.64386	-5.13991
2210039B01Rik	1.64827	0.644832	0.725322	-0.621861	-1.34718
2310001K24Rik	0.179869	0	-2.43542	-7.64386	-5.20843
2310007B03Rik	9.42943	3.85827	3.23794	1.94982	-1.28811
2310039L15Rik	0.734871	0.103611	-0.434654	-3.20276	-2.7681
2400006E01Rik	0.0535909	0	-4.09318	-7.64386	-3.55068
2500002B13Rik	4.56071	2.91197	2.19084	1.54447	-0.646369
2500004C02Rik	2.19062	1.47381	1.13463	0.564437	-0.570192
2510003B16Rik	0.534853	0.132635	-0.889361	-2.86108	-1.97172
2610027K06Rik	0.237425	0.125913	-2.04439	-2.93332	-0.88893
2610042L04Rik	0.0272542	0	-4.95437	-7.64386	-2.68949
2610316D01Rik	0.0639237	0	-3.85886	-7.64386	-3.785
2610507B11Rik	73.9389	47.2158	6.20836	5.56135	-0.647009
2700038G22Rik	10.4188	6.74346	3.38181	2.75456	-0.627251
2700049A03Rik	4.73445	2.93881	2.24472	1.55768	-0.687035
2700070H01Rik	0.0297145	0	-4.84832	-7.64386	-2.79554
2810001G20Rik	2.70009	1.48436	1.43568	0.574693	-0.860984
2810408I11Rik	8.57722	5.95443	3.10135	2.57517	-0.526177
2810417H13Rik	49.8493	27.0021	5.63965	4.75527	-0.884379
2810429I04Rik	0.724374	0.238973	-0.455269	-2.03521	-1.57994
2900060B14Rik	1.05333	0.231514	0.0817895	-2.08	-2.16179
3110021A11Rik	0.666583	0.43614	-0.574362	-1.18069	-0.606329
3110070M22Rik	0.794197	0.436508	-0.323377	-1.17949	-0.856112
3300002I08Rik	0.517791	0.10218	-0.935694	-3.22189	-2.2862
3300002P13Rik	0.0516548	0	-4.14166	-7.64386	-3.5022
3632454L22Rik	0.0409445	0.0264122	-4.44396	-4.99253	-0.548567
3830417A13Rik	0.0317123	0	-4.76759	-7.64386	-2.87626
4632428N05Rik	0.0887493	0.0574194	-3.41505	-4.00186	-0.586813
4732471J01Rik	1.3569	0.943286	0.445621	-0.0766059	-0.522227
4833415N18Rik	0.057642	0	-3.99673	-7.64386	-3.64713
4833417C18Rik	0.411171	0.240684	-1.26475	-2.02512	-0.760373
4833422C13Rik	0.378111	0.156672	-1.38417	-2.62886	-1.24469
4833427G06Rik	0.0804459	0	-3.54884	-7.64386	-4.09501
4921507L20Rik	0.170244	0.0663515	-2.51256	-3.80891	-1.29635
4921518K17Rik	0.0143707	0	-5.68998	-7.64386	-1.95388
4930404I05Rik	0.652137	0.348174	-0.605734	-1.50155	-0.895815
4930426L09Rik	0.0357515	0	-4.617	-7.64386	-3.02685
4930431F12Rik	0.0890242	0.0432788	-3.41082	-4.37247	-0.961642
4930431P03Rik	0.0220416	0	-5.20868	-7.64386	-2.43518
4930444G20Rik	0.0292398	0	-4.86818	-7.64386	-2.77567
4930444M15Rik	0.157579	0	-2.62079	-7.64386	-5.02307
4930444P10Rik	0.251428	0.108761	-1.96337	-3.13592	-1.17255
4930447K03Rik	0.0553411	0	-4.05072	-7.64386	-3.59314
4930452B06Rik	0.323627	0.209612	-1.60548	-2.2202	-0.61472
4930481A15Rik	0.29967	0.0835565	-1.71468	-3.49726	-1.78258
4930483J18Rik	0.309231	0	-1.6701	-7.64386	-5.97375
4930486L24Rik	5.60762	3.28901	2.48867	1.71984	-0.768829
4930503E14Rik	0.845128	0.329872	-0.234248	-1.57832	-1.34407
4930506A18Rik	0.0576781	0	-3.99589	-7.64386	-3.64796
4930506C21Rik	0.357099	0.0582579	-1.46554	-3.98261	-2.51707
4930528D03Rik	0.177209	0.0432463	-2.45633	-4.37344	-1.9171
4930533B01Rik	0.0556143	0	-4.0442	-7.64386	-3.59966
4930543E12Rik	0.0374795	0	-4.55709	-7.64386	-3.08677
4930545L23Rik	0.0199294	0	-5.32601	-7.64386	-2.31785
4930546K05Rik	0.0274565	0	-4.94535	-7.64386	-2.69851
4930549G23Rik	0.856353	0.363334	-0.215323	-1.44091	-1.22559
4930557A04Rik	0.132942	0	-2.85787	-7.64386	-4.78599
4930558J18Rik	0.8428	0.482248	-0.238204	-1.03727	-0.799068
4930562C15Rik	0.0252586	0	-5.04651	-7.64386	-2.59735
4930577N17Rik	0.889178	0.587658	-0.161366	-0.754728	-0.593362
4930578E11Rik	0.0236602	0	-5.12481	-7.64386	-2.51905
4930578M01Rik	0.065292	0	-3.8305	-7.64386	-3.81336
4930579G18Rik	0.875133	0.355444	-0.184207	-1.47215	-1.28795
4930592A05Rik	0.171629	0	-2.50121	-7.64386	-5.14265
4931402G19Rik	0.0222994	0	-5.19499	-7.64386	-2.44887
4931406B18Rik	0.0121562	0	-5.86513	-7.64386	-1.77873
4931406H21Rik	0.275638	0.170248	-1.83322	-2.51253	-0.679312
4931408D14Rik	0.577373	0.202492	-0.779985	-2.26887	-1.48889
4931440F15Rik	0.0149143	0	-5.65005	-7.64386	-1.9938
4933400F21Rik	0.215007	0.0521796	-2.18438	-4.12836	-1.94398
4933402D24Rik	0.265705	0.143712	-1.88521	-2.74941	-0.8642
4933404O12Rik	2.74729	1.63991	1.46063	0.718009	-0.742624
4933405E24Rik	0.104609	0	-3.18956	-7.64386	-4.45429
4933405L10Rik	0.249268	0.0487142	-1.97558	-4.21855	-2.24297
4933406C10Rik	0.0962039	0.0312346	-3.30466	-4.78649	-1.48183
4933406D12Rik	0.0862051	0	-3.45474	-7.64386	-4.18911
4933407K13Rik	2.45381	1.65372	1.29796	0.73007	-0.56789
4933408B17Rik	0.275907	0.185686	-1.83184	-2.39073	-0.558894
4933413G19Rik	0.10331	0.0504906	-3.20676	-4.17161	-0.964851
4933416C03Rik	0.022343	0	-5.19268	-7.64386	-2.45117
4933424G05Rik	0.0297338	0	-4.84752	-7.64386	-2.79634
4933428G20Rik	1.08869	0.439217	0.129204	-1.17066	-1.29987
4933431G14Rik	0.0937721	0.0608812	-3.33975	-3.92399	-0.584237
4933433C11Rik	0.0747752	0	-3.64792	-7.64386	-3.99594
4933433G19Rik	0.0535282	0	-4.09472	-7.64386	-3.54913
4933439C10Rik	3.14924	2.18534	1.65729	1.13115	-0.526138
4933440M02Rik	0.155643	0.0606243	-2.63807	-3.92963	-1.29156
5031426D15Rik	0.141631	0.00763063	-2.76974	-6.30693	-3.53719
5031434O11Rik	0.17881	0	-2.44371	-7.64386	-5.20014
5330411J11Rik	0.0318226	0	-4.76326	-7.64386	-2.88059
5330426P16Rik	1.64952	0.996583	0.726413	0.00228198	-0.724131
5430416O09Rik	0.176891	0.114444	-2.45885	-3.06559	-0.60674
5430421F17Rik	0.0657133	0.0425923	-3.82187	-4.39313	-0.571253
5430431A17Rik	0.077713	0	-3.59574	-7.64386	-4.04811
5430437J10Rik	0.047672	0	-4.24682	-7.64386	-3.39704
5430440P10Rik	0.113006	0.055278	-3.08307	-4.05222	-0.969157
5730405O15Rik	0.672103	0.395285	-0.562553	-1.3209	-0.758348
5730408K05Rik	44.4544	25.8439	5.47442	4.69203	-0.782386
5730422E09Rik	0.0909752	0.0295277	-3.38119	-4.8561	-1.47491
5830428M24Rik	0.110846	0.0541033	-3.10972	-4.08062	-0.970898
5830454E08Rik	1.27862	0.167659	0.360218	-2.534	-2.89422
6030468B19Rik	0.0524844	0	-4.12069	-7.64386	-3.52317
6030469F06Rik	0.0338472	0	-4.68605	-7.64386	-2.95781
6330415G19Rik	0.415836	0.125469	-1.24867	-2.93822	-1.68955
6430562O15Rik	0.755124	0.323511	-0.395693	-1.60599	-1.21029
6530402F18Rik	0.0335944	0.0108662	-4.69546	-5.9779	-1.28243
6530403H02Rik	0.148077	0.047906	-2.70767	-4.24042	-1.53275
6720483E21Rik	0.300431	0.146788	-1.71108	-2.71987	-1.00879
6720489N17Rik	1.71214	0.786133	0.780008	-0.338008	-1.11802
7420700N18Rik	0.0885113	0.0287237	-3.41872	-4.89009	-1.47138
8030443G20Rik	0.131334	0.0643499	-2.87478	-3.84996	-0.97518
8430408G22Rik	1.31812	0.644743	0.403944	-0.622059	-1.026
8430419L09Rik	2.58325	1.5307	1.37198	0.618896	-0.753081
8430423G03Rik	0.211416	0	-2.20812	-7.64386	-5.43574
9030404E10Rik	0.228138	0.133652	-2.10074	-2.85046	-0.749716
9030617O03Rik	0.0756807	0.0146979	-3.63163	-5.66581	-2.03418
9130015A21Rik	0.266653	0	-1.88016	-7.64386	-5.76369
9130019P16Rik	0.0106908	0	-5.99394	-7.64386	-1.64992
9130024F11Rik	0.415744	0.277472	-1.24899	-1.82382	-0.574835
9130230L23Rik	0.0366684	0	-4.5849	-7.64386	-3.05895
9230110C19Rik	0.462235	0.22515	-1.09778	-2.11935	-1.02157
9230116L04Rik	0.101506	0	-3.23099	-7.64386	-4.41286
9330133O14Rik	2.11725	1.2239	1.08559	0.297368	-0.788227
9330136K24Rik	0.241892	0.156734	-2.01805	-2.62831	-0.610257
9330159F19Rik	0.0336556	0.00816046	-4.69318	-6.24765	-1.55447
9330179D12Rik	0.208937	0.0407785	-2.22474	-4.44919	-2.22444
9430038I01Rik	2.83857	1.84911	1.5077	0.890727	-0.616976
9430060I03Rik	0.218503	0.0911965	-2.16163	-3.37787	-1.21624
9430065F17Rik	0.0522446	0	-4.12672	-7.64386	-3.51714
9430083A17Rik	0.0657427	0.0319272	-3.82127	-4.75917	-0.937897
9530026P05Rik	0.174022	0.11353	-2.48179	-3.07668	-0.594885
9530051G07Rik	0.0434938	0.0211011	-4.36606	-5.25975	-0.89369
9530062K07Rik	0.553391	0.388294	-0.840652	-1.34632	-0.505668
9530091C08Rik	0.123644	0.0799101	-2.95854	-3.55792	-0.599376
9830107B12Rik	0.0406394	0.026298	-4.45358	-4.99779	-0.544209
9830132P13Rik	0.0344718	0	-4.66303	-7.64386	-2.98082
9930012K11Rik	4.24446	2.80502	2.08728	1.49058	-0.596699
A230009B12Rik	0.428122	0.100423	-1.20715	-3.24574	-2.03858
A230028O05Rik	0.0707495	0.0171832	-3.72262	-5.49439	-1.77177
A230065H16Rik	0.101493	0	-3.23117	-7.64386	-4.41269
A230072E10Rik	0.0445102	0.0144064	-4.33613	-5.68732	-1.35119
A330015K06Rik	0.0919408	0.0223489	-3.36675	-5.19237	-1.82562
A330093E20Rik	0.0207897	0	-5.27706	-7.64386	-2.36679
A430035B10Rik	0.0529012	0.0257371	-4.11026	-5.02388	-0.913612
A430078I02Rik	0.0601792	0.0389938	-3.93944	-4.50656	-0.567111
A430089I19Rik	0.0557368	0.0271236	-4.04129	-4.96022	-0.918937
A4gnt	0.017937	0	-5.44618	-7.64386	-2.19768
A530064D06Rik	0.181827	0.0885214	-2.42023	-3.41856	-0.998335
A630066F11Rik	0.830484	0.469296	-0.259316	-1.07614	-0.816824
A630089N07Rik	4.46891	2.35809	2.16154	1.24067	-0.920862
A730020E08Rik	0.0943523	0.06126	-3.3313	-3.91572	-0.584415
A730090N16Rik	0.272183	0.151668	-1.85109	-2.67422	-0.823128
A830082N09Rik	0.179804	0.0987771	-2.43593	-3.26844	-0.832508
A930004D18Rik	3.68296	2.42838	1.88282	1.28296	-0.599861
A930006I01Rik	0.0678574	0.0219939	-3.77878	-5.21122	-1.43244
A930006K02Rik	0.64019	0.314494	-0.632204	-1.64614	-1.01394
A930009A15Rik	0.0571381	0	-4.00838	-7.64386	-3.63548
A930012L18Rik	0.848159	0.597764	-0.229113	-0.730335	-0.501221
A930017M01Rik	0.0145536	0	-5.67642	-7.64386	-1.96743
A930041C12Rik	0.552483	0	-0.843	-7.64386	-6.80086
AA474331	2.38818	1.48594	1.25893	0.576222	-0.682707
AA792892	0.181966	0.0888336	-2.41915	-3.41375	-0.994599
AI118078	0.062369	0.0404166	-3.89177	-4.46064	-0.568865
AI182371	0.397918	0.241949	-1.31144	-2.01771	-0.706273
AI197445	0.0100738	0	-6.05181	-7.64386	-1.59204
AI314278	0.0422318	0.0205266	-4.4041	-5.29185	-0.887757
AI450353	3.01844	1.90345	1.59619	0.932401	-0.66379
AI504432	0.00857153	0	-6.20327	-7.64386	-1.44058
AI506816	22.3995	12.3001	4.48572	3.62118	-0.864532
AI854517	0.0138685	0	-5.72788	-7.64386	-1.91598
AU021063	0.849569	0.240265	-0.226731	-2.02759	-1.80086
AU021092	0.431725	0.153109	-1.1952	-2.66101	-1.46581
AU022754	1.00764	0.545513	0.0181214	-0.861151	-0.879273
AU023762	0.0231924	0	-5.14855	-7.64386	-2.49531
AU040972	0.165171	0	-2.55494	-7.64386	-5.08891
AV051173	0.656972	0.432613	-0.595158	-1.19227	-0.597115
Aadac	0.0420622	0	-4.40929	-7.64386	-3.23457
Aadat	0.0581451	0.0283018	-3.98519	-4.90826	-0.923071
Aarsd1	23.5516	15.6467	4.55806	3.96825	-0.589812
Abca14	0.00883641	0	-6.17539	-7.64386	-1.46847
Abca4	0.0259894	0.0125989	-5.01208	-5.82837	-0.81629
Abca6	0.0454599	0.00881823	-4.30872	-6.17728	-1.86856
Abca8a	0.118404	0.0246083	-3.01854	-5.07785	-2.05932
Abca9	0.143408	0	-2.75236	-7.64386	-4.8915
Abcb1b	40.1605	25.9545	5.32788	4.69819	-0.629694
Abcb7	15.7707	9.14993	3.97963	3.19455	-0.785083
Abcc12	0.0212569	0	-5.25116	-7.64386	-2.3927
Abcc5	14.4095	8.34492	3.84945	3.06176	-0.787687
Abcg1	6.10661	3.83493	2.61155	1.94108	-0.670472
Abcg2	11.4345	6.07235	3.51595	2.60344	-0.91251
Abcg8	0.0485902	0.0157301	-4.22189	-5.59213	-1.37024
Abhd14a	10.337	7.27471	3.37044	2.86388	-0.506562
Abhd14b	10.0612	7.10023	3.33145	2.82888	-0.502566
Abhd15	0.54132	0.189814	-0.872182	-2.35983	-1.48765
Abhd16b	0.116661	0	-3.03906	-7.64386	-4.60479
Abi3bp	0.0218434	0	-5.21929	-7.64386	-2.42457
Ablim1	11.1967	7.30683	3.48565	2.87023	-0.615413
Acaca	16.7339	9.58757	4.06513	3.26192	-0.803215
Acacb	0.0331591	0.0214291	-4.71183	-5.24173	-0.5299
Acad10	1.21927	0.819417	0.291922	-0.278554	-0.570476
Ace	0.234755	0.0755507	-2.06037	-3.63396	-1.57359
Acta2	0.232076	0.0751759	-2.07658	-3.64069	-1.56411
Actr3b	0.0912171	0.0296066	-3.37756	-4.85281	-1.47525
Acvrl1	0.108767	0.0527873	-3.13585	-4.1131	-0.977258
Adad2	0.0265735	0	-4.98514	-7.64386	-2.65871
Adam11	0.2243	0.130822	-2.12469	-2.88021	-0.755519
Adam12	7.55934	3.38518	2.91921	1.76136	-1.15785
Adam22	0.0774441	0.0350315	-3.60044	-4.64272	-1.04228
Adam33	0.0158763	0	-5.58199	-7.64386	-2.06187
Adam5	0.0193127	0	-5.36215	-7.64386	-2.28171
Adamts12	0.379517	0.139852	-1.37888	-2.78735	-1.40847
Adamts14	0.119393	0.0356346	-3.00702	-4.62115	-1.61412
Adamts15	0.0639702	0.0387742	-3.85788	-4.51378	-0.655892
Adamts3	0.0372263	0.00601511	-4.56571	-6.50437	-1.93866
Adamts9	2.09545	0.745875	1.0707	-0.413355	-1.48405
Adamtsl3	0.82085	0.444922	-0.276048	-1.15225	-0.876205
Adarb2	11.5898	5.77201	3.53541	2.53032	-1.00508
Adcy1	3.31421	1.71439	1.73084	0.781897	-0.948943
Adcy6	30.988	21.1528	4.95387	4.40312	-0.550753
Adgb	0.0273873	0	-4.94843	-7.64386	-2.69543
Adgra1	0.371912	0.0585106	-1.4077	-3.97686	-2.56916
Adgra2	25.5197	16.4104	4.67382	4.03698	-0.636844
Adgra3	18.8843	11.3557	4.2395	3.50598	-0.733518
Adgrd1	0.0184608	0.00895366	-5.4136	-6.16321	-0.749609
Adgrf5	5.28459	3.44533	2.40316	1.78673	-0.616422
Adgrg3	0.348515	0.0797063	-1.50016	-3.56139	-2.06123
Adgrg7	0.238415	0.142552	-2.03851	-2.7607	-0.722195
Adgrl1	3.97239	2.67839	1.99182	1.42406	-0.567765
Adgrl3	3.1994	1.32981	1.68005	0.416634	-1.26342
Adgrl4	0.0117322	0	-5.90123	-7.64386	-1.74263
Adh6-ps1	0.0531443	0.0172099	-4.10422	-5.49265	-1.38843
Adhfe1	0.0949195	0.0460856	-3.32309	-4.29094	-0.96785
Adig	0.214885	0.106087	-2.18518	-3.17024	-0.985059
Adk	37.3156	24.506	5.2219	4.61536	-0.606543
Aff2	1.22941	0.726091	0.303822	-0.451877	-0.755699
Afm	0.0251978	0	-5.04941	-7.64386	-2.59444
Agap2	0.0170393	0	-5.50378	-7.64386	-2.14008
Agbl3	1.41572	0.957169	0.506622	-0.0556378	-0.56226
Agmat	0.0381992	0	-4.53285	-7.64386	-3.111
Agmo	0.187825	0.114163	-2.37464	-3.06899	-0.694356
Agrn	82.572	55.0587	6.36767	5.78303	-0.584638
Agrp	0.297877	0.0978928	-1.7232	-3.28079	-1.55759
Ahcy	75.5444	48.1823	6.23935	5.59058	-0.648767
Aim1	23.5117	15.2828	4.55561	3.93431	-0.621305
Aim1l	0.482163	0.331341	-1.03752	-1.572	-0.53448
Airn	3.63288	2.01624	1.8631	1.01524	-0.847857
Ajap1	0.0159933	0	-5.57393	-7.64386	-2.06993
Ak8	0.0335494	0	-4.69715	-7.64386	-2.94671
Akp3	0.0620906	0	-3.89775	-7.64386	-3.74611
Akr1c14	0.143057	0.0993202	-2.75578	-3.26091	-0.505134
Akr1d1	0.0917718	0	-3.36927	-7.64386	-4.27459
Aldh1a2	0.0889377	0.0216183	-3.41215	-5.23144	-1.81929
Aldh8a1	0.0449273	0	-4.32403	-7.64386	-3.31983
Alg10b	51.136	31.119	5.67641	4.95996	-0.716453
Alg6	7.53696	3.86606	2.91494	1.95273	-0.962211
Alg8	34.7974	23.8087	5.12111	4.57372	-0.547395
Alk	0.0160206	0.00776843	-5.57205	-6.29128	-0.719223
Alms1	4.54824	2.78466	2.18689	1.48009	-0.706804
Alpl	1.65817	0.767365	0.733936	-0.372645	-1.10658
Als2cr11	0.0237708	0	-5.11925	-7.64386	-2.52461
Alyref2	1.97295	1.38129	0.984006	0.471229	-0.512777
Amh	0.533197	0.183273	-0.893794	-2.4091	-1.51531
Amica1	0.101594	0.0394979	-3.2298	-4.49012	-1.26032
Ammecr1	6.74608	4.68403	2.75512	2.22929	-0.525829
Amy1	0.0628109	0	-3.88234	-7.64386	-3.76152
Anapc1	34.6458	23.6002	5.11482	4.56103	-0.553784
Angpt1	0.724156	0.335128	-0.455701	-1.55585	-1.10015
Angpt4	0.0345632	0	-4.6597	-7.64386	-2.98416
Angptl3	0.0327333	0	-4.72802	-7.64386	-2.91584
Angptl7	0.0493093	0	-4.20266	-7.64386	-3.4412
Ank1	1.96737	1.23795	0.97993	0.313768	-0.666162
Ank2	0.552304	0.279138	-0.843464	-1.81534	-0.971873
Ankdd1b	0.264914	0.185773	-1.88943	-2.39007	-0.500643
Ankk1	0.0184506	0	-5.41423	-7.64386	-2.22962
Ankle1	16.3526	6.09375	4.03189	2.60851	-1.42338
Ankmy1	0.0301327	0.01463	-4.83104	-5.6708	-0.839754
Ankrd10	29.1556	17.5734	4.86595	4.13573	-0.730217
Ankrd26	8.78811	5.75481	3.13637	2.52602	-0.610352
Ankrd28	26.1249	17.3889	4.70763	4.12051	-0.58712
Ankrd34a	0.115355	0.0560491	-3.05463	-4.03389	-0.979254
Ankrd44	1.59609	0.97206	0.679054	-0.0334809	-0.712535
Ankrd61	0.851384	0.449458	-0.22367	-1.13778	-0.914111
Ankrd7	0.093066	0.0454422	-3.3501	-4.30922	-0.959122
Anln	66.8644	45.4688	6.06327	5.50696	-0.556311
Ano9	1.64699	1.10866	0.724205	0.155309	-0.568896
Antxrl	0.0714982	0.023179	-3.70843	-5.14924	-1.44081
Apba1	0.0427213	0.0276165	-4.38922	-4.93825	-0.549031
Apcdd1	9.31732	3.00008	3.22069	1.5874	-1.63329
Apela	0.119033	0.0582579	-3.0112	-3.98261	-0.971406
Apitd1	10.6205	6.2541	3.40946	2.64596	-0.763504
Apln	4.18373	0.936434	2.06651	-0.0870681	-2.15358
Aplnr	0.218016	0.105824	-2.16478	-3.17366	-1.00888
Apoa2	0.905391	0.451547	-0.135442	-1.13116	-0.995723
Apob	44.3144	29.9567	5.46987	4.90505	-0.564819
Apobec2	0.0452218	0	-4.31554	-7.64386	-3.32831
Apod	0.076343	0	-3.61984	-7.64386	-4.02402
Apoh	0.280193	0.0912109	-1.80999	-3.37766	-1.56767
Apon	0.453722	0.18941	-1.12431	-2.36283	-1.23852
Apoo-ps	2.61511	0	1.38963	-7.64386	-9.03348
Aqp1	10.2658	4.85626	3.36048	2.28133	-1.07915
Aqp11	3.93663	1.5202	1.97879	0.608998	-1.36979
Aqp8	158.807	92.0509	7.31118	6.52444	-0.786738
Arc	0.721716	0.467291	-0.460536	-1.08225	-0.621716
Arhgap18	16.1689	10.4987	4.0156	3.39283	-0.62277
Arhgap19	18.2067	11.5654	4.18679	3.53237	-0.654427
Arhgap24	0.162259	0.0603306	-2.57984	-3.9361	-1.35625
Arhgap27os3	0.181217	0.123246	-2.42494	-2.96301	-0.538071
Arhgap31	0.365254	0.177052	-1.43341	-2.45758	-1.02416
Arhgap33	0.520573	0.343919	-0.928037	-1.51904	-0.590999
Arhgap42	4.3748	2.81749	2.13086	1.49697	-0.633897
Arhgdib	0.437651	0.182234	-1.17576	-2.41709	-1.24133
Arhgef17	20.4216	14.4196	4.35238	3.85046	-0.501918
Arhgef6	0.0314614	0	-4.77749	-7.64386	-2.86637
Arl13a	0.0297919	0	-4.8451	-7.64386	-2.79875
Arl14epl	0.0448393	0	-4.32657	-7.64386	-3.31728
Arl6ip5	133.695	79.5892	7.06286	6.31459	-0.748264
Arl9	0.459249	0	-1.10703	-7.64386	-6.53683
Arpp21	0.0300243	0	-4.8355	-7.64386	-2.80836
Arrb1	5.78795	3.42023	2.5343	1.7762	-0.758097
Arsb	13.2804	8.27566	3.73177	3.04975	-0.682024
Arsi	0.030185	0	-4.8289	-7.64386	-2.81496
Art1	0.113367	0.0736899	-3.07866	-3.66768	-0.589017
Arx	0.0179828	0	-5.4433	-7.64386	-2.20055
Asb11	0.0433371	0	-4.37073	-7.64386	-3.27313
Asb15	0.0225286	0	-5.18292	-7.64386	-2.46093
Asb16	0.0395874	0	-4.48722	-7.64386	-3.15664
Asb18	0.0381992	0	-4.53285	-7.64386	-3.111
Asb2	0.0552626	0	-4.05259	-7.64386	-3.59126
Asb5	0.0999884	0.0324707	-3.2517	-4.73809	-1.4864
Ascc3	10.8675	7.55283	3.44261	2.91797	-0.52464
Ascl4	0.0481233	0	-4.23451	-7.64386	-3.40934
Asgr2	0.0392478	0	-4.49825	-7.64386	-3.14561
Asic2	0.018775	0	-5.39441	-7.64386	-2.24945
Aspa	1.06582	0.268015	0.098716	-1.87295	-1.97166
Asph	24.9119	16.9027	4.63905	4.07961	-0.559444
Aspn	0.0644781	0.0414757	-3.8473	-4.42738	-0.580082
Astn2	0.019786	0.00990094	-5.33433	-6.06845	-0.734122
Atad2	57.3835	36.8572	5.84269	5.20407	-0.638619
Atad5	7.91279	4.39463	2.9851	2.13738	-0.847716
Atm	6.87977	3.60508	2.78341	1.85203	-0.931378
Atoh8	14.2236	6.02348	3.83072	2.59179	-1.23893
Atp10a	16.205	10.9366	4.01881	3.45175	-0.56706
Atp10b	0.0136519	0.00661846	-5.74453	-6.42744	-0.682904
Atp11c	10.5284	5.7425	3.3969	2.52293	-0.873965
Atp1b1	39.3853	26.8956	5.29977	4.74957	-0.550202
Atp1b2	1.69532	1.11393	0.765806	0.16212	-0.603687
Atp2b3	0.0139879	0	-5.71878	-7.64386	-1.92508
Atp2c1	20.9452	11.9646	4.38889	3.5813	-0.807589
Atp6v0a4	4.82336	1.96246	2.27153	0.976334	-1.2952
Atp7b	1.34066	0.936101	0.428314	-0.0875785	-0.515892
Atp8a2	0.0263041	0.0127668	-4.9975	-5.81467	-0.817168
Atp8b5	0.0536029	0.0208039	-4.09288	-5.27627	-1.18338
Atr	5.75706	4.03639	2.52658	2.01485	-0.511733
Atrnl1	13.6611	8.76614	3.77253	3.13276	-0.639765
Atrx	24.6272	16.9949	4.62247	4.08745	-0.535019
Atxn7l1os2	0.101462	0.0246764	-3.23159	-5.07454	-1.84295
Awat2	0.679061	0.0999462	-0.547803	-3.25228	-2.70448
Axin2	0.858199	0.306813	-0.212235	-1.68125	-1.46901
Axl	272.546	157.612	8.09038	7.30028	-0.790103
Azgp1	0.0413027	0	-4.43276	-7.64386	-3.2111
B020004J07Rik	0.0258674	0	-5.01777	-7.64386	-2.62608
B130034C11Rik	0.41949	0.260296	-1.2362	-1.91433	-0.678128
B230217C12Rik	0.279338	0.0909301	-1.81432	-3.38187	-1.56755
B230319C09Rik	0.308568	0.0901451	-1.67315	-3.39373	-1.72058
B3galnt2	14.4313	9.77784	3.85163	3.29025	-0.561376
B3galt1	0.0273654	0	-4.9494	-7.64386	-2.69445
B3galt2	0.0837243	0	-3.49453	-7.64386	-4.14933
B3glct	6.84695	4.34012	2.77651	2.1194	-0.657119
B3gnt5	0.010534	0	-6.00843	-7.64386	-1.63543
B3gnt7	0.766138	0.260573	-0.374939	-1.91282	-1.53788
B3gnt8	0.110198	0.0351483	-3.11781	-4.63852	-1.5207
B430010I23Rik	0.0213524	0	-5.24592	-7.64386	-2.39793
B430306N03Rik	0.0140529	0	-5.71385	-7.64386	-1.93001
B4galnt2	0.12972	0.0686665	-2.89196	-3.76285	-0.870883
B930041F14Rik	0.661801	0.367785	-0.584672	-1.42358	-0.838912
B930092H01Rik	0.0185103	0	-5.41056	-7.64386	-2.23329
BC006965	0.0262082	0	-5.00193	-7.64386	-2.64193
BC017158	10.8535	7.46691	3.44075	2.90148	-0.539276
BC021785	0.237292	0.136103	-2.04518	-2.82518	-0.779998
BC026585	0.169026	0.0824679	-2.52263	-3.5151	-0.992477
BC030500	0.327099	0.223045	-1.59031	-2.13261	-0.542295
BC030870	0.683015	0.175192	-0.539488	-2.47239	-1.93291
BC035044	0.0190182	0	-5.37973	-7.64386	-2.26413
BC037032	0.0207225	0.0100527	-5.28083	-6.05383	-0.773009
BC039771	0.194926	0.0947988	-2.32246	-3.32483	-1.00237
BC039966	0.578438	0.143707	-0.777349	-2.74946	-1.97211
BC049762	0.0676076	0	-3.78374	-7.64386	-3.86012
BC051019	0.0527183	0	-4.11483	-7.64386	-3.52903
BC051628	0.0389471	0	-4.50809	-7.64386	-3.13577
BC061237	0.0660461	0	-3.8151	-7.64386	-3.82876
BC080695	0.0482435	0.0234613	-4.23125	-5.13485	-0.903604
Baalc	0.377142	0.106266	-1.38782	-3.16792	-1.7801
Baat	0.210388	0.102354	-2.21499	-3.21955	-1.00456
Bace1	21.3408	13.3329	4.41588	3.73746	-0.678421
Bace2	0.324051	0.176146	-1.60362	-2.46478	-0.861158
Bach2	0.060733	0.0374647	-3.92724	-4.55759	-0.630354
Bag2	27.0181	18.2707	4.75612	4.19185	-0.564267
Bahcc1	16.8907	8.13865	4.07858	3.02568	-1.05291
Bambi	0.123048	0.0275457	-2.96524	-4.94139	-1.97615
Bambi-ps1	0.136069	0	-2.82553	-7.64386	-4.81833
Barx2	0.664028	0.168626	-0.579862	-2.52595	-1.94608
Batf2	0.0392815	0	-4.49715	-7.64386	-3.1467
Bc1	5.46623	0	2.45187	-7.64386	-10.0957
Bcan	0.0149482	0	-5.6476	-7.64386	-1.99626
Bcas1	0.0833124	0	-3.50124	-7.64386	-4.14262
Bche	0.564025	0.258696	-0.813436	-1.92305	-1.10962
Bcl11b	0.0128241	0	-5.81003	-7.64386	-1.83383
Bcl2	7.83754	4.92697	2.97132	2.30216	-0.669157
Bcl9l	14.3643	9.38392	3.84492	3.23096	-0.613959
Begain	0.0182591	0	-5.42606	-7.64386	-2.2178
Bend3	8.95046	6.19671	3.16277	2.63267	-0.530101
Best2	0.0778205	0	-3.59387	-7.64386	-4.04999
Bhlha9	0.182875	0.0892811	-2.41215	-3.40689	-0.994733
Bicc1	20.8474	9.68566	4.38214	3.27659	-1.10555
Bicd1	1.20205	0.786928	0.271485	-0.336559	-0.608044
Birc6	16.4056	10.3636	4.03656	3.37415	-0.662407
Bmp2	0.32683	0.185081	-1.59148	-2.39531	-0.80383
Bmp7	32.9829	17.3612	5.04387	4.11821	-0.925655
Boc	0.0433495	0.0105155	-4.37036	-6.01015	-1.63979
Bpi	0.0290911	0	-4.87446	-7.64386	-2.7694
Bpifc	0.0431275	0	-4.37699	-7.64386	-3.26686
Bptf	17.6899	12.1994	4.14526	3.60933	-0.535932
Brca2	5.15355	3.55564	2.36697	1.83214	-0.534829
Brip1	4.44145	2.91491	2.15265	1.54592	-0.60673
Brsk2	0.0357401	0	-4.61741	-7.64386	-3.02645
Btbd16	0.0566993	0.0137621	-4.0186	-5.73603	-1.71743
Btbd18	0.138069	0.0536161	-2.80522	-4.09256	-1.28734
Btg4	0.0828298	0	-3.50915	-7.64386	-4.13471
Btk	0.0392939	0	-4.49675	-7.64386	-3.14711
Btnl9	0.0202738	0	-5.30621	-7.64386	-2.33764
Bub1	40.8449	25.7318	5.35226	4.68576	-0.6665
Bzrap1	0.0740959	0.0119725	-3.66025	-5.88066	-2.2204
C030013C21Rik	0.310852	0.0763212	-1.66268	-3.62022	-1.95755
C030029H02Rik	0.0220735	0	-5.20697	-7.64386	-2.43688
C130026I21Rik	0.0272157	0	-4.95609	-7.64386	-2.68776
C130046K22Rik	1.32307	0.84367	0.409331	-0.236724	-0.646056
C130050O18Rik	0.279663	0.0494844	-1.81267	-4.19801	-2.38534
C130060C02Rik	0.0962465	0.0470086	-3.30406	-4.26511	-0.96105
C130083M11Rik	0.196285	0.119328	-2.31269	-3.00778	-0.695088
C1ql1	0.44004	0.300669	-1.16799	-1.70996	-0.541965
C1qtnf1	1.88153	0.769046	0.915735	-0.369509	-1.28524
C1qtnf5	0.0830235	0.0424141	-3.50597	-4.39854	-0.892573
C230024C17Rik	0.014614	0	-5.67197	-7.64386	-1.97188
C230035I16Rik	0.556782	0.220056	-0.831918	-2.15164	-1.31973
C2cd2	2.37059	1.6489	1.24829	0.725872	-0.522414
C330013E15Rik	1.49844	1.00162	0.588267	0.00951917	-0.578748
C330024D21Rik	0.0894746	0.0173855	-3.40393	-5.48129	-2.07736
C330027C09Rik	29.7024	20.2119	4.89275	4.33749	-0.555261
C3ar1	0.491875	0.0542381	-1.00905	-4.07733	-3.06829
C430049B03Rik	1.29702	0.872243	0.380752	-0.188952	-0.569703
C4bp	0.57302	0.238992	-0.790809	-2.03509	-1.24429
C530044C16Rik	0.0886045	0	-3.41728	-7.64386	-4.22658
C5ar2	0.0567823	0.0275619	-4.01666	-4.94067	-0.924009
C630043F03Rik	0.977486	0.501756	-0.0254912	-0.980637	-0.955146
C730027H18Rik	0.764824	0.403657	-0.377399	-1.29104	-0.913638
C87436	5.47364	2.87346	2.45382	1.5253	-0.928521
C8g	0.327685	0.179634	-1.58777	-2.43726	-0.849489
CK137956	0.0456901	0	-4.30215	-7.64386	-3.3417
Cabp2	0.110682	0	-3.11176	-7.64386	-4.53209
Cabp5	0.178403	0	-2.44691	-7.64386	-5.19695
Cacna1c	0.0476871	0.0202485	-4.24641	-5.30766	-1.06125
[truncated: 2,486 more rows]

## Sheet: Up-regulated_GO
Gene Ontology	GO:0008285~negative regulation of cell proliferation	GO:0002376~immune system process	GO:0034599~cellular response to oxidative stress	GO:0043065~positive regulation of apoptotic process	GO:0006915~apoptotic process	GO:0042981~regulation of apoptotic process
[truncated: 109 more rows]

[truncated: 1 more sheets: Down-regulated_GO]
